# Supplementary material for: RNA-Seq Analysis of Developing Grains of Wheat to Intrigue Into the Complex Molecular Mechanism of the Heat Stress Response
Source: Front Plant Sci. 2022 Jun 2;13:904392. doi: 10.3389/fpls.2022.904392 (PMC9201344; doi:10.3389/fpls.2022.904392)
Supplement: Supplementary file 4 [file Table_4.XLSX]

## Sheet: 1. C1vs.C2
		Supplementary file 4. Identified transcriptional factors (TFs)
Sequence name	Sequence desc.	Sequence length	Hit desc.	Hit ACC	E-Value	Similarity	Bit-Score	Alignment length	Positives
TRINITY_DN458213_c1_g1_i1	WRKY	1069	gnl|BL_ORD_ID|297285TRIUR3_09883-P1 Triticum urartu|WRKY|WRKY family protein	297285	2.01844e-13	70.3125	74.3294	64	45
TRINITY_DN493982_c0_g1_i4	Dof	1927	gnl|BL_ORD_ID|148616GSMUA_Achr5P12010_001 Musa acuminata|Dof|Dof family protein	148616	4.40357e-16	60.1942	83.1889	103	62
TRINITY_DN523732_c1_g2_i1	BES1	757	gnl|BL_ORD_ID|250999Sobic.002G136200.2.p Sorghum bicolor|BES1|BES1 family protein	250999	8.90101e-16	62.8205	79.7221	78	49
TRINITY_DN414234_c0_g1_i1	WRKY	285	gnl|BL_ORD_ID|216605PH01000046G0930 Phyllostachys heterocycla|WRKY|WRKY family protein	216605	4.14378e-33	80.6452	125.946	93	75
TRINITY_DN521529_c1_g5_i1	NAC	295	gnl|BL_ORD_ID|250793Rsa1.0_00835.1_g00007.1 Raphanus sativus|NAC|NAC family protein	250793	0.0352803	47.619	35.039	63	30
TRINITY_DN493982_c0_g1_i6	Dof	2019	gnl|BL_ORD_ID|148616GSMUA_Achr5P12010_001 Musa acuminata|Dof|Dof family protein	148616	4.89755e-14	62.3656	77.0258	93	58
TRINITY_DN518599_c1_g1_i2	WRKY	1862	gnl|BL_ORD_ID|216605PH01000046G0930 Phyllostachys heterocycla|WRKY|WRKY family protein	216605	9.12338e-101	82.0628	336.265	223	183
TRINITY_DN518599_c1_g1_i15	WRKY	2205	gnl|BL_ORD_ID|216605PH01000046G0930 Phyllostachys heterocycla|WRKY|WRKY family protein	216605	1.81636e-107	85.3175	358.221	252	215
TRINITY_DN518599_c1_g1_i7	WRKY	2406	gnl|BL_ORD_ID|216605PH01000046G0930 Phyllostachys heterocycla|WRKY|WRKY family protein	216605	7.83615e-174	83.9779	536.184	362	304
TRINITY_DN518599_c1_g1_i12	WRKY	1948	gnl|BL_ORD_ID|216605PH01000046G0930 Phyllostachys heterocycla|WRKY|WRKY family protein	216605	4.98544e-69	78.7709	247.284	179	141
TRINITY_DN518599_c1_g1_i11	WRKY	1508	gnl|BL_ORD_ID|216605PH01000046G0930 Phyllostachys heterocycla|WRKY|WRKY family protein	216605	2.0394e-66	68.7805	235.728	205	141
TRINITY_DN500279_c0_g2_i3	BES1	594	gnl|BL_ORD_ID|43088Brast05G222500.1.p Brachypodium stacei|BES1|BES1 family protein	43088	1.24274e-18	73.1183	87.4261	93	68
TRINITY_DN500279_c0_g2_i1	BES1	645	gnl|BL_ORD_ID|94846462903533 Eragrostis tef|BES1|BES1 family protein	94846	1.08534e-16	72.043	82.4185	93	67
TRINITY_DN497488_c1_g2_i13	MYB	1446	gnl|BL_ORD_ID|149895GSMUA_Achr8P25970_001 Musa acuminata|MYB|MYB family protein	149895	6.4277e-58	66.9811	205.682	212	142
TRINITY_DN491120_c4_g4_i3	FAR1	1056	gnl|BL_ORD_ID|204816Peaxi162Scf00170g01227.1 Petunia axillaris|FAR1|FAR1 family protein	204816	0.000516187	41.8327	45.4394	251	105
TRINITY_DN523937_c2_g2_i1	WRKY	718	gnl|BL_ORD_ID|216605PH01000046G0930 Phyllostachys heterocycla|WRKY|WRKY family protein	216605	1.84478e-23	69.3878	103.219	98	68
TRINITY_DN500279_c0_g4_i8	BES1	1357	gnl|BL_ORD_ID|167703NNU_006705-RA Nelumbo nucifera|BES1|BES1 family protein	167703	5.0697e-25	72.9412	111.309	85	62
TRINITY_DN518599_c1_g1_i10	WRKY	2077	gnl|BL_ORD_ID|216605PH01000046G0930 Phyllostachys heterocycla|WRKY|WRKY family protein	216605	5.6291e-135	83.5616	430.254	292	244
TRINITY_DN506848_c2_g1_i4	G2-like	681	gnl|BL_ORD_ID|40911XP_009123613.1 Brassica rapa|G2-like|G2-like family protein	40911	1.18914e-17	52.8169	83.9593	142	75
TRINITY_DN380179_c0_g1_i1	BES1	271	gnl|BL_ORD_ID|94846462903533 Eragrostis tef|BES1|BES1 family protein	94846	1.94363e-32	79.5455	123.25	88	70
TRINITY_DN523034_c1_g6_i5	GeBP protein	456	gnl|BL_ORD_ID|318638Zpz_sc00228.1.g00060.1.am.mk Zoysia pacifica|GeBP|GeBP family protein	318638	0.0264932	43.4211	36.965	76	33
TRINITY_DN523034_c1_g6_i2	GeBP protein	825	gnl|BL_ORD_ID|318638Zpz_sc00228.1.g00060.1.am.mk Zoysia pacifica|GeBP|GeBP family protein	318638	0.0261396	45	39.2762	100	45
TRINITY_DN484649_c0_g2_i1	Trihelix	1745	gnl|BL_ORD_ID|5767Aco017242.1 Ananas comosus|Trihelix|Trihelix family protein	5767	9.46696e-10	39.1061	65.0846	358	140
TRINITY_DN517976_c1_g2_i4	WRKY	1762	gnl|BL_ORD_ID|98133mrna31843.1-v1.0-hybrid Fragaria vesca|WRKY|WRKY family protein	98133	3.93145e-56	60.3175	206.453	252	152
TRINITY_DN523034_c1_g6_i9	GeBP protein	628	gnl|BL_ORD_ID|318638Zpz_sc00228.1.g00060.1.am.mk Zoysia pacifica|GeBP|GeBP family protein	318638	1.83667e-06	45.7627	50.8322	118	54
TRINITY_DN500279_c0_g4_i18	BES1	1322	gnl|BL_ORD_ID|167703NNU_006705-RA Nelumbo nucifera|BES1|BES1 family protein	167703	3.50843e-25	72.9412	111.694	85	62
TRINITY_DN480007_c0_g1_i3	Trihelix	1004	gnl|BL_ORD_ID|5767Aco017242.1 Ananas comosus|Trihelix|Trihelix family protein	5767	3.04405e-10	44.4444	64.6994	243	108
TRINITY_DN506197_c0_g1_i1	NF-YC	2247	gnl|BL_ORD_ID|296213TRIUR3_29815-P1 Triticum urartu|NF-YC|NF-YC family protein	296213	2.20051e-69	98.2659	235.343	173	170
TRINITY_DN447598_c0_g1_i2	GeBP protein	574	gnl|BL_ORD_ID|318638Zpz_sc00228.1.g00060.1.am.mk Zoysia pacifica|GeBP|GeBP family protein	318638	0.000566684	44.9541	43.1282	109	49
TRINITY_DN498825_c0_g1_i5	GeBP protein	1040	gnl|BL_ORD_ID|318638Zpz_sc00228.1.g00060.1.am.mk Zoysia pacifica|GeBP|GeBP family protein	318638	9.56093e-08	44.5455	56.9954	110	49
TRINITY_DN491120_c4_g2_i1	Trihelix	534	gnl|BL_ORD_ID|5767Aco017242.1 Ananas comosus|Trihelix|Trihelix family protein	5767	7.55092e-06	44.5714	48.1358	175	78
TRINITY_DN517976_c1_g2_i2	WRKY	543	gnl|BL_ORD_ID|98133mrna31843.1-v1.0-hybrid Fragaria vesca|WRKY|WRKY family protein	98133	2.99784e-23	59.1463	100.523	164	97
TRINITY_DN506848_c2_g1_i5	G2-like	1129	gnl|BL_ORD_ID|40911XP_009123613.1 Brassica rapa|G2-like|G2-like family protein	40911	1.48981e-11	56.701	68.5514	97	55
TRINITY_DN523732_c1_g2_i2	BES1	1788	gnl|BL_ORD_ID|250999Sobic.002G136200.2.p Sorghum bicolor|BES1|BES1 family protein	250999	1.12379e-43	66.6667	168.318	162	108
TRINITY_DN506848_c0_g1_i1	G2-like	672	gnl|BL_ORD_ID|40911XP_009123613.1 Brassica rapa|G2-like|G2-like family protein	40911	0.0195871	46.6019	38.5058	103	48
TRINITY_DN489763_c0_g1_i2	BBR-BPC	1002	gnl|BL_ORD_ID|97717FANhyb_rscf00000253.1.g00010.1 Fragaria x ananassa|BBR-BPC|BBR-BPC family protein	97717	1.21898e-46	62.6943	171.785	193	121
TRINITY_DN517976_c0_g3_i2	WRKY	636	gnl|BL_ORD_ID|98133mrna31843.1-v1.0-hybrid Fragaria vesca|WRKY|WRKY family protein	98133	7.58152e-43	69.7183	157.147	142	99
TRINITY_DN482016_c5_g1_i3	GeBP protein	683	gnl|BL_ORD_ID|318638Zpz_sc00228.1.g00060.1.am.mk Zoysia pacifica|GeBP|GeBP family protein	318638	0.00975306	42.8571	40.0466	84	36
TRINITY_DN461989_c3_g2_i1	MYB	696	gnl|BL_ORD_ID|286573Traes_4AS_A79A68739.1 Triticum aestivum|MYB|MYB family protein	286573	3.52663e-51	89.2562	173.326	121	108
TRINITY_DN514269_c1_g1_i9	C2H2	637	gnl|BL_ORD_ID|316278Zmw_sc06582.1.g00020.1 Zoysia matrella|C2H2|C2H2 family protein	316278	1.15436e-05	48.4536	48.521	97	47
TRINITY_DN514269_c1_g1_i6	C2H2	1096	gnl|BL_ORD_ID|316278Zmw_sc06582.1.g00020.1 Zoysia matrella|C2H2|C2H2 family protein	316278	0.0276342	50.7692	39.6614	65	33
TRINITY_DN523034_c1_g5_i2	GeBP protein	677	gnl|BL_ORD_ID|318638Zpz_sc00228.1.g00060.1.am.mk Zoysia pacifica|GeBP|GeBP family protein	318638	0.00616149	55.5556	40.4318	45	25
TRINITY_DN490870_c0_g1_i3	G2-like	1379	gnl|BL_ORD_ID|40911XP_009123613.1 Brassica rapa|G2-like|G2-like family protein	40911	1.55425e-41	48.9914	157.532	347	170
TRINITY_DN500279_c0_g4_i3	BES1	680	gnl|BL_ORD_ID|107590Gh_D11G0932 Gossypium hirsutum|BES1|BES1 family protein	107590	1.28309e-27	61.7188	114.775	128	79
TRINITY_DN503929_c1_g1_i8	C2H2	1875	gnl|BL_ORD_ID|313123Zosma1g03330.1 Zostera marina|C2H2|C2H2 family protein	313123	2.35994e-07	46.8354	56.9954	158	74
TRINITY_DN516667_c1_g2_i3	ARR-B	1430	gnl|BL_ORD_ID|103583Gh_D11G1176 Gossypium hirsutum|ARR-B|ARR-B family protein	103583	9.08469e-10	55.6452	63.5438	124	69
TRINITY_DN495434_c0_g1_i1	BBR-BPC	1233	gnl|BL_ORD_ID|97717FANhyb_rscf00000253.1.g00010.1 Fragaria x ananassa|BBR-BPC|BBR-BPC family protein	97717	1.61968e-32	56.7164	133.265	201	114
TRINITY_DN514269_c1_g1_i3	C2H2	786	gnl|BL_ORD_ID|316278Zmw_sc06582.1.g00020.1 Zoysia matrella|C2H2|C2H2 family protein	316278	0.0135799	50.7692	40.0466	65	33
TRINITY_DN516571_c0_g1_i2	WRKY	2666	gnl|BL_ORD_ID|184065OGLUM12G00050.4 Oryza glumaepatula|WRKY|WRKY family protein	184065	4.3488e-11	46.8085	70.4774	282	132
TRINITY_DN506197_c0_g1_i8	NF-YC	2224	gnl|BL_ORD_ID|20447EMT10121 Aegilops tauschii|NF-YC|NF-YC family protein	20447	6.50727e-70	91.4286	236.884	175	160
TRINITY_DN500279_c0_g2_i8	BES1	849	gnl|BL_ORD_ID|8515Aqcoe7G033500.2.p Aquilegia coerulea|BES1|BES1 family protein	8515	1.62306e-11	77.2727	67.3958	44	34
TRINITY_DN326822_c0_g2_i2	G2-like	1215	gnl|BL_ORD_ID|40911XP_009123613.1 Brassica rapa|G2-like|G2-like family protein	40911	9.58903e-22	48.1013	98.9821	237	114
TRINITY_DN500279_c0_g4_i16	BES1	1632	gnl|BL_ORD_ID|213666Pgl008855 Picea glauca|BES1|BES1 family protein	213666	1.45202e-18	61.7021	92.4337	94	58
TRINITY_DN493944_c3_g1_i2	Nin-like	1588	gnl|BL_ORD_ID|316447Zmw_sc06576.1.g00010.1 Zoysia matrella|Nin-like|Nin-like family protein	316447	6.03594e-16	68.2353	83.9593	85	58
TRINITY_DN491120_c3_g1_i2	Trihelix	1612	gnl|BL_ORD_ID|5767Aco017242.1 Ananas comosus|Trihelix|Trihelix family protein	5767	4.51686e-14	39.5415	78.5666	349	138
TRINITY_DN473719_c0_g1_i2	NAC	691	gnl|BL_ORD_ID|297337TRIUR3_01582-P1 Triticum urartu|NAC|NAC family protein	297337	1.03446e-90	98.9247	277.33	186	184
TRINITY_DN508098_c1_g1_i3	B3	993	gnl|BL_ORD_ID|152126MDP0000266051 Malus domestica|B3|B3 family protein	152126	1.42572e-06	63.0769	53.1434	65	41
TRINITY_DN326822_c0_g2_i1	G2-like	1321	gnl|BL_ORD_ID|40911XP_009123613.1 Brassica rapa|G2-like|G2-like family protein	40911	3.02502e-21	48.1013	98.2117	237	114
TRINITY_DN414234_c0_g1_i2	WRKY	479	gnl|BL_ORD_ID|216605PH01000046G0930 Phyllostachys heterocycla|WRKY|WRKY family protein	216605	1.92281e-15	85.1064	77.411	47	40
TRINITY_DN518599_c1_g1_i13	WRKY	2115	gnl|BL_ORD_ID|216605PH01000046G0930 Phyllostachys heterocycla|WRKY|WRKY family protein	216605	0	84.6914	615.15	405	343
TRINITY_DN522417_c8_g4_i3	bZIP	2088	gnl|BL_ORD_ID|284548TRAES3BF111600160CFD_t1 Triticum aestivum|bZIP|bZIP family protein	284548	6.35014e-177	95.3846	516.924	390	372
TRINITY_DN500279_c0_g4_i4	BES1	1761	gnl|BL_ORD_ID|213666Pgl008855 Picea glauca|BES1|BES1 family protein	213666	1.76052e-18	61.7021	92.4337	94	58
TRINITY_DN515156_c1_g3_i12	G2-like	2065	gnl|BL_ORD_ID|40911XP_009123613.1 Brassica rapa|G2-like|G2-like family protein	40911	3.38364e-20	45.5752	96.6709	226	103
TRINITY_DN502470_c0_g1_i2	NAC	542	gnl|BL_ORD_ID|297337TRIUR3_01582-P1 Triticum urartu|NAC|NAC family protein	297337	2.81546e-59	100	194.512	104	104
TRINITY_DN518537_c0_g3_i3	STAT	362	gnl|BL_ORD_ID|258064676709864 Sisymbrium irio|STAT|STAT family protein	258064	1.58866e-16	59.0476	79.337	105	62
TRINITY_DN514156_c3_g1_i8	Trihelix	1815	gnl|BL_ORD_ID|5767Aco017242.1 Ananas comosus|Trihelix|Trihelix family protein	5767	7.14324e-10	44.2006	65.4698	319	141
TRINITY_DN493944_c0_g1_i1	Nin-like	518	gnl|BL_ORD_ID|316447Zmw_sc06576.1.g00010.1 Zoysia matrella|Nin-like|Nin-like family protein	316447	1.57701e-06	59.6491	50.0618	57	34
TRINITY_DN505184_c1_g1_i9	HD-ZIP	670	gnl|BL_ORD_ID|201895Oropetium_20150105_18558A Oropetium thomaeum|HD-ZIP|HD-ZIP family protein	201895	0.00247104	57.3529	41.5874	68	39
TRINITY_DN489233_c0_g1_i7	G2-like	1169	gnl|BL_ORD_ID|40911XP_009123613.1 Brassica rapa|G2-like|G2-like family protein	40911	6.43342e-25	49.5798	107.842	238	118
TRINITY_DN506197_c0_g1_i5	NF-YC	2418	gnl|BL_ORD_ID|20447EMT10121 Aegilops tauschii|NF-YC|NF-YC family protein	20447	9.46898e-75	98.2857	250.751	175	172
TRINITY_DN506197_c0_g1_i6	NF-YC	1872	gnl|BL_ORD_ID|20447EMT10121 Aegilops tauschii|NF-YC|NF-YC family protein	20447	6.89664e-71	91.4286	236.884	175	160
TRINITY_DN500279_c0_g4_i1	BES1	1726	gnl|BL_ORD_ID|213666Pgl008855 Picea glauca|BES1|BES1 family protein	213666	1.67403e-18	61.7021	92.4337	94	58
TRINITY_DN511468_c0_g1_i6	Trihelix	1619	gnl|BL_ORD_ID|5767Aco017242.1 Ananas comosus|Trihelix|Trihelix family protein	5767	2.3092e-09	42.3077	63.5438	286	121
TRINITY_DN511410_c6_g7_i1	GATA	791	gnl|BL_ORD_ID|186361KN538788.1_FGP023 Oryza longistaminata|GATA|GATA family protein	186361	2.97543e-23	57.1429	103.605	133	76
TRINITY_DN493944_c3_g1_i4	Nin-like	854	gnl|BL_ORD_ID|316447Zmw_sc06576.1.g00010.1 Zoysia matrella|Nin-like|Nin-like family protein	316447	5.53366e-21	58.8235	95.9005	119	70
TRINITY_DN522417_c8_g4_i11	bZIP	1457	gnl|BL_ORD_ID|285499TRAES3BF111600130CFD_t1 Triticum aestivum|bZIP|bZIP family protein	285499	2.86467e-129	95.8333	387.497	288	276
TRINITY_DN506197_c0_g1_i7	NF-YC	1330	gnl|BL_ORD_ID|20447EMT10121 Aegilops tauschii|NF-YC|NF-YC family protein	20447	4.0043e-68	100	224.942	124	124
TRINITY_DN500279_c0_g4_i13	BES1	1597	gnl|BL_ORD_ID|213666Pgl008855 Picea glauca|BES1|BES1 family protein	213666	1.36518e-18	61.7021	92.4337	94	58
TRINITY_DN503929_c1_g1_i4	C2H2	2285	gnl|BL_ORD_ID|313123Zosma1g03330.1 Zostera marina|C2H2|C2H2 family protein	313123	2.34195e-07	46.8354	57.3806	158	74
TRINITY_DN474705_c4_g3_i3	B3	1267	gnl|BL_ORD_ID|152880MDP0000252727 Malus domestica|B3|B3 family protein	152880	1.00874e-70	64.3885	243.432	278	179
TRINITY_DN514156_c3_g1_i7	Trihelix	1027	gnl|BL_ORD_ID|5767Aco017242.1 Ananas comosus|Trihelix|Trihelix family protein	5767	2.55028e-10	45.339	65.0846	236	107
TRINITY_DN509958_c0_g1_i6	MYB	1296	gnl|BL_ORD_ID|306240Zjn_sc00020.1.g02760.1.am.mk Zoysia japonica|MYB_related|MYB_related family protein	306240	2.72932e-27	65.3631	118.627	179	117
TRINITY_DN481228_c0_g3_i1	CO-like	840	gnl|BL_ORD_ID|150863MDP0000565292 Malus domestica|CO-like|CO-like family protein	150863	1.22054e-37	71.6312	144.05	141	101
TRINITY_DN480007_c0_g1_i5	Trihelix	1658	gnl|BL_ORD_ID|5767Aco017242.1 Ananas comosus|Trihelix|Trihelix family protein	5767	2.59797e-20	43.2836	98.5969	335	145
TRINITY_DN225212_c0_g2_i1	E2F DP	1510	gnl|BL_ORD_ID|192570OPUNC10G09700.4 Oryza punctata|E2F/DP|E2F/DP family protein	192570	3.85824e-84	56.3596	288.886	456	257
TRINITY_DN513225_c0_g3_i11	C3H	2547	gnl|BL_ORD_ID|21285EMT18734 Aegilops tauschii|C3H|C3H family protein	21285	1.28393e-142	87.0432	430.254	301	262
TRINITY_DN508098_c1_g1_i5	B3	1192	gnl|BL_ORD_ID|152126MDP0000266051 Malus domestica|B3|B3 family protein	152126	7.98342e-12	64.557	70.0922	79	51
TRINITY_DN416434_c0_g4_i1	ERF	1123	gnl|BL_ORD_ID|296375TRIUR3_04273-P1 Triticum urartu|ERF|ERF family protein	296375	1.97579e-87	86.8571	277.33	175	152
TRINITY_DN479380_c1_g1_i5	B3	1403	gnl|BL_ORD_ID|269752Sopen08g002450.1 Solanum pennellii|B3|B3 family protein	269752	4.52216e-52	49.5575	188.348	339	168
TRINITY_DN482489_c0_g1_i2	Trihelix	1672	gnl|BL_ORD_ID|5767Aco017242.1 Ananas comosus|Trihelix|Trihelix family protein	5767	9.22686e-14	43.4483	77.7962	290	126
TRINITY_DN473719_c0_g1_i1	NAC	615	gnl|BL_ORD_ID|285537Traes_7DS_6418D89A3.1 Triticum aestivum|NAC|NAC family protein	285537	4.64961e-95	96.8944	287.345	161	156
TRINITY_DN508100_c0_g1_i19	WRKY	2287	gnl|BL_ORD_ID|181232OB11G10730.1 Oryza brachyantha|WRKY|WRKY family protein	181232	0	79.7468	559.296	395	315
TRINITY_DN500279_c0_g4_i14	BES1	975	gnl|BL_ORD_ID|148990GSMUA_Achr1P17440_001 Musa acuminata|BES1|BES1 family protein	148990	3.76896e-42	64.1892	158.688	148	95
TRINITY_DN492876_c1_g3_i1	Dof	1615	gnl|BL_ORD_ID|319209Zpz_sc00083.1.g00290.1.am.mk Zoysia pacifica|Dof|Dof family protein	319209	1.62563e-40	48.0892	158.303	314	151
TRINITY_DN518599_c1_g2_i2	WRKY	274	gnl|BL_ORD_ID|216605PH01000046G0930 Phyllostachys heterocycla|WRKY|WRKY family protein	216605	8.47677e-14	84.2105	70.0922	38	32
TRINITY_DN517976_c0_g3_i1	WRKY	901	gnl|BL_ORD_ID|98133mrna31843.1-v1.0-hybrid Fragaria vesca|WRKY|WRKY family protein	98133	1.04496e-41	68.4932	157.147	146	100
TRINITY_DN523803_c3_g8_i8	MYB	567	gnl|BL_ORD_ID|20884EMT19036 Aegilops tauschii|MYB_related|MYB_related family protein	20884	5.66148e-117	91.0053	345.51	189	172
TRINITY_DN515124_c1_g1_i6	MYB	1494	gnl|BL_ORD_ID|104322Gh_D05G3059 Gossypium hirsutum|MYB_related|MYB_related family protein	104322	4.36338e-16	100	79.7221	40	40
TRINITY_DN479380_c1_g1_i3	B3	1497	gnl|BL_ORD_ID|269752Sopen08g002450.1 Solanum pennellii|B3|B3 family protein	269752	7.70217e-28	50.5	119.013	200	101
TRINITY_DN491384_c5_g2_i2	M-type_MADS	1443	gnl|BL_ORD_ID|12509AHYPO_010561-RA Amaranthus hypochondriacus|M-type_MADS|M-type_MADS family protein	12509	4.95499e-05	44.0678	48.521	177	78
TRINITY_DN490870_c0_g1_i2	G2-like	1840	gnl|BL_ORD_ID|40911XP_009123613.1 Brassica rapa|G2-like|G2-like family protein	40911	1.20469e-16	51.2195	85.5001	164	84
TRINITY_DN484649_c0_g1_i1	Trihelix	1900	gnl|BL_ORD_ID|5767Aco017242.1 Ananas comosus|Trihelix|Trihelix family protein	5767	7.22325e-11	39.0582	68.5514	361	141
TRINITY_DN518537_c0_g3_i5	STAT	799	gnl|BL_ORD_ID|258064676709864 Sisymbrium irio|STAT|STAT family protein	258064	1.30258e-39	54.9618	152.14	262	144
TRINITY_DN508100_c0_g1_i4	WRKY	2212	gnl|BL_ORD_ID|181232OB11G10730.1 Oryza brachyantha|WRKY|WRKY family protein	181232	0	85.1351	572.007	370	315
TRINITY_DN514666_c4_g5_i2	Trihelix	1561	gnl|BL_ORD_ID|5767Aco017242.1 Ananas comosus|Trihelix|Trihelix family protein	5767	1.30803e-10	40.0631	67.3958	317	127
TRINITY_DN514114_c2_g6_i16	HB-other	1052	gnl|BL_ORD_ID|296668TRIUR3_24308-P1 Triticum urartu|HB-other|HB-other family protein	296668	1.17174e-163	83.4356	472.241	326	272
TRINITY_DN477761_c1_g1_i4	GeBP protein	518	gnl|BL_ORD_ID|318638Zpz_sc00228.1.g00060.1.am.mk Zoysia pacifica|GeBP|GeBP family protein	318638	0.00155127	57.5	41.2022	40	23
TRINITY_DN518537_c0_g3_i1	STAT	700	gnl|BL_ORD_ID|258064676709864 Sisymbrium irio|STAT|STAT family protein	258064	5.20807e-29	56.9061	119.783	181	103
TRINITY_DN503167_c1_g2_i1	C2H2	1874	gnl|BL_ORD_ID|297071TRIUR3_29811-P1 Triticum urartu|C2H2|C2H2 family protein	297071	0	94.5763	534.643	295	279
TRINITY_DN508098_c1_g1_i4	B3	1857	gnl|BL_ORD_ID|152126MDP0000266051 Malus domestica|B3|B3 family protein	152126	1.21792e-11	62.069	70.8626	87	54
TRINITY_DN523803_c1_g3_i3	MYB	352	gnl|BL_ORD_ID|20067EMT25286 Aegilops tauschii|MYB_related|MYB_related family protein	20067	1.34921e-77	98.2906	240.35	117	115
TRINITY_DN477761_c1_g1_i2	GeBP protein	601	gnl|BL_ORD_ID|318638Zpz_sc00228.1.g00060.1.am.mk Zoysia pacifica|GeBP|GeBP family protein	318638	0.00252963	57.5	41.2022	40	23
TRINITY_DN496406_c0_g1_i11	ERF	928	gnl|BL_ORD_ID|257900676725992 Sisymbrium irio|ERF|ERF family protein	257900	6.21483e-05	61.5385	47.3654	52	32
TRINITY_DN416434_c0_g1_i1	ERF	681	gnl|BL_ORD_ID|296375TRIUR3_04273-P1 Triticum urartu|ERF|ERF family protein	296375	3.84368e-10	88.5714	61.6178	35	31
TRINITY_DN521088_c3_g4_i4	B3	2438	gnl|BL_ORD_ID|176973XP_009588506.1 Nicotiana tomentosiformis|B3|B3 family protein	176973	3.29795e-14	71.4286	75.8702	70	50
TRINITY_DN511468_c0_g1_i1	Trihelix	1121	gnl|BL_ORD_ID|5767Aco017242.1 Ananas comosus|Trihelix|Trihelix family protein	5767	9.09837e-08	43.2653	57.3806	245	106
TRINITY_DN518537_c0_g3_i15	STAT	823	gnl|BL_ORD_ID|258064676709864 Sisymbrium irio|STAT|STAT family protein	258064	1.11333e-13	49.4048	73.9442	168	83
TRINITY_DN472676_c0_g1_i6	Dof	611	gnl|BL_ORD_ID|285237Traes_5BL_44A8BCF95.1 Triticum aestivum|Dof|Dof family protein	285237	9.32534e-25	100	102.834	64	64
TRINITY_DN500279_c0_g4_i7	BES1	737	gnl|BL_ORD_ID|246096RrC2092_p1 Raphanus raphanistrum|BES1|BES1 family protein	246096	1.1681e-33	65.7658	132.88	111	73
TRINITY_DN490870_c0_g1_i1	G2-like	1764	gnl|BL_ORD_ID|40911XP_009123613.1 Brassica rapa|G2-like|G2-like family protein	40911	3.05637e-17	49.2063	87.4261	189	93
TRINITY_DN521088_c3_g4_i2	B3	2593	gnl|BL_ORD_ID|176973XP_009588506.1 Nicotiana tomentosiformis|B3|B3 family protein	176973	1.99997e-14	71.4286	76.6406	70	50
TRINITY_DN506848_c2_g1_i3	G2-like	555	gnl|BL_ORD_ID|40911XP_009123613.1 Brassica rapa|G2-like|G2-like family protein	40911	5.02465e-18	52.8169	83.9593	142	75
TRINITY_DN518537_c0_g3_i19	STAT	648	gnl|BL_ORD_ID|258064676709864 Sisymbrium irio|STAT|STAT family protein	258064	3.86229e-10	61.5385	62.003	91	56
TRINITY_DN515599_c1_g1_i3	Trihelix	2109	gnl|BL_ORD_ID|5767Aco017242.1 Ananas comosus|Trihelix|Trihelix family protein	5767	5.41682e-13	39.1608	75.8702	286	112
TRINITY_DN515599_c1_g1_i8	Trihelix	1844	gnl|BL_ORD_ID|5767Aco017242.1 Ananas comosus|Trihelix|Trihelix family protein	5767	3.1548e-11	39.8551	69.707	276	110
TRINITY_DN515156_c1_g3_i13	G2-like	1728	gnl|BL_ORD_ID|40911XP_009123613.1 Brassica rapa|G2-like|G2-like family protein	40911	7.09645e-43	47.3988	162.925	346	164
TRINITY_DN505151_c0_g1_i9	MYB	1612	gnl|BL_ORD_ID|296937TRIUR3_20797-P1 Triticum urartu|MYB|MYB family protein	296937	0	95.873	600.512	315	302
TRINITY_DN515124_c1_g1_i1	MYB	1308	gnl|BL_ORD_ID|104322Gh_D05G3059 Gossypium hirsutum|MYB_related|MYB_related family protein	104322	4.06785e-16	100	79.337	40	40
TRINITY_DN521088_c3_g4_i5	B3	2527	gnl|BL_ORD_ID|176973XP_009588506.1 Nicotiana tomentosiformis|B3|B3 family protein	176973	3.49827e-14	71.4286	75.8702	70	50
TRINITY_DN493944_c3_g1_i3	Nin-like	1719	gnl|BL_ORD_ID|316447Zmw_sc06576.1.g00010.1 Zoysia matrella|Nin-like|Nin-like family protein	316447	9.68802e-05	68	48.521	50	34
TRINITY_DN511468_c0_g1_i4	Trihelix	1927	gnl|BL_ORD_ID|5767Aco017242.1 Ananas comosus|Trihelix|Trihelix family protein	5767	6.30679e-09	41.958	62.3882	286	120
TRINITY_DN512821_c0_g1_i2	G2-like	2212	gnl|BL_ORD_ID|270782Sopen09g001330.1 Solanum pennellii|G2-like|G2-like family protein	270782	2.01986e-86	57.7281	294.278	537	310
TRINITY_DN206561_c0_g3_i1	ERF	479	gnl|BL_ORD_ID|296375TRIUR3_04273-P1 Triticum urartu|ERF|ERF family protein	296375	2.89351e-58	83.8235	193.356	136	114
TRINITY_DN458263_c0_g1_i3	ZF-HD	803	gnl|BL_ORD_ID|285254TRAES3BF070300020CFD_t1 Triticum aestivum|ZF-HD|ZF-HD family protein	285254	1.56623e-63	100	200.29	96	96
TRINITY_DN493944_c0_g1_i2	Nin-like	541	gnl|BL_ORD_ID|316447Zmw_sc06576.1.g00010.1 Zoysia matrella|Nin-like|Nin-like family protein	316447	1.8113e-06	59.6491	50.0618	57	34
TRINITY_DN515156_c1_g3_i19	G2-like	1292	gnl|BL_ORD_ID|40911XP_009123613.1 Brassica rapa|G2-like|G2-like family protein	40911	5.17344e-31	46.8254	126.331	252	118
TRINITY_DN517644_c2_g3_i2	M-type_MADS	2806	gnl|BL_ORD_ID|270653Sopen01g046240.1 Solanum pennellii|M-type_MADS|M-type_MADS family protein	270653	8.41205e-124	68.595	390.578	363	249
TRINITY_DN491682_c0_g1_i4	Dof	1662	gnl|BL_ORD_ID|20994EMT30398 Aegilops tauschii|Dof|Dof family protein	20994	7.58298e-93	93.1818	294.664	264	246
TRINITY_DN513542_c0_g3_i3	Trihelix	2844	gnl|BL_ORD_ID|294653Tp57577_TGAC_v2_mRNA3016 Trifolium pratense|Trihelix|Trihelix family protein	294653	2.47287e-18	64	88.9669	100	64
TRINITY_DN480731_c0_g1_i1	bHLH	1221	gnl|BL_ORD_ID|258360676732396 Sisymbrium irio|bHLH|bHLH family protein	258360	2.46338e-67	62.7615	228.024	239	150
TRINITY_DN500279_c0_g4_i9	BES1	427	gnl|BL_ORD_ID|246096RrC2092_p1 Raphanus raphanistrum|BES1|BES1 family protein	246096	8.77704e-41	67.6923	148.673	130	88
TRINITY_DN518537_c0_g3_i21	STAT	887	gnl|BL_ORD_ID|258064676709864 Sisymbrium irio|STAT|STAT family protein	258064	2.45265e-34	53.8776	137.502	245	132
TRINITY_DN473333_c0_g1_i1	E2F DP	647	gnl|BL_ORD_ID|192570OPUNC10G09700.4 Oryza punctata|E2F/DP|E2F/DP family protein	192570	6.03603e-18	65.3061	86.2705	98	64
TRINITY_DN512821_c0_g1_i3	G2-like	2937	gnl|BL_ORD_ID|270782Sopen09g001330.1 Solanum pennellii|G2-like|G2-like family protein	270782	6.86921e-78	58.5657	275.404	502	294
TRINITY_DN516667_c1_g2_i2	ARR-B	1330	gnl|BL_ORD_ID|103583Gh_D11G1176 Gossypium hirsutum|ARR-B|ARR-B family protein	103583	1.49339e-09	54.5455	62.7734	121	66
TRINITY_DN521088_c3_g4_i1	B3	2682	gnl|BL_ORD_ID|176973XP_009588506.1 Nicotiana tomentosiformis|B3|B3 family protein	176973	2.10707e-14	71.4286	76.6406	70	50
TRINITY_DN499267_c0_g5_i1	MYB	799	gnl|BL_ORD_ID|286573Traes_4AS_A79A68739.1 Triticum aestivum|MYB|MYB family protein	286573	3.88066e-115	100	338.576	200	200
TRINITY_DN488130_c1_g1_i8	G2-like	1779	gnl|BL_ORD_ID|40911XP_009123613.1 Brassica rapa|G2-like|G2-like family protein	40911	1.14418e-15	45.7895	82.4185	190	87
TRINITY_DN456302_c0_g2_i1	LBD	700	gnl|BL_ORD_ID|269669Sopen05g028040.1 Solanum pennellii|LBD|LBD family protein	269669	0.00424048	65.9091	41.2022	44	29
TRINITY_DN513362_c1_g2_i6	bHLH	2082	gnl|BL_ORD_ID|306934Zjn_sc00156.1.g00380.1.am.mk Zoysia japonica|bHLH|bHLH family protein	306934	1.15024e-22	73.4177	107.071	79	58
TRINITY_DN507251_c2_g3_i4	C2H2	1406	gnl|BL_ORD_ID|248379Rsa1.0_06664.1_g00001.1 Raphanus sativus|C2H2|C2H2 family protein	248379	3.51929e-33	67.9688	133.65	128	87
TRINITY_DN491682_c0_g1_i1	Dof	1767	gnl|BL_ORD_ID|286828Traes_5DL_C5D9E96D4.1 Triticum aestivum|Dof|Dof family protein	286828	2.26355e-123	97.6431	373.629	297	290
TRINITY_DN459972_c1_g1_i17	G2-like	908	gnl|BL_ORD_ID|106442Gh_A02G0666 Gossypium hirsutum|G2-like|G2-like family protein	106442	4.84089e-19	58.2677	90.8929	127	74
TRINITY_DN481450_c0_g1_i3	HB-other	900	gnl|BL_ORD_ID|98924mrna11429.1-v1.0-hybrid Fragaria vesca|HB-other|HB-other family protein	98924	6.1955e-126	86.5546	398.282	238	206
TRINITY_DN518537_c0_g3_i14	STAT	727	gnl|BL_ORD_ID|258064676709864 Sisymbrium irio|STAT|STAT family protein	258064	7.34902e-07	58.2278	52.7582	79	46
TRINITY_DN501969_c1_g1_i1	E2F DP	890	gnl|BL_ORD_ID|191089OPUNC10G09700.3 Oryza punctata|E2F/DP|E2F/DP family protein	191089	2.78951e-50	66.8896	184.496	299	200
TRINITY_DN518902_c2_g4_i13	bHLH	549	gnl|BL_ORD_ID|306934Zjn_sc00156.1.g00380.1.am.mk Zoysia japonica|bHLH|bHLH family protein	306934	1.38656e-28	75.3086	116.701	81	61
TRINITY_DN520904_c0_g1_i1	HB-other	214	gnl|BL_ORD_ID|98924mrna11429.1-v1.0-hybrid Fragaria vesca|HB-other|HB-other family protein	98924	7.29171e-36	88.7324	132.88	71	63
TRINITY_DN500309_c6_g3_i3	Nin-like	3222	gnl|BL_ORD_ID|20007XP_011400012.1 Auxenochlorella protothecoides|Nin-like|Nin-like family protein	20007	2.06494e-13	49.3671	76.6406	158	78
TRINITY_DN512972_c3_g1_i2	ARR-B	1416	gnl|BL_ORD_ID|20680EMT13304 Aegilops tauschii|ARR-B|ARR-B family protein	20680	2.60109e-129	96.2963	380.563	216	208
TRINITY_DN517270_c3_g1_i6	bZIP	1044	gnl|BL_ORD_ID|284817Traes_5BL_C08428870.1 Triticum aestivum|bZIP|bZIP family protein	284817	0	96.9231	551.206	325	315
TRINITY_DN481450_c0_g1_i4	HB-other	814	gnl|BL_ORD_ID|98924mrna11429.1-v1.0-hybrid Fragaria vesca|HB-other|HB-other family protein	98924	1.14658e-144	85.6089	447.973	271	232
TRINITY_DN426836_c0_g1_i1	B3	578	gnl|BL_ORD_ID|269752Sopen08g002450.1 Solanum pennellii|B3|B3 family protein	269752	2.18872e-20	52.0833	91.6633	144	75
TRINITY_DN514114_c2_g6_i10	HB-other	1628	gnl|BL_ORD_ID|296668TRIUR3_24308-P1 Triticum urartu|HB-other|HB-other family protein	296668	9.53351e-151	78.5276	446.817	326	256
TRINITY_DN456302_c0_g2_i2	LBD	755	gnl|BL_ORD_ID|269669Sopen05g028040.1 Solanum pennellii|LBD|LBD family protein	269669	0.00499787	65.9091	41.2022	44	29
TRINITY_DN491093_c1_g1_i3	G2-like	984	gnl|BL_ORD_ID|40911XP_009123613.1 Brassica rapa|G2-like|G2-like family protein	40911	3.02642e-26	50	110.923	218	109
TRINITY_DN503595_c1_g2_i10	G2-like	1074	gnl|BL_ORD_ID|40911XP_009123613.1 Brassica rapa|G2-like|G2-like family protein	40911	6.10062e-36	45.2599	139.813	327	148
TRINITY_DN509712_c5_g6_i3	E2F DP	554	gnl|BL_ORD_ID|191525OPUNC10G09700.1 Oryza punctata|E2F/DP|E2F/DP family protein	191525	4.3274e-49	72.4638	176.407	138	100
TRINITY_DN521114_c1_g1_i7	HB-other	2518	gnl|BL_ORD_ID|98924mrna11429.1-v1.0-hybrid Fragaria vesca|HB-other|HB-other family protein	98924	0	83.9623	997.653	636	534
TRINITY_DN480399_c0_g1_i1	MYB	1673	gnl|BL_ORD_ID|221015PSME_00044429-RA Pseudotsuga menziesii|MYB_related|MYB_related family protein	221015	8.20178e-09	66.2162	61.6178	74	49
TRINITY_DN518902_c2_g4_i18	bHLH	444	gnl|BL_ORD_ID|306934Zjn_sc00156.1.g00380.1.am.mk Zoysia japonica|bHLH|bHLH family protein	306934	2.98245e-16	75	79.337	60	45
TRINITY_DN518902_c2_g4_i8	bHLH	490	gnl|BL_ORD_ID|306934Zjn_sc00156.1.g00380.1.am.mk Zoysia japonica|bHLH|bHLH family protein	306934	1.28638e-30	73.3333	121.709	90	66
TRINITY_DN488130_c1_g1_i6	G2-like	2050	gnl|BL_ORD_ID|40911XP_009123613.1 Brassica rapa|G2-like|G2-like family protein	40911	1.55936e-24	60	109.768	150	90
TRINITY_DN509712_c5_g6_i1	E2F DP	838	gnl|BL_ORD_ID|191525OPUNC10G09700.1 Oryza punctata|E2F/DP|E2F/DP family protein	191525	9.23999e-47	72.7941	173.326	136	99
TRINITY_DN503595_c1_g1_i1	G2-like	628	gnl|BL_ORD_ID|40911XP_009123613.1 Brassica rapa|G2-like|G2-like family protein	40911	1.64882e-13	48	71.633	150	72
TRINITY_DN513542_c0_g3_i8	Trihelix	2771	gnl|BL_ORD_ID|294653Tp57577_TGAC_v2_mRNA3016 Trifolium pratense|Trihelix|Trihelix family protein	294653	2.36712e-18	64	88.9669	100	64
TRINITY_DN498959_c0_g3_i4	HB-other	1476	gnl|BL_ORD_ID|20408EMT32783 Aegilops tauschii|HB-other|HB-other family protein	20408	1.48338e-63	87.8049	208.764	123	108
TRINITY_DN521114_c1_g1_i5	HB-other	4058	gnl|BL_ORD_ID|98924mrna11429.1-v1.0-hybrid Fragaria vesca|HB-other|HB-other family protein	98924	0	87.5	842.417	504	441
TRINITY_DN488130_c1_g1_i5	G2-like	2131	gnl|BL_ORD_ID|40911XP_009123613.1 Brassica rapa|G2-like|G2-like family protein	40911	8.23429e-25	60	110.923	150	90
TRINITY_DN517644_c2_g3_i1	M-type_MADS	2191	gnl|BL_ORD_ID|270653Sopen01g046240.1 Solanum pennellii|M-type_MADS|M-type_MADS family protein	270653	1.82043e-127	69.4215	394.43	363	252
TRINITY_DN502122_c0_g1_i2	BBR-BPC	1406	gnl|BL_ORD_ID|97717FANhyb_rscf00000253.1.g00010.1 Fragaria x ananassa|BBR-BPC|BBR-BPC family protein	97717	9.72967e-45	60.6796	169.859	206	125
TRINITY_DN508148_c0_g1_i3	G2-like	283	gnl|BL_ORD_ID|40228XP_009123614.1 Brassica rapa|G2-like|G2-like family protein	40228	3.07963e-05	63.8889	44.2838	36	23
TRINITY_DN497970_c9_g2_i1	G2-like	1606	gnl|BL_ORD_ID|40911XP_009123613.1 Brassica rapa|G2-like|G2-like family protein	40911	8.22464e-08	48.9655	57.7658	145	71
TRINITY_DN481450_c0_g1_i1	HB-other	414	gnl|BL_ORD_ID|98924mrna11429.1-v1.0-hybrid Fragaria vesca|HB-other|HB-other family protein	98924	1.68954e-46	84.9462	166.777	93	79
TRINITY_DN500309_c6_g3_i5	Nin-like	3329	gnl|BL_ORD_ID|20007XP_011400012.1 Auxenochlorella protothecoides|Nin-like|Nin-like family protein	20007	9.7752e-13	57.6923	74.7146	104	60
TRINITY_DN513542_c0_g3_i5	Trihelix	2594	gnl|BL_ORD_ID|294653Tp57577_TGAC_v2_mRNA3016 Trifolium pratense|Trihelix|Trihelix family protein	294653	1.01815e-18	51.1765	89.7373	170	87
TRINITY_DN507821_c1_g9_i4	G2-like	631	gnl|BL_ORD_ID|245904RrC887_p5 Raphanus raphanistrum|G2-like|G2-like family protein	245904	1.08997e-05	51.2821	48.1358	78	40
TRINITY_DN491093_c1_g1_i1	G2-like	1340	gnl|BL_ORD_ID|40911XP_009123613.1 Brassica rapa|G2-like|G2-like family protein	40911	1.52082e-14	48.366	68.9366	153	74
TRINITY_DN497970_c9_g2_i3	G2-like	1493	gnl|BL_ORD_ID|40911XP_009123613.1 Brassica rapa|G2-like|G2-like family protein	40911	1.04899e-19	45.8861	94.3597	316	145
TRINITY_DN521114_c1_g1_i3	HB-other	2716	gnl|BL_ORD_ID|98924mrna11429.1-v1.0-hybrid Fragaria vesca|HB-other|HB-other family protein	98924	0	86.8365	783.867	471	409
TRINITY_DN518902_c2_g4_i4	bHLH	338	gnl|BL_ORD_ID|306934Zjn_sc00156.1.g00380.1.am.mk Zoysia japonica|bHLH|bHLH family protein	306934	1.12156e-22	75.6757	96.6709	74	56
TRINITY_DN521114_c1_g1_i11	HB-other	1209	gnl|BL_ORD_ID|98924mrna11429.1-v1.0-hybrid Fragaria vesca|HB-other|HB-other family protein	98924	7.60355e-163	86.0841	502.671	309	266
TRINITY_DN518902_c2_g10_i1	bHLH	325	gnl|BL_ORD_ID|306934Zjn_sc00156.1.g00380.1.am.mk Zoysia japonica|bHLH|bHLH family protein	306934	5.31654e-11	75.6098	62.3882	41	31
TRINITY_DN503595_c1_g1_i2	G2-like	1095	gnl|BL_ORD_ID|40911XP_009123613.1 Brassica rapa|G2-like|G2-like family protein	40911	3.00333e-36	45.5657	140.584	327	149
TRINITY_DN505493_c0_g1_i1	GeBP protein	1292	gnl|BL_ORD_ID|318638Zpz_sc00228.1.g00060.1.am.mk Zoysia pacifica|GeBP|GeBP family protein	318638	0.00025865	48.1013	46.595	79	38
TRINITY_DN481242_c0_g2_i1	C2H2	211	gnl|BL_ORD_ID|20208EMT09624 Aegilops tauschii|C2H2|C2H2 family protein	20208	1.03639e-14	89.7436	72.0182	39	35
TRINITY_DN496011_c1_g2_i3	C2H2	280	gnl|BL_ORD_ID|20208EMT09624 Aegilops tauschii|C2H2|C2H2 family protein	20208	2.44885e-15	87.1795	74.7146	39	34
TRINITY_DN523985_c18_g1_i2	NAC	9041	gnl|BL_ORD_ID|128048Itr_sc004419.1_g00003.1 Ipomoea trifida|NAC|NAC family protein	128048	9.22161e-106	45.0505	384.03	990	446
TRINITY_DN507478_c1_g1_i6	GRAS	1129	gnl|BL_ORD_ID|21269EMT21260 Aegilops tauschii|GRAS|GRAS family protein	21269	1.17155e-11	89.4737	61.6178	38	34
TRINITY_DN507478_c1_g1_i1	GRAS	1167	gnl|BL_ORD_ID|283519Traes_5BL_04BDEB5D8.2 Triticum aestivum|GRAS|GRAS family protein	283519	3.24344e-12	91.8919	61.6178	37	34
TRINITY_DN523807_c8_g1_i2	M-type_MADS	3683	gnl|BL_ORD_ID|270111Sopen06g019750.1 Solanum pennellii|M-type_MADS|M-type_MADS family protein	270111	3.4853e-62	44.6936	236.884	669	299
TRINITY_DN509875_c0_g2_i9	C2H2	2333	gnl|BL_ORD_ID|20208EMT09624 Aegilops tauschii|C2H2|C2H2 family protein	20208	5.29882e-16	87.5	85.8853	48	42
TRINITY_DN507478_c1_g1_i3	GRAS	561	gnl|BL_ORD_ID|21269EMT21260 Aegilops tauschii|GRAS|GRAS family protein	21269	3.16602e-12	89.4737	61.6178	38	34
TRINITY_DN461104_c0_g2_i6	MYB	761	gnl|BL_ORD_ID|185977KN539116.1_FGP007 Oryza longistaminata|MYB_related|MYB_related family protein	185977	6.87288e-23	90.9091	102.449	55	50
TRINITY_DN492549_c1_g4_i1	C2H2	258	gnl|BL_ORD_ID|20208EMT09624 Aegilops tauschii|C2H2|C2H2 family protein	20208	2.56336e-17	57.3034	80.1073	89	51
TRINITY_DN523376_c15_g1_i1	ERF	923	gnl|BL_ORD_ID|270781Sopen11g017580.1 Solanum pennellii|ERF|ERF family protein	270781	4.73235e-33	54.2056	134.035	214	116
TRINITY_DN460438_c3_g1_i1	FAR1	332	gnl|BL_ORD_ID|199065LOC_Os04g22990.1 Oryza sativa subsp. japonica|FAR1|FAR1 family protein	199065	6.27198e-22	66.3265	94.7449	98	65
TRINITY_DN518478_c20_g6_i6	TALE	1055	gnl|BL_ORD_ID|296344TRIUR3_30534-P1 Triticum urartu|TALE|TALE family protein	296344	8.02871e-66	90.1408	221.09	142	128
TRINITY_DN523447_c32_g11_i3	ERF	2177	gnl|BL_ORD_ID|270781Sopen11g017580.1 Solanum pennellii|ERF|ERF family protein	270781	0	73.9251	859.366	721	533
TRINITY_DN519463_c1_g2_i12	C2H2	1871	gnl|BL_ORD_ID|20208EMT09624 Aegilops tauschii|C2H2|C2H2 family protein	20208	3.39087e-07	83.3333	56.9954	36	30
TRINITY_DN523746_c144_g2_i4	FAR1	962	gnl|BL_ORD_ID|199065LOC_Os04g22990.1 Oryza sativa subsp. japonica|FAR1|FAR1 family protein	199065	2.82986e-117	72.1003	377.867	319	230
TRINITY_DN518920_c8_g4_i1	NAC	310	gnl|BL_ORD_ID|296962TRIUR3_25713-P1 Triticum urartu|NAC|NAC family protein	296962	3.57121e-12	79.5455	65.4698	44	35
TRINITY_DN519463_c1_g2_i8	C2H2	2441	gnl|BL_ORD_ID|20208EMT09624 Aegilops tauschii|C2H2|C2H2 family protein	20208	6.64063e-07	83.3333	56.6102	36	30
TRINITY_DN523617_c82_g3_i2	FAR1	2064	gnl|BL_ORD_ID|21158EMT21149 Aegilops tauschii|FAR1|FAR1 family protein	21158	0.00283955	55.3191	44.2838	47	26
TRINITY_DN467463_c8_g1_i1	FAR1	246	gnl|BL_ORD_ID|199065LOC_Os04g22990.1 Oryza sativa subsp. japonica|FAR1|FAR1 family protein	199065	5.05815e-13	59.2593	67.781	81	48
TRINITY_DN523687_c23_g1_i7	bZIP	2453	gnl|BL_ORD_ID|296500TRIUR3_08598-P1 Triticum urartu|bZIP|bZIP family protein	296500	7.00265e-14	64.6341	78.5666	82	53
TRINITY_DN523819_c55_g1_i2	M-type_MADS	3843	gnl|BL_ORD_ID|270111Sopen06g019750.1 Solanum pennellii|M-type_MADS|M-type_MADS family protein	270111	7.16831e-27	49.3151	122.865	292	144
TRINITY_DN495657_c3_g2_i8	M-type_MADS	606	gnl|BL_ORD_ID|198356LOC_Os11g12360.1 Oryza sativa subsp. japonica|M-type_MADS|M-type_MADS family protein	198356	9.39815e-32	71.5909	127.102	88	63
TRINITY_DN497173_c5_g10_i1	NAC	203	gnl|BL_ORD_ID|128048Itr_sc004419.1_g00003.1 Ipomoea trifida|NAC|NAC family protein	128048	0.0103009	58.209	36.1946	67	39
TRINITY_DN494078_c2_g6_i1	FAR1	283	gnl|BL_ORD_ID|21158EMT21149 Aegilops tauschii|FAR1|FAR1 family protein	21158	0.00889225	52.381	25.409	42	22
TRINITY_DN523954_c25_g5_i1	M-type_MADS	2107	gnl|BL_ORD_ID|270111Sopen06g019750.1 Solanum pennellii|M-type_MADS|M-type_MADS family protein	270111	3.43599e-61	50.2304	227.639	434	218
TRINITY_DN523914_c34_g5_i1	NAC	677	gnl|BL_ORD_ID|296685TRIUR3_29857-P1 Triticum urartu|NAC|NAC family protein	296685	3.81937e-34	90.1786	131.724	112	101
TRINITY_DN515777_c10_g8_i7	C2H2	459	gnl|BL_ORD_ID|50796XP_012575683.1 Cicer arietinum|C2H2|C2H2 family protein	50796	2.45772e-06	70	49.2914	40	28
TRINITY_DN523914_c32_g10_i1	G2-like	206	gnl|BL_ORD_ID|97663FANhyb_rscf00000398.1.g00005.1 Fragaria x ananassa|G2-like|G2-like family protein	97663	1.76548e-11	69.0909	62.3882	55	38
TRINITY_DN523726_c6_g1_i1	GRAS	709	gnl|BL_ORD_ID|20915EMT12179 Aegilops tauschii|GRAS|GRAS family protein	20915	1.81246e-41	79	149.058	100	79
TRINITY_DN523915_c8_g1_i4	B3	3318	gnl|BL_ORD_ID|250260Rsa1.0_00333.1_g00003.1 Raphanus sativus|B3|B3 family protein	250260	5.01825e-36	40.884	151.754	543	222
TRINITY_DN475314_c40_g15_i1	MYB	286	gnl|BL_ORD_ID|20470EMT24918 Aegilops tauschii|MYB_related|MYB_related family protein	20470	1.07627e-09	86.1111	58.151	36	31
TRINITY_DN523746_c144_g1_i5	NAC	1798	gnl|BL_ORD_ID|128048Itr_sc004419.1_g00003.1 Ipomoea trifida|NAC|NAC family protein	128048	8.62399e-73	47.0199	260.766	604	284
TRINITY_DN514558_c12_g10_i3	FAR1	290	gnl|BL_ORD_ID|199065LOC_Os04g22990.1 Oryza sativa subsp. japonica|FAR1|FAR1 family protein	199065	1.06988e-05	56.8182	46.2098	88	50
TRINITY_DN501584_c10_g4_i2	TALE	632	gnl|BL_ORD_ID|21193EMT16587 Aegilops tauschii|TALE|TALE family protein	21193	7.55382e-20	93.3333	79.7221	45	42
TRINITY_DN523889_c4_g3_i4	ERF	2477	gnl|BL_ORD_ID|258938676725400 Sisymbrium irio|ERF|ERF family protein	258938	3.95614e-27	53.9823	122.479	226	122
TRINITY_DN500023_c66_g19_i1	ZF-HD	212	gnl|BL_ORD_ID|269698Sopen05g016700.1 Solanum pennellii|ZF-HD|ZF-HD family protein	269698	8.65199e-15	66.6667	72.4034	69	46
TRINITY_DN523916_c7_g3_i2	M-type_MADS	1194	gnl|BL_ORD_ID|198356LOC_Os11g12360.1 Oryza sativa subsp. japonica|M-type_MADS|M-type_MADS family protein	198356	7.96095e-61	53.6388	219.164	371	199
TRINITY_DN523402_c11_g5_i1	M-type_MADS	574	gnl|BL_ORD_ID|198356LOC_Os11g12360.1 Oryza sativa subsp. japonica|M-type_MADS|M-type_MADS family protein	198356	6.94984e-14	70.1493	73.559	67	47
TRINITY_DN497173_c5_g3_i3	NAC	221	gnl|BL_ORD_ID|128048Itr_sc004419.1_g00003.1 Ipomoea trifida|NAC|NAC family protein	128048	2.1331e-05	63.9344	44.669	61	39
TRINITY_DN522592_c0_g1_i6	CPP	840	gnl|BL_ORD_ID|32822GSBRNA2T00132210001 Brassica napus|CPP|CPP family protein	32822	1.50318e-15	63.6364	80.1073	110	70
TRINITY_DN475314_c40_g9_i2	MYB	335	gnl|BL_ORD_ID|20470EMT24918 Aegilops tauschii|MYB_related|MYB_related family protein	20470	3.05269e-08	83.3333	54.299	36	30
TRINITY_DN494239_c1_g1_i5	LBD	238	gnl|BL_ORD_ID|269669Sopen05g028040.1 Solanum pennellii|LBD|LBD family protein	269669	2.43667e-09	53.75	56.6102	80	43
TRINITY_DN522198_c15_g2_i2	TALE	558	gnl|BL_ORD_ID|21193EMT16587 Aegilops tauschii|TALE|TALE family protein	21193	0.0421889	50	37.3502	50	25
TRINITY_DN512882_c11_g6_i2	NAC	326	gnl|BL_ORD_ID|128048Itr_sc004419.1_g00003.1 Ipomoea trifida|NAC|NAC family protein	128048	2.30429e-13	61.0526	69.707	95	58
TRINITY_DN448707_c0_g2_i1	ZF-HD	215	gnl|BL_ORD_ID|269698Sopen05g016700.1 Solanum pennellii|ZF-HD|ZF-HD family protein	269698	6.6745e-06	57.1429	46.2098	63	36
TRINITY_DN513433_c1_g1_i1	M-type_MADS	634	gnl|BL_ORD_ID|198356LOC_Os11g12360.1 Oryza sativa subsp. japonica|M-type_MADS|M-type_MADS family protein	198356	5.13197e-76	81.768	255.373	181	148
TRINITY_DN523986_c6_g4_i1	MYB	566	gnl|BL_ORD_ID|296956TRIUR3_33813-P1 Triticum urartu|MYB_related|MYB_related family protein	296956	5.65994e-23	96	89.7373	50	48
TRINITY_DN523569_c22_g5_i1	M-type_MADS	2630	gnl|BL_ORD_ID|198356LOC_Os11g12360.1 Oryza sativa subsp. japonica|M-type_MADS|M-type_MADS family protein	198356	6.02712e-152	59.7464	498.819	631	377
TRINITY_DN520815_c26_g21_i2	GeBP protein	628	gnl|BL_ORD_ID|20456EMT30498 Aegilops tauschii|GeBP|GeBP family protein	20456	1.0161e-51	89.1089	177.948	101	90
TRINITY_DN522727_c44_g18_i4	ERF	2799	gnl|BL_ORD_ID|270781Sopen11g017580.1 Solanum pennellii|ERF|ERF family protein	270781	1.28135e-12	41.5344	75.485	378	157
TRINITY_DN234927_c0_g2_i1	YABBY	277	gnl|BL_ORD_ID|258264676791140 Sisymbrium irio|YABBY|YABBY family protein	258264	9.07999e-34	82.2222	125.561	90	74
TRINITY_DN425394_c0_g2_i1	G2-like	215	gnl|BL_ORD_ID|297310TRIUR3_32904-P1 Triticum urartu|G2-like|G2-like family protein	297310	0.000440805	71.0526	40.4318	38	27
TRINITY_DN479069_c4_g3_i7	FAR1	698	gnl|BL_ORD_ID|195432BGIOSGA015399-PA Oryza sativa subsp. indica|FAR1|FAR1 family protein	195432	0.000158644	56	45.4394	75	42
TRINITY_DN521689_c9_g16_i3	HD-ZIP	545	gnl|BL_ORD_ID|269681Sopen09g021360.1 Solanum pennellii|HD-ZIP|HD-ZIP family protein	269681	1.63769e-12	52.4138	69.3218	145	76
TRINITY_DN494239_c1_g4_i1	HD-ZIP	210	gnl|BL_ORD_ID|74456PK03054.1 Cannabis sativa|HD-ZIP|HD-ZIP family protein	74456	6.55112e-08	62.3188	51.9878	69	43
TRINITY_DN465143_c0_g1_i4	C2H2	1382	gnl|BL_ORD_ID|160147Mapoly0088s0065.1.p Marchantia polymorpha|C2H2|C2H2 family protein	160147	1.27781e-12	61.1111	73.1738	72	44
TRINITY_DN523976_c8_g1_i4	LBD	1698	gnl|BL_ORD_ID|126762Itr_sc000159.1_g00052.1 Ipomoea trifida|LBD|LBD family protein	126762	1.0471e-119	65.5	392.889	400	262
TRINITY_DN523856_c12_g4_i2	WOX	240	gnl|BL_ORD_ID|209209PDK_30s988751g003 Phoenix dactylifera|WOX|WOX family protein	209209	1.20334e-14	61.25	71.633	80	49
TRINITY_DN520833_c13_g7_i1	B3	316	gnl|BL_ORD_ID|20494EMT26093 Aegilops tauschii|B3|B3 family protein	20494	2.94385e-30	85.7143	118.242	70	60
TRINITY_DN523376_c15_g10_i2	ERF	380	gnl|BL_ORD_ID|270781Sopen11g017580.1 Solanum pennellii|ERF|ERF family protein	270781	1.83218e-44	76.1905	160.229	126	96
TRINITY_DN523428_c65_g1_i3	LBD	4367	gnl|BL_ORD_ID|250519Rsa1.0_02878.1_g00005.1 Raphanus sativus|LBD|LBD family protein	250519	7.76544e-176	52.5214	574.704	1051	552
TRINITY_DN337487_c0_g1_i1	ZF-HD	203	gnl|BL_ORD_ID|269698Sopen05g016700.1 Solanum pennellii|ZF-HD|ZF-HD family protein	269698	2.0523e-30	89.5522	117.472	67	60
TRINITY_DN520833_c13_g4_i1	LBD	635	gnl|BL_ORD_ID|126762Itr_sc000159.1_g00052.1 Ipomoea trifida|LBD|LBD family protein	126762	2.35416e-25	64.9635	108.612	137	89
TRINITY_DN413078_c2_g3_i3	MYB	252	gnl|BL_ORD_ID|20116EMT06416 Aegilops tauschii|MYB|MYB family protein	20116	4.47686e-07	56.8627	48.9062	51	29
TRINITY_DN494078_c2_g14_i1	WRKY	264	gnl|BL_ORD_ID|248470Rsa1.0_01894.1_g00003.1 Raphanus sativus|WRKY|WRKY family protein	248470	0.0385261	42.6471	35.039	68	29
TRINITY_DN523396_c11_g7_i2	TCP	1106	gnl|BL_ORD_ID|270237Sopen12g015990.1 Solanum pennellii|TCP|TCP family protein	270237	2.54855e-131	70.6522	420.239	368	260
TRINITY_DN523941_c4_g1_i2	TCP	4748	gnl|BL_ORD_ID|270237Sopen12g015990.1 Solanum pennellii|TCP|TCP family protein	270237	2.71446e-45	72.5714	183.726	175	127
TRINITY_DN523889_c4_g2_i2	HB-other	1661	gnl|BL_ORD_ID|197435LOC_Os05g25600.1 Oryza sativa subsp. japonica|HB-other|HB-other family protein	197435	9.77624e-17	54.2636	86.6557	129	70
TRINITY_DN487438_c6_g19_i1	MYB	552	gnl|BL_ORD_ID|20187EMT20255 Aegilops tauschii|MYB|MYB family protein	20187	1.40519e-16	59.375	78.9518	96	57
TRINITY_DN465143_c0_g1_i3	C2H2	1356	gnl|BL_ORD_ID|160147Mapoly0088s0065.1.p Marchantia polymorpha|C2H2|C2H2 family protein	160147	1.13451e-12	61.1111	73.1738	72	44
TRINITY_DN513514_c1_g2_i2	ERF	2253	gnl|BL_ORD_ID|270781Sopen11g017580.1 Solanum pennellii|ERF|ERF family protein	270781	0	73.7057	831.247	734	541
TRINITY_DN9094_c0_g1_i1	FAR1	217	gnl|BL_ORD_ID|199065LOC_Os04g22990.1 Oryza sativa subsp. japonica|FAR1|FAR1 family protein	199065	3.82007e-27	77.4648	108.227	71	55
TRINITY_DN337487_c0_g2_i1	ZF-HD	248	gnl|BL_ORD_ID|269698Sopen05g016700.1 Solanum pennellii|ZF-HD|ZF-HD family protein	269698	4.31824e-30	80	117.087	80	64
TRINITY_DN523914_c34_g6_i2	LBD	1924	gnl|BL_ORD_ID|250519Rsa1.0_02878.1_g00005.1 Raphanus sativus|LBD|LBD family protein	250519	1.27752e-52	46.875	200.675	384	180
TRINITY_DN454547_c1_g1_i1	MYB	302	gnl|BL_ORD_ID|20187EMT20255 Aegilops tauschii|MYB|MYB family protein	20187	7.23112e-15	62.3188	71.633	69	43
TRINITY_DN489661_c3_g5_i1	HD-ZIP	213	gnl|BL_ORD_ID|269681Sopen09g021360.1 Solanum pennellii|HD-ZIP|HD-ZIP family protein	269681	2.18408e-24	81.4286	100.138	70	57
TRINITY_DN486801_c5_g1_i1	FAR1	236	gnl|BL_ORD_ID|199065LOC_Os04g22990.1 Oryza sativa subsp. japonica|FAR1|FAR1 family protein	199065	0.000453326	59.7222	40.817	72	43
TRINITY_DN523959_c5_g2_i3	M-type_MADS	1682	gnl|BL_ORD_ID|198356LOC_Os11g12360.1 Oryza sativa subsp. japonica|M-type_MADS|M-type_MADS family protein	198356	5.61427e-06	40.5405	52.7582	148	60
TRINITY_DN519773_c22_g22_i1	MYB	555	gnl|BL_ORD_ID|20477EMT24643 Aegilops tauschii|MYB_related|MYB_related family protein	20477	6.15424e-16	91.0714	79.337	56	51
TRINITY_DN480346_c6_g2_i3	FAR1	371	gnl|BL_ORD_ID|199065LOC_Os04g22990.1 Oryza sativa subsp. japonica|FAR1|FAR1 family protein	199065	8.75844e-25	74.5098	103.605	102	76
TRINITY_DN492456_c1_g1_i3	B3	614	gnl|BL_ORD_ID|269752Sopen08g002450.1 Solanum pennellii|B3|B3 family protein	269752	1.76523e-21	57.3643	95.1301	129	74
TRINITY_DN496806_c19_g12_i2	GRAS	569	gnl|BL_ORD_ID|20915EMT12179 Aegilops tauschii|GRAS|GRAS family protein	20915	1.99817e-31	93.617	83.1889	47	44
TRINITY_DN476177_c7_g1_i10	FAR1	361	gnl|BL_ORD_ID|199065LOC_Os04g22990.1 Oryza sativa subsp. japonica|FAR1|FAR1 family protein	199065	3.13742e-49	79.646	174.096	113	90
TRINITY_DN507754_c10_g6_i1	B3	869	gnl|BL_ORD_ID|296246TRIUR3_32580-P1 Triticum urartu|B3|B3 family protein	296246	1.37436e-24	61.2245	104.375	147	90
TRINITY_DN407165_c1_g4_i2	FAR1	218	gnl|BL_ORD_ID|199065LOC_Os04g22990.1 Oryza sativa subsp. japonica|FAR1|FAR1 family protein	199065	3.66656e-09	52.1127	55.8398	71	37
TRINITY_DN523813_c70_g4_i1	FAR1	291	gnl|BL_ORD_ID|199065LOC_Os04g22990.1 Oryza sativa subsp. japonica|FAR1|FAR1 family protein	199065	5.25026e-31	70.8333	120.553	96	68
TRINITY_DN522104_c47_g6_i10	Dof	387	gnl|BL_ORD_ID|314009Zmw_sc00634.1.g00020.1 Zoysia matrella|Dof|Dof family protein	314009	3.04849e-08	54.6512	54.6842	86	47
TRINITY_DN523856_c12_g4_i4	MIKC_MADS	284	gnl|BL_ORD_ID|129813Jcr4S00018.10 Jatropha curcas|MIKC_MADS|MIKC_MADS family protein	129813	1.53817e-09	53.1915	57.7658	94	50
TRINITY_DN522695_c5_g3_i1	ZF-HD	213	gnl|BL_ORD_ID|269698Sopen05g016700.1 Solanum pennellii|ZF-HD|ZF-HD family protein	269698	8.52204e-27	81.4286	107.071	70	57
TRINITY_DN622759_c0_g1_i1	CAMTA	332	gnl|BL_ORD_ID|144671Lsa011807 Lactuca sativa|CAMTA|CAMTA family protein	144671	0.0210356	54.7619	36.1946	42	23
TRINITY_DN523228_c8_g1_i11	WRKY	849	gnl|BL_ORD_ID|216534PH01000906G0240 Phyllostachys heterocycla|WRKY|WRKY family protein	216534	0.000709529	57.8125	43.8986	64	37
TRINITY_DN373652_c0_g2_i2	ZF-HD	216	gnl|BL_ORD_ID|269698Sopen05g016700.1 Solanum pennellii|ZF-HD|ZF-HD family protein	269698	2.28596e-23	81.6901	97.4413	71	58
TRINITY_DN437131_c0_g1_i1	NAC	952	gnl|BL_ORD_ID|21384EMT21706 Aegilops tauschii|NAC|NAC family protein	21384	6.59137e-11	42.4658	66.2402	219	93
TRINITY_DN520833_c13_g5_i2	WRKY	586	gnl|BL_ORD_ID|250373Rsa1.0_07654.1_g00001.1 Raphanus sativus|WRKY|WRKY family protein	250373	7.67498e-48	59.7938	172.94	194	116
TRINITY_DN523376_c15_g10_i1	ERF	345	gnl|BL_ORD_ID|270781Sopen11g017580.1 Solanum pennellii|ERF|ERF family protein	270781	1.67428e-45	80.531	162.54	113	91
TRINITY_DN479844_c16_g2_i7	NAC	501	gnl|BL_ORD_ID|20708EMT33859 Aegilops tauschii|NAC|NAC family protein	20708	3.45363e-09	62.069	58.151	58	36
TRINITY_DN414476_c0_g4_i1	ZF-HD	209	gnl|BL_ORD_ID|269698Sopen05g016700.1 Solanum pennellii|ZF-HD|ZF-HD family protein	269698	2.13567e-21	74.2424	91.6633	66	49
TRINITY_DN522880_c20_g1_i3	WRKY	667	gnl|BL_ORD_ID|296850TRIUR3_21738-P1 Triticum urartu|WRKY|WRKY family protein	296850	9.65932e-24	86.1538	98.9821	65	56
TRINITY_DN515317_c40_g3_i7	MYB	589	gnl|BL_ORD_ID|20187EMT20255 Aegilops tauschii|MYB|MYB family protein	20187	1.07773e-27	70.7071	110.923	99	70
TRINITY_DN186563_c0_g1_i1	B3	290	gnl|BL_ORD_ID|20133EMT29641 Aegilops tauschii|B3|B3 family protein	20133	9.50896e-35	95.1613	130.954	62	59
TRINITY_DN462334_c0_g2_i4	M-type_MADS	376	gnl|BL_ORD_ID|198356LOC_Os11g12360.1 Oryza sativa subsp. japonica|M-type_MADS|M-type_MADS family protein	198356	1.08405e-63	88.5246	215.698	122	108
TRINITY_DN468881_c0_g1_i1	M-type_MADS	322	gnl|BL_ORD_ID|198356LOC_Os11g12360.1 Oryza sativa subsp. japonica|M-type_MADS|M-type_MADS family protein	198356	7.81444e-09	51.8868	56.225	106	55
TRINITY_DN455931_c7_g6_i9	FAR1	215	gnl|BL_ORD_ID|21158EMT21149 Aegilops tauschii|FAR1|FAR1 family protein	21158	2.42381e-22	83.3333	93.5893	60	50
TRINITY_DN429337_c1_g1_i2	MYB	212	gnl|BL_ORD_ID|128501Itr_sc001764.1_g00003.1 Ipomoea trifida|MYB_related|MYB_related family protein	128501	1.63705e-12	63.7681	65.4698	69	44
TRINITY_DN497884_c20_g1_i1	B3	659	gnl|BL_ORD_ID|20166EMT01685 Aegilops tauschii|B3|B3 family protein	20166	3.14475e-05	55.5556	47.3654	54	30
TRINITY_DN464384_c12_g9_i1	NAC	254	gnl|BL_ORD_ID|296846TRIUR3_11787-P1 Triticum urartu|NAC|NAC family protein	296846	1.09582e-09	81.0811	57.3806	37	30
TRINITY_DN523914_c34_g4_i2	G2-like	883	gnl|BL_ORD_ID|269967Sopen02g025440.1 Solanum pennellii|G2-like|G2-like family protein	269967	1.73296e-09	39.3103	61.6178	290	114
TRINITY_DN491806_c4_g6_i5	TCP	440	gnl|BL_ORD_ID|270237Sopen12g015990.1 Solanum pennellii|TCP|TCP family protein	270237	1.71651e-36	62.0482	138.658	166	103
TRINITY_DN314529_c0_g1_i1	ZF-HD	213	gnl|BL_ORD_ID|269698Sopen05g016700.1 Solanum pennellii|ZF-HD|ZF-HD family protein	269698	9.12003e-32	88.5714	121.324	70	62
TRINITY_DN479069_c4_g3_i6	FAR1	616	gnl|BL_ORD_ID|199304LOC_Os02g16240.1 Oryza sativa subsp. japonica|FAR1|FAR1 family protein	199304	3.10744e-08	57.3171	55.8398	82	47
TRINITY_DN474059_c9_g11_i2	G2-like	256	gnl|BL_ORD_ID|296938TRIUR3_23402-P1 Triticum urartu|G2-like|G2-like family protein	296938	0.0159816	56	35.8094	50	28
TRINITY_DN466814_c3_g2_i1	WRKY	465	gnl|BL_ORD_ID|250373Rsa1.0_07654.1_g00001.1 Raphanus sativus|WRKY|WRKY family protein	250373	8.40201e-27	56.6176	110.538	136	77
TRINITY_DN364154_c0_g2_i1	ZF-HD	228	gnl|BL_ORD_ID|269698Sopen05g016700.1 Solanum pennellii|ZF-HD|ZF-HD family protein	269698	6.28301e-27	82.6667	107.842	75	62
TRINITY_DN341217_c0_g1_i2	FAR1	241	gnl|BL_ORD_ID|199065LOC_Os04g22990.1 Oryza sativa subsp. japonica|FAR1|FAR1 family protein	199065	0.000303196	58	41.5874	50	29
TRINITY_DN475796_c30_g4_i1	HD-ZIP	321	gnl|BL_ORD_ID|313067Zosma57g00400.1 Zostera marina|HD-ZIP|HD-ZIP family protein	313067	0.0277194	58.6957	35.8094	46	27
TRINITY_DN523420_c3_g1_i1	M-type_MADS	249	gnl|BL_ORD_ID|198356LOC_Os11g12360.1 Oryza sativa subsp. japonica|M-type_MADS|M-type_MADS family protein	198356	9.05268e-25	72.2892	101.679	83	60
TRINITY_DN480346_c6_g12_i2	NAC	218	gnl|BL_ORD_ID|128048Itr_sc004419.1_g00003.1 Ipomoea trifida|NAC|NAC family protein	128048	1.87539e-10	64.5161	59.6918	62	40
TRINITY_DN407576_c0_g2_i2	TCP	209	gnl|BL_ORD_ID|270237Sopen12g015990.1 Solanum pennellii|TCP|TCP family protein	270237	3.46441e-24	75.3623	99.3673	69	52
TRINITY_DN519773_c22_g2_i1	MYB	684	gnl|BL_ORD_ID|20477EMT24643 Aegilops tauschii|MYB_related|MYB_related family protein	20477	7.61578e-28	88.3721	115.931	86	76
TRINITY_DN439852_c0_g1_i1	MIKC_MADS	235	gnl|BL_ORD_ID|129813Jcr4S00018.10 Jatropha curcas|MIKC_MADS|MIKC_MADS family protein	129813	2.99087e-07	52.6316	50.447	57	30
TRINITY_DN405573_c0_g1_i2	NF-YB	215	gnl|BL_ORD_ID|296864TRIUR3_11916-P1 Triticum urartu|NF-YB|NF-YB family protein	296864	4.84721e-17	82.9268	76.2554	41	34
TRINITY_DN523829_c2_g1_i3	B3	2927	gnl|BL_ORD_ID|250260Rsa1.0_00333.1_g00003.1 Raphanus sativus|B3|B3 family protein	250260	1.18795e-30	40.8867	134.035	609	249
TRINITY_DN460553_c0_g3_i1	M-type_MADS	220	gnl|BL_ORD_ID|198356LOC_Os11g12360.1 Oryza sativa subsp. japonica|M-type_MADS|M-type_MADS family protein	198356	5.22805e-23	73.4177	96.2857	79	58
TRINITY_DN519714_c1_g1_i1	TCP	1930	gnl|BL_ORD_ID|269425Sopen05g005700.1 Solanum pennellii|TCP|TCP family protein	269425	1.92908e-120	63.466	394.43	427	271
TRINITY_DN523814_c5_g4_i1	C2H2	995	gnl|BL_ORD_ID|187357OMERI11G10370.1 Oryza meridionalis|C2H2|C2H2 family protein	187357	1.50235e-57	58.8235	206.838	289	170
TRINITY_DN308612_c0_g3_i1	HD-ZIP	214	gnl|BL_ORD_ID|217498PH01000841G0210 Phyllostachys heterocycla|HD-ZIP|HD-ZIP family protein	217498	5.88501e-07	63.1579	49.2914	57	36
TRINITY_DN523759_c15_g1_i3	HD-ZIP	356	gnl|BL_ORD_ID|269681Sopen09g021360.1 Solanum pennellii|HD-ZIP|HD-ZIP family protein	269681	7.1567e-43	77.1186	155.606	118	91
TRINITY_DN445566_c7_g4_i1	MYB	246	gnl|BL_ORD_ID|131894kfl00937_0030 Klebsormidium flaccidum|MYB|MYB family protein	131894	0.000265407	50.7042	41.5874	71	36
TRINITY_DN523394_c21_g1_i1	TCP	3343	gnl|BL_ORD_ID|270237Sopen12g015990.1 Solanum pennellii|TCP|TCP family protein	270237	6.6348e-110	50	384.03	722	361
TRINITY_DN407433_c4_g1_i1	NAC	240	gnl|BL_ORD_ID|128048Itr_sc004419.1_g00003.1 Ipomoea trifida|NAC|NAC family protein	128048	2.40818e-10	62.3188	59.6918	69	43
TRINITY_DN522695_c5_g4_i4	ZF-HD	259	gnl|BL_ORD_ID|269698Sopen05g016700.1 Solanum pennellii|ZF-HD|ZF-HD family protein	269698	3.05565e-26	76.1905	106.301	84	64
TRINITY_DN504384_c47_g28_i1	G2-like	2096	gnl|BL_ORD_ID|269967Sopen02g025440.1 Solanum pennellii|G2-like|G2-like family protein	269967	2.38096e-31	51.0204	134.035	294	150
TRINITY_DN520833_c13_g5_i1	C2H2	306	gnl|BL_ORD_ID|50796XP_012575683.1 Cicer arietinum|C2H2|C2H2 family protein	50796	6.28457e-35	81.4433	130.954	97	79
TRINITY_DN185010_c1_g1_i2	NAC	202	gnl|BL_ORD_ID|296846TRIUR3_11787-P1 Triticum urartu|NAC|NAC family protein	296846	1.39973e-27	83.871	106.301	62	52
TRINITY_DN349561_c0_g1_i1	MYB	251	gnl|BL_ORD_ID|20187EMT20255 Aegilops tauschii|MYB|MYB family protein	20187	5.07955e-37	84.8101	131.724	79	67
TRINITY_DN521689_c9_g13_i1	TCP	392	gnl|BL_ORD_ID|270237Sopen12g015990.1 Solanum pennellii|TCP|TCP family protein	270237	0.00452656	65.7895	38.891	38	25
TRINITY_DN464368_c6_g8_i1	FAR1	324	gnl|BL_ORD_ID|199065LOC_Os04g22990.1 Oryza sativa subsp. japonica|FAR1|FAR1 family protein	199065	0.012141	58.4416	36.965	77	45
TRINITY_DN432747_c2_g1_i1	NAC	241	gnl|BL_ORD_ID|128048Itr_sc004419.1_g00003.1 Ipomoea trifida|NAC|NAC family protein	128048	1.68659e-13	64.4737	68.9366	76	49
TRINITY_DN491070_c10_g10_i1	FAR1	230	gnl|BL_ORD_ID|199065LOC_Os04g22990.1 Oryza sativa subsp. japonica|FAR1|FAR1 family protein	199065	2.86124e-21	71.6216	91.2781	74	53
TRINITY_DN523630_c6_g4_i6	NAC	210	gnl|BL_ORD_ID|125696MLOC_75795.5 Hordeum vulgare|NAC|NAC family protein	125696	1.26334e-20	71.0145	85.1149	69	49
TRINITY_DN522592_c0_g1_i9	CPP	941	gnl|BL_ORD_ID|32822GSBRNA2T00132210001 Brassica napus|CPP|CPP family protein	32822	4.76814e-13	69.2308	72.7886	65	45
TRINITY_DN454545_c2_g1_i2	ZF-HD	319	gnl|BL_ORD_ID|269698Sopen05g016700.1 Solanum pennellii|ZF-HD|ZF-HD family protein	269698	5.25587e-05	66.6667	44.2838	42	28
TRINITY_DN523976_c8_g1_i3	LBD	5039	gnl|BL_ORD_ID|126762Itr_sc000159.1_g00052.1 Ipomoea trifida|LBD|LBD family protein	126762	5.15331e-111	65.5	392.889	400	262
TRINITY_DN504384_c47_g21_i2	G2-like	461	gnl|BL_ORD_ID|297310TRIUR3_32904-P1 Triticum urartu|G2-like|G2-like family protein	297310	0.0341334	65.7143	36.5798	35	23
TRINITY_DN491100_c11_g10_i1	FAR1	313	gnl|BL_ORD_ID|199065LOC_Os04g22990.1 Oryza sativa subsp. japonica|FAR1|FAR1 family protein	199065	4.36585e-29	68.932	115.161	103	71
TRINITY_DN400296_c0_g1_i1	ZF-HD	215	gnl|BL_ORD_ID|269698Sopen05g016700.1 Solanum pennellii|ZF-HD|ZF-HD family protein	269698	5.53662e-32	88.7324	122.094	71	63
TRINITY_DN476935_c0_g3_i2	M-type_MADS	530	gnl|BL_ORD_ID|198356LOC_Os11g12360.1 Oryza sativa subsp. japonica|M-type_MADS|M-type_MADS family protein	198356	5.80962e-81	81.25	267.7	176	143
TRINITY_DN491806_c4_g6_i1	ERF	290	gnl|BL_ORD_ID|291652XP_010556248.1 Tarenaya hassleriana|ERF|ERF family protein	291652	5.05475e-40	86.4583	145.976	96	83
TRINITY_DN521195_c1_g7_i2	M-type_MADS	477	gnl|BL_ORD_ID|198356LOC_Os11g12360.1 Oryza sativa subsp. japonica|M-type_MADS|M-type_MADS family protein	198356	3.63233e-31	63.3588	123.635	131	83
TRINITY_DN474576_c3_g7_i1	TCP	342	gnl|BL_ORD_ID|269425Sopen05g005700.1 Solanum pennellii|TCP|TCP family protein	269425	2.46817e-09	55.6962	57.7658	79	44
TRINITY_DN479455_c7_g5_i10	NAC	319	gnl|BL_ORD_ID|128048Itr_sc004419.1_g00003.1 Ipomoea trifida|NAC|NAC family protein	128048	6.68289e-16	68.4932	77.0258	73	50
TRINITY_DN483878_c2_g9_i2	G2-like	284	gnl|BL_ORD_ID|269967Sopen02g025440.1 Solanum pennellii|G2-like|G2-like family protein	269967	5.97803e-06	53.2609	46.9802	92	49
TRINITY_DN465958_c1_g1_i12	NAC	261	gnl|BL_ORD_ID|128048Itr_sc004419.1_g00003.1 Ipomoea trifida|NAC|NAC family protein	128048	8.0897e-13	64.1026	67.3958	78	50
TRINITY_DN487790_c0_g1_i2	WRKY	222	gnl|BL_ORD_ID|194964ORUFI08G06360.1 Oryza rufipogon|WRKY|WRKY family protein	194964	0.000145801	67.5	42.3578	40	27
TRINITY_DN474002_c5_g3_i1	HD-ZIP	243	gnl|BL_ORD_ID|82545Dca2137.1 Dianthus caryophyllus|HD-ZIP|HD-ZIP family protein	82545	5.73111e-39	94.9367	140.969	79	75
TRINITY_DN480768_c4_g6_i1	FAR1	214	gnl|BL_ORD_ID|81473Dca46628.1 Dianthus caryophyllus|FAR1|FAR1 family protein	81473	4.6068e-16	61.4286	73.559	70	43
TRINITY_DN733221_c0_g1_i1	GRF	305	gnl|BL_ORD_ID|314578Zmw_sc02702.1.g00020.1 Zoysia matrella|GRF|GRF family protein	314578	0.0442178	49.2754	35.039	69	34
TRINITY_DN486801_c5_g2_i1	FAR1	289	gnl|BL_ORD_ID|199065LOC_Os04g22990.1 Oryza sativa subsp. japonica|FAR1|FAR1 family protein	199065	2.23722e-22	65.9574	95.5153	94	62
TRINITY_DN523813_c73_g6_i5	ZF-HD	510	gnl|BL_ORD_ID|269698Sopen05g016700.1 Solanum pennellii|ZF-HD|ZF-HD family protein	269698	3.33487e-08	48.9362	55.4546	141	69
TRINITY_DN469545_c2_g10_i1	TCP	403	gnl|BL_ORD_ID|270237Sopen12g015990.1 Solanum pennellii|TCP|TCP family protein	270237	9.96946e-16	58.4507	77.7962	142	83
TRINITY_DN523883_c16_g5_i2	HD-ZIP	291	gnl|BL_ORD_ID|269681Sopen09g021360.1 Solanum pennellii|HD-ZIP|HD-ZIP family protein	269681	6.54885e-33	75.2688	125.946	93	70
TRINITY_DN523959_c5_g3_i3	M-type_MADS	3672	gnl|BL_ORD_ID|198356LOC_Os11g12360.1 Oryza sativa subsp. japonica|M-type_MADS|M-type_MADS family protein	198356	8.84349e-157	54.2697	524.242	890	483
TRINITY_DN523883_c15_g8_i1	FAR1	209	gnl|BL_ORD_ID|81473Dca46628.1 Dianthus caryophyllus|FAR1|FAR1 family protein	81473	2.29585e-17	69.5652	77.0258	69	48
TRINITY_DN412082_c8_g3_i5	TCP	287	gnl|BL_ORD_ID|269425Sopen05g005700.1 Solanum pennellii|TCP|TCP family protein	269425	0.00267868	61.3636	36.965	44	27
TRINITY_DN472340_c3_g14_i1	TCP	289	gnl|BL_ORD_ID|269425Sopen05g005700.1 Solanum pennellii|TCP|TCP family protein	269425	2.80743e-08	58	43.1282	50	29
TRINITY_DN511508_c3_g2_i7	SRS	547	gnl|BL_ORD_ID|246261RrC2198_p1 Raphanus raphanistrum|SRS|SRS family protein	246261	0.0113601	43.8776	38.891	98	43
TRINITY_DN339674_c0_g1_i1	M-type_MADS	212	gnl|BL_ORD_ID|198356LOC_Os11g12360.1 Oryza sativa subsp. japonica|M-type_MADS|M-type_MADS family protein	198356	0.023112	53.0303	35.4242	66	35
TRINITY_DN523396_c11_g6_i1	ERF	281	gnl|BL_ORD_ID|291652XP_010556248.1 Tarenaya hassleriana|ERF|ERF family protein	291652	4.97041e-08	74	53.1434	50	37
TRINITY_DN523402_c11_g8_i1	M-type_MADS	393	gnl|BL_ORD_ID|198356LOC_Os11g12360.1 Oryza sativa subsp. japonica|M-type_MADS|M-type_MADS family protein	198356	1.94698e-42	71.0938	154.836	128	91
TRINITY_DN464704_c16_g1_i1	NAC	204	gnl|BL_ORD_ID|296846TRIUR3_11787-P1 Triticum urartu|NAC|NAC family protein	296846	3.37394e-17	95	77.7962	40	38
TRINITY_DN413171_c2_g1_i2	HB-other	346	gnl|BL_ORD_ID|294387Tp57577_TGAC_v2_mRNA30449 Trifolium pratense|HB-other|HB-other family protein	294387	0.0405383	56	35.4242	50	28
TRINITY_DN474894_c5_g2_i2	bHLH	273	gnl|BL_ORD_ID|258656676783878 Sisymbrium irio|bHLH|bHLH family protein	258656	2.14202e-05	66.129	44.2838	62	41
TRINITY_DN504486_c2_g1_i1	MYB	265	gnl|BL_ORD_ID|20594EMT02062 Aegilops tauschii|MYB_related|MYB_related family protein	20594	0.0235372	65.7143	35.039	35	23
TRINITY_DN467892_c0_g3_i1	ERF	220	gnl|BL_ORD_ID|270781Sopen11g017580.1 Solanum pennellii|ERF|ERF family protein	270781	0.00212792	52.1127	38.5058	71	37
TRINITY_DN436194_c0_g1_i1	LBD	241	gnl|BL_ORD_ID|269669Sopen05g028040.1 Solanum pennellii|LBD|LBD family protein	269669	3.11061e-22	77.2152	93.9745	79	61
TRINITY_DN483878_c2_g1_i6	TCP	211	gnl|BL_ORD_ID|208424PDK_30s882641g001 Phoenix dactylifera|TCP|TCP family protein	208424	0.00450314	53.8462	37.3502	65	35
TRINITY_DN503073_c5_g8_i1	CPP	399	gnl|BL_ORD_ID|71908cra_locus_17471_iso_1 Catharanthus roseus|CPP|CPP family protein	71908	0.023223	47.7778	36.5798	90	43
TRINITY_DN429719_c1_g3_i1	M-type_MADS	398	gnl|BL_ORD_ID|198356LOC_Os11g12360.1 Oryza sativa subsp. japonica|M-type_MADS|M-type_MADS family protein	198356	4.50656e-47	72.4638	168.318	138	100
TRINITY_DN523773_c43_g3_i3	CAMTA	424	gnl|BL_ORD_ID|119608KHN06577.1 Glycine soja|CAMTA|CAMTA family protein	119608	0.0247813	44.6602	36.965	103	46
TRINITY_DN519107_c6_g8_i4	NAC	539	gnl|BL_ORD_ID|35195XP_013639656.1 Brassica oleracea|NAC|NAC family protein	35195	8.92823e-16	47.5524	78.1814	143	68
TRINITY_DN470455_c11_g1_i1	FAR1	223	gnl|BL_ORD_ID|199065LOC_Os04g22990.1 Oryza sativa subsp. japonica|FAR1|FAR1 family protein	199065	1.08288e-11	57.5342	63.5438	73	42
TRINITY_DN498538_c8_g7_i1	TCP	206	gnl|BL_ORD_ID|269425Sopen05g005700.1 Solanum pennellii|TCP|TCP family protein	269425	2.43309e-18	75.4098	82.4185	61	46
TRINITY_DN493458_c6_g2_i1	FAR1	293	gnl|BL_ORD_ID|199065LOC_Os04g22990.1 Oryza sativa subsp. japonica|FAR1|FAR1 family protein	199065	1.22887e-29	70.2128	116.316	94	66
TRINITY_DN474846_c7_g6_i2	NAC	231	gnl|BL_ORD_ID|20708EMT33859 Aegilops tauschii|NAC|NAC family protein	20708	7.03225e-06	50.7042	45.8246	71	36
TRINITY_DN474059_c9_g7_i2	FAR1	233	gnl|BL_ORD_ID|199065LOC_Os04g22990.1 Oryza sativa subsp. japonica|FAR1|FAR1 family protein	199065	2.07783e-07	57.5342	50.8322	73	42
TRINITY_DN409693_c2_g3_i1	C2H2	203	gnl|BL_ORD_ID|297126TRIUR3_34542-P1 Triticum urartu|C2H2|C2H2 family protein	297126	0.000317024	73.6842	40.4318	38	28
TRINITY_DN509613_c20_g9_i7	MYB	383	gnl|BL_ORD_ID|20187EMT20255 Aegilops tauschii|MYB|MYB family protein	20187	5.10334e-23	64.2857	95.1301	98	63
TRINITY_DN523813_c76_g5_i5	EIL	419	gnl|BL_ORD_ID|296967TRIUR3_20987-P1 Triticum urartu|EIL|EIL family protein	296967	4.37234e-16	61.5385	77.7962	91	56
TRINITY_DN833378_c0_g1_i1	NF-YB	466	gnl|BL_ORD_ID|314485Zmw_sc02908.1.g00160.1 Zoysia matrella|NF-YB|NF-YB family protein	314485	8.20312e-17	81.1594	81.2629	69	56
TRINITY_DN184081_c0_g1_i1	ERF	203	gnl|BL_ORD_ID|270781Sopen11g017580.1 Solanum pennellii|ERF|ERF family protein	270781	0.0183231	51.8519	35.4242	54	28
TRINITY_DN476206_c7_g3_i1	B3	269	gnl|BL_ORD_ID|270192Sopen00g003940.1 Solanum pennellii|B3|B3 family protein	270192	0.000506668	64.2857	40.817	42	27
TRINITY_DN340423_c0_g1_i1	M-type_MADS	205	gnl|BL_ORD_ID|198356LOC_Os11g12360.1 Oryza sativa subsp. japonica|M-type_MADS|M-type_MADS family protein	198356	1.658e-12	62.5	65.4698	64	40
TRINITY_DN504384_c47_g28_i2	G2-like	2125	gnl|BL_ORD_ID|269967Sopen02g025440.1 Solanum pennellii|G2-like|G2-like family protein	269967	2.51948e-31	51.0204	134.035	294	150
TRINITY_DN523986_c7_g1_i5	FAR1	4355	gnl|BL_ORD_ID|26579Bradi2g37795.1.p Brachypodium distachyon|FAR1|FAR1 family protein	26579	6.4598e-160	57.0442	506.523	724	413
TRINITY_DN464368_c5_g1_i2	FAR1	371	gnl|BL_ORD_ID|199065LOC_Os04g22990.1 Oryza sativa subsp. japonica|FAR1|FAR1 family protein	199065	4.65923e-37	72.2689	139.043	119	86
TRINITY_DN504322_c9_g2_i1	FAR1	237	gnl|BL_ORD_ID|199065LOC_Os04g22990.1 Oryza sativa subsp. japonica|FAR1|FAR1 family protein	199065	2.9234e-34	81.0127	129.028	79	64
TRINITY_DN364553_c1_g1_i1	NF-YB	201	gnl|BL_ORD_ID|128119Itr_sc000950.1_g00003.1 Ipomoea trifida|NF-YB|NF-YB family protein	128119	2.78706e-07	60.6557	50.0618	61	37
TRINITY_DN492593_c6_g2_i1	HD-ZIP	296	gnl|BL_ORD_ID|216651PH01000183G0940 Phyllostachys heterocycla|HD-ZIP|HD-ZIP family protein	216651	0.000384079	42.8571	41.2022	63	27
TRINITY_DN443710_c1_g2_i1	FAR1	236	gnl|BL_ORD_ID|199065LOC_Os04g22990.1 Oryza sativa subsp. japonica|FAR1|FAR1 family protein	199065	3.45844e-21	67.9487	91.2781	78	53
TRINITY_DN480550_c2_g2_i2	NAC	302	gnl|BL_ORD_ID|296685TRIUR3_29857-P1 Triticum urartu|NAC|NAC family protein	296685	7.16794e-37	90.9091	134.42	99	90
TRINITY_DN521195_c1_g7_i5	M-type_MADS	434	gnl|BL_ORD_ID|198356LOC_Os11g12360.1 Oryza sativa subsp. japonica|M-type_MADS|M-type_MADS family protein	198356	2.2547e-22	61.8056	97.4413	144	89
TRINITY_DN488419_c1_g1_i2	ERF	260	gnl|BL_ORD_ID|291652XP_010556248.1 Tarenaya hassleriana|ERF|ERF family protein	291652	1.33863e-26	74.4186	107.071	86	64
TRINITY_DN367932_c1_g1_i1	M-type_MADS	202	gnl|BL_ORD_ID|262338Solyc11g069770.1.1 Solanum lycopersicum|M-type_MADS|M-type_MADS family protein	262338	0.0133821	56.4103	35.039	39	22
TRINITY_DN523228_c8_g1_i14	WRKY	844	gnl|BL_ORD_ID|216534PH01000906G0240 Phyllostachys heterocycla|WRKY|WRKY family protein	216534	0.000887051	57.8125	43.5134	64	37
TRINITY_DN487346_c7_g1_i3	NAC	236	gnl|BL_ORD_ID|296846TRIUR3_11787-P1 Triticum urartu|NAC|NAC family protein	296846	0.000438258	47.4576	40.4318	59	28
TRINITY_DN501540_c4_g9_i1	ZF-HD	226	gnl|BL_ORD_ID|269698Sopen05g016700.1 Solanum pennellii|ZF-HD|ZF-HD family protein	269698	4.13712e-09	58.8235	55.8398	85	50
TRINITY_DN517252_c7_g9_i1	B3	216	gnl|BL_ORD_ID|284393Traes_2AS_70A738C1B.2 Triticum aestivum|B3|B3 family protein	284393	1.09512e-06	54.0984	46.2098	61	33
TRINITY_DN522622_c1_g5_i1	WRKY	622	gnl|BL_ORD_ID|270224Sopen05g009000.1 Solanum pennellii|WRKY|WRKY family protein	270224	7.98174e-12	52.5862	66.2402	116	61
TRINITY_DN473014_c12_g10_i1	FAR1	298	gnl|BL_ORD_ID|199065LOC_Os04g22990.1 Oryza sativa subsp. japonica|FAR1|FAR1 family protein	199065	2.42864e-29	71.5789	115.546	95	68
TRINITY_DN451471_c0_g5_i3	ERF	323	gnl|BL_ORD_ID|270781Sopen11g017580.1 Solanum pennellii|ERF|ERF family protein	270781	4.19233e-16	65.7895	77.7962	76	50
TRINITY_DN412434_c0_g3_i1	M-type_MADS	224	gnl|BL_ORD_ID|198356LOC_Os11g12360.1 Oryza sativa subsp. japonica|M-type_MADS|M-type_MADS family protein	198356	0.00149557	57.7778	39.2762	45	26
TRINITY_DN471314_c17_g1_i1	bHLH	226	gnl|BL_ORD_ID|296394TRIUR3_31817-P1 Triticum urartu|bHLH|bHLH family protein	296394	1.06447e-14	89.1892	70.4774	37	33
TRINITY_DN348556_c0_g3_i1	TCP	286	gnl|BL_ORD_ID|270237Sopen12g015990.1 Solanum pennellii|TCP|TCP family protein	270237	9.81322e-14	64.3836	70.0922	73	47
TRINITY_DN493369_c5_g3_i2	FAR1	237	gnl|BL_ORD_ID|81473Dca46628.1 Dianthus caryophyllus|FAR1|FAR1 family protein	81473	1.06654e-12	61.8421	64.6994	76	47
TRINITY_DN514747_c23_g5_i2	bHLH	279	gnl|BL_ORD_ID|297244TRIUR3_29035-P1 Triticum urartu|bHLH|bHLH family protein	297244	4.0875e-12	84.6154	64.3142	39	33
TRINITY_DN523702_c3_g2_i2	FAR1	701	gnl|BL_ORD_ID|27066Bradi3g11846.2.p Brachypodium distachyon|FAR1|FAR1 family protein	27066	1.07032e-35	68.3333	135.191	120	82
TRINITY_DN494860_c10_g4_i2	B3	284	gnl|BL_ORD_ID|270192Sopen00g003940.1 Solanum pennellii|B3|B3 family protein	270192	9.73642e-06	53.9474	46.2098	76	41
TRINITY_DN512167_c31_g12_i2	M-type_MADS	912	gnl|BL_ORD_ID|198356LOC_Os11g12360.1 Oryza sativa subsp. japonica|M-type_MADS|M-type_MADS family protein	198356	6.52504e-17	48.6842	62.003	152	74
TRINITY_DN523941_c0_g1_i1	G2-like	296	gnl|BL_ORD_ID|208512PDK_30s1044831g002 Phoenix dactylifera|G2-like|G2-like family protein	208512	2.96052e-09	57.7465	55.8398	71	41
TRINITY_DN503736_c5_g2_i1	LBD	205	gnl|BL_ORD_ID|250519Rsa1.0_02878.1_g00005.1 Raphanus sativus|LBD|LBD family protein	250519	7.05399e-14	64.1791	69.707	67	43
TRINITY_DN475478_c0_g8_i1	ERF	330	gnl|BL_ORD_ID|270781Sopen11g017580.1 Solanum pennellii|ERF|ERF family protein	270781	8.07471e-28	69.7248	111.694	109	76
TRINITY_DN470870_c0_g3_i3	NAC	255	gnl|BL_ORD_ID|4480Achn335281 Actinidia chinensis|NAC|NAC family protein	4480	2.66166e-05	51.9481	44.669	77	40
TRINITY_DN233952_c0_g1_i1	G2-like	272	gnl|BL_ORD_ID|98229mrna15055.1-v1.0-hybrid Fragaria vesca|G2-like|G2-like family protein	98229	0.000216211	69.0476	41.9726	42	29
TRINITY_DN523883_c16_g2_i1	TCP	656	gnl|BL_ORD_ID|270237Sopen12g015990.1 Solanum pennellii|TCP|TCP family protein	270237	2.07018e-100	83.0275	325.479	218	181
TRINITY_DN496214_c7_g4_i1	NAC	220	gnl|BL_ORD_ID|128048Itr_sc004419.1_g00003.1 Ipomoea trifida|NAC|NAC family protein	128048	2.45238e-17	65.7143	79.7221	70	46
TRINITY_DN523813_c81_g3_i7	MYB	348	gnl|BL_ORD_ID|20187EMT20255 Aegilops tauschii|MYB|MYB family protein	20187	1.64179e-07	61.8182	51.2174	55	34
TRINITY_DN523856_c12_g9_i6	C2H2	348	gnl|BL_ORD_ID|50796XP_012575683.1 Cicer arietinum|C2H2|C2H2 family protein	50796	1.45552e-09	78.2609	58.5362	46	36
TRINITY_DN479570_c4_g3_i1	B3	233	gnl|BL_ORD_ID|270192Sopen00g003940.1 Solanum pennellii|B3|B3 family protein	270192	1.52787e-05	57.6923	45.0542	78	45
TRINITY_DN397711_c18_g3_i1	Trihelix	726	gnl|BL_ORD_ID|297027TRIUR3_33328-P1 Triticum urartu|Trihelix|Trihelix family protein	297027	1.57272e-28	72.9167	118.242	96	70
TRINITY_DN515753_c10_g7_i1	B3	224	gnl|BL_ORD_ID|145960Lus10026265 Linum usitatissimum|B3|B3 family protein	145960	0.000980114	54.1667	39.2762	48	26
TRINITY_DN398980_c0_g1_i1	CAMTA	216	gnl|BL_ORD_ID|217041PH01000201G0710 Phyllostachys heterocycla|CAMTA|CAMTA family protein	217041	2.22588e-26	79.4118	105.531	68	54
TRINITY_DN473854_c6_g2_i6	ZF-HD	399	gnl|BL_ORD_ID|269698Sopen05g016700.1 Solanum pennellii|ZF-HD|ZF-HD family protein	269698	0.000306279	47.7273	42.3578	88	42
TRINITY_DN521381_c6_g3_i1	TCP	446	gnl|BL_ORD_ID|270237Sopen12g015990.1 Solanum pennellii|TCP|TCP family protein	270237	2.26016e-11	46.9388	65.0846	147	69
TRINITY_DN469730_c9_g7_i2	NAC	310	gnl|BL_ORD_ID|182078ORGLA05G0101300.1 Oryza glaberrima|NAC|NAC family protein	182078	0.000519611	48	40.4318	100	48
TRINITY_DN920404_c0_g1_i1	B3	204	gnl|BL_ORD_ID|21154EMT05021 Aegilops tauschii|B3|B3 family protein	21154	3.63788e-07	53.8462	49.2914	78	42
TRINITY_DN264875_c0_g1_i1	ERF	285	gnl|BL_ORD_ID|270781Sopen11g017580.1 Solanum pennellii|ERF|ERF family protein	270781	2.58679e-16	63.0435	77.7962	92	58
TRINITY_DN396179_c0_g1_i1	WRKY	228	gnl|BL_ORD_ID|295541Tp57577_TGAC_v2_mRNA31725 Trifolium pratense|WRKY|WRKY family protein	295541	7.64075e-20	76.3889	87.0409	72	55
TRINITY_DN473755_c2_g6_i3	ERF	215	gnl|BL_ORD_ID|291652XP_010556248.1 Tarenaya hassleriana|ERF|ERF family protein	291652	1.41018e-06	60.5634	48.1358	71	43
TRINITY_DN486953_c2_g5_i1	MYB	251	gnl|BL_ORD_ID|129823Jcr4S05030.40 Jatropha curcas|MYB|MYB family protein	129823	2.61532e-16	64.6341	77.0258	82	53
TRINITY_DN523890_c6_g2_i5	WRKY	301	gnl|BL_ORD_ID|296850TRIUR3_21738-P1 Triticum urartu|WRKY|WRKY family protein	296850	9.37709e-16	83.3333	72.7886	48	40
TRINITY_DN472585_c5_g6_i2	M-type_MADS	258	gnl|BL_ORD_ID|198356LOC_Os11g12360.1 Oryza sativa subsp. japonica|M-type_MADS|M-type_MADS family protein	198356	2.36257e-21	72.093	92.0485	86	62
TRINITY_DN465108_c3_g12_i1	NAC	227	gnl|BL_ORD_ID|296846TRIUR3_11787-P1 Triticum urartu|NAC|NAC family protein	296846	1.80396e-14	74.5098	70.4774	51	38
TRINITY_DN476177_c7_g1_i11	FAR1	314	gnl|BL_ORD_ID|199065LOC_Os04g22990.1 Oryza sativa subsp. japonica|FAR1|FAR1 family protein	199065	8.78419e-41	78.2178	149.058	101	79
TRINITY_DN466528_c0_g1_i1	bHLH	1509	gnl|BL_ORD_ID|21410EMT03129 Aegilops tauschii|bHLH|bHLH family protein	21410	2.38405e-27	47.1471	119.783	333	157
TRINITY_DN503924_c11_g1_i1	FAR1	223	gnl|BL_ORD_ID|199065LOC_Os04g22990.1 Oryza sativa subsp. japonica|FAR1|FAR1 family protein	199065	2.95646e-15	64.8649	73.9442	74	48
TRINITY_DN515777_c10_g3_i3	WRKY	404	gnl|BL_ORD_ID|250373Rsa1.0_07654.1_g00001.1 Raphanus sativus|WRKY|WRKY family protein	250373	4.03614e-09	55	57.7658	80	44
TRINITY_DN498538_c8_g3_i2	TCP	441	gnl|BL_ORD_ID|269425Sopen05g005700.1 Solanum pennellii|TCP|TCP family protein	269425	3.61881e-32	63.6986	125.561	146	93
TRINITY_DN494860_c10_g6_i2	MIKC_MADS	202	gnl|BL_ORD_ID|270182Sopen11g012490.1 Solanum pennellii|MIKC_MADS|MIKC_MADS family protein	270182	0.000270535	52.9412	41.2022	68	36
TRINITY_DN504919_c3_g1_i1	M-type_MADS	234	gnl|BL_ORD_ID|198356LOC_Os11g12360.1 Oryza sativa subsp. japonica|M-type_MADS|M-type_MADS family protein	198356	4.87759e-22	72.2222	93.5893	72	52
TRINITY_DN475153_c14_g9_i1	NAC	560	gnl|BL_ORD_ID|128048Itr_sc004419.1_g00003.1 Ipomoea trifida|NAC|NAC family protein	128048	2.33436e-21	60.7477	95.9005	107	65
TRINITY_DN446581_c0_g1_i1	ZF-HD	202	gnl|BL_ORD_ID|269698Sopen05g016700.1 Solanum pennellii|ZF-HD|ZF-HD family protein	269698	1.28625e-18	75.7576	83.1889	66	50
TRINITY_DN468719_c12_g5_i2	bHLH	258	gnl|BL_ORD_ID|258656676783878 Sisymbrium irio|bHLH|bHLH family protein	258656	4.66657e-05	66.129	43.1282	62	41
TRINITY_DN512882_c12_g9_i1	FAR1	259	gnl|BL_ORD_ID|199065LOC_Os04g22990.1 Oryza sativa subsp. japonica|FAR1|FAR1 family protein	199065	9.6559e-23	69.7674	95.9005	86	60
TRINITY_DN290105_c2_g2_i3	NAC	211	gnl|BL_ORD_ID|128048Itr_sc004419.1_g00003.1 Ipomoea trifida|NAC|NAC family protein	128048	2.96406e-09	58.209	56.225	67	39
TRINITY_DN504647_c7_g6_i1	FAR1	219	gnl|BL_ORD_ID|199065LOC_Os04g22990.1 Oryza sativa subsp. japonica|FAR1|FAR1 family protein	199065	1.51811e-23	79.1667	97.8265	72	57
TRINITY_DN225045_c0_g1_i1	FAR1	234	gnl|BL_ORD_ID|21158EMT21149 Aegilops tauschii|FAR1|FAR1 family protein	21158	1.95969e-09	71.4286	56.6102	42	30
TRINITY_DN523814_c5_g2_i1	bHLH	1392	gnl|BL_ORD_ID|21410EMT03129 Aegilops tauschii|bHLH|bHLH family protein	21410	2.58244e-29	51.7928	125.946	251	130
TRINITY_DN436823_c1_g1_i1	HD-ZIP	237	gnl|BL_ORD_ID|269681Sopen09g021360.1 Solanum pennellii|HD-ZIP|HD-ZIP family protein	269681	4.69971e-31	82.0513	119.783	78	64
TRINITY_DN313855_c0_g2_i1	ERF	231	gnl|BL_ORD_ID|291652XP_010556248.1 Tarenaya hassleriana|ERF|ERF family protein	291652	6.38718e-25	80.2632	101.679	76	61
TRINITY_DN605353_c0_g1_i1	LBD	315	gnl|BL_ORD_ID|126762Itr_sc000159.1_g00052.1 Ipomoea trifida|LBD|LBD family protein	126762	0.000151211	47.619	42.743	63	30
TRINITY_DN522088_c116_g3_i4	NAC	446	gnl|BL_ORD_ID|128048Itr_sc004419.1_g00003.1 Ipomoea trifida|NAC|NAC family protein	128048	1.47401e-26	63.4921	109.768	126	80
TRINITY_DN523856_c8_g1_i2	G2-like	257	gnl|BL_ORD_ID|297310TRIUR3_32904-P1 Triticum urartu|G2-like|G2-like family protein	297310	3.06219e-17	90.9091	79.337	44	40
TRINITY_DN519778_c27_g2_i1	WRKY	407	gnl|BL_ORD_ID|295817Tp57577_TGAC_v2_mRNA41483 Trifolium pratense|WRKY|WRKY family protein	295817	0.0232291	49.0196	36.5798	51	25
TRINITY_DN523883_c16_g5_i1	TCP	271	gnl|BL_ORD_ID|270237Sopen12g015990.1 Solanum pennellii|TCP|TCP family protein	270237	3.40869e-34	78.4091	129.413	88	69
TRINITY_DN483312_c14_g6_i2	bHLH	369	gnl|BL_ORD_ID|297244TRIUR3_29035-P1 Triticum urartu|bHLH|bHLH family protein	297244	1.58093e-17	73.4375	80.8777	64	47
TRINITY_DN519778_c28_g1_i2	M-type_MADS	984	gnl|BL_ORD_ID|198356LOC_Os11g12360.1 Oryza sativa subsp. japonica|M-type_MADS|M-type_MADS family protein	198356	5.60122e-161	82.622	501.901	328	271
TRINITY_DN468473_c0_g1_i3	FAR1	263	gnl|BL_ORD_ID|81473Dca46628.1 Dianthus caryophyllus|FAR1|FAR1 family protein	81473	1.53745e-18	68	80.8777	75	51
TRINITY_DN481320_c2_g4_i1	GRAS	330	gnl|BL_ORD_ID|297329TRIUR3_22881-P1 Triticum urartu|GRAS|GRAS family protein	297329	1.0834e-23	85.4545	80.1073	55	47
TRINITY_DN464711_c27_g5_i5	MYB	387	gnl|BL_ORD_ID|20187EMT20255 Aegilops tauschii|MYB|MYB family protein	20187	2.01824e-47	83.1683	160.999	101	84
TRINITY_DN392737_c2_g2_i1	bHLH	208	gnl|BL_ORD_ID|20362EMT03170 Aegilops tauschii|bHLH|bHLH family protein	20362	1.95508e-07	77.1429	49.6766	35	27
TRINITY_DN495192_c1_g1_i1	ERF	243	gnl|BL_ORD_ID|291652XP_010556248.1 Tarenaya hassleriana|ERF|ERF family protein	291652	7.15769e-24	77.9221	98.9821	77	60
TRINITY_DN484382_c8_g8_i1	FAR1	409	gnl|BL_ORD_ID|199065LOC_Os04g22990.1 Oryza sativa subsp. japonica|FAR1|FAR1 family protein	199065	6.92589e-11	49.6241	63.1586	133	66
TRINITY_DN385019_c1_g4_i1	ZF-HD	247	gnl|BL_ORD_ID|269698Sopen05g016700.1 Solanum pennellii|ZF-HD|ZF-HD family protein	269698	1.76371e-09	70.9091	57.3806	55	39
TRINITY_DN487669_c4_g9_i2	TCP	275	gnl|BL_ORD_ID|270237Sopen12g015990.1 Solanum pennellii|TCP|TCP family protein	270237	5.04536e-30	73.3333	117.472	90	66
TRINITY_DN523486_c91_g2_i1	NAC	223	gnl|BL_ORD_ID|128048Itr_sc004419.1_g00003.1 Ipomoea trifida|NAC|NAC family protein	128048	4.20276e-09	62.7119	55.8398	59	37
TRINITY_DN466877_c3_g1_i2	FAR1	248	gnl|BL_ORD_ID|199065LOC_Os04g22990.1 Oryza sativa subsp. japonica|FAR1|FAR1 family protein	199065	4.14057e-06	58.5714	47.3654	70	41
TRINITY_DN478272_c25_g2_i1	MYB	217	gnl|BL_ORD_ID|20187EMT20255 Aegilops tauschii|MYB|MYB family protein	20187	3.14499e-11	62.8571	60.4622	70	44
TRINITY_DN478531_c10_g3_i1	FAR1	245	gnl|BL_ORD_ID|199065LOC_Os04g22990.1 Oryza sativa subsp. japonica|FAR1|FAR1 family protein	199065	1.35911e-21	71.6049	92.4337	81	58
TRINITY_DN504334_c2_g2_i1	M-type_MADS	215	gnl|BL_ORD_ID|198356LOC_Os11g12360.1 Oryza sativa subsp. japonica|M-type_MADS|M-type_MADS family protein	198356	0.00956053	50.7463	36.5798	67	34
TRINITY_DN487438_c6_g19_i2	FAR1	267	gnl|BL_ORD_ID|199065LOC_Os04g22990.1 Oryza sativa subsp. japonica|FAR1|FAR1 family protein	199065	1.40387e-07	56.8627	51.9878	51	29
TRINITY_DN523907_c16_g1_i3	LBD	3106	gnl|BL_ORD_ID|126762Itr_sc000159.1_g00052.1 Ipomoea trifida|LBD|LBD family protein	126762	4.51713e-108	66.8508	374.015	362	242
TRINITY_DN425179_c0_g1_i2	ZF-HD	205	gnl|BL_ORD_ID|269698Sopen05g016700.1 Solanum pennellii|ZF-HD|ZF-HD family protein	269698	6.71626e-26	83.8235	104.375	68	57
TRINITY_DN508548_c10_g8_i3	FAR1	413	gnl|BL_ORD_ID|199065LOC_Os04g22990.1 Oryza sativa subsp. japonica|FAR1|FAR1 family protein	199065	3.84808e-20	52.2727	90.5077	132	69
TRINITY_DN513433_c1_g2_i1	M-type_MADS	212	gnl|BL_ORD_ID|198356LOC_Os11g12360.1 Oryza sativa subsp. japonica|M-type_MADS|M-type_MADS family protein	198356	2.41316e-13	75.4386	68.1662	57	43
TRINITY_DN486439_c5_g4_i4	Dof	313	gnl|BL_ORD_ID|296966TRIUR3_27858-P1 Triticum urartu|Dof|Dof family protein	296966	0.000931761	50	39.2762	84	42
TRINITY_DN436617_c2_g1_i1	B3	224	gnl|BL_ORD_ID|20166EMT01685 Aegilops tauschii|B3|B3 family protein	20166	4.69609e-05	58.3333	43.5134	48	28
TRINITY_DN520833_c13_g4_i7	Nin-like	674	gnl|BL_ORD_ID|126904Itr_sc000560.1_g00013.1 Ipomoea trifida|Nin-like|Nin-like family protein	126904	2.5956e-34	63.8037	135.191	163	104
TRINITY_DN479847_c5_g2_i1	TCP	207	gnl|BL_ORD_ID|269425Sopen05g005700.1 Solanum pennellii|TCP|TCP family protein	269425	2.86114e-10	62.6866	58.9214	67	42
TRINITY_DN505264_c1_g1_i1	B3	286	gnl|BL_ORD_ID|264014Sme2.5_14039.1_g00001.1 Solanum melongena|B3|B3 family protein	264014	9.46482e-12	51.1905	40.0466	84	43
TRINITY_DN521689_c8_g10_i1	HD-ZIP	282	gnl|BL_ORD_ID|269681Sopen09g021360.1 Solanum pennellii|HD-ZIP|HD-ZIP family protein	269681	5.74221e-36	80.4348	134.42	92	74
TRINITY_DN523883_c16_g6_i3	ERF	272	gnl|BL_ORD_ID|291652XP_010556248.1 Tarenaya hassleriana|ERF|ERF family protein	291652	4.40039e-29	76.6667	114.39	90	69
TRINITY_DN498538_c8_g14_i1	TCP	312	gnl|BL_ORD_ID|269425Sopen05g005700.1 Solanum pennellii|TCP|TCP family protein	269425	2.5672e-23	66.2921	98.2117	89	59
TRINITY_DN490229_c9_g5_i1	ZF-HD	377	gnl|BL_ORD_ID|269698Sopen05g016700.1 Solanum pennellii|ZF-HD|ZF-HD family protein	269698	4.66666e-20	60	90.1225	110	66
TRINITY_DN296218_c0_g1_i1	HD-ZIP	203	gnl|BL_ORD_ID|74456PK03054.1 Cannabis sativa|HD-ZIP|HD-ZIP family protein	74456	0.0417214	55.102	34.2686	49	27
TRINITY_DN477869_c0_g4_i1	HD-ZIP	202	gnl|BL_ORD_ID|269681Sopen09g021360.1 Solanum pennellii|HD-ZIP|HD-ZIP family protein	269681	1.07563e-23	79.1045	97.8265	67	53
TRINITY_DN481297_c5_g1_i1	bHLH	252	gnl|BL_ORD_ID|258656676783878 Sisymbrium irio|bHLH|bHLH family protein	258656	0.00222546	64.2857	38.1206	56	36
TRINITY_DN454545_c2_g3_i4	ZF-HD	210	gnl|BL_ORD_ID|269698Sopen05g016700.1 Solanum pennellii|ZF-HD|ZF-HD family protein	269698	0.0074128	66.6667	36.965	36	24
TRINITY_DN523447_c32_g5_i1	NAC	236	gnl|BL_ORD_ID|20173EMT03425 Aegilops tauschii|NAC|NAC family protein	20173	1.60012e-11	86.4865	62.3882	37	32
TRINITY_DN494078_c2_g15_i4	LBD	404	gnl|BL_ORD_ID|269669Sopen05g028040.1 Solanum pennellii|LBD|LBD family protein	269669	0.0206251	55.8824	36.965	68	38
TRINITY_DN313805_c0_g1_i2	GRAS	234	gnl|BL_ORD_ID|297067TRIUR3_03541-P1 Triticum urartu|GRAS|GRAS family protein	297067	0.0096124	55.3191	26.5646	47	26
TRINITY_DN414791_c0_g1_i8	NAC	286	gnl|BL_ORD_ID|128048Itr_sc004419.1_g00003.1 Ipomoea trifida|NAC|NAC family protein	128048	6.89037e-14	58	70.8626	100	58
TRINITY_DN415341_c0_g2_i1	M-type_MADS	207	gnl|BL_ORD_ID|198356LOC_Os11g12360.1 Oryza sativa subsp. japonica|M-type_MADS|M-type_MADS family protein	198356	1.09249e-32	88.5714	124.02	70	62
TRINITY_DN464226_c8_g3_i1	C2H2	328	gnl|BL_ORD_ID|297126TRIUR3_34542-P1 Triticum urartu|C2H2|C2H2 family protein	297126	7.50198e-09	83.7838	55.4546	37	31
TRINITY_DN494860_c10_g2_i2	MIKC_MADS	213	gnl|BL_ORD_ID|270182Sopen11g012490.1 Solanum pennellii|MIKC_MADS|MIKC_MADS family protein	270182	6.07876e-09	55.2239	55.0694	67	37
TRINITY_DN791690_c0_g1_i1	HD-ZIP	240	gnl|BL_ORD_ID|82545Dca2137.1 Dianthus caryophyllus|HD-ZIP|HD-ZIP family protein	82545	0.000578117	56.4516	40.4318	62	35
TRINITY_DN521880_c7_g6_i1	C3H	201	gnl|BL_ORD_ID|171871XP_016440619.1 Nicotiana tabacum|C3H|C3H family protein	171871	9.89627e-11	64.8148	60.077	54	35
TRINITY_DN477185_c12_g5_i5	NAC	287	gnl|BL_ORD_ID|128048Itr_sc004419.1_g00003.1 Ipomoea trifida|NAC|NAC family protein	128048	5.76855e-13	61.5385	68.1662	91	56
TRINITY_DN478659_c2_g4_i1	NAC	204	gnl|BL_ORD_ID|53190Csa10g004970.1 Camelina sativa|NAC|NAC family protein	53190	0.0487267	47.3684	33.8834	57	27
TRINITY_DN439044_c0_g3_i1	ERF	234	gnl|BL_ORD_ID|291652XP_010556248.1 Tarenaya hassleriana|ERF|ERF family protein	291652	1.96271e-20	68.8312	88.9669	77	53
TRINITY_DN463395_c7_g1_i2	NAC	267	gnl|BL_ORD_ID|128048Itr_sc004419.1_g00003.1 Ipomoea trifida|NAC|NAC family protein	128048	7.4087e-08	60.9375	52.7582	64	39
TRINITY_DN491806_c4_g7_i1	ERF	247	gnl|BL_ORD_ID|291652XP_010556248.1 Tarenaya hassleriana|ERF|ERF family protein	291652	1.79875e-14	91.1111	71.633	45	41
TRINITY_DN496806_c19_g2_i1	GRAS	213	gnl|BL_ORD_ID|20915EMT12179 Aegilops tauschii|GRAS|GRAS family protein	20915	3.68052e-32	88.7324	117.472	71	63
TRINITY_DN508548_c10_g7_i2	FAR1	212	gnl|BL_ORD_ID|199065LOC_Os04g22990.1 Oryza sativa subsp. japonica|FAR1|FAR1 family protein	199065	0.0137902	49.2308	35.8094	65	32
TRINITY_DN423226_c2_g1_i1	FAR1	243	gnl|BL_ORD_ID|199065LOC_Os04g22990.1 Oryza sativa subsp. japonica|FAR1|FAR1 family protein	199065	2.63337e-08	56.9444	53.9138	72	41
TRINITY_DN523920_c10_g2_i5	FAR1	2042	gnl|BL_ORD_ID|252582Sobic.009G135300.8.p Sorghum bicolor|FAR1|FAR1 family protein	252582	5.09128e-06	45.2703	53.1434	148	67
TRINITY_DN372266_c0_g1_i2	HD-ZIP	221	gnl|BL_ORD_ID|82545Dca2137.1 Dianthus caryophyllus|HD-ZIP|HD-ZIP family protein	82545	1.06688e-26	80.5556	105.916	72	58
TRINITY_DN444493_c6_g2_i1	FAR1	323	gnl|BL_ORD_ID|82637Dca43462.1 Dianthus caryophyllus|FAR1|FAR1 family protein	82637	0.00064486	42.6667	40.817	75	32
TRINITY_DN402923_c2_g1_i2	TCP	330	gnl|BL_ORD_ID|269425Sopen05g005700.1 Solanum pennellii|TCP|TCP family protein	269425	7.55945e-15	61.9565	73.9442	92	57
TRINITY_DN485166_c2_g1_i1	ZF-HD	344	gnl|BL_ORD_ID|269698Sopen05g016700.1 Solanum pennellii|ZF-HD|ZF-HD family protein	269698	0.00412654	49.3151	38.5058	73	36
TRINITY_DN487384_c3_g8_i1	ERF	243	gnl|BL_ORD_ID|291652XP_010556248.1 Tarenaya hassleriana|ERF|ERF family protein	291652	1.43973e-16	74.3243	77.7962	74	55
TRINITY_DN491395_c8_g2_i1	NAC	239	gnl|BL_ORD_ID|296846TRIUR3_11787-P1 Triticum urartu|NAC|NAC family protein	296846	2.59954e-21	89.7959	89.7373	49	44
TRINITY_DN520815_c26_g17_i1	TCP	4289	gnl|BL_ORD_ID|270237Sopen12g015990.1 Solanum pennellii|TCP|TCP family protein	270237	0	61.7949	668.307	780	482
TRINITY_DN451007_c1_g2_i1	NAC	274	gnl|BL_ORD_ID|296685TRIUR3_29857-P1 Triticum urartu|NAC|NAC family protein	296685	5.94514e-45	90.8046	156.377	87	79
TRINITY_DN466093_c14_g2_i8	FAR1	525	gnl|BL_ORD_ID|199065LOC_Os04g22990.1 Oryza sativa subsp. japonica|FAR1|FAR1 family protein	199065	5.54299e-11	52.439	64.3142	82	43
TRINITY_DN494078_c2_g8_i1	FAR1	356	gnl|BL_ORD_ID|21158EMT21149 Aegilops tauschii|FAR1|FAR1 family protein	21158	5.84334e-06	61.9048	47.3654	42	26
TRINITY_DN441509_c0_g1_i2	G2-like	253	gnl|BL_ORD_ID|269678Sopen11g010100.1 Solanum pennellii|G2-like|G2-like family protein	269678	1.71828e-08	57.3171	54.299	82	47
TRINITY_DN468788_c5_g4_i3	NAC	268	gnl|BL_ORD_ID|128048Itr_sc004419.1_g00003.1 Ipomoea trifida|NAC|NAC family protein	128048	1.39856e-07	77.7778	51.9878	36	28
TRINITY_DN523737_c70_g3_i2	TALE	224	gnl|BL_ORD_ID|82360Dca52723.1 Dianthus caryophyllus|TALE|TALE family protein	82360	0.0229619	56.5217	35.039	46	26
TRINITY_DN512022_c7_g1_i1	SBP	271	gnl|BL_ORD_ID|151139MDP0000246046 Malus domestica|SBP|SBP family protein	151139	0.0180896	64.4444	35.8094	45	29
TRINITY_DN456372_c0_g4_i1	FAR1	225	gnl|BL_ORD_ID|199065LOC_Os04g22990.1 Oryza sativa subsp. japonica|FAR1|FAR1 family protein	199065	3.5849e-08	50.6849	53.1434	73	37
TRINITY_DN482696_c0_g1_i2	HD-ZIP	291	gnl|BL_ORD_ID|82545Dca2137.1 Dianthus caryophyllus|HD-ZIP|HD-ZIP family protein	82545	0.00180561	65	39.2762	40	26
TRINITY_DN122244_c0_g1_i1	GRAS	216	gnl|BL_ORD_ID|297329TRIUR3_22881-P1 Triticum urartu|GRAS|GRAS family protein	297329	2.60854e-22	87.6923	93.5893	65	57
TRINITY_DN435253_c0_g1_i5	ZF-HD	262	gnl|BL_ORD_ID|269698Sopen05g016700.1 Solanum pennellii|ZF-HD|ZF-HD family protein	269698	4.94285e-32	73.2558	122.865	86	63
TRINITY_DN425027_c0_g1_i3	HD-ZIP	229	gnl|BL_ORD_ID|82545Dca2137.1 Dianthus caryophyllus|HD-ZIP|HD-ZIP family protein	82545	1.75501e-17	77.6119	79.7221	67	52
TRINITY_DN498538_c8_g12_i3	ERF	558	gnl|BL_ORD_ID|270781Sopen11g017580.1 Solanum pennellii|ERF|ERF family protein	270781	5.95632e-34	63.2258	132.494	155	98
TRINITY_DN498538_c8_g12_i4	LBD	358	gnl|BL_ORD_ID|250519Rsa1.0_02878.1_g00005.1 Raphanus sativus|LBD|LBD family protein	250519	1.60011e-23	67.3077	99.7525	104	70
TRINITY_DN468907_c6_g9_i3	MYB	255	gnl|BL_ORD_ID|20477EMT24643 Aegilops tauschii|MYB_related|MYB_related family protein	20477	1.87219e-08	67.3469	54.299	49	33
TRINITY_DN523862_c4_g1_i3	FAR1	2882	gnl|BL_ORD_ID|43877Brast09G036400.1.p Brachypodium stacei|FAR1|FAR1 family protein	43877	0	71.0317	580.867	504	358
TRINITY_DN382759_c0_g1_i1	WRKY	249	gnl|BL_ORD_ID|248470Rsa1.0_01894.1_g00003.1 Raphanus sativus|WRKY|WRKY family protein	248470	1.69973e-12	75	55.8398	44	33
TRINITY_DN520833_c13_g6_i2	G2-like	219	gnl|BL_ORD_ID|97663FANhyb_rscf00000398.1.g00005.1 Fragaria x ananassa|G2-like|G2-like family protein	97663	3.5615e-15	63.7681	73.1738	69	44
TRINITY_DN467582_c9_g5_i1	NF-YC	263	gnl|BL_ORD_ID|263429Sme2.5_01876.1_g00001.1 Solanum melongena|NF-YC|NF-YC family protein	263429	2.98806e-24	74.6988	99.7525	83	62
TRINITY_DN486962_c3_g1_i3	ERF	256	gnl|BL_ORD_ID|291652XP_010556248.1 Tarenaya hassleriana|ERF|ERF family protein	291652	1.60187e-24	75.6098	100.908	82	62
TRINITY_DN476577_c1_g5_i2	M-type_MADS	242	gnl|BL_ORD_ID|198356LOC_Os11g12360.1 Oryza sativa subsp. japonica|M-type_MADS|M-type_MADS family protein	198356	6.0365e-36	90.6667	134.035	75	68
TRINITY_DN512167_c30_g3_i1	M-type_MADS	372	gnl|BL_ORD_ID|198356LOC_Os11g12360.1 Oryza sativa subsp. japonica|M-type_MADS|M-type_MADS family protein	198356	1.35978e-09	52.6882	58.9214	93	49
TRINITY_DN382057_c0_g1_i1	G2-like	234	gnl|BL_ORD_ID|97663FANhyb_rscf00000398.1.g00005.1 Fragaria x ananassa|G2-like|G2-like family protein	97663	9.71942e-12	58.9041	63.5438	73	43
TRINITY_DN455931_c7_g6_i1	FAR1	323	gnl|BL_ORD_ID|21158EMT21149 Aegilops tauschii|FAR1|FAR1 family protein	21158	2.8094e-33	86.4865	126.331	74	64
TRINITY_DN515777_c10_g6_i2	LBD	325	gnl|BL_ORD_ID|126762Itr_sc000159.1_g00052.1 Ipomoea trifida|LBD|LBD family protein	126762	1.60752e-26	72.5275	107.842	91	66
TRINITY_DN195491_c0_g1_i1	bHLH	208	gnl|BL_ORD_ID|296394TRIUR3_31817-P1 Triticum urartu|bHLH|bHLH family protein	296394	4.97651e-15	94.7368	71.2478	38	36
TRINITY_DN523618_c13_g1_i3	HD-ZIP	629	gnl|BL_ORD_ID|216651PH01000183G0940 Phyllostachys heterocycla|HD-ZIP|HD-ZIP family protein	216651	0.000257757	50.7463	44.2838	67	34
TRINITY_DN467831_c0_g6_i1	ZF-HD	213	gnl|BL_ORD_ID|269698Sopen05g016700.1 Solanum pennellii|ZF-HD|ZF-HD family protein	269698	1.80601e-06	58.8235	47.7506	51	30
TRINITY_DN475864_c5_g8_i1	M-type_MADS	238	gnl|BL_ORD_ID|198356LOC_Os11g12360.1 Oryza sativa subsp. japonica|M-type_MADS|M-type_MADS family protein	198356	0.000499074	48.4375	40.817	64	31
TRINITY_DN475314_c40_g9_i1	MYB	394	gnl|BL_ORD_ID|20470EMT24918 Aegilops tauschii|MYB_related|MYB_related family protein	20470	4.2886e-08	83.3333	54.299	36	30
TRINITY_DN436350_c0_g1_i1	ERF	272	gnl|BL_ORD_ID|291652XP_010556248.1 Tarenaya hassleriana|ERF|ERF family protein	291652	9.43426e-26	73.5632	104.76	87	64
TRINITY_DN565535_c0_g1_i1	ERF	235	gnl|BL_ORD_ID|240826Pavir.9NG087500.1.p Panicum virgatum|ERF|ERF family protein	240826	1.50963e-05	60	44.2838	40	24
TRINITY_DN241831_c0_g1_i1	FAR1	232	gnl|BL_ORD_ID|199065LOC_Os04g22990.1 Oryza sativa subsp. japonica|FAR1|FAR1 family protein	199065	1.98153e-26	75.3247	106.301	77	58
TRINITY_DN360069_c0_g1_i1	Trihelix	231	gnl|BL_ORD_ID|297027TRIUR3_33328-P1 Triticum urartu|Trihelix|Trihelix family protein	297027	3.05682e-10	63.0769	58.9214	65	41
TRINITY_DN384408_c2_g1_i3	NAC	201	gnl|BL_ORD_ID|296846TRIUR3_11787-P1 Triticum urartu|NAC|NAC family protein	296846	1.36461e-14	74.4681	70.4774	47	35
TRINITY_DN392737_c2_g3_i1	bHLH	215	gnl|BL_ORD_ID|20362EMT03170 Aegilops tauschii|bHLH|bHLH family protein	20362	7.19881e-05	68.5714	42.3578	35	24
TRINITY_DN405924_c1_g5_i1	Trihelix	219	gnl|BL_ORD_ID|297027TRIUR3_33328-P1 Triticum urartu|Trihelix|Trihelix family protein	297027	5.3694e-08	62.2951	52.373	61	38
TRINITY_DN415341_c0_g1_i1	M-type_MADS	206	gnl|BL_ORD_ID|198356LOC_Os11g12360.1 Oryza sativa subsp. japonica|M-type_MADS|M-type_MADS family protein	198356	1.06831e-26	85.5072	106.686	69	59
TRINITY_DN431765_c0_g1_i2	C2H2	262	gnl|BL_ORD_ID|50796XP_012575683.1 Cicer arietinum|C2H2|C2H2 family protein	50796	1.20533e-24	73.5632	101.293	87	64
TRINITY_DN437799_c1_g1_i1	M-type_MADS	220	gnl|BL_ORD_ID|198356LOC_Os11g12360.1 Oryza sativa subsp. japonica|M-type_MADS|M-type_MADS family protein	198356	2.86892e-25	80	102.834	70	56
TRINITY_DN441483_c2_g4_i5	B3	229	gnl|BL_ORD_ID|20166EMT01685 Aegilops tauschii|B3|B3 family protein	20166	1.95208e-08	68.0851	53.9138	47	32
TRINITY_DN444414_c1_g1_i1	NAC	209	gnl|BL_ORD_ID|296846TRIUR3_11787-P1 Triticum urartu|NAC|NAC family protein	296846	3.28739e-13	79.0698	66.6254	43	34
TRINITY_DN451689_c5_g7_i1	NAC	222	gnl|BL_ORD_ID|128048Itr_sc004419.1_g00003.1 Ipomoea trifida|NAC|NAC family protein	128048	9.91328e-10	54.0541	57.7658	74	40
TRINITY_DN458284_c1_g5_i1	TCP	213	gnl|BL_ORD_ID|270237Sopen12g015990.1 Solanum pennellii|TCP|TCP family protein	270237	2.51144e-21	87.3016	91.2781	63	55
TRINITY_DN459948_c2_g1_i3	ZF-HD	271	gnl|BL_ORD_ID|269698Sopen05g016700.1 Solanum pennellii|ZF-HD|ZF-HD family protein	269698	2.23064e-11	58.5366	63.1586	82	48
TRINITY_DN461728_c15_g1_i2	bZIP	267	gnl|BL_ORD_ID|230787model.Picochlorum_contig_146.g655.t1 Picochlorum sp. SENEW3|bZIP|bZIP family protein	230787	0.0449754	56.0976	34.2686	41	23
TRINITY_DN467481_c5_g1_i1	TCP	231	gnl|BL_ORD_ID|270237Sopen12g015990.1 Solanum pennellii|TCP|TCP family protein	270237	1.16898e-31	89.3333	121.324	75	67
TRINITY_DN468788_c5_g2_i4	ZF-HD	212	gnl|BL_ORD_ID|269698Sopen05g016700.1 Solanum pennellii|ZF-HD|ZF-HD family protein	269698	0.0370789	67.3077	34.6538	52	35
TRINITY_DN471115_c9_g5_i1	MYB	201	gnl|BL_ORD_ID|20187EMT20255 Aegilops tauschii|MYB|MYB family protein	20187	5.47224e-12	88.8889	62.3882	36	32
TRINITY_DN476544_c13_g3_i3	FAR1	343	gnl|BL_ORD_ID|199065LOC_Os04g22990.1 Oryza sativa subsp. japonica|FAR1|FAR1 family protein	199065	5.52574e-21	71.875	92.0485	96	69
TRINITY_DN478553_c2_g7_i1	ERF	339	gnl|BL_ORD_ID|291652XP_010556248.1 Tarenaya hassleriana|ERF|ERF family protein	291652	2.02159e-40	78.5714	147.902	112	88
TRINITY_DN478928_c13_g2_i1	M-type_MADS	202	gnl|BL_ORD_ID|198356LOC_Os11g12360.1 Oryza sativa subsp. japonica|M-type_MADS|M-type_MADS family protein	198356	6.44768e-07	68.8889	44.2838	45	31
TRINITY_DN479841_c12_g7_i1	B3	249	gnl|BL_ORD_ID|286701Traes_4AS_3698CBB71.1 Triticum aestivum|B3|B3 family protein	286701	0.0157872	48.7179	35.8094	78	38
TRINITY_DN487669_c4_g3_i1	ERF	218	gnl|BL_ORD_ID|291652XP_010556248.1 Tarenaya hassleriana|ERF|ERF family protein	291652	1.20103e-21	74.2857	92.0485	70	52
TRINITY_DN490351_c4_g2_i12	FAR1	209	gnl|BL_ORD_ID|199065LOC_Os04g22990.1 Oryza sativa subsp. japonica|FAR1|FAR1 family protein	199065	3.21969e-22	73.0159	93.5893	63	46
TRINITY_DN492965_c132_g5_i1	FAR1	210	gnl|BL_ORD_ID|199065LOC_Os04g22990.1 Oryza sativa subsp. japonica|FAR1|FAR1 family protein	199065	0.0048538	46.4789	37.3502	71	33
TRINITY_DN495608_c12_g1_i1	FAR1	210	gnl|BL_ORD_ID|199065LOC_Os04g22990.1 Oryza sativa subsp. japonica|FAR1|FAR1 family protein	199065	1.84554e-07	53.8462	50.8322	65	35
TRINITY_DN523733_c58_g2_i2	MYB	313	gnl|BL_ORD_ID|20187EMT20255 Aegilops tauschii|MYB|MYB family protein	20187	2.25335e-17	64.3836	78.5666	73	47
TRINITY_DN523745_c23_g1_i1	bHLH	232	gnl|BL_ORD_ID|296394TRIUR3_31817-P1 Triticum urartu|bHLH|bHLH family protein	296394	2.01141e-14	85.3659	69.707	41	35
TRINITY_DN468458_c2_g1_i1	GeBP protein	246	gnl|BL_ORD_ID|151491MDP0000189617 Malus domestica|GeBP|GeBP family protein	151491	0.000765521	56.9231	40.0466	65	37
TRINITY_DN313992_c2_g4_i2	AP2	301	gnl|BL_ORD_ID|209331PDK_30s782571g001 Phoenix dactylifera|AP2|AP2 family protein	209331	0.00910819	49.1228	36.965	57	28
TRINITY_DN495192_c1_g9_i4	HD-ZIP	296	gnl|BL_ORD_ID|269681Sopen09g021360.1 Solanum pennellii|HD-ZIP|HD-ZIP family protein	269681	8.43863e-38	80.6122	140.198	98	79
TRINITY_DN523469_c1_g1_i1	C3H	576	gnl|BL_ORD_ID|186640KN539785.1_FGP001 Oryza longistaminata|C3H|C3H family protein	186640	0.000113716	51.0204	45.0542	98	50
TRINITY_DN481989_c3_g9_i2	LBD	245	gnl|BL_ORD_ID|250519Rsa1.0_02878.1_g00005.1 Raphanus sativus|LBD|LBD family protein	250519	1.11146e-08	52.6316	54.6842	76	40
TRINITY_DN523237_c18_g4_i1	TCP	363	gnl|BL_ORD_ID|270237Sopen12g015990.1 Solanum pennellii|TCP|TCP family protein	270237	1.34425e-07	51.938	52.7582	129	67
TRINITY_DN481320_c2_g6_i1	M-type_MADS	425	gnl|BL_ORD_ID|198356LOC_Os11g12360.1 Oryza sativa subsp. japonica|M-type_MADS|M-type_MADS family protein	198356	1.49861e-51	80.8	181.8	125	101
TRINITY_DN473014_c12_g9_i1	FAR1	201	gnl|BL_ORD_ID|199065LOC_Os04g22990.1 Oryza sativa subsp. japonica|FAR1|FAR1 family protein	199065	2.82002e-19	75.4098	85.1149	61	46
TRINITY_DN493810_c7_g6_i4	FAR1	336	gnl|BL_ORD_ID|199065LOC_Os04g22990.1 Oryza sativa subsp. japonica|FAR1|FAR1 family protein	199065	0.00223302	60.7843	39.2762	51	31
TRINITY_DN421190_c2_g5_i3	ZF-HD	249	gnl|BL_ORD_ID|269698Sopen05g016700.1 Solanum pennellii|ZF-HD|ZF-HD family protein	269698	0.00104516	64.4444	39.6614	45	29
TRINITY_DN468786_c3_g2_i5	ZF-HD	372	gnl|BL_ORD_ID|269698Sopen05g016700.1 Solanum pennellii|ZF-HD|ZF-HD family protein	269698	1.44035e-12	54.4554	67.781	101	55
TRINITY_DN437383_c13_g5_i1	bHLH	396	gnl|BL_ORD_ID|271991Sopim06g008030.0.1 Solanum pimpinellifolium|bHLH|bHLH family protein	271991	0.0426321	50	35.8094	60	30
TRINITY_DN522831_c0_g4_i1	M-type_MADS	942	gnl|BL_ORD_ID|198356LOC_Os11g12360.1 Oryza sativa subsp. japonica|M-type_MADS|M-type_MADS family protein	198356	5.75463e-06	45.4545	51.2174	154	70
TRINITY_DN349636_c0_g2_i1	LBD	224	gnl|BL_ORD_ID|209211PDK_30s759331g002 Phoenix dactylifera|LBD|LBD family protein	209211	9.96551e-12	56.6265	63.1586	83	47
TRINITY_DN369793_c0_g1_i2	B3	226	gnl|BL_ORD_ID|270192Sopen00g003940.1 Solanum pennellii|B3|B3 family protein	270192	0.00416302	56	37.7354	75	42
TRINITY_DN389321_c1_g3_i1	ZF-HD	220	gnl|BL_ORD_ID|269698Sopen05g016700.1 Solanum pennellii|ZF-HD|ZF-HD family protein	269698	2.04219e-07	58.3333	50.8322	72	42
TRINITY_DN444082_c4_g2_i1	NAC	214	gnl|BL_ORD_ID|21294EMT28823 Aegilops tauschii|NAC|NAC family protein	21294	0.0115903	56	35.8094	50	28
TRINITY_DN446409_c4_g2_i1	FAR1	211	gnl|BL_ORD_ID|82637Dca43462.1 Dianthus caryophyllus|FAR1|FAR1 family protein	82637	0.000439131	54.5455	40.4318	55	30
TRINITY_DN458284_c1_g4_i1	TCP	253	gnl|BL_ORD_ID|270237Sopen12g015990.1 Solanum pennellii|TCP|TCP family protein	270237	3.1913e-24	78.5714	100.138	84	66
TRINITY_DN460617_c5_g2_i2	FAR1	366	gnl|BL_ORD_ID|199065LOC_Os04g22990.1 Oryza sativa subsp. japonica|FAR1|FAR1 family protein	199065	7.57938e-45	74.5763	161.384	118	88
TRINITY_DN460835_c5_g1_i1	FAR1	303	gnl|BL_ORD_ID|199065LOC_Os04g22990.1 Oryza sativa subsp. japonica|FAR1|FAR1 family protein	199065	0.00013945	53.7313	42.743	67	36
TRINITY_DN463333_c2_g2_i2	FAR1	256	gnl|BL_ORD_ID|199065LOC_Os04g22990.1 Oryza sativa subsp. japonica|FAR1|FAR1 family protein	199065	0.00567327	60	37.3502	50	30
TRINITY_DN467593_c61_g20_i5	FAR1	338	gnl|BL_ORD_ID|199065LOC_Os04g22990.1 Oryza sativa subsp. japonica|FAR1|FAR1 family protein	199065	1.30034e-41	79.2453	151.754	106	84
TRINITY_DN469747_c3_g6_i1	FAR1	309	gnl|BL_ORD_ID|199065LOC_Os04g22990.1 Oryza sativa subsp. japonica|FAR1|FAR1 family protein	199065	4.74745e-27	70.6522	109.383	92	65
TRINITY_DN477924_c54_g1_i2	B3	534	gnl|BL_ORD_ID|297270TRIUR3_16915-P1 Triticum urartu|B3|B3 family protein	297270	0.00163013	60.4651	41.2022	43	26
TRINITY_DN478272_c25_g2_i7	MYB	214	gnl|BL_ORD_ID|20187EMT20255 Aegilops tauschii|MYB|MYB family protein	20187	0.0170968	63.1579	35.4242	38	24
TRINITY_DN478883_c21_g4_i1	B3	209	gnl|BL_ORD_ID|26683Bradi1g70067.1.p Brachypodium distachyon|B3|B3 family protein	26683	0.000190534	63.8889	40.817	36	23
TRINITY_DN479860_c8_g8_i1	NAC	227	gnl|BL_ORD_ID|128048Itr_sc004419.1_g00003.1 Ipomoea trifida|NAC|NAC family protein	128048	3.7355e-10	58.4615	58.9214	65	38
TRINITY_DN480658_c3_g1_i3	NAC	428	gnl|BL_ORD_ID|128048Itr_sc004419.1_g00003.1 Ipomoea trifida|NAC|NAC family protein	128048	1.04031e-30	61.7021	121.709	141	87
TRINITY_DN481297_c4_g5_i1	MYB	274	gnl|BL_ORD_ID|20187EMT20255 Aegilops tauschii|MYB|MYB family protein	20187	6.53139e-13	70.8333	65.855	48	34
TRINITY_DN481420_c5_g9_i10	bZIP	319	gnl|BL_ORD_ID|296570TRIUR3_29751-P1 Triticum urartu|bZIP|bZIP family protein	296570	3.90196e-05	82.0513	43.5134	39	32
TRINITY_DN484876_c8_g7_i2	TCP	220	gnl|BL_ORD_ID|270237Sopen12g015990.1 Solanum pennellii|TCP|TCP family protein	270237	7.92558e-35	93.1507	130.183	73	68
TRINITY_DN490197_c4_g9_i1	HSF	252	gnl|BL_ORD_ID|296654TRIUR3_19594-P1 Triticum urartu|HSF|HSF family protein	296654	6.13907e-23	97.7273	95.1301	44	43
TRINITY_DN497434_c1_g3_i1	TCP	211	gnl|BL_ORD_ID|270237Sopen12g015990.1 Solanum pennellii|TCP|TCP family protein	270237	0.00509961	60.4651	37.3502	43	26
TRINITY_DN498084_c5_g2_i14	B3	281	gnl|BL_ORD_ID|269643Sopen03g007470.1 Solanum pennellii|B3|B3 family protein	269643	5.91321e-12	43.3333	64.6994	90	39
TRINITY_DN50205_c0_g2_i1	NAC	218	gnl|BL_ORD_ID|296846TRIUR3_11787-P1 Triticum urartu|NAC|NAC family protein	296846	1.8864e-18	97.3684	81.6481	38	37
TRINITY_DN508190_c2_g1_i1	FAR1	227	gnl|BL_ORD_ID|199065LOC_Os04g22990.1 Oryza sativa subsp. japonica|FAR1|FAR1 family protein	199065	1.63832e-23	73.6111	97.8265	72	53
TRINITY_DN515114_c7_g1_i14	TCP	360	gnl|BL_ORD_ID|270237Sopen12g015990.1 Solanum pennellii|TCP|TCP family protein	270237	3.93727e-51	87.156	179.489	109	95
TRINITY_DN474565_c12_g2_i1	bHLH	219	gnl|BL_ORD_ID|20362EMT03170 Aegilops tauschii|bHLH|bHLH family protein	20362	1.09573e-15	82.9268	72.0182	41	34
TRINITY_DN434458_c0_g1_i1	G2-like	214	gnl|BL_ORD_ID|269678Sopen11g010100.1 Solanum pennellii|G2-like|G2-like family protein	269678	0.0225713	62.5	35.4242	48	30
TRINITY_DN523813_c77_g2_i7	NAC	381	gnl|BL_ORD_ID|128048Itr_sc004419.1_g00003.1 Ipomoea trifida|NAC|NAC family protein	128048	1.87146e-17	58.3333	82.4185	120	70
TRINITY_DN521195_c1_g4_i1	M-type_MADS	393	gnl|BL_ORD_ID|198356LOC_Os11g12360.1 Oryza sativa subsp. japonica|M-type_MADS|M-type_MADS family protein	198356	1.77952e-11	50	64.6994	124	62
TRINITY_DN523870_c20_g3_i1	M-type_MADS	4383	gnl|BL_ORD_ID|198356LOC_Os11g12360.1 Oryza sativa subsp. japonica|M-type_MADS|M-type_MADS family protein	198356	4.07539e-107	46.968	381.719	907	426
TRINITY_DN467582_c9_g2_i1	C2H2	204	gnl|BL_ORD_ID|264449Sme2.5_01070.1_g00005.1 Solanum melongena|C2H2|C2H2 family protein	264449	3.19237e-18	74.6269	82.0333	67	50
TRINITY_DN437051_c3_g1_i9	NAC	260	gnl|BL_ORD_ID|128048Itr_sc004419.1_g00003.1 Ipomoea trifida|NAC|NAC family protein	128048	8.1287e-16	59.3023	75.8702	86	51
TRINITY_DN510476_c4_g3_i1	M-type_MADS	213	gnl|BL_ORD_ID|198356LOC_Os11g12360.1 Oryza sativa subsp. japonica|M-type_MADS|M-type_MADS family protein	198356	0.00269257	55.5556	38.1206	54	30
TRINITY_DN377942_c0_g1_i1	MYB	245	gnl|BL_ORD_ID|20187EMT20255 Aegilops tauschii|MYB|MYB family protein	20187	3.17403e-40	87.6543	140.198	81	71
TRINITY_DN364519_c0_g2_i1	FAR1	216	gnl|BL_ORD_ID|199065LOC_Os04g22990.1 Oryza sativa subsp. japonica|FAR1|FAR1 family protein	199065	3.37094e-27	79.1667	108.227	72	57
TRINITY_DN481320_c2_g5_i1	B3	376	gnl|BL_ORD_ID|21204EMT30739 Aegilops tauschii|B3|B3 family protein	21204	7.35275e-23	84.127	95.5153	63	53
TRINITY_DN495191_c3_g1_i9	ERF	417	gnl|BL_ORD_ID|291652XP_010556248.1 Tarenaya hassleriana|ERF|ERF family protein	291652	9.57556e-49	72.9927	172.94	137	100
TRINITY_DN223181_c0_g1_i2	ERF	237	gnl|BL_ORD_ID|291652XP_010556248.1 Tarenaya hassleriana|ERF|ERF family protein	291652	9.54206e-28	83.1169	109.768	77	64
TRINITY_DN274142_c1_g1_i4	NF-YC	223	gnl|BL_ORD_ID|269751Sopen03g030560.1 Solanum pennellii|NF-YC|NF-YC family protein	269751	2.72635e-09	58.9041	56.225	73	43
TRINITY_DN287246_c0_g1_i1	M-type_MADS	211	gnl|BL_ORD_ID|198356LOC_Os11g12360.1 Oryza sativa subsp. japonica|M-type_MADS|M-type_MADS family protein	198356	2.77627e-20	70.4225	88.1965	71	50
TRINITY_DN402931_c0_g1_i1	MYB	224	gnl|BL_ORD_ID|20187EMT20255 Aegilops tauschii|MYB|MYB family protein	20187	1.38957e-08	75	53.1434	40	30
TRINITY_DN415558_c1_g1_i1	FAR1	246	gnl|BL_ORD_ID|82637Dca43462.1 Dianthus caryophyllus|FAR1|FAR1 family protein	82637	0.0305807	47.619	35.039	63	30
TRINITY_DN439875_c1_g2_i1	M-type_MADS	220	gnl|BL_ORD_ID|198356LOC_Os11g12360.1 Oryza sativa subsp. japonica|M-type_MADS|M-type_MADS family protein	198356	3.10627e-33	87.5	125.561	72	63
TRINITY_DN443697_c2_g3_i3	NAC	287	gnl|BL_ORD_ID|128048Itr_sc004419.1_g00003.1 Ipomoea trifida|NAC|NAC family protein	128048	1.30009e-15	60	75.8702	95	57
TRINITY_DN449673_c15_g1_i2	HD-ZIP	223	gnl|BL_ORD_ID|269681Sopen09g021360.1 Solanum pennellii|HD-ZIP|HD-ZIP family protein	269681	3.67107e-29	83.5616	114.005	73	61
TRINITY_DN456088_c12_g2_i4	ZF-HD	313	gnl|BL_ORD_ID|269698Sopen05g016700.1 Solanum pennellii|ZF-HD|ZF-HD family protein	269698	2.27796e-05	64.4444	45.4394	45	29
TRINITY_DN473823_c1_g2_i5	TCP	260	gnl|BL_ORD_ID|270237Sopen12g015990.1 Solanum pennellii|TCP|TCP family protein	270237	1.77156e-20	70.8333	89.7373	96	68
TRINITY_DN474764_c4_g6_i1	WRKY	299	gnl|BL_ORD_ID|296164TRIUR3_24639-P1 Triticum urartu|WRKY|WRKY family protein	296164	9.39382e-12	59.3023	63.1586	86	51
TRINITY_DN475368_c0_g6_i1	M-type_MADS	209	gnl|BL_ORD_ID|198356LOC_Os11g12360.1 Oryza sativa subsp. japonica|M-type_MADS|M-type_MADS family protein	198356	2.07566e-10	59.4203	59.6918	69	41
TRINITY_DN482945_c8_g3_i16	FAR1	262	gnl|BL_ORD_ID|199065LOC_Os04g22990.1 Oryza sativa subsp. japonica|FAR1|FAR1 family protein	199065	5.07959e-24	72.619	99.7525	84	61
TRINITY_DN487733_c14_g1_i1	B3	289	gnl|BL_ORD_ID|98894mrna24052.1-v1.0-hybrid Fragaria vesca|B3|B3 family protein	98894	4.44302e-07	58.5714	50.447	70	41
TRINITY_DN490110_c13_g4_i1	HD-ZIP	232	gnl|BL_ORD_ID|216651PH01000183G0940 Phyllostachys heterocycla|HD-ZIP|HD-ZIP family protein	216651	0.0105188	50	36.5798	64	32
TRINITY_DN494761_c3_g2_i1	TCP	484	gnl|BL_ORD_ID|270237Sopen12g015990.1 Solanum pennellii|TCP|TCP family protein	270237	2.20641e-65	77.2152	222.246	158	122
TRINITY_DN495050_c1_g4_i2	HD-ZIP	314	gnl|BL_ORD_ID|269681Sopen09g021360.1 Solanum pennellii|HD-ZIP|HD-ZIP family protein	269681	5.26775e-27	68.0851	109.383	94	64
TRINITY_DN496245_c19_g1_i1	B3	229	gnl|BL_ORD_ID|269643Sopen03g007470.1 Solanum pennellii|B3|B3 family protein	269643	1.81437e-12	50.6667	65.4698	75	38
TRINITY_DN516816_c4_g1_i1	TCP	207	gnl|BL_ORD_ID|270237Sopen12g015990.1 Solanum pennellii|TCP|TCP family protein	270237	8.39538e-29	83.8235	112.849	68	57
TRINITY_DN520999_c17_g2_i2	M-type_MADS	254	gnl|BL_ORD_ID|198356LOC_Os11g12360.1 Oryza sativa subsp. japonica|M-type_MADS|M-type_MADS family protein	198356	0.00198135	52.9412	38.891	85	45
TRINITY_DN523883_c16_g6_i1	ERF	296	gnl|BL_ORD_ID|291652XP_010556248.1 Tarenaya hassleriana|ERF|ERF family protein	291652	7.15084e-36	78.5714	134.035	98	77
TRINITY_DN573433_c0_g1_i1	bZIP	347	gnl|BL_ORD_ID|197506LOC_Os12g06010.1 Oryza sativa subsp. japonica|bZIP|bZIP family protein	197506	5.80434e-10	59.2105	59.6918	76	45
TRINITY_DN439852_c0_g1_i4	MIKC_MADS	235	gnl|BL_ORD_ID|129813Jcr4S00018.10 Jatropha curcas|MIKC_MADS|MIKC_MADS family protein	129813	9.4335e-07	50.8772	48.9062	57	29
TRINITY_DN471115_c9_g3_i2	MYB	226	gnl|BL_ORD_ID|20187EMT20255 Aegilops tauschii|MYB|MYB family protein	20187	1.22043e-33	83.7838	122.094	74	62
TRINITY_DN509386_c4_g8_i9	CO-like	1637	gnl|BL_ORD_ID|2019AA31G00555 Aethionema arabicum|CO-like|CO-like family protein	2019	6.34536e-08	41.1504	58.9214	226	93
TRINITY_DN393306_c0_g1_i1	TCP	247	gnl|BL_ORD_ID|269425Sopen05g005700.1 Solanum pennellii|TCP|TCP family protein	269425	8.53846e-16	62.1951	75.485	82	51
TRINITY_DN299846_c0_g1_i1	G2-like	201	gnl|BL_ORD_ID|269678Sopen11g010100.1 Solanum pennellii|G2-like|G2-like family protein	269678	2.98147e-08	63.3333	52.7582	60	38
TRINITY_DN467212_c1_g5_i2	HD-ZIP	213	gnl|BL_ORD_ID|269681Sopen09g021360.1 Solanum pennellii|HD-ZIP|HD-ZIP family protein	269681	2.43974e-25	86.6667	102.834	60	52
TRINITY_DN488339_c18_g5_i5	M-type_MADS	836	gnl|BL_ORD_ID|278710PGSC0003DMP400020035 Solanum tuberosum|M-type_MADS|M-type_MADS family protein	278710	0.0455206	55.7692	38.1206	52	29
TRINITY_DN468458_c5_g2_i2	GRAS	242	gnl|BL_ORD_ID|296836TRIUR3_07891-P1 Triticum urartu|GRAS|GRAS family protein	296836	2.8383e-06	62.963	46.9802	54	34
TRINITY_DN489954_c4_g1_i1	bZIP	239	gnl|BL_ORD_ID|20588EMT09034 Aegilops tauschii|bZIP|bZIP family protein	20588	3.70276e-05	73.8095	43.5134	42	31
TRINITY_DN319188_c1_g1_i4	ZF-HD	304	gnl|BL_ORD_ID|269698Sopen05g016700.1 Solanum pennellii|ZF-HD|ZF-HD family protein	269698	2.16419e-29	69.5238	115.931	105	73
TRINITY_DN225441_c0_g1_i1	TCP	213	gnl|BL_ORD_ID|270237Sopen12g015990.1 Solanum pennellii|TCP|TCP family protein	270237	2.40993e-15	73.4375	73.9442	64	47
TRINITY_DN290105_c2_g2_i5	NAC	224	gnl|BL_ORD_ID|128048Itr_sc004419.1_g00003.1 Ipomoea trifida|NAC|NAC family protein	128048	1.61957e-11	63.6364	63.1586	66	42
TRINITY_DN386418_c0_g1_i1	NAC	208	gnl|BL_ORD_ID|128048Itr_sc004419.1_g00003.1 Ipomoea trifida|NAC|NAC family protein	128048	6.36616e-07	64.2857	49.2914	56	36
TRINITY_DN459612_c6_g1_i1	C2H2	230	gnl|BL_ORD_ID|21127EMT02428 Aegilops tauschii|C2H2|C2H2 family protein	21127	1.71954e-07	54.9296	48.9062	71	39
TRINITY_DN463395_c7_g3_i2	NAC	297	gnl|BL_ORD_ID|128048Itr_sc004419.1_g00003.1 Ipomoea trifida|NAC|NAC family protein	128048	5.30461e-17	62.2449	80.1073	98	61
TRINITY_DN468108_c1_g7_i1	M-type_MADS	212	gnl|BL_ORD_ID|198356LOC_Os11g12360.1 Oryza sativa subsp. japonica|M-type_MADS|M-type_MADS family protein	198356	1.30002e-13	62.8571	68.9366	70	44
TRINITY_DN468511_c4_g1_i1	FAR1	222	gnl|BL_ORD_ID|199065LOC_Os04g22990.1 Oryza sativa subsp. japonica|FAR1|FAR1 family protein	199065	8.66379e-25	75.3425	101.293	73	55
TRINITY_DN468737_c14_g6_i1	ZF-HD	377	gnl|BL_ORD_ID|269698Sopen05g016700.1 Solanum pennellii|ZF-HD|ZF-HD family protein	269698	0.00230831	50	39.6614	60	30
TRINITY_DN468788_c5_g2_i1	NAC	250	gnl|BL_ORD_ID|128048Itr_sc004419.1_g00003.1 Ipomoea trifida|NAC|NAC family protein	128048	2.16899e-08	57.5758	53.9138	66	38
TRINITY_DN472542_c9_g2_i2	NAC	317	gnl|BL_ORD_ID|296846TRIUR3_11787-P1 Triticum urartu|NAC|NAC family protein	296846	1.72889e-15	81.25	74.7146	48	39
TRINITY_DN472781_c11_g1_i1	C2H2	254	gnl|BL_ORD_ID|297126TRIUR3_34542-P1 Triticum urartu|C2H2|C2H2 family protein	297126	3.44387e-14	80.597	70.0922	67	54
TRINITY_DN473962_c4_g1_i3	HD-ZIP	306	gnl|BL_ORD_ID|216651PH01000183G0940 Phyllostachys heterocycla|HD-ZIP|HD-ZIP family protein	216651	2.77402e-05	46.3768	45.0542	69	32
TRINITY_DN484653_c4_g4_i3	TCP	230	gnl|BL_ORD_ID|270237Sopen12g015990.1 Solanum pennellii|TCP|TCP family protein	270237	2.331e-25	77.6316	103.219	76	59
TRINITY_DN487050_c9_g1_i3	HD-ZIP	374	gnl|BL_ORD_ID|216651PH01000183G0940 Phyllostachys heterocycla|HD-ZIP|HD-ZIP family protein	216651	0.00408516	47.4576	38.891	59	28
TRINITY_DN489543_c21_g14_i1	MYB	287	gnl|BL_ORD_ID|20187EMT20255 Aegilops tauschii|MYB|MYB family protein	20187	1.34208e-17	81.6327	78.9518	49	40
TRINITY_DN491626_c11_g2_i2	MYB	239	gnl|BL_ORD_ID|315961Zmw_sc03099.1.g00040.1 Zoysia matrella|MYB_related|MYB_related family protein	315961	0.00664145	50	36.5798	60	30
TRINITY_DN496915_c2_g1_i1	bHLH	215	gnl|BL_ORD_ID|203262MA_97786g0010 Picea abies|bHLH|bHLH family protein	203262	0.0196828	57.1429	35.039	35	20
TRINITY_DN504494_c0_g1_i1	TCP	211	gnl|BL_ORD_ID|269425Sopen05g005700.1 Solanum pennellii|TCP|TCP family protein	269425	5.48177e-08	56.9444	52.373	72	41
TRINITY_DN510029_c4_g1_i1	MYB	233	gnl|BL_ORD_ID|296368TRIUR3_21241-P1 Triticum urartu|MYB|MYB family protein	296368	1.88301e-23	87.931	95.1301	58	51
TRINITY_DN516349_c8_g2_i1	HD-ZIP	208	gnl|BL_ORD_ID|269681Sopen09g021360.1 Solanum pennellii|HD-ZIP|HD-ZIP family protein	269681	3.67813e-27	85.4839	107.842	62	53
TRINITY_DN519423_c8_g3_i1	M-type_MADS	231	gnl|BL_ORD_ID|69014evm.TU.contig_31285.1 Carica papaya|M-type_MADS|M-type_MADS family protein	69014	0.0412426	51.6667	34.2686	60	31
TRINITY_DN523486_c91_g6_i6	NAC	210	gnl|BL_ORD_ID|128048Itr_sc004419.1_g00003.1 Ipomoea trifida|NAC|NAC family protein	128048	0.000451494	53.0303	40.4318	66	35
TRINITY_DN455121_c0_g5_i1	ZF-HD	263	gnl|BL_ORD_ID|269698Sopen05g016700.1 Solanum pennellii|ZF-HD|ZF-HD family protein	269698	1.15372e-34	82.7586	130.568	87	72
TRINITY_DN472298_c16_g9_i1	B3	201	gnl|BL_ORD_ID|297270TRIUR3_16915-P1 Triticum urartu|B3|B3 family protein	297270	3.04143e-15	80	72.7886	45	36
TRINITY_DN498538_c8_g3_i4	TCP	299	gnl|BL_ORD_ID|269425Sopen05g005700.1 Solanum pennellii|TCP|TCP family protein	269425	5.77398e-30	74.7475	117.087	99	74
TRINITY_DN341590_c0_g1_i1	ZF-HD	206	gnl|BL_ORD_ID|269698Sopen05g016700.1 Solanum pennellii|ZF-HD|ZF-HD family protein	269698	1.92575e-26	88.0597	105.916	67	59
TRINITY_DN487651_c0_g4_i1	NAC	269	gnl|BL_ORD_ID|35195XP_013639656.1 Brassica oleracea|NAC|NAC family protein	35195	0.0191215	58.8235	35.8094	51	30
TRINITY_DN430374_c0_g3_i1	GRAS	255	gnl|BL_ORD_ID|296836TRIUR3_07891-P1 Triticum urartu|GRAS|GRAS family protein	296836	1.04603e-16	88.8889	77.0258	36	32
TRINITY_DN513738_c50_g3_i1	HB-other	314	gnl|BL_ORD_ID|22349AT4G02560.2 Arabidopsis thaliana|HB-other|HB-other family protein	22349	5.37307e-07	67.3469	50.447	49	33
TRINITY_DN487532_c10_g1_i1	FAR1	270	gnl|BL_ORD_ID|199065LOC_Os04g22990.1 Oryza sativa subsp. japonica|FAR1|FAR1 family protein	199065	9.35426e-28	70.7865	110.923	89	63
TRINITY_DN412963_c0_g2_i1	WRKY	225	gnl|BL_ORD_ID|250373Rsa1.0_07654.1_g00001.1 Raphanus sativus|WRKY|WRKY family protein	250373	3.6763e-18	63.0137	82.0333	73	46
TRINITY_DN519360_c21_g9_i4	M-type_MADS	503	gnl|BL_ORD_ID|198356LOC_Os11g12360.1 Oryza sativa subsp. japonica|M-type_MADS|M-type_MADS family protein	198356	5.36478e-46	61.1429	166.777	175	107
TRINITY_DN199173_c1_g1_i1	bHLH	238	gnl|BL_ORD_ID|296394TRIUR3_31817-P1 Triticum urartu|bHLH|bHLH family protein	296394	2.15771e-16	86.9565	75.0998	46	40
TRINITY_DN289248_c2_g1_i1	NAC	207	gnl|BL_ORD_ID|21294EMT28823 Aegilops tauschii|NAC|NAC family protein	21294	0.00244015	54	38.1206	50	27
TRINITY_DN332468_c1_g1_i2	GATA	215	gnl|BL_ORD_ID|296559TRIUR3_22272-P1 Triticum urartu|GATA|GATA family protein	296559	5.47078e-16	87.234	74.7146	47	41
TRINITY_DN446321_c1_g1_i1	TCP	226	gnl|BL_ORD_ID|270237Sopen12g015990.1 Solanum pennellii|TCP|TCP family protein	270237	2.38925e-26	78.3784	105.916	74	58
TRINITY_DN460007_c1_g4_i1	FAR1	220	gnl|BL_ORD_ID|199065LOC_Os04g22990.1 Oryza sativa subsp. japonica|FAR1|FAR1 family protein	199065	1.17574e-20	70.8333	89.3521	72	51
TRINITY_DN470469_c1_g4_i1	TCP	255	gnl|BL_ORD_ID|270237Sopen12g015990.1 Solanum pennellii|TCP|TCP family protein	270237	3.17343e-09	60.9375	56.6102	64	39
TRINITY_DN471946_c7_g2_i1	FAR1	278	gnl|BL_ORD_ID|199065LOC_Os04g22990.1 Oryza sativa subsp. japonica|FAR1|FAR1 family protein	199065	1.74607e-08	50.5376	54.6842	93	47
TRINITY_DN480757_c2_g1_i1	FAR1	204	gnl|BL_ORD_ID|199065LOC_Os04g22990.1 Oryza sativa subsp. japonica|FAR1|FAR1 family protein	199065	0.000765802	60	39.6614	50	30
TRINITY_DN482642_c2_g8_i1	FAR1	209	gnl|BL_ORD_ID|199065LOC_Os04g22990.1 Oryza sativa subsp. japonica|FAR1|FAR1 family protein	199065	1.04669e-22	72.4638	95.1301	69	50
TRINITY_DN484772_c2_g5_i1	MYB	235	gnl|BL_ORD_ID|50181XP_012569912.1 Cicer arietinum|MYB_related|MYB_related family protein	50181	0.0440931	48.3871	34.2686	62	30
TRINITY_DN487346_c7_g1_i2	NAC	228	gnl|BL_ORD_ID|296846TRIUR3_11787-P1 Triticum urartu|NAC|NAC family protein	296846	0.00216804	45.7627	38.5058	59	27
TRINITY_DN487384_c3_g6_i2	HD-ZIP	262	gnl|BL_ORD_ID|269681Sopen09g021360.1 Solanum pennellii|HD-ZIP|HD-ZIP family protein	269681	3.2422e-36	81.3953	134.806	86	70
TRINITY_DN491100_c11_g2_i1	FAR1	221	gnl|BL_ORD_ID|199065LOC_Os04g22990.1 Oryza sativa subsp. japonica|FAR1|FAR1 family protein	199065	9.24395e-21	70.8333	89.7373	72	51
TRINITY_DN511973_c22_g4_i1	MYB	201	gnl|BL_ORD_ID|20187EMT20255 Aegilops tauschii|MYB|MYB family protein	20187	6.08127e-12	86.1111	62.3882	36	31
TRINITY_DN514250_c2_g5_i1	TCP	433	gnl|BL_ORD_ID|270237Sopen12g015990.1 Solanum pennellii|TCP|TCP family protein	270237	7.78612e-60	78.4722	205.682	144	113
TRINITY_DN523813_c76_g8_i1	FAR1	262	gnl|BL_ORD_ID|199065LOC_Os04g22990.1 Oryza sativa subsp. japonica|FAR1|FAR1 family protein	199065	7.59767e-23	68.6047	96.2857	86	59
TRINITY_DN448773_c2_g1_i2	GRAS	250	gnl|BL_ORD_ID|296836TRIUR3_07891-P1 Triticum urartu|GRAS|GRAS family protein	296836	6.5149e-17	88.8889	77.411	36	32
TRINITY_DN385996_c0_g1_i2	ERF	216	gnl|BL_ORD_ID|270781Sopen11g017580.1 Solanum pennellii|ERF|ERF family protein	270781	3.50847e-17	69.0141	79.337	71	49
TRINITY_DN516349_c8_g3_i14	HD-ZIP	476	gnl|BL_ORD_ID|269681Sopen09g021360.1 Solanum pennellii|HD-ZIP|HD-ZIP family protein	269681	5.41683e-55	80.8917	192.2	157	127
TRINITY_DN523911_c2_g2_i1	B3	3707	gnl|BL_ORD_ID|284217Traes_6AS_39EE7AF68.3 Triticum aestivum|B3|B3 family protein	284217	1.27788e-12	49.3902	72.4034	164	81
TRINITY_DN392871_c0_g1_i1	bHLH	306	gnl|BL_ORD_ID|296394TRIUR3_31817-P1 Triticum urartu|bHLH|bHLH family protein	296394	7.25229e-21	93.75	88.1965	48	45
TRINITY_DN136157_c0_g1_i1	C2H2	272	gnl|BL_ORD_ID|297126TRIUR3_34542-P1 Triticum urartu|C2H2|C2H2 family protein	297126	1.70558e-17	74.6479	79.7221	71	53
TRINITY_DN301118_c0_g1_i1	ZF-HD	204	gnl|BL_ORD_ID|269698Sopen05g016700.1 Solanum pennellii|ZF-HD|ZF-HD family protein	269698	0.0120678	55.102	36.1946	49	27
TRINITY_DN361398_c0_g1_i1	GRAS	204	gnl|BL_ORD_ID|296836TRIUR3_07891-P1 Triticum urartu|GRAS|GRAS family protein	296836	1.59449e-11	72.1311	61.6178	61	44
TRINITY_DN423075_c0_g1_i2	ZF-HD	323	gnl|BL_ORD_ID|269698Sopen05g016700.1 Solanum pennellii|ZF-HD|ZF-HD family protein	269698	0.00989059	60	37.3502	45	27
TRINITY_DN443238_c0_g1_i1	NAC	213	gnl|BL_ORD_ID|216676PH01002611G0200 Phyllostachys heterocycla|NAC|NAC family protein	216676	1.02721e-12	76.7442	65.0846	43	33
TRINITY_DN455876_c2_g2_i3	C2H2	286	gnl|BL_ORD_ID|297126TRIUR3_34542-P1 Triticum urartu|C2H2|C2H2 family protein	297126	0.00186278	72.973	38.891	37	27
TRINITY_DN458069_c6_g5_i1	NAC	214	gnl|BL_ORD_ID|20708EMT33859 Aegilops tauschii|NAC|NAC family protein	20708	5.35455e-08	59.322	51.9878	59	35
TRINITY_DN463364_c0_g2_i1	EIL	224	gnl|BL_ORD_ID|296967TRIUR3_20987-P1 Triticum urartu|EIL|EIL family protein	296967	0.000123201	54.902	41.9726	51	28
TRINITY_DN468719_c12_g8_i1	MYB	251	gnl|BL_ORD_ID|20187EMT20255 Aegilops tauschii|MYB|MYB family protein	20187	2.77611e-37	81.9277	132.494	83	68
TRINITY_DN475351_c5_g1_i1	G2-like	202	gnl|BL_ORD_ID|296938TRIUR3_23402-P1 Triticum urartu|G2-like|G2-like family protein	296938	0.00228243	52.381	38.1206	63	33
TRINITY_DN484188_c8_g4_i1	ERF	219	gnl|BL_ORD_ID|291652XP_010556248.1 Tarenaya hassleriana|ERF|ERF family protein	291652	4.79647e-09	72.8814	55.4546	59	43
TRINITY_DN488028_c0_g7_i1	bHLH	221	gnl|BL_ORD_ID|132098Kaladp0095s0555.1.p Kalanchoe laxiflora|bHLH|bHLH family protein	132098	0.0374602	46	34.2686	50	23
TRINITY_DN498858_c7_g1_i1	B3	358	gnl|BL_ORD_ID|20166EMT01685 Aegilops tauschii|B3|B3 family protein	20166	0.000593216	49.2754	41.2022	69	34
TRINITY_DN505465_c6_g14_i3	M-type_MADS	260	gnl|BL_ORD_ID|198356LOC_Os11g12360.1 Oryza sativa subsp. japonica|M-type_MADS|M-type_MADS family protein	198356	7.61016e-16	66.6667	76.2554	84	56
TRINITY_DN519560_c40_g4_i2	NAC	236	gnl|BL_ORD_ID|35195XP_013639656.1 Brassica oleracea|NAC|NAC family protein	35195	0.00178999	47.5	38.5058	80	38
TRINITY_DN521022_c15_g8_i2	WRKY	520	gnl|BL_ORD_ID|20112EMT18192 Aegilops tauschii|WRKY|WRKY family protein	20112	9.05755e-13	92.1875	68.5514	64	59
TRINITY_DN523813_c81_g3_i5	MYB	554	gnl|BL_ORD_ID|20187EMT20255 Aegilops tauschii|MYB|MYB family protein	20187	1.34892e-22	62.8866	95.9005	97	61
TRINITY_DN500094_c13_g8_i2	FAR1	280	gnl|BL_ORD_ID|21158EMT21149 Aegilops tauschii|FAR1|FAR1 family protein	21158	1.15566e-07	73.3333	51.9878	45	33
TRINITY_DN471685_c9_g11_i1	HD-ZIP	243	gnl|BL_ORD_ID|82545Dca2137.1 Dianthus caryophyllus|HD-ZIP|HD-ZIP family protein	82545	9.4434e-27	83.0986	106.686	71	59
TRINITY_DN513278_c9_g7_i11	FAR1	705	gnl|BL_ORD_ID|21158EMT21149 Aegilops tauschii|FAR1|FAR1 family protein	21158	1.44806e-22	82.8125	100.138	64	53
TRINITY_DN491806_c4_g6_i11	B3	236	gnl|BL_ORD_ID|264014Sme2.5_14039.1_g00001.1 Solanum melongena|B3|B3 family protein	264014	0.000164595	56.4356	41.9726	101	57
TRINITY_DN485230_c12_g5_i2	ZF-HD	233	gnl|BL_ORD_ID|269698Sopen05g016700.1 Solanum pennellii|ZF-HD|ZF-HD family protein	269698	0.0149897	48.5294	36.1946	68	33
TRINITY_DN500023_c12_g1_i1	ZF-HD	204	gnl|BL_ORD_ID|269698Sopen05g016700.1 Solanum pennellii|ZF-HD|ZF-HD family protein	269698	4.33262e-29	89.3939	113.62	66	59
TRINITY_DN336669_c0_g1_i1	FAR1	295	gnl|BL_ORD_ID|199065LOC_Os04g22990.1 Oryza sativa subsp. japonica|FAR1|FAR1 family protein	199065	5.47246e-11	51.6484	62.3882	91	47
TRINITY_DN411768_c0_g2_i1	NAC	220	gnl|BL_ORD_ID|128048Itr_sc004419.1_g00003.1 Ipomoea trifida|NAC|NAC family protein	128048	8.30475e-08	61.8182	51.9878	55	34
TRINITY_DN196264_c0_g1_i1	MYB	228	gnl|BL_ORD_ID|20187EMT20255 Aegilops tauschii|MYB|MYB family protein	20187	2.61091e-08	58.7302	52.373	63	37
TRINITY_DN290105_c2_g2_i1	NAC	239	gnl|BL_ORD_ID|128048Itr_sc004419.1_g00003.1 Ipomoea trifida|NAC|NAC family protein	128048	1.54393e-10	57.3333	60.4622	75	43
TRINITY_DN348279_c0_g1_i1	M-type_MADS	236	gnl|BL_ORD_ID|198356LOC_Os11g12360.1 Oryza sativa subsp. japonica|M-type_MADS|M-type_MADS family protein	198356	2.84665e-24	76.9231	100.138	78	60
TRINITY_DN391973_c1_g2_i1	FAR1	205	gnl|BL_ORD_ID|199065LOC_Os04g22990.1 Oryza sativa subsp. japonica|FAR1|FAR1 family protein	199065	4.30893e-13	63.0769	67.3958	65	41
TRINITY_DN407165_c1_g3_i1	FAR1	203	gnl|BL_ORD_ID|199065LOC_Os04g22990.1 Oryza sativa subsp. japonica|FAR1|FAR1 family protein	199065	5.02127e-09	57.1429	55.4546	63	36
TRINITY_DN424854_c2_g1_i1	TCP	211	gnl|BL_ORD_ID|270237Sopen12g015990.1 Solanum pennellii|TCP|TCP family protein	270237	1.01462e-31	88.5714	121.324	70	62
TRINITY_DN454181_c11_g1_i1	NF-X1	292	gnl|BL_ORD_ID|160152Mapoly0036s0109.3.p Marchantia polymorpha|NF-X1|NF-X1 family protein	160152	0.0380386	40.6593	35.039	91	37
TRINITY_DN459122_c2_g2_i1	ERF	204	gnl|BL_ORD_ID|20250EMT26591 Aegilops tauschii|ERF|ERF family protein	20250	3.85829e-22	89.3939	88.1965	66	59
TRINITY_DN465484_c17_g6_i2	NAC	292	gnl|BL_ORD_ID|128048Itr_sc004419.1_g00003.1 Ipomoea trifida|NAC|NAC family protein	128048	2.923e-16	61.2245	77.7962	98	60
TRINITY_DN473074_c8_g6_i3	NAC	261	gnl|BL_ORD_ID|128048Itr_sc004419.1_g00003.1 Ipomoea trifida|NAC|NAC family protein	128048	0.000171782	70.8333	42.3578	48	34
TRINITY_DN473628_c3_g2_i4	M-type_MADS	425	gnl|BL_ORD_ID|198356LOC_Os11g12360.1 Oryza sativa subsp. japonica|M-type_MADS|M-type_MADS family protein	198356	2.22639e-21	53.125	94.3597	128	68
TRINITY_DN477185_c12_g3_i1	NAC	219	gnl|BL_ORD_ID|128048Itr_sc004419.1_g00003.1 Ipomoea trifida|NAC|NAC family protein	128048	4.56783e-08	61.9048	52.7582	63	39
TRINITY_DN478367_c9_g2_i1	HB-other	253	gnl|BL_ORD_ID|297245TRIUR3_32002-P1 Triticum urartu|HB-other|HB-other family protein	297245	1.07466e-06	53.7037	46.595	54	29
TRINITY_DN478439_c8_g2_i1	C2H2	419	gnl|BL_ORD_ID|297126TRIUR3_34542-P1 Triticum urartu|C2H2|C2H2 family protein	297126	2.39778e-13	85.0746	69.707	67	57
TRINITY_DN479687_c8_g1_i2	HD-ZIP	268	gnl|BL_ORD_ID|216651PH01000183G0940 Phyllostachys heterocycla|HD-ZIP|HD-ZIP family protein	216651	0.00132028	44.3038	39.6614	79	35
TRINITY_DN489661_c2_g2_i1	ERF	221	gnl|BL_ORD_ID|291652XP_010556248.1 Tarenaya hassleriana|ERF|ERF family protein	291652	3.61682e-25	76.3889	102.064	72	55
TRINITY_DN496849_c0_g1_i1	TCP	225	gnl|BL_ORD_ID|270237Sopen12g015990.1 Solanum pennellii|TCP|TCP family protein	270237	5.20412e-33	85.3333	125.176	75	64
TRINITY_DN509613_c20_g4_i2	FAR1	352	gnl|BL_ORD_ID|199065LOC_Os04g22990.1 Oryza sativa subsp. japonica|FAR1|FAR1 family protein	199065	6.17862e-42	75.4386	152.91	114	86
TRINITY_DN520191_c12_g2_i2	TCP	604	gnl|BL_ORD_ID|270237Sopen12g015990.1 Solanum pennellii|TCP|TCP family protein	270237	1.22505e-61	68.75	213.386	208	143
TRINITY_DN523983_c9_g3_i2	ERF	1280	gnl|BL_ORD_ID|127406Itr_sc000795.1_g00005.1 Ipomoea trifida|ERF|ERF family protein	127406	1.68752e-19	46.4865	94.3597	185	86
TRINITY_DN476935_c0_g3_i6	M-type_MADS	505	gnl|BL_ORD_ID|198356LOC_Os11g12360.1 Oryza sativa subsp. japonica|M-type_MADS|M-type_MADS family protein	198356	3.79806e-78	81.5476	259.225	168	137
TRINITY_DN464861_c5_g8_i1	HD-ZIP	212	gnl|BL_ORD_ID|269681Sopen09g021360.1 Solanum pennellii|HD-ZIP|HD-ZIP family protein	269681	5.13743e-26	82.8571	104.76	70	58
TRINITY_DN523630_c6_g4_i3	NAC	216	gnl|BL_ORD_ID|217511PH01000358G0570 Phyllostachys heterocycla|NAC|NAC family protein	217511	4.30209e-13	80.4878	66.6254	41	33
TRINITY_DN405913_c0_g3_i5	bHLH	240	gnl|BL_ORD_ID|258656676783878 Sisymbrium irio|bHLH|bHLH family protein	258656	0.0385984	64	34.2686	50	32
TRINITY_DN495657_c3_g2_i2	M-type_MADS	711	gnl|BL_ORD_ID|198356LOC_Os11g12360.1 Oryza sativa subsp. japonica|M-type_MADS|M-type_MADS family protein	198356	1.27582e-26	69.1358	113.235	81	56
TRINITY_DN414421_c0_g7_i1	NF-YA	229	gnl|BL_ORD_ID|269338Sopen02g006770.1 Solanum pennellii|NF-YA|NF-YA family protein	269338	1.81419e-16	77.193	77.411	57	44
TRINITY_DN303807_c0_g1_i1	ZF-HD	208	gnl|BL_ORD_ID|269698Sopen05g016700.1 Solanum pennellii|ZF-HD|ZF-HD family protein	269698	2.40064e-30	82.6087	117.472	69	57
TRINITY_DN371617_c1_g1_i1	FAR1	203	gnl|BL_ORD_ID|199065LOC_Os04g22990.1 Oryza sativa subsp. japonica|FAR1|FAR1 family protein	199065	3.68075e-10	55.2239	58.5362	67	37
TRINITY_DN405924_c1_g4_i1	Trihelix	232	gnl|BL_ORD_ID|297027TRIUR3_33328-P1 Triticum urartu|Trihelix|Trihelix family protein	297027	3.09548e-12	62.1622	64.6994	74	46
TRINITY_DN406063_c4_g3_i1	FAR1	240	gnl|BL_ORD_ID|199065LOC_Os04g22990.1 Oryza sativa subsp. japonica|FAR1|FAR1 family protein	199065	3.70314e-11	67.6471	62.003	68	46
TRINITY_DN448491_c9_g2_i1	NAC	240	gnl|BL_ORD_ID|128048Itr_sc004419.1_g00003.1 Ipomoea trifida|NAC|NAC family protein	128048	1.16688e-14	63.6364	72.4034	66	42
TRINITY_DN449294_c9_g2_i3	FAR1	361	gnl|BL_ORD_ID|199065LOC_Os04g22990.1 Oryza sativa subsp. japonica|FAR1|FAR1 family protein	199065	3.25265e-44	77.5	159.458	120	93
TRINITY_DN449540_c0_g3_i1	G2-like	254	gnl|BL_ORD_ID|269967Sopen02g025440.1 Solanum pennellii|G2-like|G2-like family protein	269967	0.000193208	56.8182	41.9726	44	25
TRINITY_DN456287_c3_g5_i1	GATA	350	gnl|BL_ORD_ID|83548KZV47610.1 Dorcoceras hygrometricum|GATA|GATA family protein	83548	0.0391399	44.7368	35.4242	76	34
TRINITY_DN465132_c0_g1_i2	NAC	232	gnl|BL_ORD_ID|128048Itr_sc004419.1_g00003.1 Ipomoea trifida|NAC|NAC family protein	128048	4.35495e-10	59.4203	58.9214	69	41
TRINITY_DN467402_c3_g1_i1	ERF	228	gnl|BL_ORD_ID|20341EMT00652 Aegilops tauschii|ERF|ERF family protein	20341	1.40799e-28	85.5072	104.375	69	59
TRINITY_DN467831_c0_g4_i1	ZF-HD	218	gnl|BL_ORD_ID|269698Sopen05g016700.1 Solanum pennellii|ZF-HD|ZF-HD family protein	269698	0.0187758	55.1724	35.8094	58	32
TRINITY_DN474108_c7_g6_i2	TCP	250	gnl|BL_ORD_ID|270237Sopen12g015990.1 Solanum pennellii|TCP|TCP family protein	270237	1.25685e-05	57.6923	45.8246	52	30
TRINITY_DN478335_c1_g1_i3	TCP	215	gnl|BL_ORD_ID|270237Sopen12g015990.1 Solanum pennellii|TCP|TCP family protein	270237	0.00700867	58.3333	36.965	60	35
TRINITY_DN486801_c5_g3_i2	FAR1	284	gnl|BL_ORD_ID|199065LOC_Os04g22990.1 Oryza sativa subsp. japonica|FAR1|FAR1 family protein	199065	3.73634e-22	64.8936	94.7449	94	61
TRINITY_DN491891_c4_g1_i6	B3	410	gnl|BL_ORD_ID|17011Araip.7E64B Arachis ipaensis|B3|B3 family protein	17011	0.0475365	47.8261	35.8094	69	33
TRINITY_DN503924_c11_g5_i1	FAR1	250	gnl|BL_ORD_ID|199065LOC_Os04g22990.1 Oryza sativa subsp. japonica|FAR1|FAR1 family protein	199065	2.48542e-16	64.1975	77.411	81	52
TRINITY_DN512364_c8_g1_i1	C2H2	232	gnl|BL_ORD_ID|297126TRIUR3_34542-P1 Triticum urartu|C2H2|C2H2 family protein	297126	1.88038e-09	78.9474	56.225	38	30
TRINITY_DN522027_c23_g5_i7	FAR1	384	gnl|BL_ORD_ID|82306Dca20074.1 Dianthus caryophyllus|FAR1|FAR1 family protein	82306	0.0109309	58.5366	37.3502	41	24
TRINITY_DN65568_c1_g1_i1	bHLH	243	gnl|BL_ORD_ID|297244TRIUR3_29035-P1 Triticum urartu|bHLH|bHLH family protein	297244	0.0162981	47.2973	35.8094	74	35
TRINITY_DN500023_c66_g10_i1	ZF-HD	246	gnl|BL_ORD_ID|269698Sopen05g016700.1 Solanum pennellii|ZF-HD|ZF-HD family protein	269698	5.47947e-28	76.8293	111.309	82	63
TRINITY_DN475082_c31_g2_i1	B3	860	gnl|BL_ORD_ID|20166EMT01685 Aegilops tauschii|B3|B3 family protein	20166	4.78207e-32	60.2649	130.183	151	91
TRINITY_DN454879_c0_g2_i1	ZF-HD	225	gnl|BL_ORD_ID|269698Sopen05g016700.1 Solanum pennellii|ZF-HD|ZF-HD family protein	269698	3.75749e-22	78.6667	93.9745	75	59
TRINITY_DN511359_c2_g2_i1	M-type_MADS	400	gnl|BL_ORD_ID|198356LOC_Os11g12360.1 Oryza sativa subsp. japonica|M-type_MADS|M-type_MADS family protein	198356	3.18938e-12	68.3333	67.0106	60	41
TRINITY_DN523914_c34_g1_i1	NAC	286	gnl|BL_ORD_ID|296685TRIUR3_29857-P1 Triticum urartu|NAC|NAC family protein	296685	6.7322e-08	95.2381	52.373	63	60
TRINITY_DN339530_c2_g2_i1	ZF-HD	230	gnl|BL_ORD_ID|269698Sopen05g016700.1 Solanum pennellii|ZF-HD|ZF-HD family protein	269698	9.46654e-06	55	45.8246	60	33
TRINITY_DN412082_c8_g5_i4	NF-YC	308	gnl|BL_ORD_ID|269751Sopen03g030560.1 Solanum pennellii|NF-YC|NF-YC family protein	269751	0.000733344	55.3571	40.4318	56	31
TRINITY_DN385444_c11_g1_i1	B3	328	gnl|BL_ORD_ID|21154EMT05021 Aegilops tauschii|B3|B3 family protein	21154	1.84329e-14	63.7681	71.633	69	44
TRINITY_DN468788_c5_g4_i2	NAC	289	gnl|BL_ORD_ID|128048Itr_sc004419.1_g00003.1 Ipomoea trifida|NAC|NAC family protein	128048	2.55003e-08	53.1646	54.299	79	42
TRINITY_DN330860_c0_g1_i2	MYB	306	gnl|BL_ORD_ID|20187EMT20255 Aegilops tauschii|MYB|MYB family protein	20187	8.18387e-20	63.2184	85.1149	87	55
TRINITY_DN345413_c0_g1_i1	FAR1	201	gnl|BL_ORD_ID|199065LOC_Os04g22990.1 Oryza sativa subsp. japonica|FAR1|FAR1 family protein	199065	7.72998e-10	57.5758	57.7658	66	38
TRINITY_DN425212_c1_g1_i1	MYB	336	gnl|BL_ORD_ID|20187EMT20255 Aegilops tauschii|MYB|MYB family protein	20187	4.77461e-27	76.25	105.916	80	61
TRINITY_DN458526_c7_g1_i1	NAC	204	gnl|BL_ORD_ID|128048Itr_sc004419.1_g00003.1 Ipomoea trifida|NAC|NAC family protein	128048	4.24959e-09	63.2353	55.4546	68	43
TRINITY_DN462334_c0_g1_i1	M-type_MADS	210	gnl|BL_ORD_ID|198356LOC_Os11g12360.1 Oryza sativa subsp. japonica|M-type_MADS|M-type_MADS family protein	198356	5.04917e-30	84.2857	116.316	70	59
TRINITY_DN464219_c2_g1_i3	MYB	274	gnl|BL_ORD_ID|20187EMT20255 Aegilops tauschii|MYB|MYB family protein	20187	1.43862e-11	60.2564	62.3882	78	47
TRINITY_DN474108_c7_g4_i1	TCP	221	gnl|BL_ORD_ID|270237Sopen12g015990.1 Solanum pennellii|TCP|TCP family protein	270237	3.73244e-06	57.4074	46.9802	54	31
TRINITY_DN474846_c7_g4_i1	NAC	209	gnl|BL_ORD_ID|20708EMT33859 Aegilops tauschii|NAC|NAC family protein	20708	7.25669e-06	59.6154	45.8246	52	31
TRINITY_DN475153_c13_g1_i2	B3	206	gnl|BL_ORD_ID|270192Sopen00g003940.1 Solanum pennellii|B3|B3 family protein	270192	0.00113816	52.459	39.2762	61	32
TRINITY_DN475153_c14_g5_i1	B3	374	gnl|BL_ORD_ID|270192Sopen00g003940.1 Solanum pennellii|B3|B3 family protein	270192	6.92987e-05	55.7377	44.2838	61	34
TRINITY_DN481074_c2_g1_i1	MYB	218	gnl|BL_ORD_ID|296368TRIUR3_21241-P1 Triticum urartu|MYB|MYB family protein	296368	1.34189e-21	88.4615	90.1225	52	46
TRINITY_DN488766_c21_g1_i1	bHLH	273	gnl|BL_ORD_ID|296394TRIUR3_31817-P1 Triticum urartu|bHLH|bHLH family protein	296394	7.02457e-20	91.6667	85.1149	48	44
TRINITY_DN494041_c22_g1_i5	GeBP protein	412	gnl|BL_ORD_ID|48387CA07g12470 Capsicum annuum|GeBP|GeBP family protein	48387	0.0193123	56.4516	36.965	62	35
TRINITY_DN496570_c11_g4_i2	ZF-HD	449	gnl|BL_ORD_ID|269698Sopen05g016700.1 Solanum pennellii|ZF-HD|ZF-HD family protein	269698	2.07929e-05	45.6897	46.2098	116	53
TRINITY_DN498376_c10_g2_i3	NAC	368	gnl|BL_ORD_ID|296846TRIUR3_11787-P1 Triticum urartu|NAC|NAC family protein	296846	2.71246e-25	86.3636	102.449	66	57
TRINITY_DN504236_c37_g18_i1	FAR1	330	gnl|BL_ORD_ID|199065LOC_Os04g22990.1 Oryza sativa subsp. japonica|FAR1|FAR1 family protein	199065	2.51296e-10	48.1481	60.8474	108	52
TRINITY_DN513242_c4_g6_i1	HD-ZIP	218	gnl|BL_ORD_ID|269681Sopen09g021360.1 Solanum pennellii|HD-ZIP|HD-ZIP family protein	269681	6.82515e-05	64.1026	43.1282	39	25
TRINITY_DN521381_c7_g4_i2	TCP	230	gnl|BL_ORD_ID|270237Sopen12g015990.1 Solanum pennellii|TCP|TCP family protein	270237	0.00377865	58.6957	37.7354	46	27
TRINITY_DN523624_c7_g6_i7	FAR1	1523	gnl|BL_ORD_ID|199065LOC_Os04g22990.1 Oryza sativa subsp. japonica|FAR1|FAR1 family protein	199065	3.1296e-11	46.6667	69.3218	210	98
TRINITY_DN468866_c1_g2_i1	B3	224	gnl|BL_ORD_ID|20494EMT26093 Aegilops tauschii|B3|B3 family protein	20494	2.507e-17	90.6977	79.7221	43	39
TRINITY_DN523420_c3_g1_i2	M-type_MADS	629	gnl|BL_ORD_ID|198356LOC_Os11g12360.1 Oryza sativa subsp. japonica|M-type_MADS|M-type_MADS family protein	198356	4.80294e-55	69.2737	194.897	179	124
TRINITY_DN484653_c4_g2_i3	HD-ZIP	308	gnl|BL_ORD_ID|269681Sopen09g021360.1 Solanum pennellii|HD-ZIP|HD-ZIP family protein	269681	2.10627e-38	79.4118	142.124	102	81
TRINITY_DN498538_c8_g9_i1	MIKC_MADS	243	gnl|BL_ORD_ID|264243Sme2.5_00844.1_g00009.1 Solanum melongena|MIKC_MADS|MIKC_MADS family protein	264243	5.03041e-15	73.2143	71.633	56	41
TRINITY_DN117348_c0_g3_i2	MYB	247	gnl|BL_ORD_ID|129823Jcr4S05030.40 Jatropha curcas|MYB|MYB family protein	129823	0.00762662	58.5366	31.9574	41	24
TRINITY_DN191089_c0_g1_i1	FAR1	215	gnl|BL_ORD_ID|199065LOC_Os04g22990.1 Oryza sativa subsp. japonica|FAR1|FAR1 family protein	199065	8.81341e-20	73.8462	86.6557	65	48
TRINITY_DN259721_c1_g1_i1	NAC	211	gnl|BL_ORD_ID|296846TRIUR3_11787-P1 Triticum urartu|NAC|NAC family protein	296846	3.30105e-05	69.2308	43.5134	39	27
TRINITY_DN339823_c1_g1_i1	TCP	274	gnl|BL_ORD_ID|270237Sopen12g015990.1 Solanum pennellii|TCP|TCP family protein	270237	4.20971e-40	82.4176	146.362	91	75
TRINITY_DN405583_c3_g3_i1	NAC	238	gnl|BL_ORD_ID|128048Itr_sc004419.1_g00003.1 Ipomoea trifida|NAC|NAC family protein	128048	0.00023986	58.4906	41.5874	53	31
TRINITY_DN448009_c1_g1_i1	B3	209	gnl|BL_ORD_ID|269643Sopen03g007470.1 Solanum pennellii|B3|B3 family protein	269643	2.31822e-09	64.8148	56.225	54	35
TRINITY_DN450240_c0_g1_i1	NAC	247	gnl|BL_ORD_ID|128048Itr_sc004419.1_g00003.1 Ipomoea trifida|NAC|NAC family protein	128048	2.13995e-15	64.9351	74.7146	77	50
TRINITY_DN463106_c0_g2_i1	bHLH	303	gnl|BL_ORD_ID|270596Sopen12g030120.2 Solanum pennellii|bHLH|bHLH family protein	270596	3.15045e-40	89.1089	146.747	101	90
TRINITY_DN463543_c2_g1_i1	ZF-HD	212	gnl|BL_ORD_ID|269698Sopen05g016700.1 Solanum pennellii|ZF-HD|ZF-HD family protein	269698	5.37819e-08	62.3188	52.373	69	43
TRINITY_DN466166_c3_g4_i2	ZF-HD	227	gnl|BL_ORD_ID|269698Sopen05g016700.1 Solanum pennellii|ZF-HD|ZF-HD family protein	269698	4.66419e-31	86.4865	119.783	74	64
TRINITY_DN470455_c14_g8_i1	FAR1	204	gnl|BL_ORD_ID|199065LOC_Os04g22990.1 Oryza sativa subsp. japonica|FAR1|FAR1 family protein	199065	1.71094e-10	57.5758	59.6918	66	38
TRINITY_DN472271_c3_g1_i1	FAR1	243	gnl|BL_ORD_ID|82637Dca43462.1 Dianthus caryophyllus|FAR1|FAR1 family protein	82637	5.8262e-07	67.6471	41.9726	34	23
TRINITY_DN475524_c11_g3_i1	NAC	242	gnl|BL_ORD_ID|128048Itr_sc004419.1_g00003.1 Ipomoea trifida|NAC|NAC family protein	128048	4.65993e-09	57.5342	55.8398	73	42
TRINITY_DN477924_c49_g6_i1	NAC	249	gnl|BL_ORD_ID|128048Itr_sc004419.1_g00003.1 Ipomoea trifida|NAC|NAC family protein	128048	4.34525e-16	62.5	76.6406	80	50
TRINITY_DN517606_c3_g8_i1	GRAS	267	gnl|BL_ORD_ID|209151PDK_30s711191g007 Phoenix dactylifera|GRAS|GRAS family protein	209151	0.0465509	59.4595	34.6538	37	22
TRINITY_DN523340_c0_g4_i1	NF-YC	3099	gnl|BL_ORD_ID|263499Sme2.5_17281.1_g00001.1 Solanum melongena|NF-YC|NF-YC family protein	263499	7.75325e-18	62.2222	92.0485	135	84
TRINITY_DN523447_c31_g8_i1	ERF	407	gnl|BL_ORD_ID|270781Sopen11g017580.1 Solanum pennellii|ERF|ERF family protein	270781	1.33134e-17	55.4545	83.1889	110	61
TRINITY_DN464224_c2_g5_i1	TALE	211	gnl|BL_ORD_ID|21193EMT16587 Aegilops tauschii|TALE|TALE family protein	21193	6.76669e-09	71.7391	54.6842	46	33
TRINITY_DN523946_c19_g5_i5	FAR1	610	gnl|BL_ORD_ID|81473Dca46628.1 Dianthus caryophyllus|FAR1|FAR1 family protein	81473	1.05139e-29	66.4286	116.316	140	93
TRINITY_DN498538_c8_g3_i1	TCP	493	gnl|BL_ORD_ID|269425Sopen05g005700.1 Solanum pennellii|TCP|TCP family protein	269425	3.95955e-45	67.6829	163.696	164	111
TRINITY_DN424338_c1_g1_i1	MYB	206	gnl|BL_ORD_ID|20187EMT20255 Aegilops tauschii|MYB|MYB family protein	20187	4.73009e-14	87.1795	68.1662	39	34
TRINITY_DN406731_c2_g2_i1	NAC	220	gnl|BL_ORD_ID|296846TRIUR3_11787-P1 Triticum urartu|NAC|NAC family protein	296846	3.55037e-12	72	63.929	50	36
TRINITY_DN496245_c21_g2_i2	NAC	411	gnl|BL_ORD_ID|128048Itr_sc004419.1_g00003.1 Ipomoea trifida|NAC|NAC family protein	128048	5.31951e-24	60.9756	102.064	123	75
TRINITY_DN474565_c13_g11_i1	B3	235	gnl|BL_ORD_ID|21154EMT05021 Aegilops tauschii|B3|B3 family protein	21154	1.86904e-19	88.0952	84.3445	42	37
TRINITY_DN498129_c2_g11_i1	ZF-HD	285	gnl|BL_ORD_ID|269698Sopen05g016700.1 Solanum pennellii|ZF-HD|ZF-HD family protein	269698	2.43321e-31	77.6596	121.324	94	73
TRINITY_DN488419_c1_g1_i1	ERF	206	gnl|BL_ORD_ID|291652XP_010556248.1 Tarenaya hassleriana|ERF|ERF family protein	291652	8.64356e-18	75	80.8777	68	51
TRINITY_DN522088_c118_g1_i4	FAR1	1955	gnl|BL_ORD_ID|199065LOC_Os04g22990.1 Oryza sativa subsp. japonica|FAR1|FAR1 family protein	199065	4.8231e-15	51.7647	82.4185	170	88
TRINITY_DN253483_c2_g2_i1	ZF-HD	266	gnl|BL_ORD_ID|269698Sopen05g016700.1 Solanum pennellii|ZF-HD|ZF-HD family protein	269698	5.75124e-15	73.3333	73.559	60	44
TRINITY_DN513242_c4_g1_i7	TCP	335	gnl|BL_ORD_ID|270237Sopen12g015990.1 Solanum pennellii|TCP|TCP family protein	270237	9.23629e-11	53.7879	62.003	132	71
TRINITY_DN75400_c0_g1_i1	ERF	243	gnl|BL_ORD_ID|270781Sopen11g017580.1 Solanum pennellii|ERF|ERF family protein	270781	5.41663e-12	64.6154	64.6994	65	42
TRINITY_DN326044_c0_g1_i1	TCP	218	gnl|BL_ORD_ID|270237Sopen12g015990.1 Solanum pennellii|TCP|TCP family protein	270237	1.46679e-31	90.2778	120.939	72	65
TRINITY_DN339269_c1_g1_i1	FAR1	232	gnl|BL_ORD_ID|199065LOC_Os04g22990.1 Oryza sativa subsp. japonica|FAR1|FAR1 family protein	199065	0.00413432	50.7246	37.7354	69	35
TRINITY_DN389321_c1_g2_i1	NAC	288	gnl|BL_ORD_ID|128048Itr_sc004419.1_g00003.1 Ipomoea trifida|NAC|NAC family protein	128048	1.06459e-12	57.7778	67.3958	90	52
TRINITY_DN389986_c0_g2_i1	Trihelix	210	gnl|BL_ORD_ID|297027TRIUR3_33328-P1 Triticum urartu|Trihelix|Trihelix family protein	297027	1.22462e-13	86.1111	68.5514	36	31
TRINITY_DN406063_c4_g1_i4	FAR1	233	gnl|BL_ORD_ID|199065LOC_Os04g22990.1 Oryza sativa subsp. japonica|FAR1|FAR1 family protein	199065	1.78917e-13	68.8312	68.9366	77	53
TRINITY_DN445411_c6_g2_i1	G2-like	221	gnl|BL_ORD_ID|296938TRIUR3_23402-P1 Triticum urartu|G2-like|G2-like family protein	296938	0.0328582	60.4651	34.6538	43	26
TRINITY_DN448278_c7_g1_i1	FAR1	208	gnl|BL_ORD_ID|199065LOC_Os04g22990.1 Oryza sativa subsp. japonica|FAR1|FAR1 family protein	199065	7.65492e-11	59.7015	60.8474	67	40
TRINITY_DN467958_c9_g6_i4	FAR1	315	gnl|BL_ORD_ID|199065LOC_Os04g22990.1 Oryza sativa subsp. japonica|FAR1|FAR1 family protein	199065	6.30096e-10	51.2821	59.3066	78	40
TRINITY_DN477185_c12_g2_i1	ZF-HD	209	gnl|BL_ORD_ID|269698Sopen05g016700.1 Solanum pennellii|ZF-HD|ZF-HD family protein	269698	3.78167e-09	65.4545	55.8398	55	36
TRINITY_DN481603_c1_g3_i1	FAR1	236	gnl|BL_ORD_ID|199065LOC_Os04g22990.1 Oryza sativa subsp. japonica|FAR1|FAR1 family protein	199065	3.53631e-12	58.7302	65.0846	63	37
TRINITY_DN484890_c12_g2_i1	B3	208	gnl|BL_ORD_ID|20166EMT01685 Aegilops tauschii|B3|B3 family protein	20166	2.46584e-17	72.4138	79.337	58	42
TRINITY_DN487303_c3_g3_i1	NAC	220	gnl|BL_ORD_ID|296846TRIUR3_11787-P1 Triticum urartu|NAC|NAC family protein	296846	7.72888e-12	69.3878	63.1586	49	34
TRINITY_DN487532_c10_g5_i1	FAR1	217	gnl|BL_ORD_ID|199065LOC_Os04g22990.1 Oryza sativa subsp. japonica|FAR1|FAR1 family protein	199065	7.85889e-21	70.8333	89.7373	72	51
TRINITY_DN521880_c7_g2_i1	C3H	207	gnl|BL_ORD_ID|171871XP_016440619.1 Nicotiana tabacum|C3H|C3H family protein	171871	7.14581e-11	64.8148	60.4622	54	35
TRINITY_DN504322_c9_g5_i3	FAR1	503	gnl|BL_ORD_ID|199065LOC_Os04g22990.1 Oryza sativa subsp. japonica|FAR1|FAR1 family protein	199065	9.79955e-19	63.6364	87.4261	99	63
TRINITY_DN459083_c1_g6_i1	G2-like	219	gnl|BL_ORD_ID|269678Sopen11g010100.1 Solanum pennellii|G2-like|G2-like family protein	269678	3.92863e-05	51.3889	43.8986	72	37
TRINITY_DN523813_c72_g2_i3	NAC	292	gnl|BL_ORD_ID|128048Itr_sc004419.1_g00003.1 Ipomoea trifida|NAC|NAC family protein	128048	2.95776e-14	59.375	72.0182	96	57
TRINITY_DN508130_c2_g1_i1	TCP	418	gnl|BL_ORD_ID|270237Sopen12g015990.1 Solanum pennellii|TCP|TCP family protein	270237	0.00115142	37.5796	40.817	157	59
TRINITY_DN461287_c1_g1_i1	FAR1	216	gnl|BL_ORD_ID|199065LOC_Os04g22990.1 Oryza sativa subsp. japonica|FAR1|FAR1 family protein	199065	4.00587e-27	77.4648	107.842	71	55
TRINITY_DN519560_c41_g1_i3	HD-ZIP	270	gnl|BL_ORD_ID|269681Sopen09g021360.1 Solanum pennellii|HD-ZIP|HD-ZIP family protein	269681	0.000126364	63.1579	42.743	38	24
TRINITY_DN316862_c3_g1_i1	FAR1	235	gnl|BL_ORD_ID|199065LOC_Os04g22990.1 Oryza sativa subsp. japonica|FAR1|FAR1 family protein	199065	6.49853e-09	52.6316	55.4546	76	40
TRINITY_DN356538_c10_g1_i1	bZIP	204	gnl|BL_ORD_ID|296500TRIUR3_08598-P1 Triticum urartu|bZIP|bZIP family protein	296500	0.000273169	62.1622	40.817	37	23
TRINITY_DN386162_c0_g3_i1	FAR1	204	gnl|BL_ORD_ID|199065LOC_Os04g22990.1 Oryza sativa subsp. japonica|FAR1|FAR1 family protein	199065	1.08513e-17	68.6567	80.4925	67	46
TRINITY_DN464880_c10_g8_i1	NAC	241	gnl|BL_ORD_ID|296846TRIUR3_11787-P1 Triticum urartu|NAC|NAC family protein	296846	4.10585e-06	61.3636	46.595	44	27
TRINITY_DN467958_c9_g3_i2	FAR1	247	gnl|BL_ORD_ID|199065LOC_Os04g22990.1 Oryza sativa subsp. japonica|FAR1|FAR1 family protein	199065	4.0288e-13	57.1429	68.1662	77	44
TRINITY_DN471068_c1_g1_i2	C3H	582	gnl|BL_ORD_ID|296282TRIUR3_29037-P1 Triticum urartu|C3H|C3H family protein	296282	0.0396943	64.7059	37.3502	34	22
TRINITY_DN473014_c12_g3_i1	FAR1	220	gnl|BL_ORD_ID|199065LOC_Os04g22990.1 Oryza sativa subsp. japonica|FAR1|FAR1 family protein	199065	2.03422e-32	81.9444	123.25	72	59
TRINITY_DN479249_c1_g1_i2	FAR1	235	gnl|BL_ORD_ID|199065LOC_Os04g22990.1 Oryza sativa subsp. japonica|FAR1|FAR1 family protein	199065	8.40976e-20	71.7949	87.0409	78	56
TRINITY_DN480001_c2_g8_i1	NAC	230	gnl|BL_ORD_ID|296846TRIUR3_11787-P1 Triticum urartu|NAC|NAC family protein	296846	8.54522e-05	61.9048	42.743	42	26
TRINITY_DN491144_c8_g8_i3	NAC	259	gnl|BL_ORD_ID|128048Itr_sc004419.1_g00003.1 Ipomoea trifida|NAC|NAC family protein	128048	0.000389411	67.4419	41.2022	43	29
TRINITY_DN499958_c10_g1_i2	B3	248	gnl|BL_ORD_ID|269643Sopen03g007470.1 Solanum pennellii|B3|B3 family protein	269643	5.90658e-09	50	55.4546	64	32
TRINITY_DN503024_c6_g4_i1	B3	244	gnl|BL_ORD_ID|20556EMT22877 Aegilops tauschii|B3|B3 family protein	20556	1.86776e-17	70.7692	77.0258	65	46
TRINITY_DN515549_c18_g6_i1	WRKY	239	gnl|BL_ORD_ID|297335TRIUR3_28409-P1 Triticum urartu|WRKY|WRKY family protein	297335	6.08905e-05	61.5385	43.1282	39	24
TRINITY_DN517362_c27_g5_i1	NAC	247	gnl|BL_ORD_ID|296846TRIUR3_11787-P1 Triticum urartu|NAC|NAC family protein	296846	1.01483e-09	60.3448	57.3806	58	35
TRINITY_DN360816_c7_g1_i3	GATA	264	gnl|BL_ORD_ID|296559TRIUR3_22272-P1 Triticum urartu|GATA|GATA family protein	296559	1.58864e-14	80.4878	71.2478	41	33
TRINITY_DN471685_c11_g1_i1	HD-ZIP	204	gnl|BL_ORD_ID|82545Dca2137.1 Dianthus caryophyllus|HD-ZIP|HD-ZIP family protein	82545	3.49096e-08	67.3077	52.7582	52	35
TRINITY_DN479847_c5_g1_i3	TCP	226	gnl|BL_ORD_ID|269425Sopen05g005700.1 Solanum pennellii|TCP|TCP family protein	269425	1.05994e-12	62.6667	66.2402	75	47
TRINITY_DN453475_c1_g4_i1	ERF	248	gnl|BL_ORD_ID|291652XP_010556248.1 Tarenaya hassleriana|ERF|ERF family protein	291652	2.82283e-26	75.6098	105.916	82	62
TRINITY_DN455931_c7_g5_i1	FAR1	201	gnl|BL_ORD_ID|21158EMT21149 Aegilops tauschii|FAR1|FAR1 family protein	21158	4.59089e-15	90	72.4034	40	36
TRINITY_DN474894_c5_g4_i1	MYB	261	gnl|BL_ORD_ID|20187EMT20255 Aegilops tauschii|MYB|MYB family protein	20187	2.07319e-15	80.4348	72.7886	46	37
TRINITY_DN409693_c2_g6_i3	HD-ZIP	270	gnl|BL_ORD_ID|74564PK16243.1 Cannabis sativa|HD-ZIP|HD-ZIP family protein	74564	0.0466347	47.561	34.6538	82	39
TRINITY_DN498538_c8_g17_i2	LBD	274	gnl|BL_ORD_ID|250519Rsa1.0_02878.1_g00005.1 Raphanus sativus|LBD|LBD family protein	250519	1.58554e-16	73.5294	78.1814	68	50
TRINITY_DN321897_c0_g1_i1	ZF-HD	216	gnl|BL_ORD_ID|269698Sopen05g016700.1 Solanum pennellii|ZF-HD|ZF-HD family protein	269698	4.2548e-25	79.4118	102.449	68	54
TRINITY_DN490843_c13_g2_i1	FAR1	218	gnl|BL_ORD_ID|199065LOC_Os04g22990.1 Oryza sativa subsp. japonica|FAR1|FAR1 family protein	199065	6.07279e-18	61.6279	81.6481	86	53
TRINITY_DN368343_c1_g1_i1	FAR1	202	gnl|BL_ORD_ID|199065LOC_Os04g22990.1 Oryza sativa subsp. japonica|FAR1|FAR1 family protein	199065	1.50935e-18	69.697	83.1889	66	46
TRINITY_DN378405_c1_g2_i1	bHLH	248	gnl|BL_ORD_ID|297244TRIUR3_29035-P1 Triticum urartu|bHLH|bHLH family protein	297244	0.0389402	77.7778	34.6538	36	28
TRINITY_DN446409_c4_g3_i1	FAR1	211	gnl|BL_ORD_ID|82637Dca43462.1 Dianthus caryophyllus|FAR1|FAR1 family protein	82637	2.84894e-07	55.7143	50.0618	70	39
TRINITY_DN458424_c4_g1_i2	NAC	264	gnl|BL_ORD_ID|296846TRIUR3_11787-P1 Triticum urartu|NAC|NAC family protein	296846	3.63132e-12	78.5714	64.3142	42	33
TRINITY_DN466904_c3_g4_i1	NAC	206	gnl|BL_ORD_ID|296846TRIUR3_11787-P1 Triticum urartu|NAC|NAC family protein	296846	0.000406588	64.1026	40.4318	39	25
TRINITY_DN467593_c61_g16_i1	FAR1	291	gnl|BL_ORD_ID|199065LOC_Os04g22990.1 Oryza sativa subsp. japonica|FAR1|FAR1 family protein	199065	4.12324e-36	78.125	135.191	96	75
TRINITY_DN470455_c14_g8_i2	FAR1	280	gnl|BL_ORD_ID|199065LOC_Os04g22990.1 Oryza sativa subsp. japonica|FAR1|FAR1 family protein	199065	9.20664e-14	53.8462	70.4774	91	49
TRINITY_DN473998_c7_g2_i8	C3H	235	gnl|BL_ORD_ID|171871XP_016440619.1 Nicotiana tabacum|C3H|C3H family protein	171871	1.01628e-07	70.2128	51.6026	47	33
TRINITY_DN478193_c13_g2_i6	HD-ZIP	346	gnl|BL_ORD_ID|216651PH01000183G0940 Phyllostachys heterocycla|HD-ZIP|HD-ZIP family protein	216651	0.0235338	41.8605	36.1946	86	36
TRINITY_DN495192_c1_g7_i1	HD-ZIP	235	gnl|BL_ORD_ID|269681Sopen09g021360.1 Solanum pennellii|HD-ZIP|HD-ZIP family protein	269681	8.35774e-30	81.8182	115.931	77	63
TRINITY_DN496930_c9_g5_i1	FAR1	212	gnl|BL_ORD_ID|199065LOC_Os04g22990.1 Oryza sativa subsp. japonica|FAR1|FAR1 family protein	199065	6.6373e-18	71.0145	81.2629	69	49
TRINITY_DN497306_c1_g1_i1	TCP	299	gnl|BL_ORD_ID|270237Sopen12g015990.1 Solanum pennellii|TCP|TCP family protein	270237	2.28344e-39	89.0244	144.821	82	73
TRINITY_DN497720_c17_g1_i1	B3	289	gnl|BL_ORD_ID|57550C.cajan_10775 Cajanus cajan|B3|B3 family protein	57550	6.94963e-05	42.8571	42.743	63	27
TRINITY_DN513242_c5_g1_i3	TCP	275	gnl|BL_ORD_ID|270237Sopen12g015990.1 Solanum pennellii|TCP|TCP family protein	270237	1.73388e-07	57.1429	51.6026	84	48
TRINITY_DN519847_c4_g7_i2	FAR1	209	gnl|BL_ORD_ID|3996Achn314811 Actinidia chinensis|FAR1|FAR1 family protein	3996	0.0172997	48.9796	35.4242	49	24
TRINITY_DN480768_c4_g2_i1	TCP	207	gnl|BL_ORD_ID|270237Sopen12g015990.1 Solanum pennellii|TCP|TCP family protein	270237	4.22949e-05	60.8696	43.5134	46	28
TRINITY_DN468710_c13_g12_i2	GRAS	230	gnl|BL_ORD_ID|297067TRIUR3_03541-P1 Triticum urartu|GRAS|GRAS family protein	297067	1.09531e-08	76.7442	53.9138	43	33
TRINITY_DN492672_c3_g8_i4	M-type_MADS	342	gnl|BL_ORD_ID|198356LOC_Os11g12360.1 Oryza sativa subsp. japonica|M-type_MADS|M-type_MADS family protein	198356	2.07049e-27	69.3694	110.923	111	77
TRINITY_DN409693_c2_g2_i2	C2H2	244	gnl|BL_ORD_ID|297126TRIUR3_34542-P1 Triticum urartu|C2H2|C2H2 family protein	297126	0.000183521	70.7317	41.5874	41	29
TRINITY_DN467610_c3_g8_i1	ZF-HD	267	gnl|BL_ORD_ID|171728XP_016501975.1 Nicotiana tabacum|ZF-HD|ZF-HD family protein	171728	0.0413072	47.0588	34.6538	51	24
TRINITY_DN477688_c10_g12_i2	TCP	228	gnl|BL_ORD_ID|269425Sopen05g005700.1 Solanum pennellii|TCP|TCP family protein	269425	0.00146796	52.0548	39.2762	73	38
TRINITY_DN500066_c8_g2_i2	TALE	257	gnl|BL_ORD_ID|222881XP_008226055.1 Prunus mume|TALE|TALE family protein	222881	0.0215768	60	35.4242	40	24
TRINITY_DN384226_c1_g1_i1	bHLH	350	gnl|BL_ORD_ID|296394TRIUR3_31817-P1 Triticum urartu|bHLH|bHLH family protein	296394	1.57064e-21	93.75	90.5077	48	45
TRINITY_DN487669_c4_g7_i3	TCP	397	gnl|BL_ORD_ID|270237Sopen12g015990.1 Solanum pennellii|TCP|TCP family protein	270237	3.39804e-47	74.0458	168.703	131	97
TRINITY_DN363017_c2_g1_i1	NAC	256	gnl|BL_ORD_ID|128048Itr_sc004419.1_g00003.1 Ipomoea trifida|NAC|NAC family protein	128048	9.18065e-10	57.6471	58.151	85	49
TRINITY_DN382674_c4_g2_i2	ZF-HD	249	gnl|BL_ORD_ID|269698Sopen05g016700.1 Solanum pennellii|ZF-HD|ZF-HD family protein	269698	8.3647e-07	71.1538	49.2914	52	37
TRINITY_DN401408_c0_g1_i1	NAC	221	gnl|BL_ORD_ID|128048Itr_sc004419.1_g00003.1 Ipomoea trifida|NAC|NAC family protein	128048	0.00033541	52.7778	41.2022	72	38
TRINITY_DN425532_c0_g3_i1	ERF	270	gnl|BL_ORD_ID|291652XP_010556248.1 Tarenaya hassleriana|ERF|ERF family protein	291652	2.72418e-30	75.5814	117.857	86	65
TRINITY_DN425532_c0_g8_i8	ERF	222	gnl|BL_ORD_ID|291652XP_010556248.1 Tarenaya hassleriana|ERF|ERF family protein	291652	2.3202e-25	74.3243	102.834	74	55
TRINITY_DN444368_c2_g3_i3	NAC	275	gnl|BL_ORD_ID|128048Itr_sc004419.1_g00003.1 Ipomoea trifida|NAC|NAC family protein	128048	6.30257e-15	60.6742	73.559	89	54
TRINITY_DN460617_c7_g5_i2	FAR1	241	gnl|BL_ORD_ID|199065LOC_Os04g22990.1 Oryza sativa subsp. japonica|FAR1|FAR1 family protein	199065	3.38372e-21	68.75	91.2781	80	55
TRINITY_DN462834_c16_g7_i4	FAR1	304	gnl|BL_ORD_ID|199065LOC_Os04g22990.1 Oryza sativa subsp. japonica|FAR1|FAR1 family protein	199065	2.25436e-27	70.6522	110.153	92	65
TRINITY_DN472585_c5_g2_i1	M-type_MADS	247	gnl|BL_ORD_ID|198356LOC_Os11g12360.1 Oryza sativa subsp. japonica|M-type_MADS|M-type_MADS family protein	198356	1.94526e-19	72.1519	86.2705	79	57
TRINITY_DN477437_c7_g4_i2	NAC	286	gnl|BL_ORD_ID|128048Itr_sc004419.1_g00003.1 Ipomoea trifida|NAC|NAC family protein	128048	1.02106e-06	56.338	49.2914	71	40
TRINITY_DN478272_c25_g3_i3	FAR1	332	gnl|BL_ORD_ID|199065LOC_Os04g22990.1 Oryza sativa subsp. japonica|FAR1|FAR1 family protein	199065	0.000149898	52.6316	43.1282	76	40
TRINITY_DN479786_c11_g4_i1	ZF-HD	208	gnl|BL_ORD_ID|269698Sopen05g016700.1 Solanum pennellii|ZF-HD|ZF-HD family protein	269698	1.02148e-07	62.5	51.6026	64	40
TRINITY_DN48672_c0_g1_i1	MYB	273	gnl|BL_ORD_ID|13191AHYPO_001079-RA Amaranthus hypochondriacus|MYB_related|MYB_related family protein	13191	0.0385472	54.8387	34.6538	62	34
TRINITY_DN489585_c6_g1_i1	GRF	273	gnl|BL_ORD_ID|118630Gorai.013G184200.2 Gossypium raimondii|GRF|GRF family protein	118630	0.0382272	47.1698	34.6538	53	25
TRINITY_DN494860_c10_g8_i1	B3	219	gnl|BL_ORD_ID|269643Sopen03g007470.1 Solanum pennellii|B3|B3 family protein	269643	1.47235e-09	53.125	56.9954	64	34
TRINITY_DN502385_c35_g9_i1	FAR1	611	gnl|BL_ORD_ID|199065LOC_Os04g22990.1 Oryza sativa subsp. japonica|FAR1|FAR1 family protein	199065	2.20334e-44	60.396	163.696	202	122
TRINITY_DN502392_c14_g13_i1	B3	244	gnl|BL_ORD_ID|217202PH01000469G0440 Phyllostachys heterocycla|B3|B3 family protein	217202	0.0101698	59.4595	36.1946	37	22
TRINITY_DN503572_c1_g1_i3	M-type_MADS	267	gnl|BL_ORD_ID|198356LOC_Os11g12360.1 Oryza sativa subsp. japonica|M-type_MADS|M-type_MADS family protein	198356	1.8092e-26	77.2727	107.071	88	68
TRINITY_DN505194_c18_g6_i2	FAR1	562	gnl|BL_ORD_ID|199065LOC_Os04g22990.1 Oryza sativa subsp. japonica|FAR1|FAR1 family protein	199065	1.36772e-14	53.0303	75.485	132	70
TRINITY_DN508250_c3_g4_i1	MYB	209	gnl|BL_ORD_ID|83574KZV44417.1 Dorcoceras hygrometricum|MYB_related|MYB_related family protein	83574	0.0163883	39.2157	35.4242	51	20
TRINITY_DN523472_c18_g5_i2	HD-ZIP	249	gnl|BL_ORD_ID|216651PH01000183G0940 Phyllostachys heterocycla|HD-ZIP|HD-ZIP family protein	216651	7.77099e-06	49.3671	46.2098	79	39
TRINITY_DN523813_c73_g4_i3	NAC	255	gnl|BL_ORD_ID|128048Itr_sc004419.1_g00003.1 Ipomoea trifida|NAC|NAC family protein	128048	3.9358e-16	65.7534	77.0258	73	48
TRINITY_DN523883_c15_g4_i1	HD-ZIP	209	gnl|BL_ORD_ID|269681Sopen09g021360.1 Solanum pennellii|HD-ZIP|HD-ZIP family protein	269681	3.58645e-22	71.0145	93.5893	69	49
TRINITY_DN523817_c15_g5_i5	MYB	318	gnl|BL_ORD_ID|167537NNU_012420-RA Nelumbo nucifera|MYB|MYB family protein	167537	0.0173317	54.1667	36.5798	72	39
TRINITY_DN458062_c0_g1_i1	B3	1366	gnl|BL_ORD_ID|152880MDP0000252727 Malus domestica|B3|B3 family protein	152880	9.20334e-36	47.25	144.436	400	189
TRINITY_DN434946_c1_g6_i8	bHLH	373	gnl|BL_ORD_ID|20362EMT03170 Aegilops tauschii|bHLH|bHLH family protein	20362	0.0450336	53.4884	35.4242	43	23
TRINITY_DN498538_c8_g13_i2	G2-like	232	gnl|BL_ORD_ID|97663FANhyb_rscf00000398.1.g00005.1 Fragaria x ananassa|G2-like|G2-like family protein	97663	2.66662e-15	62.1622	73.559	74	46
TRINITY_DN513242_c4_g1_i4	TCP	337	gnl|BL_ORD_ID|270237Sopen12g015990.1 Solanum pennellii|TCP|TCP family protein	270237	5.90074e-11	53.7879	62.7734	132	71
TRINITY_DN498538_c8_g13_i1	ERF	266	gnl|BL_ORD_ID|270781Sopen11g017580.1 Solanum pennellii|ERF|ERF family protein	270781	1.10882e-19	66.6667	87.0409	87	58
TRINITY_DN523963_c4_g6_i2	C3H	4741	gnl|BL_ORD_ID|195748BGIOSGA023566-PA Oryza sativa subsp. indica|C3H|C3H family protein	195748	5.86971e-47	44.1818	188.348	550	243
TRINITY_DN424957_c1_g1_i1	G2-like	230	gnl|BL_ORD_ID|269678Sopen11g010100.1 Solanum pennellii|G2-like|G2-like family protein	269678	0.000273124	45.9459	41.2022	74	34
TRINITY_DN475524_c11_g2_i2	NAC	308	gnl|BL_ORD_ID|128048Itr_sc004419.1_g00003.1 Ipomoea trifida|NAC|NAC family protein	128048	9.62998e-15	56.8627	73.559	102	58
TRINITY_DN476206_c7_g6_i1	NAC	243	gnl|BL_ORD_ID|128048Itr_sc004419.1_g00003.1 Ipomoea trifida|NAC|NAC family protein	128048	1.54043e-18	65	83.5741	80	52
TRINITY_DN488918_c6_g4_i5	C2H2	280	gnl|BL_ORD_ID|297126TRIUR3_34542-P1 Triticum urartu|C2H2|C2H2 family protein	297126	2.43167e-18	81.6901	82.0333	71	58
TRINITY_DN291911_c0_g1_i1	NAC	205	gnl|BL_ORD_ID|128048Itr_sc004419.1_g00003.1 Ipomoea trifida|NAC|NAC family protein	128048	3.49469e-20	73.1343	87.8113	67	49
TRINITY_DN306968_c0_g1_i1	ERF	217	gnl|BL_ORD_ID|291652XP_010556248.1 Tarenaya hassleriana|ERF|ERF family protein	291652	7.90513e-14	75.4098	69.3218	61	46
TRINITY_DN340809_c0_g1_i2	FAR1	240	gnl|BL_ORD_ID|199065LOC_Os04g22990.1 Oryza sativa subsp. japonica|FAR1|FAR1 family protein	199065	2.10848e-34	82.0513	129.413	78	64
TRINITY_DN405924_c1_g3_i3	Trihelix	298	gnl|BL_ORD_ID|297027TRIUR3_33328-P1 Triticum urartu|Trihelix|Trihelix family protein	297027	1.24614e-23	68.0851	98.5969	94	64
TRINITY_DN446321_c1_g6_i3	TCP	227	gnl|BL_ORD_ID|270237Sopen12g015990.1 Solanum pennellii|TCP|TCP family protein	270237	8.5817e-32	82.4324	121.709	74	61
TRINITY_DN452505_c0_g1_i1	NAC	209	gnl|BL_ORD_ID|296846TRIUR3_11787-P1 Triticum urartu|NAC|NAC family protein	296846	6.83342e-08	73.6842	51.6026	38	28
TRINITY_DN460630_c11_g3_i3	TCP	222	gnl|BL_ORD_ID|270237Sopen12g015990.1 Solanum pennellii|TCP|TCP family protein	270237	7.03748e-18	65.7143	81.6481	70	46
TRINITY_DN463395_c7_g3_i3	NAC	205	gnl|BL_ORD_ID|128048Itr_sc004419.1_g00003.1 Ipomoea trifida|NAC|NAC family protein	128048	1.86377e-08	62.1212	53.9138	66	41
TRINITY_DN464711_c26_g11_i1	C2H2	268	gnl|BL_ORD_ID|297126TRIUR3_34542-P1 Triticum urartu|C2H2|C2H2 family protein	297126	0.000433199	76.3158	40.817	38	29
TRINITY_DN476529_c8_g2_i1	B3	230	gnl|BL_ORD_ID|20166EMT01685 Aegilops tauschii|B3|B3 family protein	20166	7.00733e-06	50.6173	46.2098	81	41
TRINITY_DN476529_c8_g3_i1	B3	262	gnl|BL_ORD_ID|20166EMT01685 Aegilops tauschii|B3|B3 family protein	20166	5.39754e-05	40.404	43.8986	99	40
TRINITY_DN476577_c1_g11_i4	M-type_MADS	206	gnl|BL_ORD_ID|198356LOC_Os11g12360.1 Oryza sativa subsp. japonica|M-type_MADS|M-type_MADS family protein	198356	6.86292e-31	85.2941	118.627	68	58
TRINITY_DN479154_c11_g4_i1	NAC	268	gnl|BL_ORD_ID|128048Itr_sc004419.1_g00003.1 Ipomoea trifida|NAC|NAC family protein	128048	0.00041492	79.4872	41.2022	39	31
TRINITY_DN484653_c4_g6_i1	ERF	240	gnl|BL_ORD_ID|291652XP_010556248.1 Tarenaya hassleriana|ERF|ERF family protein	291652	3.29693e-28	78.481	111.309	79	62
TRINITY_DN493458_c8_g3_i1	FAR1	203	gnl|BL_ORD_ID|199065LOC_Os04g22990.1 Oryza sativa subsp. japonica|FAR1|FAR1 family protein	199065	1.12178e-21	74.6269	92.0485	67	50
TRINITY_DN504236_c37_g3_i1	FAR1	309	gnl|BL_ORD_ID|199065LOC_Os04g22990.1 Oryza sativa subsp. japonica|FAR1|FAR1 family protein	199065	7.00522e-11	46	62.003	100	46
TRINITY_DN519360_c21_g3_i2	M-type_MADS	317	gnl|BL_ORD_ID|198356LOC_Os11g12360.1 Oryza sativa subsp. japonica|M-type_MADS|M-type_MADS family protein	198356	2.32809e-24	60.3774	101.679	106	64
TRINITY_DN478161_c0_g4_i1	YABBY	226	gnl|BL_ORD_ID|258264676791140 Sisymbrium irio|YABBY|YABBY family protein	258264	2.29736e-28	78.6667	110.153	75	59
TRINITY_DN514848_c51_g1_i3	NAC	279	gnl|BL_ORD_ID|296846TRIUR3_11787-P1 Triticum urartu|NAC|NAC family protein	296846	1.31312e-10	83.3333	60.077	36	30
TRINITY_DN523746_c143_g7_i5	MYB	357	gnl|BL_ORD_ID|20187EMT20255 Aegilops tauschii|MYB|MYB family protein	20187	2.66479e-07	78.3784	50.8322	37	29
TRINITY_DN255832_c0_g1_i1	NF-YC	207	gnl|BL_ORD_ID|263429Sme2.5_01876.1_g00001.1 Solanum melongena|NF-YC|NF-YC family protein	263429	2.16916e-16	69.1176	76.2554	68	47
TRINITY_DN305237_c0_g1_i1	M-type_MADS	211	gnl|BL_ORD_ID|198356LOC_Os11g12360.1 Oryza sativa subsp. japonica|M-type_MADS|M-type_MADS family protein	198356	4.30579e-24	80.9524	99.3673	63	51
TRINITY_DN381263_c0_g1_i1	HD-ZIP	216	gnl|BL_ORD_ID|269681Sopen09g021360.1 Solanum pennellii|HD-ZIP|HD-ZIP family protein	269681	7.16566e-25	76.3889	101.679	72	55
TRINITY_DN399723_c1_g1_i1	B3	230	gnl|BL_ORD_ID|270074Sopen03g007470.2 Solanum pennellii|B3|B3 family protein	270074	4.89072e-11	51.4286	61.6178	70	36
TRINITY_DN404363_c3_g1_i1	MYB	230	gnl|BL_ORD_ID|20187EMT20255 Aegilops tauschii|MYB|MYB family protein	20187	5.39167e-34	82.8947	123.25	76	63
TRINITY_DN410790_c1_g3_i1	NAC	203	gnl|BL_ORD_ID|20269EMT14186 Aegilops tauschii|NAC|NAC family protein	20269	3.85069e-19	89.0909	80.8777	55	49
TRINITY_DN414791_c0_g1_i2	NAC	310	gnl|BL_ORD_ID|128048Itr_sc004419.1_g00003.1 Ipomoea trifida|NAC|NAC family protein	128048	1.34861e-15	58.3333	76.2554	108	63
TRINITY_DN428261_c0_g3_i1	NAC	253	gnl|BL_ORD_ID|296846TRIUR3_11787-P1 Triticum urartu|NAC|NAC family protein	296846	2.19615e-30	87.5	114.775	64	56
TRINITY_DN433490_c3_g3_i1	TCP	242	gnl|BL_ORD_ID|270237Sopen12g015990.1 Solanum pennellii|TCP|TCP family protein	270237	6.30549e-26	81.25	105.145	80	65
TRINITY_DN448269_c0_g1_i1	FAR1	227	gnl|BL_ORD_ID|199065LOC_Os04g22990.1 Oryza sativa subsp. japonica|FAR1|FAR1 family protein	199065	3.24143e-31	85.1351	120.168	74	63
TRINITY_DN464711_c28_g5_i2	bHLH	397	gnl|BL_ORD_ID|258656676783878 Sisymbrium irio|bHLH|bHLH family protein	258656	0.00010528	67.2414	43.5134	58	39
TRINITY_DN470023_c4_g3_i1	MYB	242	gnl|BL_ORD_ID|20187EMT20255 Aegilops tauschii|MYB|MYB family protein	20187	2.46563e-06	55.7377	46.9802	61	34
TRINITY_DN471932_c1_g1_i1	HSF	205	gnl|BL_ORD_ID|296654TRIUR3_19594-P1 Triticum urartu|HSF|HSF family protein	296654	4.04032e-11	88.5714	60.8474	35	31
TRINITY_DN481263_c2_g6_i1	NAC	227	gnl|BL_ORD_ID|296846TRIUR3_11787-P1 Triticum urartu|NAC|NAC family protein	296846	6.18152e-20	81.1321	85.8853	53	43
TRINITY_DN484653_c4_g9_i1	HD-ZIP	204	gnl|BL_ORD_ID|269681Sopen09g021360.1 Solanum pennellii|HD-ZIP|HD-ZIP family protein	269681	9.93445e-21	77.6119	89.3521	67	52
TRINITY_DN491626_c12_g5_i1	NAC	250	gnl|BL_ORD_ID|20708EMT33859 Aegilops tauschii|NAC|NAC family protein	20708	3.49679e-06	67.4419	46.9802	43	29
TRINITY_DN50054_c1_g1_i1	NAC	202	gnl|BL_ORD_ID|128048Itr_sc004419.1_g00003.1 Ipomoea trifida|NAC|NAC family protein	128048	5.32694e-07	68.5185	49.2914	54	37
TRINITY_DN519628_c12_g11_i4	M-type_MADS	544	gnl|BL_ORD_ID|198356LOC_Os11g12360.1 Oryza sativa subsp. japonica|M-type_MADS|M-type_MADS family protein	198356	3.83987e-26	56.3536	109.768	181	102
TRINITY_DN468458_c5_g2_i3	GRAS	206	gnl|BL_ORD_ID|296836TRIUR3_07891-P1 Triticum urartu|GRAS|GRAS family protein	296836	0.00252766	60	37.7354	50	30
TRINITY_DN23616_c0_g1_i1	ZF-HD	240	gnl|BL_ORD_ID|269698Sopen05g016700.1 Solanum pennellii|ZF-HD|ZF-HD family protein	269698	7.22476e-05	52.459	43.5134	61	32
TRINITY_DN495982_c16_g5_i1	bHLH	408	gnl|BL_ORD_ID|297244TRIUR3_29035-P1 Triticum urartu|bHLH|bHLH family protein	297244	1.33645e-14	97.3684	73.1738	38	37
TRINITY_DN517362_c27_g9_i1	NAC	268	gnl|BL_ORD_ID|296846TRIUR3_11787-P1 Triticum urartu|NAC|NAC family protein	296846	1.0651e-10	71.7391	60.4622	46	33
TRINITY_DN430331_c0_g1_i1	MYB	224	gnl|BL_ORD_ID|270945Sopim09g007570.0.1 Solanum pimpinellifolium|MYB_related|MYB_related family protein	270945	0.047193	51.2195	33.8834	41	21
TRINITY_DN523467_c37_g3_i5	TCP	2472	gnl|BL_ORD_ID|270237Sopen12g015990.1 Solanum pennellii|TCP|TCP family protein	270237	0	69.4301	808.52	772	536
TRINITY_DN477688_c10_g9_i1	HD-ZIP	294	gnl|BL_ORD_ID|82545Dca2137.1 Dianthus caryophyllus|HD-ZIP|HD-ZIP family protein	82545	1.99876e-25	78.0488	103.605	82	64
TRINITY_DN502918_c5_g6_i3	ZF-HD	202	gnl|BL_ORD_ID|269698Sopen05g016700.1 Solanum pennellii|ZF-HD|ZF-HD family protein	269698	7.58003e-23	74.2424	95.5153	66	49
TRINITY_DN523402_c11_g7_i3	M-type_MADS	306	gnl|BL_ORD_ID|198356LOC_Os11g12360.1 Oryza sativa subsp. japonica|M-type_MADS|M-type_MADS family protein	198356	1.66071e-17	56.5657	81.6481	99	56
TRINITY_DN471685_c10_g4_i1	HD-ZIP	243	gnl|BL_ORD_ID|82545Dca2137.1 Dianthus caryophyllus|HD-ZIP|HD-ZIP family protein	82545	7.05862e-05	51.8987	43.1282	79	41
TRINITY_DN289021_c1_g1_i1	ZF-HD	204	gnl|BL_ORD_ID|269698Sopen05g016700.1 Solanum pennellii|ZF-HD|ZF-HD family protein	269698	6.86136e-15	67.1642	72.4034	67	45
TRINITY_DN523707_c6_g2_i1	NF-YC	2353	gnl|BL_ORD_ID|269751Sopen03g030560.1 Solanum pennellii|NF-YC|NF-YC family protein	269751	7.0179e-79	68.7273	280.026	275	189
TRINITY_DN487438_c6_g4_i1	FAR1	320	gnl|BL_ORD_ID|199065LOC_Os04g22990.1 Oryza sativa subsp. japonica|FAR1|FAR1 family protein	199065	1.05839e-14	55.2381	73.559	105	58
TRINITY_DN286131_c2_g2_i2	NAC	214	gnl|BL_ORD_ID|296846TRIUR3_11787-P1 Triticum urartu|NAC|NAC family protein	296846	1.94607e-14	76.5957	70.4774	47	36
TRINITY_DN377739_c0_g1_i2	NAC	236	gnl|BL_ORD_ID|296685TRIUR3_29857-P1 Triticum urartu|NAC|NAC family protein	296685	1.19863e-24	91.0256	99.7525	78	71
TRINITY_DN379461_c0_g1_i1	NAC	225	gnl|BL_ORD_ID|296846TRIUR3_11787-P1 Triticum urartu|NAC|NAC family protein	296846	1.21007e-27	83.3333	106.686	66	55
TRINITY_DN429943_c0_g3_i1	ERF	248	gnl|BL_ORD_ID|270781Sopen11g017580.1 Solanum pennellii|ERF|ERF family protein	270781	0.0213563	61.5385	35.4242	39	24
TRINITY_DN471015_c9_g5_i2	NAC	256	gnl|BL_ORD_ID|128048Itr_sc004419.1_g00003.1 Ipomoea trifida|NAC|NAC family protein	128048	5.77313e-09	59.0361	55.8398	83	49
TRINITY_DN491395_c7_g1_i1	NAC	205	gnl|BL_ORD_ID|296846TRIUR3_11787-P1 Triticum urartu|NAC|NAC family protein	296846	2.72578e-18	88.8889	80.8777	45	40
TRINITY_DN495192_c1_g10_i2	ERF	251	gnl|BL_ORD_ID|291652XP_010556248.1 Tarenaya hassleriana|ERF|ERF family protein	291652	1.44342e-27	79.2683	109.768	82	65
TRINITY_DN515549_c18_g6_i14	WRKY	416	gnl|BL_ORD_ID|297335TRIUR3_28409-P1 Triticum urartu|WRKY|WRKY family protein	297335	0.00103342	60.4651	40.817	43	26
TRINITY_DN502385_c35_g1_i3	NAC	496	gnl|BL_ORD_ID|128048Itr_sc004419.1_g00003.1 Ipomoea trifida|NAC|NAC family protein	128048	7.27772e-11	55.7692	63.929	104	58
TRINITY_DN494860_c10_g7_i7	NAC	509	gnl|BL_ORD_ID|128048Itr_sc004419.1_g00003.1 Ipomoea trifida|NAC|NAC family protein	128048	1.08268e-31	59.375	125.561	160	95
TRINITY_DN523813_c72_g2_i2	NAC	268	gnl|BL_ORD_ID|128048Itr_sc004419.1_g00003.1 Ipomoea trifida|NAC|NAC family protein	128048	2.29248e-13	62.1951	68.9366	82	51
TRINITY_DN476206_c7_g2_i1	NAC	213	gnl|BL_ORD_ID|128048Itr_sc004419.1_g00003.1 Ipomoea trifida|NAC|NAC family protein	128048	1.33417e-17	70.5882	80.4925	68	48
TRINITY_DN519778_c28_g12_i1	M-type_MADS	212	gnl|BL_ORD_ID|198356LOC_Os11g12360.1 Oryza sativa subsp. japonica|M-type_MADS|M-type_MADS family protein	198356	3.13613e-19	71.0526	85.1149	76	54
TRINITY_DN475153_c14_g14_i2	B3	426	gnl|BL_ORD_ID|269643Sopen03g007470.1 Solanum pennellii|B3|B3 family protein	269643	2.48698e-20	53.0303	90.8929	132	70
TRINITY_DN523719_c10_g1_i1	FAR1	953	gnl|BL_ORD_ID|21470EMT09295 Aegilops tauschii|FAR1|FAR1 family protein	21470	3.33814e-43	98.9899	160.999	99	98
TRINITY_DN498538_c8_g5_i1	HD-ZIP	303	gnl|BL_ORD_ID|217498PH01000841G0210 Phyllostachys heterocycla|HD-ZIP|HD-ZIP family protein	217498	5.37944e-10	63.6364	59.3066	66	42
TRINITY_DN369984_c1_g1_i1	FAR1	214	gnl|BL_ORD_ID|199065LOC_Os04g22990.1 Oryza sativa subsp. japonica|FAR1|FAR1 family protein	199065	1.22615e-16	64.7887	77.7962	71	46
TRINITY_DN424010_c1_g1_i1	ZF-HD	241	gnl|BL_ORD_ID|269698Sopen05g016700.1 Solanum pennellii|ZF-HD|ZF-HD family protein	269698	2.5981e-10	69.0909	59.6918	55	38
TRINITY_DN458076_c0_g1_i3	TCP	256	gnl|BL_ORD_ID|270237Sopen12g015990.1 Solanum pennellii|TCP|TCP family protein	270237	2.65337e-30	80	117.857	80	64
TRINITY_DN465958_c1_g1_i6	NAC	306	gnl|BL_ORD_ID|128048Itr_sc004419.1_g00003.1 Ipomoea trifida|NAC|NAC family protein	128048	3.49935e-16	65.0943	77.7962	106	69
TRINITY_DN467582_c9_g7_i1	ERF	213	gnl|BL_ORD_ID|291652XP_010556248.1 Tarenaya hassleriana|ERF|ERF family protein	291652	4.23607e-20	72.4638	87.4261	69	50
TRINITY_DN472298_c16_g8_i1	B3	221	gnl|BL_ORD_ID|297270TRIUR3_16915-P1 Triticum urartu|B3|B3 family protein	297270	1.49601e-14	77.7778	71.2478	45	35
TRINITY_DN473628_c3_g1_i1	M-type_MADS	300	gnl|BL_ORD_ID|198356LOC_Os11g12360.1 Oryza sativa subsp. japonica|M-type_MADS|M-type_MADS family protein	198356	4.44951e-18	57.6087	83.1889	92	53
TRINITY_DN478496_c9_g2_i2	ZF-HD	232	gnl|BL_ORD_ID|269698Sopen05g016700.1 Solanum pennellii|ZF-HD|ZF-HD family protein	269698	1.06095e-10	63.75	60.8474	80	51
TRINITY_DN478955_c38_g5_i3	FAR1	208	gnl|BL_ORD_ID|199065LOC_Os04g22990.1 Oryza sativa subsp. japonica|FAR1|FAR1 family protein	199065	4.95238e-05	53.3333	43.5134	60	32
TRINITY_DN487669_c4_g4_i1	HD-ZIP	252	gnl|BL_ORD_ID|269681Sopen09g021360.1 Solanum pennellii|HD-ZIP|HD-ZIP family protein	269681	9.2408e-28	74.6988	110.538	83	62
TRINITY_DN487669_c4_g9_i3	ERF	271	gnl|BL_ORD_ID|291652XP_010556248.1 Tarenaya hassleriana|ERF|ERF family protein	291652	4.99342e-26	69.6629	105.531	89	62
TRINITY_DN493458_c8_g5_i2	FAR1	271	gnl|BL_ORD_ID|199065LOC_Os04g22990.1 Oryza sativa subsp. japonica|FAR1|FAR1 family protein	199065	1.10145e-27	72.7273	110.538	88	64
TRINITY_DN505170_c2_g1_i1	TCP	209	gnl|BL_ORD_ID|270237Sopen12g015990.1 Solanum pennellii|TCP|TCP family protein	270237	1.61625e-21	75.4098	91.6633	61	46
TRINITY_DN507754_c10_g6_i3	B3	281	gnl|BL_ORD_ID|296246TRIUR3_32580-P1 Triticum urartu|B3|B3 family protein	296246	6.80388e-05	55.0725	43.1282	69	38
TRINITY_DN91171_c0_g3_i1	bHLH	224	gnl|BL_ORD_ID|296394TRIUR3_31817-P1 Triticum urartu|bHLH|bHLH family protein	296394	2.85382e-16	92.5	74.7146	40	37
TRINITY_DN523890_c8_g9_i3	Dof	1027	gnl|BL_ORD_ID|314009Zmw_sc00634.1.g00020.1 Zoysia matrella|Dof|Dof family protein	314009	3.37211e-05	41.0596	48.9062	151	62
TRINITY_DN523420_c3_g11_i1	M-type_MADS	214	gnl|BL_ORD_ID|198356LOC_Os11g12360.1 Oryza sativa subsp. japonica|M-type_MADS|M-type_MADS family protein	198356	0.0483033	46.6667	34.2686	60	28
TRINITY_DN475864_c5_g12_i1	M-type_MADS	297	gnl|BL_ORD_ID|198356LOC_Os11g12360.1 Oryza sativa subsp. japonica|M-type_MADS|M-type_MADS family protein	198356	5.00565e-10	50.5882	59.3066	85	43
TRINITY_DN520833_c13_g6_i4	G2-like	266	gnl|BL_ORD_ID|97663FANhyb_rscf00000398.1.g00005.1 Fragaria x ananassa|G2-like|G2-like family protein	97663	1.47269e-18	62.5	83.5741	88	55
TRINITY_DN472585_c5_g5_i1	M-type_MADS	212	gnl|BL_ORD_ID|198356LOC_Os11g12360.1 Oryza sativa subsp. japonica|M-type_MADS|M-type_MADS family protein	198356	1.924e-19	72.4638	85.8853	69	50
TRINITY_DN497173_c5_g5_i2	B3	252	gnl|BL_ORD_ID|270192Sopen00g003940.1 Solanum pennellii|B3|B3 family protein	270192	0.000477742	48.75	40.817	80	39
TRINITY_DN523883_c16_g1_i1	TCP	650	gnl|BL_ORD_ID|270237Sopen12g015990.1 Solanum pennellii|TCP|TCP family protein	270237	3.38928e-63	68.3036	218.779	224	153
TRINITY_DN277249_c0_g1_i1	FAR1	221	gnl|BL_ORD_ID|199065LOC_Os04g22990.1 Oryza sativa subsp. japonica|FAR1|FAR1 family protein	199065	5.89269e-27	76.7123	107.457	73	56
TRINITY_DN352206_c0_g1_i2	TCP	230	gnl|BL_ORD_ID|270237Sopen12g015990.1 Solanum pennellii|TCP|TCP family protein	270237	4.54353e-31	88.8889	119.783	72	64
TRINITY_DN411255_c1_g2_i1	NAC	291	gnl|BL_ORD_ID|20708EMT33859 Aegilops tauschii|NAC|NAC family protein	20708	0.000315383	67.5676	41.5874	37	25
TRINITY_DN415644_c1_g3_i1	TCP	217	gnl|BL_ORD_ID|270237Sopen12g015990.1 Solanum pennellii|TCP|TCP family protein	270237	3.84502e-09	69.0909	55.8398	55	38
TRINITY_DN443224_c0_g4_i1	ERF	244	gnl|BL_ORD_ID|291652XP_010556248.1 Tarenaya hassleriana|ERF|ERF family protein	291652	3.62234e-18	82.7586	82.4185	58	48
TRINITY_DN447528_c1_g1_i1	FAR1	210	gnl|BL_ORD_ID|199065LOC_Os04g22990.1 Oryza sativa subsp. japonica|FAR1|FAR1 family protein	199065	2.57955e-07	51.4706	50.447	68	35
TRINITY_DN451125_c7_g6_i2	NAC	285	gnl|BL_ORD_ID|128048Itr_sc004419.1_g00003.1 Ipomoea trifida|NAC|NAC family protein	128048	1.14794e-12	60.4651	67.0106	86	52
TRINITY_DN464785_c4_g4_i1	NAC	215	gnl|BL_ORD_ID|296846TRIUR3_11787-P1 Triticum urartu|NAC|NAC family protein	296846	1.16725e-05	63.8889	45.0542	36	23
TRINITY_DN468342_c5_g2_i4	HD-ZIP	208	gnl|BL_ORD_ID|269681Sopen09g021360.1 Solanum pennellii|HD-ZIP|HD-ZIP family protein	269681	3.28317e-05	64.1026	43.8986	39	25
TRINITY_DN480694_c24_g2_i11	C2H2	283	gnl|BL_ORD_ID|297126TRIUR3_34542-P1 Triticum urartu|C2H2|C2H2 family protein	297126	4.43598e-14	71.6667	70.0922	60	43
TRINITY_DN480768_c4_g11_i1	FAR1	243	gnl|BL_ORD_ID|81473Dca46628.1 Dianthus caryophyllus|FAR1|FAR1 family protein	81473	2.97839e-18	66.2338	79.7221	77	51
TRINITY_DN485455_c32_g1_i7	FAR1	339	gnl|BL_ORD_ID|199065LOC_Os04g22990.1 Oryza sativa subsp. japonica|FAR1|FAR1 family protein	199065	3.6344e-16	53.3981	78.1814	103	55
TRINITY_DN490351_c5_g4_i1	FAR1	266	gnl|BL_ORD_ID|199065LOC_Os04g22990.1 Oryza sativa subsp. japonica|FAR1|FAR1 family protein	199065	1.41149e-36	78.1609	135.961	87	68
TRINITY_DN491100_c8_g4_i1	FAR1	205	gnl|BL_ORD_ID|199065LOC_Os04g22990.1 Oryza sativa subsp. japonica|FAR1|FAR1 family protein	199065	2.55284e-18	73.5294	82.4185	68	50
TRINITY_DN491812_c2_g5_i1	M-type_MADS	203	gnl|BL_ORD_ID|198356LOC_Os11g12360.1 Oryza sativa subsp. japonica|M-type_MADS|M-type_MADS family protein	198356	3.55756e-12	78.2609	64.6994	46	36
TRINITY_DN494233_c22_g5_i1	ERF	248	gnl|BL_ORD_ID|20250EMT26591 Aegilops tauschii|ERF|ERF family protein	20250	3.58491e-28	93.9024	104.375	82	77
TRINITY_DN496107_c2_g1_i1	TCP	226	gnl|BL_ORD_ID|270237Sopen12g015990.1 Solanum pennellii|TCP|TCP family protein	270237	1.79172e-22	80.8219	94.7449	73	59
TRINITY_DN505411_c208_g1_i1	FAR1	329	gnl|BL_ORD_ID|199065LOC_Os04g22990.1 Oryza sativa subsp. japonica|FAR1|FAR1 family protein	199065	5.21932e-05	52.1739	44.2838	69	36
TRINITY_DN521745_c2_g6_i1	C2H2	590	gnl|BL_ORD_ID|29935GSBRNA2T00007305001 Brassica napus|C2H2|C2H2 family protein	29935	0.0100289	46.3415	38.891	82	38
TRINITY_DN475627_c17_g7_i1	FAR1	219	gnl|BL_ORD_ID|199065LOC_Os04g22990.1 Oryza sativa subsp. japonica|FAR1|FAR1 family protein	199065	4.85255e-23	73.6111	96.2857	72	53
TRINITY_DN489437_c15_g2_i3	B3	449	gnl|BL_ORD_ID|20166EMT01685 Aegilops tauschii|B3|B3 family protein	20166	0.00807077	51.0638	38.5058	94	48
TRINITY_DN523813_c70_g5_i1	FAR1	236	gnl|BL_ORD_ID|199065LOC_Os04g22990.1 Oryza sativa subsp. japonica|FAR1|FAR1 family protein	199065	9.25914e-25	70.5128	101.679	78	55
TRINITY_DN476159_c33_g2_i1	FAR1	210	gnl|BL_ORD_ID|199065LOC_Os04g22990.1 Oryza sativa subsp. japonica|FAR1|FAR1 family protein	199065	9.08235e-08	54.5455	51.6026	66	36
TRINITY_DN455931_c7_g6_i3	FAR1	227	gnl|BL_ORD_ID|21158EMT21149 Aegilops tauschii|FAR1|FAR1 family protein	21158	1.29225e-25	84.375	103.219	64	54
TRINITY_DN522088_c116_g3_i1	NAC	1195	gnl|BL_ORD_ID|128048Itr_sc004419.1_g00003.1 Ipomoea trifida|NAC|NAC family protein	128048	1.81384e-47	55.4795	179.874	292	162
TRINITY_DN477688_c10_g9_i2	HD-ZIP	279	gnl|BL_ORD_ID|82545Dca2137.1 Dianthus caryophyllus|HD-ZIP|HD-ZIP family protein	82545	2.72791e-31	83.5294	119.783	85	71
TRINITY_DN372266_c0_g2_i1	HD-ZIP	201	gnl|BL_ORD_ID|82545Dca2137.1 Dianthus caryophyllus|HD-ZIP|HD-ZIP family protein	82545	2.33959e-21	77.7778	90.5077	63	49
TRINITY_DN288248_c1_g1_i2	FAR1	231	gnl|BL_ORD_ID|199065LOC_Os04g22990.1 Oryza sativa subsp. japonica|FAR1|FAR1 family protein	199065	8.50553e-16	60.8108	75.485	74	45
TRINITY_DN317926_c1_g1_i1	ZF-HD	238	gnl|BL_ORD_ID|269698Sopen05g016700.1 Solanum pennellii|ZF-HD|ZF-HD family protein	269698	6.61517e-07	55	49.6766	80	44
TRINITY_DN331992_c2_g1_i1	FAR1	207	gnl|BL_ORD_ID|199065LOC_Os04g22990.1 Oryza sativa subsp. japonica|FAR1|FAR1 family protein	199065	1.62517e-11	58.209	62.7734	67	39
TRINITY_DN443697_c2_g3_i5	NAC	294	gnl|BL_ORD_ID|128048Itr_sc004419.1_g00003.1 Ipomoea trifida|NAC|NAC family protein	128048	1.42564e-16	58.9474	78.5666	95	56
TRINITY_DN45106_c0_g2_i1	C2H2	223	gnl|BL_ORD_ID|297334TRIUR3_22340-P1 Triticum urartu|C2H2|C2H2 family protein	297334	0.00439041	59.0909	35.8094	44	26
TRINITY_DN451125_c7_g3_i1	NAC	236	gnl|BL_ORD_ID|128048Itr_sc004419.1_g00003.1 Ipomoea trifida|NAC|NAC family protein	128048	2.09686e-07	60.2941	50.8322	68	41
TRINITY_DN451689_c5_g6_i1	NAC	213	gnl|BL_ORD_ID|128048Itr_sc004419.1_g00003.1 Ipomoea trifida|NAC|NAC family protein	128048	9.46074e-10	62.2951	57.7658	61	38
TRINITY_DN453159_c0_g1_i1	ZF-HD	204	gnl|BL_ORD_ID|269698Sopen05g016700.1 Solanum pennellii|ZF-HD|ZF-HD family protein	269698	1.75407e-25	83.5821	103.219	67	56
TRINITY_DN453475_c1_g2_i1	TCP	231	gnl|BL_ORD_ID|270237Sopen12g015990.1 Solanum pennellii|TCP|TCP family protein	270237	2.38756e-33	85.3333	126.331	75	64
TRINITY_DN480845_c12_g4_i1	NAC	219	gnl|BL_ORD_ID|296846TRIUR3_11787-P1 Triticum urartu|NAC|NAC family protein	296846	9.93921e-10	68.0851	56.9954	47	32
TRINITY_DN487037_c5_g3_i1	NAC	266	gnl|BL_ORD_ID|296846TRIUR3_11787-P1 Triticum urartu|NAC|NAC family protein	296846	3.60544e-21	63.7363	89.7373	91	58
TRINITY_DN501540_c4_g5_i1	HD-ZIP	212	gnl|BL_ORD_ID|269681Sopen09g021360.1 Solanum pennellii|HD-ZIP|HD-ZIP family protein	269681	2.88036e-30	88.0597	117.087	67	59
TRINITY_DN446581_c0_g3_i1	ZF-HD	217	gnl|BL_ORD_ID|269698Sopen05g016700.1 Solanum pennellii|ZF-HD|ZF-HD family protein	269698	9.44609e-22	77.4648	92.8189	71	55
TRINITY_DN495192_c1_g1_i2	ERF	229	gnl|BL_ORD_ID|291652XP_010556248.1 Tarenaya hassleriana|ERF|ERF family protein	291652	2.96147e-21	76	90.8929	75	57
TRINITY_DN414791_c0_g1_i3	NAC	283	gnl|BL_ORD_ID|128048Itr_sc004419.1_g00003.1 Ipomoea trifida|NAC|NAC family protein	128048	1.30696e-13	65.3846	70.0922	78	51
TRINITY_DN473032_c10_g8_i2	ZF-HD	215	gnl|BL_ORD_ID|269698Sopen05g016700.1 Solanum pennellii|ZF-HD|ZF-HD family protein	269698	0.0456261	52.1127	34.2686	71	37
TRINITY_DN334043_c0_g1_i2	FAR1	295	gnl|BL_ORD_ID|21158EMT21149 Aegilops tauschii|FAR1|FAR1 family protein	21158	3.4754e-26	87.0968	105.531	62	54
TRINITY_DN117348_c0_g4_i2	MYB	202	gnl|BL_ORD_ID|129823Jcr4S05030.40 Jatropha curcas|MYB|MYB family protein	129823	0.00139466	57.8947	38.891	57	33
TRINITY_DN520815_c26_g10_i1	CAMTA	264	gnl|BL_ORD_ID|217041PH01000201G0710 Phyllostachys heterocycla|CAMTA|CAMTA family protein	217041	3.0094e-35	84.1463	131.724	82	69
TRINITY_DN102280_c1_g2_i3	ERF	240	gnl|BL_ORD_ID|291652XP_010556248.1 Tarenaya hassleriana|ERF|ERF family protein	291652	1.90093e-28	87.013	112.079	77	67
TRINITY_DN339823_c1_g2_i1	HD-ZIP	213	gnl|BL_ORD_ID|269681Sopen09g021360.1 Solanum pennellii|HD-ZIP|HD-ZIP family protein	269681	6.56131e-27	78.8732	107.457	71	56
TRINITY_DN356158_c1_g1_i1	TCP	255	gnl|BL_ORD_ID|270237Sopen12g015990.1 Solanum pennellii|TCP|TCP family protein	270237	1.70121e-34	80.9524	129.798	84	68
TRINITY_DN453475_c1_g6_i1	ERF	217	gnl|BL_ORD_ID|291652XP_010556248.1 Tarenaya hassleriana|ERF|ERF family protein	291652	7.826e-20	72.2222	86.6557	72	52
TRINITY_DN466066_c1_g5_i2	ERF	318	gnl|BL_ORD_ID|291652XP_010556248.1 Tarenaya hassleriana|ERF|ERF family protein	291652	0.0151468	57.4468	36.5798	47	27
TRINITY_DN468704_c2_g1_i1	bHLH	234	gnl|BL_ORD_ID|220601PSME_00039285-RA Pseudotsuga menziesii|bHLH|bHLH family protein	220601	0.00563448	58.3333	36.965	60	35
TRINITY_DN478272_c23_g3_i1	FAR1	219	gnl|BL_ORD_ID|199065LOC_Os04g22990.1 Oryza sativa subsp. japonica|FAR1|FAR1 family protein	199065	4.23517e-11	57.8125	61.6178	64	37
TRINITY_DN482896_c7_g2_i1	NAC	457	gnl|BL_ORD_ID|296846TRIUR3_11787-P1 Triticum urartu|NAC|NAC family protein	296846	2.30685e-13	58.9744	70.0922	78	46
TRINITY_DN48854_c0_g1_i1	LBD	219	gnl|BL_ORD_ID|250519Rsa1.0_02878.1_g00005.1 Raphanus sativus|LBD|LBD family protein	250519	0.000594759	50.9091	40.4318	55	28
TRINITY_DN496883_c8_g5_i2	NAC	341	gnl|BL_ORD_ID|155192Manes.12G156800.1.p Manihot esculenta|NAC|NAC family protein	155192	0.0202614	45.0704	35.8094	71	32
TRINITY_DN484382_c8_g1_i1	FAR1	207	gnl|BL_ORD_ID|199065LOC_Os04g22990.1 Oryza sativa subsp. japonica|FAR1|FAR1 family protein	199065	1.00163e-12	71.4286	66.2402	63	45
TRINITY_DN487421_c10_g2_i2	FAR1	225	gnl|BL_ORD_ID|199065LOC_Os04g22990.1 Oryza sativa subsp. japonica|FAR1|FAR1 family protein	199065	6.07537e-12	59.4203	64.3142	69	41
TRINITY_DN493879_c29_g2_i3	NAC	201	gnl|BL_ORD_ID|296846TRIUR3_11787-P1 Triticum urartu|NAC|NAC family protein	296846	6.46265e-19	89.5833	82.8037	48	43
TRINITY_DN420243_c1_g2_i1	HD-ZIP	209	gnl|BL_ORD_ID|180158OBART08G09450.1 Oryza barthii|HD-ZIP|HD-ZIP family protein	180158	0.0364703	50	34.6538	48	24
TRINITY_DN440831_c1_g2_i1	FAR1	210	gnl|BL_ORD_ID|199065LOC_Os04g22990.1 Oryza sativa subsp. japonica|FAR1|FAR1 family protein	199065	6.41986e-07	53.7313	49.2914	67	36
TRINITY_DN522213_c53_g4_i1	C2H2	2541	gnl|BL_ORD_ID|253877Sphfalx0228s0001.1.p Sphagnum fallax|C2H2|C2H2 family protein	253877	2.76151e-19	63.7363	95.5153	91	58
TRINITY_DN515549_c18_g6_i18	WRKY	482	gnl|BL_ORD_ID|297335TRIUR3_28409-P1 Triticum urartu|WRKY|WRKY family protein	297335	0.00189317	60.4651	40.4318	43	26
TRINITY_DN400296_c0_g2_i1	ZF-HD	205	gnl|BL_ORD_ID|269698Sopen05g016700.1 Solanum pennellii|ZF-HD|ZF-HD family protein	269698	2.62733e-29	86.5672	114.39	67	58
TRINITY_DN519560_c43_g8_i3	TCP	390	gnl|BL_ORD_ID|270237Sopen12g015990.1 Solanum pennellii|TCP|TCP family protein	270237	2.02672e-32	72.7941	125.946	136	99
TRINITY_DN347367_c1_g2_i1	GRAS	282	gnl|BL_ORD_ID|58251C.cajan_27185 Cajanus cajan|GRAS|GRAS family protein	58251	0.00129293	58.1081	39.6614	74	43
TRINITY_DN266211_c0_g1_i1	ZF-HD	219	gnl|BL_ORD_ID|269698Sopen05g016700.1 Solanum pennellii|ZF-HD|ZF-HD family protein	269698	9.8247e-24	85	98.5969	60	51
TRINITY_DN286131_c2_g1_i2	bHLH	247	gnl|BL_ORD_ID|296394TRIUR3_31817-P1 Triticum urartu|bHLH|bHLH family protein	296394	4.78718e-17	92.6829	77.0258	41	38
TRINITY_DN303547_c0_g1_i1	B3	213	gnl|BL_ORD_ID|270192Sopen00g003940.1 Solanum pennellii|B3|B3 family protein	270192	0.000149804	42.3077	41.9726	52	22
TRINITY_DN415305_c0_g1_i1	HD-ZIP	244	gnl|BL_ORD_ID|269681Sopen09g021360.1 Solanum pennellii|HD-ZIP|HD-ZIP family protein	269681	0.0094163	46.9136	36.5798	81	38
TRINITY_DN467402_c3_g2_i1	ERF	218	gnl|BL_ORD_ID|20250EMT26591 Aegilops tauschii|ERF|ERF family protein	20250	1.16109e-27	88.8889	102.834	72	64
TRINITY_DN471383_c4_g1_i2	FAR1	281	gnl|BL_ORD_ID|199065LOC_Os04g22990.1 Oryza sativa subsp. japonica|FAR1|FAR1 family protein	199065	4.06401e-29	72.043	114.775	93	67
TRINITY_DN476206_c6_g3_i10	NAC	283	gnl|BL_ORD_ID|128048Itr_sc004419.1_g00003.1 Ipomoea trifida|NAC|NAC family protein	128048	1.95808e-20	63.4409	89.7373	93	59
TRINITY_DN521689_c8_g7_i4	ERF	243	gnl|BL_ORD_ID|291652XP_010556248.1 Tarenaya hassleriana|ERF|ERF family protein	291652	5.85803e-11	62.963	61.6178	81	51
TRINITY_DN523813_c77_g2_i6	NAC	278	gnl|BL_ORD_ID|128048Itr_sc004419.1_g00003.1 Ipomoea trifida|NAC|NAC family protein	128048	3.7429e-11	61.2903	62.7734	93	57
TRINITY_DN474002_c6_g1_i1	M-type_MADS	243	gnl|BL_ORD_ID|81564Dca52167.1 Dianthus caryophyllus|M-type_MADS|M-type_MADS family protein	81564	5.38374e-06	55.5556	46.595	72	40
TRINITY_DN485717_c25_g7_i3	C2H2	299	gnl|BL_ORD_ID|297126TRIUR3_34542-P1 Triticum urartu|C2H2|C2H2 family protein	297126	5.87435e-14	78.2609	70.0922	46	36
TRINITY_DN349636_c0_g1_i1	M-type_MADS	243	gnl|BL_ORD_ID|270111Sopen06g019750.1 Solanum pennellii|M-type_MADS|M-type_MADS family protein	270111	1.48026e-10	63.2353	60.4622	68	43
TRINITY_DN460002_c0_g1_i1	NAC	317	gnl|BL_ORD_ID|296846TRIUR3_11787-P1 Triticum urartu|NAC|NAC family protein	296846	0.00364481	62.8571	38.1206	35	22
TRINITY_DN388543_c0_g1_i1	M-type_MADS	202	gnl|BL_ORD_ID|270111Sopen06g019750.1 Solanum pennellii|M-type_MADS|M-type_MADS family protein	270111	0.0355351	46.3768	34.6538	69	32
TRINITY_DN458791_c4_g3_i6	ERF	312	gnl|BL_ORD_ID|270781Sopen11g017580.1 Solanum pennellii|ERF|ERF family protein	270781	9.51545e-13	59.5745	67.781	94	56
TRINITY_DN471265_c6_g5_i1	MYB	302	gnl|BL_ORD_ID|20187EMT20255 Aegilops tauschii|MYB|MYB family protein	20187	6.46293e-15	80.4348	72.0182	46	37
TRINITY_DN242477_c0_g1_i1	Trihelix	201	gnl|BL_ORD_ID|297027TRIUR3_33328-P1 Triticum urartu|Trihelix|Trihelix family protein	297027	1.53527e-10	64.1791	59.6918	67	43
TRINITY_DN418693_c1_g5_i4	ZF-HD	285	gnl|BL_ORD_ID|269698Sopen05g016700.1 Solanum pennellii|ZF-HD|ZF-HD family protein	269698	2.49107e-09	58.6667	57.3806	75	44
TRINITY_DN458697_c0_g2_i1	ZF-HD	230	gnl|BL_ORD_ID|269698Sopen05g016700.1 Solanum pennellii|ZF-HD|ZF-HD family protein	269698	7.37303e-07	52.3077	49.2914	65	34
TRINITY_DN460971_c6_g1_i2	B3	260	gnl|BL_ORD_ID|269643Sopen03g007470.1 Solanum pennellii|B3|B3 family protein	269643	1.57659e-10	50.6329	60.077	79	40
TRINITY_DN467593_c63_g13_i1	FAR1	238	gnl|BL_ORD_ID|199065LOC_Os04g22990.1 Oryza sativa subsp. japonica|FAR1|FAR1 family protein	199065	0.0296024	50	35.039	80	40
TRINITY_DN468969_c7_g2_i1	ERF	213	gnl|BL_ORD_ID|291652XP_010556248.1 Tarenaya hassleriana|ERF|ERF family protein	291652	1.60243e-23	77.1429	97.4413	70	54
TRINITY_DN470447_c1_g2_i1	ERF	254	gnl|BL_ORD_ID|291652XP_010556248.1 Tarenaya hassleriana|ERF|ERF family protein	291652	4.7098e-25	70.2381	102.449	84	59
TRINITY_DN473695_c7_g1_i1	B3	210	gnl|BL_ORD_ID|20591EMT01999 Aegilops tauschii|B3|B3 family protein	20591	1.15984e-11	77.7778	62.3882	45	35
TRINITY_DN475412_c10_g3_i1	FAR1	235	gnl|BL_ORD_ID|199065LOC_Os04g22990.1 Oryza sativa subsp. japonica|FAR1|FAR1 family protein	199065	4.15295e-07	58.0247	50.0618	81	47
TRINITY_DN478066_c8_g5_i4	RAV	280	gnl|BL_ORD_ID|297348TRIUR3_24851-P1 Triticum urartu|RAV|RAV family protein	297348	7.97162e-11	55.1724	45.0542	58	32
TRINITY_DN483877_c6_g4_i1	NAC	278	gnl|BL_ORD_ID|128048Itr_sc004419.1_g00003.1 Ipomoea trifida|NAC|NAC family protein	128048	0.000180356	46.0526	42.3578	76	35
TRINITY_DN506290_c14_g17_i1	MYB	227	gnl|BL_ORD_ID|20187EMT20255 Aegilops tauschii|MYB|MYB family protein	20187	8.25167e-35	85.1351	125.561	74	63
TRINITY_DN508548_c10_g8_i2	FAR1	443	gnl|BL_ORD_ID|199065LOC_Os04g22990.1 Oryza sativa subsp. japonica|FAR1|FAR1 family protein	199065	4.11181e-19	49.6403	88.1965	139	69
TRINITY_DN522704_c15_g10_i1	Nin-like	754	gnl|BL_ORD_ID|311924GRMZM2G472589_P01 Zea mays|Nin-like|Nin-like family protein	311924	0.0153632	44.7368	39.6614	114	51
TRINITY_DN474565_c12_g1_i2	bHLH	202	gnl|BL_ORD_ID|20362EMT03170 Aegilops tauschii|bHLH|bHLH family protein	20362	3.48133e-17	80.4348	75.8702	46	37
TRINITY_DN481074_c2_g2_i2	MYB	292	gnl|BL_ORD_ID|296368TRIUR3_21241-P1 Triticum urartu|MYB|MYB family protein	296368	1.02297e-32	91.0448	121.709	67	61
TRINITY_DN523883_c15_g7_i3	ERF	494	gnl|BL_ORD_ID|291652XP_010556248.1 Tarenaya hassleriana|ERF|ERF family protein	291652	9.84777e-62	74.3902	210.69	164	122
TRINITY_DN487669_c4_g10_i1	ERF	232	gnl|BL_ORD_ID|291652XP_010556248.1 Tarenaya hassleriana|ERF|ERF family protein	291652	1.97744e-22	71.0526	94.3597	76	54
TRINITY_DN523486_c91_g6_i2	B3	361	gnl|BL_ORD_ID|270192Sopen00g003940.1 Solanum pennellii|B3|B3 family protein	270192	0.000374747	56.4103	41.9726	78	44
TRINITY_DN523989_c18_g5_i4	B3	586	gnl|BL_ORD_ID|46198Bv_001010_nrdw.t1 Beta vulgaris|B3|B3 family protein	46198	0.0107936	53.4884	39.2762	86	46
TRINITY_DN422406_c0_g1_i1	FAR1	202	gnl|BL_ORD_ID|21158EMT21149 Aegilops tauschii|FAR1|FAR1 family protein	21158	5.78616e-15	91.8919	72.4034	37	34
TRINITY_DN523948_c59_g5_i1	TCP	2629	gnl|BL_ORD_ID|270237Sopen12g015990.1 Solanum pennellii|TCP|TCP family protein	270237	0	74.3918	933.324	781	581
TRINITY_DN445192_c0_g3_i1	NAC	206	gnl|BL_ORD_ID|296846TRIUR3_11787-P1 Triticum urartu|NAC|NAC family protein	296846	4.2181e-16	88.0952	74.7146	42	37
TRINITY_DN462764_c0_g3_i1	ERF	215	gnl|BL_ORD_ID|270781Sopen11g017580.1 Solanum pennellii|ERF|ERF family protein	270781	7.87469e-26	75.7143	103.99	70	53
TRINITY_DN472037_c0_g1_i1	MYB	234	gnl|BL_ORD_ID|20187EMT20255 Aegilops tauschii|MYB|MYB family protein	20187	2.19207e-21	77.5862	88.5817	58	45
TRINITY_DN473998_c7_g2_i3	B3	239	gnl|BL_ORD_ID|269643Sopen03g007470.1 Solanum pennellii|B3|B3 family protein	269643	2.31113e-08	43.5897	53.5286	78	34
TRINITY_DN476544_c13_g4_i1	FAR1	215	gnl|BL_ORD_ID|199065LOC_Os04g22990.1 Oryza sativa subsp. japonica|FAR1|FAR1 family protein	199065	2.6441e-18	74.6479	82.4185	71	53
TRINITY_DN505626_c2_g3_i1	MYB	665	gnl|BL_ORD_ID|260096Seita.3G354900.1.p Setaria italica|MYB_related|MYB_related family protein	260096	3.87394e-13	56.701	70.8626	97	55
TRINITY_DN518018_c0_g9_i7	TCP	243	gnl|BL_ORD_ID|270237Sopen12g015990.1 Solanum pennellii|TCP|TCP family protein	270237	1.10338e-22	74.3243	95.9005	74	55
TRINITY_DN523899_c5_g1_i3	NAC	1840	gnl|BL_ORD_ID|164368Niben101Scf05629g00007.1 Nicotiana benthamiana|NAC|NAC family protein	164368	0.0036106	61.2245	42.743	49	30
TRINITY_DN464704_c19_g6_i1	NAC	206	gnl|BL_ORD_ID|296846TRIUR3_11787-P1 Triticum urartu|NAC|NAC family protein	296846	7.79892e-31	90.4762	115.161	63	57
TRINITY_DN475751_c14_g1_i7	NAC	285	gnl|BL_ORD_ID|128048Itr_sc004419.1_g00003.1 Ipomoea trifida|NAC|NAC family protein	128048	5.88606e-16	61.3636	76.6406	88	54
TRINITY_DN274230_c1_g8_i1	ERF	320	gnl|BL_ORD_ID|270781Sopen11g017580.1 Solanum pennellii|ERF|ERF family protein	270781	7.88153e-10	53.3333	46.9802	90	48
TRINITY_DN519880_c4_g1_i1	bHLH	214	gnl|BL_ORD_ID|295285Tp57577_TGAC_v2_mRNA34811 Trifolium pratense|bHLH|bHLH family protein	295285	1.19195e-16	65.2174	77.0258	69	45
TRINITY_DN441920_c4_g3_i1	NAC	325	gnl|BL_ORD_ID|128048Itr_sc004419.1_g00003.1 Ipomoea trifida|NAC|NAC family protein	128048	8.13425e-11	54.2857	62.003	105	57
TRINITY_DN478081_c13_g8_i1	AP2	202	gnl|BL_ORD_ID|16047663468 Micromonas sp. RCC299|AP2|AP2 family protein	160476	0.0343736	57.8947	34.2686	38	22
TRINITY_DN510531_c0_g1_i1	bHLH	3951	gnl|BL_ORD_ID|200934Ote100112080011 Ocimum tenuiflorum|bHLH|bHLH family protein	200934	0.00043093	65.2174	48.1358	46	30
TRINITY_DN512714_c29_g11_i2	GATA	775	gnl|BL_ORD_ID|296559TRIUR3_22272-P1 Triticum urartu|GATA|GATA family protein	296559	9.69406e-13	83.3333	70.0922	42	35
TRINITY_DN221666_c0_g1_i1	ZF-HD	241	gnl|BL_ORD_ID|269698Sopen05g016700.1 Solanum pennellii|ZF-HD|ZF-HD family protein	269698	1.04261e-17	71.4286	81.2629	84	60
TRINITY_DN100958_c0_g1_i1	NAC	216	gnl|BL_ORD_ID|128048Itr_sc004419.1_g00003.1 Ipomoea trifida|NAC|NAC family protein	128048	0.000408049	58.4906	40.817	53	31
TRINITY_DN346014_c0_g1_i1	M-type_MADS	366	gnl|BL_ORD_ID|198356LOC_Os11g12360.1 Oryza sativa subsp. japonica|M-type_MADS|M-type_MADS family protein	198356	1.3391e-13	69.8113	70.8626	53	37
TRINITY_DN389701_c0_g1_i1	C3H	216	gnl|BL_ORD_ID|171871XP_016440619.1 Nicotiana tabacum|C3H|C3H family protein	171871	3.19194e-08	59.2593	52.7582	54	32
TRINITY_DN430198_c7_g2_i1	FAR1	203	gnl|BL_ORD_ID|199065LOC_Os04g22990.1 Oryza sativa subsp. japonica|FAR1|FAR1 family protein	199065	0.0033073	49.2537	37.7354	67	33
TRINITY_DN460007_c1_g11_i1	FAR1	251	gnl|BL_ORD_ID|199065LOC_Os04g22990.1 Oryza sativa subsp. japonica|FAR1|FAR1 family protein	199065	3.2599e-20	69.8795	88.5817	83	58
TRINITY_DN460131_c10_g1_i10	HD-ZIP	375	gnl|BL_ORD_ID|131497WALNUT_00021290-RA Juglans regia|HD-ZIP|HD-ZIP family protein	131497	0.0092842	47.4576	37.3502	59	28
TRINITY_DN473565_c5_g2_i1	B3	318	gnl|BL_ORD_ID|269643Sopen03g007470.1 Solanum pennellii|B3|B3 family protein	269643	3.26089e-13	48.3146	68.5514	89	43
TRINITY_DN478496_c9_g2_i3	ZF-HD	320	gnl|BL_ORD_ID|269698Sopen05g016700.1 Solanum pennellii|ZF-HD|ZF-HD family protein	269698	5.37063e-17	62.8571	80.4925	105	66
TRINITY_DN490110_c13_g8_i1	HD-ZIP	365	gnl|BL_ORD_ID|216651PH01000183G0940 Phyllostachys heterocycla|HD-ZIP|HD-ZIP family protein	216651	0.0219363	50.7463	36.5798	67	34
TRINITY_DN375359_c0_g2_i2	TCP	225	gnl|BL_ORD_ID|270237Sopen12g015990.1 Solanum pennellii|TCP|TCP family protein	270237	3.91297e-07	61.2903	50.0618	62	38
TRINITY_DN474059_c9_g5_i2	FAR1	230	gnl|BL_ORD_ID|199065LOC_Os04g22990.1 Oryza sativa subsp. japonica|FAR1|FAR1 family protein	199065	3.21129e-09	57.1429	56.225	70	40
TRINITY_DN357567_c1_g1_i2	GATA	210	gnl|BL_ORD_ID|296559TRIUR3_22272-P1 Triticum urartu|GATA|GATA family protein	296559	3.96667e-12	66.0714	63.5438	56	37
TRINITY_DN510476_c4_g1_i3	M-type_MADS	587	gnl|BL_ORD_ID|198356LOC_Os11g12360.1 Oryza sativa subsp. japonica|M-type_MADS|M-type_MADS family protein	198356	2.48206e-20	61.2245	93.2041	98	60
TRINITY_DN445802_c0_g5_i1	B3	230	gnl|BL_ORD_ID|269643Sopen03g007470.1 Solanum pennellii|B3|B3 family protein	269643	2.46312e-11	45.9459	62.003	74	34
TRINITY_DN464785_c6_g6_i1	NAC	338	gnl|BL_ORD_ID|296846TRIUR3_11787-P1 Triticum urartu|NAC|NAC family protein	296846	0.00451888	61.7647	38.1206	34	21
TRINITY_DN468421_c14_g5_i1	B3	273	gnl|BL_ORD_ID|124947MLOC_64376.11 Hordeum vulgare|B3|B3 family protein	124947	4.94823e-09	49.3827	53.9138	81	40
TRINITY_DN468719_c12_g4_i4	FAR1	277	gnl|BL_ORD_ID|199065LOC_Os04g22990.1 Oryza sativa subsp. japonica|FAR1|FAR1 family protein	199065	0.00237421	48.3871	38.891	93	45
TRINITY_DN474764_c4_g6_i3	WRKY	332	gnl|BL_ORD_ID|296164TRIUR3_24639-P1 Triticum urartu|WRKY|WRKY family protein	296164	1.28238e-13	67.0213	68.9366	94	63
TRINITY_DN476529_c8_g4_i2	B3	280	gnl|BL_ORD_ID|20166EMT01685 Aegilops tauschii|B3|B3 family protein	20166	2.6258e-05	44.7917	45.0542	96	43
TRINITY_DN477091_c14_g2_i1	MYB	268	gnl|BL_ORD_ID|20187EMT20255 Aegilops tauschii|MYB|MYB family protein	20187	2.00394e-19	79.661	83.5741	59	47
TRINITY_DN487037_c5_g1_i2	NAC	222	gnl|BL_ORD_ID|296846TRIUR3_11787-P1 Triticum urartu|NAC|NAC family protein	296846	9.67657e-10	66.6667	56.9954	57	38
TRINITY_DN490229_c9_g5_i2	ZF-HD	218	gnl|BL_ORD_ID|269698Sopen05g016700.1 Solanum pennellii|ZF-HD|ZF-HD family protein	269698	0.000907874	57.4074	39.6614	54	31
TRINITY_DN496684_c11_g4_i1	MYB	239	gnl|BL_ORD_ID|20187EMT20255 Aegilops tauschii|MYB|MYB family protein	20187	1.3468e-06	79.4118	47.7506	34	27
TRINITY_DN505465_c6_g4_i1	M-type_MADS	227	gnl|BL_ORD_ID|198356LOC_Os11g12360.1 Oryza sativa subsp. japonica|M-type_MADS|M-type_MADS family protein	198356	1.77836e-05	61.2245	45.0542	49	30
TRINITY_DN523486_c86_g1_i1	ZF-HD	218	gnl|BL_ORD_ID|269698Sopen05g016700.1 Solanum pennellii|ZF-HD|ZF-HD family protein	269698	2.46466e-06	60.3774	47.7506	53	32
TRINITY_DN523759_c16_g5_i3	TCP	452	gnl|BL_ORD_ID|270237Sopen12g015990.1 Solanum pennellii|TCP|TCP family protein	270237	2.12916e-07	37.7622	52.7582	143	54
TRINITY_DN384226_c2_g1_i6	bHLH	269	gnl|BL_ORD_ID|296394TRIUR3_31817-P1 Triticum urartu|bHLH|bHLH family protein	296394	6.70785e-19	89.5833	82.4185	48	43
TRINITY_DN489673_c11_g7_i3	bHLH	294	gnl|BL_ORD_ID|297244TRIUR3_29035-P1 Triticum urartu|bHLH|bHLH family protein	297244	5.24833e-16	81.4286	75.485	70	57
TRINITY_DN464785_c6_g6_i3	NAC	216	gnl|BL_ORD_ID|296846TRIUR3_11787-P1 Triticum urartu|NAC|NAC family protein	296846	3.93364e-07	66.6667	49.2914	39	26
TRINITY_DN455931_c7_g3_i3	LBD	203	gnl|BL_ORD_ID|269669Sopen05g028040.1 Solanum pennellii|LBD|LBD family protein	269669	2.3546e-14	73.1343	70.8626	67	49
TRINITY_DN515317_c36_g10_i5	NAC	209	gnl|BL_ORD_ID|20708EMT33859 Aegilops tauschii|NAC|NAC family protein	20708	0.000562003	57.7778	40.0466	45	26
TRINITY_DN522088_c118_g2_i5	FAR1	3440	gnl|BL_ORD_ID|199065LOC_Os04g22990.1 Oryza sativa subsp. japonica|FAR1|FAR1 family protein	199065	6.73548e-146	56.6319	489.189	671	380
TRINITY_DN253483_c2_g1_i1	ZF-HD	248	gnl|BL_ORD_ID|269698Sopen05g016700.1 Solanum pennellii|ZF-HD|ZF-HD family protein	269698	2.86472e-10	69.2308	59.6918	52	36
TRINITY_DN286131_c2_g1_i1	bHLH	236	gnl|BL_ORD_ID|296394TRIUR3_31817-P1 Triticum urartu|bHLH|bHLH family protein	296394	1.48349e-17	92.6829	78.1814	41	38
TRINITY_DN324094_c2_g1_i1	NAC	225	gnl|BL_ORD_ID|128048Itr_sc004419.1_g00003.1 Ipomoea trifida|NAC|NAC family protein	128048	3.3363e-10	61.8421	59.3066	76	47
TRINITY_DN343256_c1_g1_i2	NAC	223	gnl|BL_ORD_ID|306416Zjn_sc00005.1.g03670.1.sm.mkhc Zoysia japonica|NAC|NAC family protein	306416	4.56605e-26	75	102.064	72	54
TRINITY_DN453475_c1_g5_i1	TCP	255	gnl|BL_ORD_ID|270237Sopen12g015990.1 Solanum pennellii|TCP|TCP family protein	270237	9.71926e-37	82.1429	136.346	84	69
TRINITY_DN453475_c1_g5_i4	TCP	226	gnl|BL_ORD_ID|270237Sopen12g015990.1 Solanum pennellii|TCP|TCP family protein	270237	3.69898e-30	79.4521	117.087	73	58
TRINITY_DN459017_c10_g3_i15	FAR1	355	gnl|BL_ORD_ID|199065LOC_Os04g22990.1 Oryza sativa subsp. japonica|FAR1|FAR1 family protein	199065	4.71533e-05	54.5455	33.113	44	24
TRINITY_DN460266_c0_g1_i1	NAC	231	gnl|BL_ORD_ID|296846TRIUR3_11787-P1 Triticum urartu|NAC|NAC family protein	296846	4.49218e-05	50.8475	43.5134	59	30
TRINITY_DN464384_c13_g3_i1	NAC	252	gnl|BL_ORD_ID|296846TRIUR3_11787-P1 Triticum urartu|NAC|NAC family protein	296846	5.08045e-08	85.2941	52.373	34	29
TRINITY_DN468415_c2_g1_i1	FAR1	229	gnl|BL_ORD_ID|81473Dca46628.1 Dianthus caryophyllus|FAR1|FAR1 family protein	81473	2.25362e-14	68.4932	69.3218	73	50
TRINITY_DN469224_c4_g1_i1	B3	268	gnl|BL_ORD_ID|269643Sopen03g007470.1 Solanum pennellii|B3|B3 family protein	269643	2.21671e-05	46.2963	45.0542	54	25
TRINITY_DN471383_c4_g15_i1	NAC	295	gnl|BL_ORD_ID|128048Itr_sc004419.1_g00003.1 Ipomoea trifida|NAC|NAC family protein	128048	5.74712e-38	78.3505	140.584	97	76
TRINITY_DN479786_c10_g2_i1	NAC	209	gnl|BL_ORD_ID|128048Itr_sc004419.1_g00003.1 Ipomoea trifida|NAC|NAC family protein	128048	4.46418e-08	62.2642	52.7582	53	33
TRINITY_DN495326_c11_g1_i1	FAR1	290	gnl|BL_ORD_ID|199065LOC_Os04g22990.1 Oryza sativa subsp. japonica|FAR1|FAR1 family protein	199065	7.95875e-11	61.0169	61.6178	59	36
TRINITY_DN496005_c7_g2_i1	FAR1	207	gnl|BL_ORD_ID|81473Dca46628.1 Dianthus caryophyllus|FAR1|FAR1 family protein	81473	3.58775e-12	67.6471	62.7734	68	46
TRINITY_DN513738_c50_g4_i1	HB-other	287	gnl|BL_ORD_ID|22349AT4G02560.2 Arabidopsis thaliana|HB-other|HB-other family protein	22349	0.000123268	63.2653	42.743	49	31
TRINITY_DN404337_c1_g4_i1	NF-YB	259	gnl|BL_ORD_ID|128119Itr_sc000950.1_g00003.1 Ipomoea trifida|NF-YB|NF-YB family protein	128119	2.46353e-08	60.2941	53.9138	68	41
TRINITY_DN523234_c15_g3_i7	HB-PHD	1022	gnl|BL_ORD_ID|20988EMT18532 Aegilops tauschii|HB-PHD|HB-PHD family protein	20988	7.52541e-18	74.359	87.4261	78	58
TRINITY_DN417295_c0_g1_i3	bHLH	211	gnl|BL_ORD_ID|270194Sopen12g030120.1 Solanum pennellii|bHLH|bHLH family protein	270194	1.73522e-30	85.7143	117.472	70	60
TRINITY_DN469768_c2_g1_i1	ERF	286	gnl|BL_ORD_ID|291652XP_010556248.1 Tarenaya hassleriana|ERF|ERF family protein	291652	3.93581e-11	63.6364	62.3882	77	49
TRINITY_DN467779_c1_g1_i2	M-type_MADS	420	gnl|BL_ORD_ID|198356LOC_Os11g12360.1 Oryza sativa subsp. japonica|M-type_MADS|M-type_MADS family protein	198356	2.09821e-05	44.0299	46.2098	134	59
TRINITY_DN500504_c4_g3_i3	NF-YA	349	gnl|BL_ORD_ID|269338Sopen02g006770.1 Solanum pennellii|NF-YA|NF-YA family protein	269338	0.000477902	54.6667	41.5874	75	41
TRINITY_DN513738_c50_g15_i2	HB-other	395	gnl|BL_ORD_ID|22349AT4G02560.2 Arabidopsis thaliana|HB-other|HB-other family protein	22349	9.28142e-08	60.2941	53.1434	68	41
TRINITY_DN520191_c12_g7_i5	TCP	366	gnl|BL_ORD_ID|270237Sopen12g015990.1 Solanum pennellii|TCP|TCP family protein	270237	2.4644e-50	80.6723	177.178	119	96
TRINITY_DN481989_c3_g8_i1	GRAS	223	gnl|BL_ORD_ID|250654Rsa1.0_01791.1_g00001.1 Raphanus sativus|GRAS|GRAS family protein	250654	7.78341e-09	63.1579	55.0694	57	36
TRINITY_DN187374_c0_g1_i1	G2-like	217	gnl|BL_ORD_ID|269967Sopen02g025440.1 Solanum pennellii|G2-like|G2-like family protein	269967	1.33102e-06	62.963	48.1358	54	34
TRINITY_DN256538_c0_g1_i1	FAR1	214	gnl|BL_ORD_ID|199065LOC_Os04g22990.1 Oryza sativa subsp. japonica|FAR1|FAR1 family protein	199065	1.22615e-16	71.4286	77.7962	70	50
TRINITY_DN298518_c0_g1_i1	B3	251	gnl|BL_ORD_ID|20166EMT01685 Aegilops tauschii|B3|B3 family protein	20166	5.01688e-05	62.7907	43.8986	43	27
TRINITY_DN470634_c2_g6_i2	FAR1	280	gnl|BL_ORD_ID|199065LOC_Os04g22990.1 Oryza sativa subsp. japonica|FAR1|FAR1 family protein	199065	2.94618e-13	63.2184	68.9366	87	55
TRINITY_DN494750_c8_g1_i2	NAC	243	gnl|BL_ORD_ID|296846TRIUR3_11787-P1 Triticum urartu|NAC|NAC family protein	296846	7.68606e-12	61.039	63.1586	77	47
TRINITY_DN512364_c8_g1_i10	C2H2	267	gnl|BL_ORD_ID|297126TRIUR3_34542-P1 Triticum urartu|C2H2|C2H2 family protein	297126	3.11008e-11	86.8421	62.003	38	33
TRINITY_DN466861_c5_g4_i1	NAC	223	gnl|BL_ORD_ID|128048Itr_sc004419.1_g00003.1 Ipomoea trifida|NAC|NAC family protein	128048	7.50942e-24	75.6757	98.5969	74	56
TRINITY_DN493866_c5_g6_i1	FAR1	292	gnl|BL_ORD_ID|199065LOC_Os04g22990.1 Oryza sativa subsp. japonica|FAR1|FAR1 family protein	199065	0.000158308	53.4884	42.743	86	46
TRINITY_DN519778_c28_g3_i3	M-type_MADS	1057	gnl|BL_ORD_ID|198356LOC_Os11g12360.1 Oryza sativa subsp. japonica|M-type_MADS|M-type_MADS family protein	198356	1.38815e-150	78.7966	473.781	349	275
TRINITY_DN378701_c0_g1_i1	ERF	241	gnl|BL_ORD_ID|129018Jcr4S11523.10 Jatropha curcas|ERF|ERF family protein	129018	0.00142826	55.9322	39.2762	59	33
TRINITY_DN412354_c0_g1_i3	B3	211	gnl|BL_ORD_ID|297270TRIUR3_16915-P1 Triticum urartu|B3|B3 family protein	297270	3.9326e-11	72.3404	61.2326	47	34
TRINITY_DN463886_c2_g4_i1	FAR1	280	gnl|BL_ORD_ID|199065LOC_Os04g22990.1 Oryza sativa subsp. japonica|FAR1|FAR1 family protein	199065	1.30876e-26	68.8172	107.457	93	64
TRINITY_DN468511_c4_g2_i1	FAR1	264	gnl|BL_ORD_ID|199065LOC_Os04g22990.1 Oryza sativa subsp. japonica|FAR1|FAR1 family protein	199065	4.82814e-20	65.1163	88.1965	86	56
TRINITY_DN468969_c8_g2_i2	ERF	297	gnl|BL_ORD_ID|291652XP_010556248.1 Tarenaya hassleriana|ERF|ERF family protein	291652	3.56963e-33	79.0698	126.331	86	68
TRINITY_DN471195_c1_g2_i7	NAC	235	gnl|BL_ORD_ID|296846TRIUR3_11787-P1 Triticum urartu|NAC|NAC family protein	296846	3.26019e-11	80	61.2326	35	28
TRINITY_DN493310_c5_g3_i1	LBD	324	gnl|BL_ORD_ID|319689Zpz_sc02343.1.g00020.1.am.mk Zoysia pacifica|LBD|LBD family protein	319689	0.000754643	46.7391	40.4318	92	43
TRINITY_DN505779_c8_g1_i1	NAC	245	gnl|BL_ORD_ID|296846TRIUR3_11787-P1 Triticum urartu|NAC|NAC family protein	296846	7.22096e-22	88.2353	91.2781	51	45
TRINITY_DN433622_c0_g1_i1	FAR1	259	gnl|BL_ORD_ID|82637Dca43462.1 Dianthus caryophyllus|FAR1|FAR1 family protein	82637	0.0190061	46.3768	35.8094	69	32
TRINITY_DN523467_c37_g8_i1	TCP	706	gnl|BL_ORD_ID|270237Sopen12g015990.1 Solanum pennellii|TCP|TCP family protein	270237	1.63606e-103	82.4324	335.109	222	183
TRINITY_DN391794_c0_g1_i1	G2-like	223	gnl|BL_ORD_ID|269678Sopen11g010100.1 Solanum pennellii|G2-like|G2-like family protein	269678	0.00336218	68.5714	37.7354	35	24
TRINITY_DN492736_c3_g1_i8	HD-ZIP	307	gnl|BL_ORD_ID|216651PH01000183G0940 Phyllostachys heterocycla|HD-ZIP|HD-ZIP family protein	216651	0.00227084	44.4444	38.891	81	36
TRINITY_DN519880_c4_g2_i1	bHLH	220	gnl|BL_ORD_ID|295285Tp57577_TGAC_v2_mRNA34811 Trifolium pratense|bHLH|bHLH family protein	295285	3.98733e-16	65.6716	75.8702	67	44
TRINITY_DN468108_c1_g3_i1	M-type_MADS	212	gnl|BL_ORD_ID|198356LOC_Os11g12360.1 Oryza sativa subsp. japonica|M-type_MADS|M-type_MADS family protein	198356	1.19364e-08	55.3571	46.595	56	31
TRINITY_DN440032_c0_g2_i1	ZF-HD	313	gnl|BL_ORD_ID|269698Sopen05g016700.1 Solanum pennellii|ZF-HD|ZF-HD family protein	269698	1.66304e-15	59.7826	75.8702	92	55
TRINITY_DN467593_c57_g1_i2	FAR1	321	gnl|BL_ORD_ID|199065LOC_Os04g22990.1 Oryza sativa subsp. japonica|FAR1|FAR1 family protein	199065	0.0145691	57.5	36.5798	40	23
TRINITY_DN468342_c6_g4_i1	ERF	217	gnl|BL_ORD_ID|291652XP_010556248.1 Tarenaya hassleriana|ERF|ERF family protein	291652	1.83452e-17	85.4545	80.1073	55	47
TRINITY_DN475198_c17_g4_i2	FAR1	323	gnl|BL_ORD_ID|199065LOC_Os04g22990.1 Oryza sativa subsp. japonica|FAR1|FAR1 family protein	199065	4.48907e-14	52.7473	71.633	91	48
TRINITY_DN476141_c1_g2_i2	MYB	227	gnl|BL_ORD_ID|20187EMT20255 Aegilops tauschii|MYB|MYB family protein	20187	2.681e-18	62.1622	80.1073	74	46
TRINITY_DN481480_c8_g1_i1	G2-like	325	gnl|BL_ORD_ID|269678Sopen11g010100.1 Solanum pennellii|G2-like|G2-like family protein	269678	0.0145947	55.3846	36.5798	65	36
TRINITY_DN496005_c6_g2_i2	TCP	302	gnl|BL_ORD_ID|270237Sopen12g015990.1 Solanum pennellii|TCP|TCP family protein	270237	2.08506e-06	62.7907	48.521	86	54
TRINITY_DN520454_c26_g10_i7	B3	271	gnl|BL_ORD_ID|305015Zjn_sc00019.1.g02220.1.sm.mkhc Zoysia japonica|B3|B3 family protein	305015	0.00208141	51.8519	38.891	54	28
TRINITY_DN521381_c7_g4_i1	TCP	402	gnl|BL_ORD_ID|270237Sopen12g015990.1 Solanum pennellii|TCP|TCP family protein	270237	4.67107e-15	48.2517	75.485	143	69
TRINITY_DN98210_c0_g1_i1	C3H	383	gnl|BL_ORD_ID|21328EMT14529 Aegilops tauschii|C3H|C3H family protein	21328	0.00751766	70.2703	37.7354	37	26
TRINITY_DN522198_c16_g9_i4	M-type_MADS	983	gnl|BL_ORD_ID|198356LOC_Os11g12360.1 Oryza sativa subsp. japonica|M-type_MADS|M-type_MADS family protein	198356	2.46434e-24	50	108.612	248	124
TRINITY_DN354656_c0_g1_i1	M-type_MADS	244	gnl|BL_ORD_ID|269835Sopen04g024410.1 Solanum pennellii|M-type_MADS|M-type_MADS family protein	269835	1.19814e-05	59.322	45.0542	59	35
TRINITY_DN523486_c91_g6_i3	NAC	303	gnl|BL_ORD_ID|128048Itr_sc004419.1_g00003.1 Ipomoea trifida|NAC|NAC family protein	128048	9.24846e-11	52.1277	61.6178	94	49
TRINITY_DN500023_c66_g19_i3	ZF-HD	1163	gnl|BL_ORD_ID|269698Sopen05g016700.1 Solanum pennellii|ZF-HD|ZF-HD family protein	269698	6.48558e-157	77.6596	494.967	376	292
TRINITY_DN523883_c15_g7_i1	FAR1	256	gnl|BL_ORD_ID|81473Dca46628.1 Dianthus caryophyllus|FAR1|FAR1 family protein	81473	2.05425e-24	78.9474	97.0561	76	60
TRINITY_DN267525_c0_g2_i1	MYB	276	gnl|BL_ORD_ID|20187EMT20255 Aegilops tauschii|MYB|MYB family protein	20187	3.47043e-18	79.2453	80.4925	53	42
TRINITY_DN401171_c0_g1_i1	NAC	222	gnl|BL_ORD_ID|296846TRIUR3_11787-P1 Triticum urartu|NAC|NAC family protein	296846	8.12367e-32	94.8276	118.242	58	55
TRINITY_DN435915_c4_g1_i1	ZF-HD	221	gnl|BL_ORD_ID|269698Sopen05g016700.1 Solanum pennellii|ZF-HD|ZF-HD family protein	269698	0.00943651	52.1127	36.5798	71	37
TRINITY_DN451689_c5_g1_i1	NAC	201	gnl|BL_ORD_ID|128048Itr_sc004419.1_g00003.1 Ipomoea trifida|NAC|NAC family protein	128048	3.74625e-09	59.6774	55.8398	62	37
TRINITY_DN479009_c21_g3_i11	HD-ZIP	252	gnl|BL_ORD_ID|216651PH01000183G0940 Phyllostachys heterocycla|HD-ZIP|HD-ZIP family protein	216651	0.000427381	51.5152	40.817	66	34
TRINITY_DN479036_c3_g5_i1	WRKY	321	gnl|BL_ORD_ID|297335TRIUR3_28409-P1 Triticum urartu|WRKY|WRKY family protein	297335	0.000797795	68.4211	40.0466	38	26
TRINITY_DN500391_c9_g1_i1	B3	225	gnl|BL_ORD_ID|20556EMT22877 Aegilops tauschii|B3|B3 family protein	20556	1.02652e-05	60.4651	44.2838	43	26
TRINITY_DN504919_c3_g2_i1	M-type_MADS	235	gnl|BL_ORD_ID|198356LOC_Os11g12360.1 Oryza sativa subsp. japonica|M-type_MADS|M-type_MADS family protein	198356	4.16082e-17	74.5455	74.3294	55	41
TRINITY_DN521381_c7_g8_i2	NAC	276	gnl|BL_ORD_ID|217455PH01000143G0710 Phyllostachys heterocycla|NAC|NAC family protein	217455	0.0198296	48.0769	35.8094	52	25
TRINITY_DN474002_c5_g1_i1	HD-ZIP	339	gnl|BL_ORD_ID|82545Dca2137.1 Dianthus caryophyllus|HD-ZIP|HD-ZIP family protein	82545	2.95631e-55	90.2655	187.578	113	102
TRINITY_DN466166_c3_g1_i1	ZF-HD	300	gnl|BL_ORD_ID|269698Sopen05g016700.1 Solanum pennellii|ZF-HD|ZF-HD family protein	269698	9.9583e-42	82.4742	151.369	97	80
TRINITY_DN105816_c1_g1_i3	MYB	307	gnl|BL_ORD_ID|20187EMT20255 Aegilops tauschii|MYB|MYB family protein	20187	7.45969e-46	84.2105	155.992	95	80
TRINITY_DN295209_c1_g1_i1	FAR1	225	gnl|BL_ORD_ID|199065LOC_Os04g22990.1 Oryza sativa subsp. japonica|FAR1|FAR1 family protein	199065	5.27548e-24	74.6269	98.9821	67	50
TRINITY_DN324501_c0_g3_i1	GRAS	239	gnl|BL_ORD_ID|296836TRIUR3_07891-P1 Triticum urartu|GRAS|GRAS family protein	296836	2.95869e-15	78.2051	72.7886	78	61
TRINITY_DN459122_c2_g6_i1	ERF	276	gnl|BL_ORD_ID|20250EMT26591 Aegilops tauschii|ERF|ERF family protein	20250	4.50764e-21	92.0455	86.2705	88	81
TRINITY_DN465380_c5_g1_i1	FAR1	218	gnl|BL_ORD_ID|199065LOC_Os04g22990.1 Oryza sativa subsp. japonica|FAR1|FAR1 family protein	199065	1.3589e-15	65.2778	74.7146	72	47
TRINITY_DN469545_c2_g2_i1	HD-ZIP	255	gnl|BL_ORD_ID|269681Sopen09g021360.1 Solanum pennellii|HD-ZIP|HD-ZIP family protein	269681	4.29616e-23	87.5	97.0561	64	56
TRINITY_DN478553_c2_g7_i6	ERF	341	gnl|BL_ORD_ID|291652XP_010556248.1 Tarenaya hassleriana|ERF|ERF family protein	291652	4.74111e-40	78.7611	146.747	113	89
TRINITY_DN486853_c2_g6_i1	M-type_MADS	212	gnl|BL_ORD_ID|198356LOC_Os11g12360.1 Oryza sativa subsp. japonica|M-type_MADS|M-type_MADS family protein	198356	2.2799e-05	51.5625	44.669	64	33
TRINITY_DN493033_c12_g4_i1	HD-ZIP	327	gnl|BL_ORD_ID|216651PH01000183G0940 Phyllostachys heterocycla|HD-ZIP|HD-ZIP family protein	216651	0.00297338	50.9091	38.891	55	28
TRINITY_DN497434_c1_g6_i2	TCP	271	gnl|BL_ORD_ID|270237Sopen12g015990.1 Solanum pennellii|TCP|TCP family protein	270237	0.00107862	60.4651	40.0466	43	26
TRINITY_DN523746_c143_g1_i1	FAR1	261	gnl|BL_ORD_ID|199065LOC_Os04g22990.1 Oryza sativa subsp. japonica|FAR1|FAR1 family protein	199065	1.24595e-09	52.381	57.7658	84	44
TRINITY_DN853629_c0_g1_i1	M-type_MADS	262	gnl|BL_ORD_ID|198356LOC_Os11g12360.1 Oryza sativa subsp. japonica|M-type_MADS|M-type_MADS family protein	198356	6.18355e-07	77.1429	49.6766	35	27
TRINITY_DN422718_c0_g2_i1	B3	232	gnl|BL_ORD_ID|21154EMT05021 Aegilops tauschii|B3|B3 family protein	21154	2.54197e-07	59.6154	50.0618	52	31
TRINITY_DN474002_c4_g2_i1	HD-ZIP	239	gnl|BL_ORD_ID|82545Dca2137.1 Dianthus caryophyllus|HD-ZIP|HD-ZIP family protein	82545	1.19594e-11	75	63.1586	44	33
TRINITY_DN406777_c0_g1_i2	GRAS	234	gnl|BL_ORD_ID|296836TRIUR3_07891-P1 Triticum urartu|GRAS|GRAS family protein	296836	3.18686e-06	59.0909	46.595	66	39
TRINITY_DN116909_c0_g1_i1	FAR1	218	gnl|BL_ORD_ID|199065LOC_Os04g22990.1 Oryza sativa subsp. japonica|FAR1|FAR1 family protein	199065	4.92903e-29	80.2817	113.62	71	57
TRINITY_DN223813_c0_g1_i1	C2H2	226	gnl|BL_ORD_ID|36461XP_013623881.1 Brassica oleracea|C2H2|C2H2 family protein	36461	0.0040954	61.8182	37.3502	55	34
TRINITY_DN288991_c1_g1_i1	FAR1	284	gnl|BL_ORD_ID|199065LOC_Os04g22990.1 Oryza sativa subsp. japonica|FAR1|FAR1 family protein	199065	1.05613e-06	48.913	49.2914	92	45
TRINITY_DN303497_c0_g1_i1	ZF-HD	208	gnl|BL_ORD_ID|269698Sopen05g016700.1 Solanum pennellii|ZF-HD|ZF-HD family protein	269698	3.15779e-20	77.9412	88.1965	68	53
TRINITY_DN336383_c1_g1_i1	NAC	230	gnl|BL_ORD_ID|296846TRIUR3_11787-P1 Triticum urartu|NAC|NAC family protein	296846	1.0155e-21	85.7143	90.8929	56	48
TRINITY_DN453465_c2_g3_i2	HD-ZIP	228	gnl|BL_ORD_ID|269681Sopen09g021360.1 Solanum pennellii|HD-ZIP|HD-ZIP family protein	269681	1.07349e-30	87.5	118.627	72	63
TRINITY_DN453988_c5_g3_i1	B3	219	gnl|BL_ORD_ID|20166EMT01685 Aegilops tauschii|B3|B3 family protein	20166	0.0159062	47.3684	25.7942	38	18
TRINITY_DN461605_c2_g2_i1	MYB	219	gnl|BL_ORD_ID|20187EMT20255 Aegilops tauschii|MYB|MYB family protein	20187	3.51521e-17	80	77.0258	50	40
TRINITY_DN468662_c2_g2_i3	NF-YC	269	gnl|BL_ORD_ID|308258XP_015888275.1 Ziziphus jujuba|NF-YC|NF-YC family protein	308258	0.0389052	63.8889	34.6538	36	23
TRINITY_DN484876_c8_g10_i1	HD-ZIP	265	gnl|BL_ORD_ID|269681Sopen09g021360.1 Solanum pennellii|HD-ZIP|HD-ZIP family protein	269681	4.68207e-36	83.7209	134.42	86	72
TRINITY_DN496684_c11_g2_i1	MYB	277	gnl|BL_ORD_ID|20187EMT20255 Aegilops tauschii|MYB|MYB family protein	20187	1.65914e-43	86.5169	149.443	89	77
TRINITY_DN519560_c37_g4_i1	ERF	244	gnl|BL_ORD_ID|291652XP_010556248.1 Tarenaya hassleriana|ERF|ERF family protein	291652	9.43006e-32	79.2683	121.324	82	65
TRINITY_DN809850_c0_g1_i1	FAR1	301	gnl|BL_ORD_ID|198590LOC_Os11g12490.1 Oryza sativa subsp. japonica|FAR1|FAR1 family protein	198590	1.08895e-06	50	49.2914	74	37
TRINITY_DN518200_c44_g11_i1	NAC	997	gnl|BL_ORD_ID|84783Do022798.1 Dichanthelium oligosanthes|NAC|NAC family protein	84783	0.00559063	61.7647	39.2762	68	42
TRINITY_DN437300_c7_g3_i1	ZF-HD	343	gnl|BL_ORD_ID|269698Sopen05g016700.1 Solanum pennellii|ZF-HD|ZF-HD family protein	269698	0.0108795	54.902	37.3502	51	28
TRINITY_DN521820_c41_g29_i1	Nin-like	218	gnl|BL_ORD_ID|311924GRMZM2G472589_P01 Zea mays|Nin-like|Nin-like family protein	311924	0.030704	56.8182	34.6538	44	25
TRINITY_DN467582_c9_g6_i1	TCP	206	gnl|BL_ORD_ID|270237Sopen12g015990.1 Solanum pennellii|TCP|TCP family protein	270237	5.18451e-24	78.4615	98.9821	65	51
TRINITY_DN467392_c6_g5_i1	LBD	275	gnl|BL_ORD_ID|269669Sopen05g028040.1 Solanum pennellii|LBD|LBD family protein	269669	0.0152249	55.8824	36.1946	68	38
TRINITY_DN523746_c143_g3_i1	FAR1	579	gnl|BL_ORD_ID|199065LOC_Os04g22990.1 Oryza sativa subsp. japonica|FAR1|FAR1 family protein	199065	3.99348e-69	72.3958	234.572	192	139
TRINITY_DN471685_c9_g9_i1	M-type_MADS	209	gnl|BL_ORD_ID|269835Sopen04g024410.1 Solanum pennellii|M-type_MADS|M-type_MADS family protein	269835	2.56287e-06	61.0169	46.9802	59	36
TRINITY_DN411784_c0_g1_i1	B3	201	gnl|BL_ORD_ID|270192Sopen00g003940.1 Solanum pennellii|B3|B3 family protein	270192	0.0019849	53.125	38.5058	64	34
TRINITY_DN415023_c0_g2_i1	G2-like	254	gnl|BL_ORD_ID|269678Sopen11g010100.1 Solanum pennellii|G2-like|G2-like family protein	269678	8.76132e-08	53.4884	51.9878	86	46
TRINITY_DN464861_c5_g5_i1	HD-ZIP	219	gnl|BL_ORD_ID|269681Sopen09g021360.1 Solanum pennellii|HD-ZIP|HD-ZIP family protein	269681	1.15173e-23	79.4118	98.2117	68	54
TRINITY_DN469541_c40_g3_i3	FAR1	226	gnl|BL_ORD_ID|240097Pavir.9NG065900.1.p Panicum virgatum|FAR1|FAR1 family protein	240097	0.0354915	41.791	34.6538	67	28
TRINITY_DN469545_c1_g6_i1	ERF	225	gnl|BL_ORD_ID|291652XP_010556248.1 Tarenaya hassleriana|ERF|ERF family protein	291652	8.77741e-11	72.7273	60.8474	55	40
TRINITY_DN473344_c2_g1_i3	MYB	222	gnl|BL_ORD_ID|20187EMT20255 Aegilops tauschii|MYB|MYB family protein	20187	1.25158e-34	83.5616	124.79	73	61
TRINITY_DN486801_c5_g3_i5	FAR1	231	gnl|BL_ORD_ID|199065LOC_Os04g22990.1 Oryza sativa subsp. japonica|FAR1|FAR1 family protein	199065	1.32782e-15	61.3333	75.0998	75	46
TRINITY_DN523759_c15_g2_i1	TCP	203	gnl|BL_ORD_ID|270237Sopen12g015990.1 Solanum pennellii|TCP|TCP family protein	270237	1.41535e-26	86.5672	106.301	67	58
TRINITY_DN521689_c8_g2_i7	HD-ZIP	295	gnl|BL_ORD_ID|269681Sopen09g021360.1 Solanum pennellii|HD-ZIP|HD-ZIP family protein	269681	5.9109e-37	81.4433	137.502	97	79
TRINITY_DN522133_c34_g1_i1	TCP	995	gnl|BL_ORD_ID|270237Sopen12g015990.1 Solanum pennellii|TCP|TCP family protein	270237	1.80407e-21	42.9775	99.3673	356	153
TRINITY_DN459083_c1_g2_i1	FAR1	261	gnl|BL_ORD_ID|82637Dca43462.1 Dianthus caryophyllus|FAR1|FAR1 family protein	82637	4.7989e-05	49.2754	43.8986	69	34
TRINITY_DN1205_c0_g1_i1	ZF-HD	262	gnl|BL_ORD_ID|269698Sopen05g016700.1 Solanum pennellii|ZF-HD|ZF-HD family protein	269698	0.000142631	49.3333	42.743	75	37
TRINITY_DN451125_c7_g2_i2	NAC	224	gnl|BL_ORD_ID|128048Itr_sc004419.1_g00003.1 Ipomoea trifida|NAC|NAC family protein	128048	4.70495e-08	60.8108	52.7582	74	45
TRINITY_DN452969_c1_g1_i1	B3	212	gnl|BL_ORD_ID|20566EMT28125 Aegilops tauschii|B3|B3 family protein	20566	1.38724e-09	84.6154	56.6102	39	33
TRINITY_DN476635_c26_g2_i1	bHLH	208	gnl|BL_ORD_ID|296394TRIUR3_31817-P1 Triticum urartu|bHLH|bHLH family protein	296394	2.07357e-17	87.5	77.411	48	42
TRINITY_DN488920_c3_g14_i1	NAC	217	gnl|BL_ORD_ID|20269EMT14186 Aegilops tauschii|NAC|NAC family protein	20269	1.62232e-11	89.4737	59.6918	38	34
TRINITY_DN489248_c12_g5_i1	AP2	345	gnl|BL_ORD_ID|209331PDK_30s782571g001 Phoenix dactylifera|AP2|AP2 family protein	209331	0.0484943	41.1765	35.4242	85	35
TRINITY_DN502385_c35_g6_i1	B3	418	gnl|BL_ORD_ID|269643Sopen03g007470.1 Solanum pennellii|B3|B3 family protein	269643	1.48794e-17	46.4912	82.4185	114	53
TRINITY_DN520670_c15_g2_i1	C2H2	208	gnl|BL_ORD_ID|297126TRIUR3_34542-P1 Triticum urartu|C2H2|C2H2 family protein	297126	3.86258e-20	90	85.8853	50	45
TRINITY_DN523467_c37_g3_i4	TCP	223	gnl|BL_ORD_ID|270237Sopen12g015990.1 Solanum pennellii|TCP|TCP family protein	270237	0.0313189	61.1111	35.039	36	22
TRINITY_DN523759_c16_g1_i1	TCP	590	gnl|BL_ORD_ID|270237Sopen12g015990.1 Solanum pennellii|TCP|TCP family protein	270237	3.5043e-44	63.4146	162.925	205	130
TRINITY_DN523813_c72_g2_i1	ZF-HD	205	gnl|BL_ORD_ID|269698Sopen05g016700.1 Solanum pennellii|ZF-HD|ZF-HD family protein	269698	6.71004e-12	66.1765	63.929	68	45
TRINITY_DN503839_c0_g2_i1	ZF-HD	223	gnl|BL_ORD_ID|269698Sopen05g016700.1 Solanum pennellii|ZF-HD|ZF-HD family protein	269698	2.72886e-15	63.0137	73.9442	73	46
TRINITY_DN523486_c91_g5_i2	NAC	707	gnl|BL_ORD_ID|128048Itr_sc004419.1_g00003.1 Ipomoea trifida|NAC|NAC family protein	128048	5.33055e-27	57.2289	114.39	166	95
TRINITY_DN519778_c26_g3_i1	M-type_MADS	371	gnl|BL_ORD_ID|198356LOC_Os11g12360.1 Oryza sativa subsp. japonica|M-type_MADS|M-type_MADS family protein	198356	4.66528e-38	72.3577	142.124	123	89
TRINITY_DN519628_c12_g11_i3	M-type_MADS	728	gnl|BL_ORD_ID|198356LOC_Os11g12360.1 Oryza sativa subsp. japonica|M-type_MADS|M-type_MADS family protein	198356	1.51736e-25	54.8077	110.153	208	114
TRINITY_DN522619_c27_g4_i1	M-type_MADS	727	gnl|BL_ORD_ID|198356LOC_Os11g12360.1 Oryza sativa subsp. japonica|M-type_MADS|M-type_MADS family protein	198356	9.97424e-07	42.4419	52.373	172	73
TRINITY_DN339530_c2_g4_i1	ZF-HD	214	gnl|BL_ORD_ID|269698Sopen05g016700.1 Solanum pennellii|ZF-HD|ZF-HD family protein	269698	5.11226e-06	55	46.595	60	33
TRINITY_DN465484_c17_g5_i1	NAC	216	gnl|BL_ORD_ID|128048Itr_sc004419.1_g00003.1 Ipomoea trifida|NAC|NAC family protein	128048	3.06736e-09	60.6557	56.225	61	37
TRINITY_DN472015_c2_g4_i4	B3	290	gnl|BL_ORD_ID|270192Sopen00g003940.1 Solanum pennellii|B3|B3 family protein	270192	1.31945e-08	59.4595	55.0694	74	44
TRINITY_DN473854_c4_g3_i9	FAR1	272	gnl|BL_ORD_ID|199065LOC_Os04g22990.1 Oryza sativa subsp. japonica|FAR1|FAR1 family protein	199065	4.05686e-09	56.6667	56.6102	90	51
TRINITY_DN485455_c31_g7_i1	FAR1	380	gnl|BL_ORD_ID|199065LOC_Os04g22990.1 Oryza sativa subsp. japonica|FAR1|FAR1 family protein	199065	1.45062e-11	51.2821	65.0846	117	60
TRINITY_DN484495_c2_g1_i1	Nin-like	226	gnl|BL_ORD_ID|126904Itr_sc000560.1_g00013.1 Ipomoea trifida|Nin-like|Nin-like family protein	126904	2.29097e-15	74.1935	74.3294	62	46
TRINITY_DN485230_c12_g3_i1	B3	221	gnl|BL_ORD_ID|270192Sopen00g003940.1 Solanum pennellii|B3|B3 family protein	270192	0.00202909	44.898	38.5058	49	22
TRINITY_DN315599_c0_g1_i1	FAR1	265	gnl|BL_ORD_ID|199065LOC_Os04g22990.1 Oryza sativa subsp. japonica|FAR1|FAR1 family protein	199065	2.04092e-19	63.6364	86.6557	88	56
TRINITY_DN462634_c11_g2_i3	G2-like	290	gnl|BL_ORD_ID|296938TRIUR3_23402-P1 Triticum urartu|G2-like|G2-like family protein	296938	0.0085654	56.5217	36.965	46	26
TRINITY_DN463694_c1_g1_i1	M-type_MADS	209	gnl|BL_ORD_ID|198356LOC_Os11g12360.1 Oryza sativa subsp. japonica|M-type_MADS|M-type_MADS family protein	198356	9.37214e-24	79.7101	98.2117	69	55
TRINITY_DN466356_c1_g7_i1	NAC	247	gnl|BL_ORD_ID|296846TRIUR3_11787-P1 Triticum urartu|NAC|NAC family protein	296846	0.00104642	47.6923	39.2762	65	31
TRINITY_DN468969_c7_g3_i1	ERF	228	gnl|BL_ORD_ID|291652XP_010556248.1 Tarenaya hassleriana|ERF|ERF family protein	291652	3.82514e-30	81.5789	116.701	76	62
TRINITY_DN473032_c10_g5_i3	B3	254	gnl|BL_ORD_ID|270192Sopen00g003940.1 Solanum pennellii|B3|B3 family protein	270192	0.0469683	60.3448	34.6538	58	35
TRINITY_DN480548_c9_g1_i1	B3	243	gnl|BL_ORD_ID|20166EMT01685 Aegilops tauschii|B3|B3 family protein	20166	0.00259915	60.9756	38.5058	41	25
TRINITY_DN480694_c24_g2_i2	C2H2	207	gnl|BL_ORD_ID|297126TRIUR3_34542-P1 Triticum urartu|C2H2|C2H2 family protein	297126	1.8379e-15	93.4426	73.1738	61	57
TRINITY_DN481131_c4_g2_i1	GRAS	261	gnl|BL_ORD_ID|297329TRIUR3_22881-P1 Triticum urartu|GRAS|GRAS family protein	297329	1.91464e-25	80.4598	103.219	87	70
TRINITY_DN484876_c8_g9_i1	HD-ZIP	323	gnl|BL_ORD_ID|269681Sopen09g021360.1 Solanum pennellii|HD-ZIP|HD-ZIP family protein	269681	5.5028e-52	87.7358	181.415	106	93
TRINITY_DN504236_c38_g9_i6	FAR1	272	gnl|BL_ORD_ID|199065LOC_Os04g22990.1 Oryza sativa subsp. japonica|FAR1|FAR1 family protein	199065	6.35326e-10	54.4444	58.9214	90	49
TRINITY_DN504505_c3_g5_i1	MYB	217	gnl|BL_ORD_ID|270694Sopen09g018670.1 Solanum pennellii|MYB|MYB family protein	270694	0.0276825	58.8235	34.6538	51	30
TRINITY_DN402473_c0_g5_i1	bZIP	209	gnl|BL_ORD_ID|197506LOC_Os12g06010.1 Oryza sativa subsp. japonica|bZIP|bZIP family protein	197506	5.16797e-06	61.7021	46.595	47	29
TRINITY_DN472340_c3_g13_i1	NF-YC	270	gnl|BL_ORD_ID|263673Sme2.5_00529.1_g00001.1 Solanum melongena|NF-YC|NF-YC family protein	263673	0.0186205	63.6364	35.8094	44	28
TRINITY_DN512167_c31_g8_i2	M-type_MADS	1049	gnl|BL_ORD_ID|198356LOC_Os11g12360.1 Oryza sativa subsp. japonica|M-type_MADS|M-type_MADS family protein	198356	6.80012e-60	59.854	214.542	274	164
TRINITY_DN458991_c0_g1_i2	HD-ZIP	202	gnl|BL_ORD_ID|269681Sopen09g021360.1 Solanum pennellii|HD-ZIP|HD-ZIP family protein	269681	0.000420613	65	40.4318	40	26
TRINITY_DN517165_c133_g1_i3	AP2	741	gnl|BL_ORD_ID|209331PDK_30s782571g001 Phoenix dactylifera|AP2|AP2 family protein	209331	0.0273977	45.3125	38.891	128	58
TRINITY_DN214171_c0_g1_i1	ZF-HD	213	gnl|BL_ORD_ID|269698Sopen05g016700.1 Solanum pennellii|ZF-HD|ZF-HD family protein	269698	7.18397e-08	58.3333	51.9878	60	35
TRINITY_DN477537_c0_g2_i1	TCP	221	gnl|BL_ORD_ID|311705GRMZM2G414114_P01 Zea mays|TCP|TCP family protein	311705	0.00461761	44.7761	36.965	67	30
TRINITY_DN489113_c10_g1_i2	NAC	296	gnl|BL_ORD_ID|128048Itr_sc004419.1_g00003.1 Ipomoea trifida|NAC|NAC family protein	128048	0.00144627	55.3571	39.6614	56	31
TRINITY_DN491070_c10_g2_i1	FAR1	230	gnl|BL_ORD_ID|199065LOC_Os04g22990.1 Oryza sativa subsp. japonica|FAR1|FAR1 family protein	199065	3.60174e-21	71.6216	90.8929	74	53
TRINITY_DN491812_c2_g1_i1	M-type_MADS	278	gnl|BL_ORD_ID|198356LOC_Os11g12360.1 Oryza sativa subsp. japonica|M-type_MADS|M-type_MADS family protein	198356	6.28517e-05	54.6875	43.8986	64	35
TRINITY_DN493879_c29_g2_i1	NAC	264	gnl|BL_ORD_ID|296846TRIUR3_11787-P1 Triticum urartu|NAC|NAC family protein	296846	3.15122e-22	95.8333	92.8189	48	46
TRINITY_DN508130_c2_g6_i4	TCP	318	gnl|BL_ORD_ID|270237Sopen12g015990.1 Solanum pennellii|TCP|TCP family protein	270237	3.44899e-05	44	45.0542	125	55
TRINITY_DN512679_c13_g1_i12	M-type_MADS	407	gnl|BL_ORD_ID|269481Sopen06g014360.1 Solanum pennellii|M-type_MADS|M-type_MADS family protein	269481	3.61994e-08	48.5075	54.299	134	65
TRINITY_DN523746_c143_g7_i2	MYB	478	gnl|BL_ORD_ID|20187EMT20255 Aegilops tauschii|MYB|MYB family protein	20187	4.96652e-24	67.7083	99.3673	96	65
TRINITY_DN523486_c94_g9_i5	FAR1	1028	gnl|BL_ORD_ID|199065LOC_Os04g22990.1 Oryza sativa subsp. japonica|FAR1|FAR1 family protein	199065	1.5095e-47	51.6026	178.333	312	161
TRINITY_DN415644_c1_g2_i1	TCP	245	gnl|BL_ORD_ID|270237Sopen12g015990.1 Solanum pennellii|TCP|TCP family protein	270237	3.74385e-10	68.254	59.3066	63	43
TRINITY_DN433061_c0_g1_i7	B3	309	gnl|BL_ORD_ID|270074Sopen03g007470.2 Solanum pennellii|B3|B3 family protein	270074	1.39068e-15	50.5263	75.8702	95	48
TRINITY_DN459095_c1_g7_i1	FAR1	218	gnl|BL_ORD_ID|199065LOC_Os04g22990.1 Oryza sativa subsp. japonica|FAR1|FAR1 family protein	199065	0.000238035	58.3333	41.5874	48	28
TRINITY_DN464711_c25_g1_i1	MYB	226	gnl|BL_ORD_ID|20187EMT20255 Aegilops tauschii|MYB|MYB family protein	20187	3.83185e-28	79.7101	107.457	69	55
TRINITY_DN466861_c7_g2_i3	FAR1	228	gnl|BL_ORD_ID|199065LOC_Os04g22990.1 Oryza sativa subsp. japonica|FAR1|FAR1 family protein	199065	3.17798e-20	70.8333	88.1965	72	51
TRINITY_DN490557_c7_g4_i1	NAC	220	gnl|BL_ORD_ID|128048Itr_sc004419.1_g00003.1 Ipomoea trifida|NAC|NAC family protein	128048	3.41794e-06	59.375	46.9802	64	38
TRINITY_DN499810_c13_g1_i1	MYB	301	gnl|BL_ORD_ID|20477EMT24643 Aegilops tauschii|MYB_related|MYB_related family protein	20477	1.30272e-10	73.913	61.2326	69	51
TRINITY_DN523486_c86_g1_i3	ZF-HD	358	gnl|BL_ORD_ID|269698Sopen05g016700.1 Solanum pennellii|ZF-HD|ZF-HD family protein	269698	1.24462e-10	56.6038	43.8986	53	30
TRINITY_DN20964_c0_g1_i1	LBD	207	gnl|BL_ORD_ID|250519Rsa1.0_02878.1_g00005.1 Raphanus sativus|LBD|LBD family protein	250519	1.34955e-12	67.6923	65.855	65	44
TRINITY_DN523789_c8_g1_i1	C3H	3537	gnl|BL_ORD_ID|195748BGIOSGA023566-PA Oryza sativa subsp. indica|C3H|C3H family protein	195748	7.84538e-62	46.0768	234.958	599	276
TRINITY_DN498129_c2_g12_i1	ZF-HD	205	gnl|BL_ORD_ID|269698Sopen05g016700.1 Solanum pennellii|ZF-HD|ZF-HD family protein	269698	2.40315e-28	88.2353	111.309	68	60
TRINITY_DN435492_c0_g3_i1	GRAS	302	gnl|BL_ORD_ID|297329TRIUR3_22881-P1 Triticum urartu|GRAS|GRAS family protein	297329	7.69449e-28	76	110.538	75	57
TRINITY_DN476206_c7_g7_i1	NAC	208	gnl|BL_ORD_ID|128048Itr_sc004419.1_g00003.1 Ipomoea trifida|NAC|NAC family protein	128048	1.19945e-12	62.5	65.855	64	40
TRINITY_DN496488_c13_g1_i5	bHLH	319	gnl|BL_ORD_ID|79247orange1.1g019617m Citrus sinensis|bHLH|bHLH family protein	79247	0.0108524	51.0204	36.5798	49	25
TRINITY_DN520328_c8_g3_i1	TCP	261	gnl|BL_ORD_ID|270237Sopen12g015990.1 Solanum pennellii|TCP|TCP family protein	270237	9.07967e-33	77.381	125.176	84	65
TRINITY_DN468710_c13_g11_i2	GRAS	694	gnl|BL_ORD_ID|297067TRIUR3_03541-P1 Triticum urartu|GRAS|GRAS family protein	297067	7.10097e-13	76.4706	70.0922	51	39
TRINITY_DN477091_c14_g7_i1	MYB	604	gnl|BL_ORD_ID|20187EMT20255 Aegilops tauschii|MYB|MYB family protein	20187	8.11407e-36	78.3505	133.265	97	76
TRINITY_DN455931_c7_g2_i1	ERF	229	gnl|BL_ORD_ID|270781Sopen11g017580.1 Solanum pennellii|ERF|ERF family protein	270781	1.20602e-12	69.0141	66.2402	71	49
TRINITY_DN455931_c7_g6_i8	ERF	292	gnl|BL_ORD_ID|270781Sopen11g017580.1 Solanum pennellii|ERF|ERF family protein	270781	4.99526e-21	65.9574	91.2781	94	62
TRINITY_DN286131_c2_g2_i1	NAC	204	gnl|BL_ORD_ID|296846TRIUR3_11787-P1 Triticum urartu|NAC|NAC family protein	296846	8.61926e-12	78.5714	62.7734	42	33
TRINITY_DN381977_c0_g1_i2	FAR1	204	gnl|BL_ORD_ID|199065LOC_Os04g22990.1 Oryza sativa subsp. japonica|FAR1|FAR1 family protein	199065	0.000967957	51.7857	39.6614	56	29
TRINITY_DN459095_c1_g4_i2	FAR1	228	gnl|BL_ORD_ID|199065LOC_Os04g22990.1 Oryza sativa subsp. japonica|FAR1|FAR1 family protein	199065	1.20264e-08	58.4615	54.6842	65	38
TRINITY_DN466904_c3_g3_i1	NAC	206	gnl|BL_ORD_ID|296846TRIUR3_11787-P1 Triticum urartu|NAC|NAC family protein	296846	1.26893e-07	65.3061	50.8322	49	32
TRINITY_DN483877_c6_g4_i4	NAC	294	gnl|BL_ORD_ID|128048Itr_sc004419.1_g00003.1 Ipomoea trifida|NAC|NAC family protein	128048	5.72915e-05	48.7179	43.8986	78	38
TRINITY_DN523396_c11_g2_i3	HD-ZIP	535	gnl|BL_ORD_ID|269681Sopen09g021360.1 Solanum pennellii|HD-ZIP|HD-ZIP family protein	269681	1.46963e-21	59.2593	96.2857	135	80
TRINITY_DN523968_c7_g1_i4	FAR1	4898	gnl|BL_ORD_ID|199065LOC_Os04g22990.1 Oryza sativa subsp. japonica|FAR1|FAR1 family protein	199065	3.54586e-07	46.1538	58.5362	208	96
TRINITY_DN517165_c132_g5_i3	C2H2	364	gnl|BL_ORD_ID|297126TRIUR3_34542-P1 Triticum urartu|C2H2|C2H2 family protein	297126	1.02607e-09	84.2105	58.5362	38	32
TRINITY_DN517165_c99_g1_i1	FAR1	313	gnl|BL_ORD_ID|199065LOC_Os04g22990.1 Oryza sativa subsp. japonica|FAR1|FAR1 family protein	199065	0.00148455	48.8372	39.6614	86	42
TRINITY_DN494239_c1_g1_i1	LBD	235	gnl|BL_ORD_ID|269669Sopen05g028040.1 Solanum pennellii|LBD|LBD family protein	269669	5.7646e-06	48.1013	46.595	79	38
TRINITY_DN373939_c0_g3_i3	NAC	302	gnl|BL_ORD_ID|277362SapurV1A.0561s0300.1.p Salix purpurea|NAC|NAC family protein	277362	0.0206267	46.25	35.8094	80	37
TRINITY_DN435565_c0_g1_i2	B3	237	gnl|BL_ORD_ID|270192Sopen00g003940.1 Solanum pennellii|B3|B3 family protein	270192	3.71e-06	54.7945	46.9802	73	40
TRINITY_DN484436_c10_g6_i3	FAR1	216	gnl|BL_ORD_ID|199065LOC_Os04g22990.1 Oryza sativa subsp. japonica|FAR1|FAR1 family protein	199065	1.59924e-08	60.8696	53.9138	46	28
TRINITY_DN503383_c11_g1_i1	NAC	303	gnl|BL_ORD_ID|128048Itr_sc004419.1_g00003.1 Ipomoea trifida|NAC|NAC family protein	128048	0.000609479	50.6849	40.817	73	37
TRINITY_DN5885_c1_g1_i1	GATA	247	gnl|BL_ORD_ID|296559TRIUR3_22272-P1 Triticum urartu|GATA|GATA family protein	296559	2.9947e-12	82.0513	64.6994	39	32
TRINITY_DN225045_c0_g1_i2	FAR1	212	gnl|BL_ORD_ID|21158EMT21149 Aegilops tauschii|FAR1|FAR1 family protein	21158	5.48085e-06	68.4211	46.2098	38	26
TRINITY_DN523486_c92_g6_i2	bHLH	773	gnl|BL_ORD_ID|297244TRIUR3_29035-P1 Triticum urartu|bHLH|bHLH family protein	297244	1.00076e-17	73.913	85.1149	69	51
TRINITY_DN522831_c0_g4_i2	M-type_MADS	697	gnl|BL_ORD_ID|198356LOC_Os11g12360.1 Oryza sativa subsp. japonica|M-type_MADS|M-type_MADS family protein	198356	1.43935e-07	49.3902	54.6842	164	81
TRINITY_DN286131_c2_g3_i2	bHLH	258	gnl|BL_ORD_ID|296394TRIUR3_31817-P1 Triticum urartu|bHLH|bHLH family protein	296394	8.29971e-15	85.3659	71.2478	41	35
TRINITY_DN385019_c0_g1_i1	ZF-HD	235	gnl|BL_ORD_ID|269698Sopen05g016700.1 Solanum pennellii|ZF-HD|ZF-HD family protein	269698	1.27497e-06	55.5556	48.521	63	35
TRINITY_DN439987_c3_g4_i1	NAC	456	gnl|BL_ORD_ID|128048Itr_sc004419.1_g00003.1 Ipomoea trifida|NAC|NAC family protein	128048	1.67967e-21	58.3333	95.1301	120	70
TRINITY_DN445961_c48_g2_i1	M-type_MADS	304	gnl|BL_ORD_ID|21475EMT26600 Aegilops tauschii|M-type_MADS|M-type_MADS family protein	21475	0.00864002	50	36.965	74	37
TRINITY_DN488339_c18_g5_i2	M-type_MADS	678	gnl|BL_ORD_ID|278710PGSC0003DMP400020035 Solanum tuberosum|M-type_MADS|M-type_MADS family protein	278710	0.0306419	55.7692	38.1206	52	29
TRINITY_DN490110_c13_g6_i1	HD-ZIP	306	gnl|BL_ORD_ID|216651PH01000183G0940 Phyllostachys heterocycla|HD-ZIP|HD-ZIP family protein	216651	0.020861	50	36.1946	52	26
TRINITY_DN474846_c7_g8_i1	NAC	278	gnl|BL_ORD_ID|20708EMT33859 Aegilops tauschii|NAC|NAC family protein	20708	5.07258e-10	60.3175	58.9214	63	38
TRINITY_DN478248_c5_g6_i1	ZF-HD	276	gnl|BL_ORD_ID|269698Sopen05g016700.1 Solanum pennellii|ZF-HD|ZF-HD family protein	269698	9.60197e-12	68.1818	64.3142	66	45
TRINITY_DN395112_c1_g3_i2	ZF-HD	451	gnl|BL_ORD_ID|269698Sopen05g016700.1 Solanum pennellii|ZF-HD|ZF-HD family protein	269698	6.79263e-13	64.9351	69.707	77	50
TRINITY_DN315134_c0_g2_i2	ZF-HD	240	gnl|BL_ORD_ID|269698Sopen05g016700.1 Solanum pennellii|ZF-HD|ZF-HD family protein	269698	2.41261e-16	71.4286	77.411	70	50
TRINITY_DN456372_c0_g1_i1	FAR1	202	gnl|BL_ORD_ID|199065LOC_Os04g22990.1 Oryza sativa subsp. japonica|FAR1|FAR1 family protein	199065	2.19712e-05	50	44.669	64	32
TRINITY_DN523237_c18_g3_i1	HD-ZIP	1019	gnl|BL_ORD_ID|269681Sopen09g021360.1 Solanum pennellii|HD-ZIP|HD-ZIP family protein	269681	1.19459e-28	47.6015	122.094	271	129
TRINITY_DN333536_c0_g2_i1	Trihelix	237	gnl|BL_ORD_ID|297027TRIUR3_33328-P1 Triticum urartu|Trihelix|Trihelix family protein	297027	4.77426e-12	82.6087	64.3142	46	38
TRINITY_DN424869_c0_g1_i1	FAR1	226	gnl|BL_ORD_ID|82637Dca43462.1 Dianthus caryophyllus|FAR1|FAR1 family protein	82637	4.4635e-15	64.7887	73.1738	71	46
TRINITY_DN424957_c1_g2_i4	G2-like	208	gnl|BL_ORD_ID|269678Sopen11g010100.1 Solanum pennellii|G2-like|G2-like family protein	269678	0.000106041	50.7692	42.3578	65	33
TRINITY_DN467593_c63_g6_i1	FAR1	440	gnl|BL_ORD_ID|199065LOC_Os04g22990.1 Oryza sativa subsp. japonica|FAR1|FAR1 family protein	199065	1.67564e-10	59.322	62.3882	59	35
TRINITY_DN469768_c2_g4_i3	bHLH	238	gnl|BL_ORD_ID|270194Sopen12g030120.1 Solanum pennellii|bHLH|bHLH family protein	270194	4.082e-20	75.641	87.8113	78	59
TRINITY_DN489990_c22_g8_i1	FAR1	293	gnl|BL_ORD_ID|199065LOC_Os04g22990.1 Oryza sativa subsp. japonica|FAR1|FAR1 family protein	199065	9.30199e-13	65.4762	67.3958	84	55
TRINITY_DN496996_c1_g1_i5	NF-YC	246	gnl|BL_ORD_ID|263429Sme2.5_01876.1_g00001.1 Solanum melongena|NF-YC|NF-YC family protein	263429	5.5833e-23	72.8395	95.9005	81	59
TRINITY_DN522729_c17_g2_i7	TCP	673	gnl|BL_ORD_ID|270237Sopen12g015990.1 Solanum pennellii|TCP|TCP family protein	270237	2.18139e-11	45.8333	66.2402	144	66
TRINITY_DN517165_c131_g9_i4	bHLH	415	gnl|BL_ORD_ID|296394TRIUR3_31817-P1 Triticum urartu|bHLH|bHLH family protein	296394	1.88434e-21	93.75	91.2781	48	45
TRINITY_DN444254_c11_g1_i1	C2H2	207	gnl|BL_ORD_ID|297126TRIUR3_34542-P1 Triticum urartu|C2H2|C2H2 family protein	297126	1.71223e-11	84.2105	61.6178	38	32
TRINITY_DN199059_c3_g6_i1	B3	265	gnl|BL_ORD_ID|21154EMT05021 Aegilops tauschii|B3|B3 family protein	21154	3.46686e-21	89.5833	89.3521	48	43
TRINITY_DN423522_c0_g1_i1	NAC	210	gnl|BL_ORD_ID|296846TRIUR3_11787-P1 Triticum urartu|NAC|NAC family protein	296846	3.06744e-23	91.8367	94.7449	49	45
TRINITY_DN435974_c2_g1_i2	bHLH	220	gnl|BL_ORD_ID|296394TRIUR3_31817-P1 Triticum urartu|bHLH|bHLH family protein	296394	4.38821e-13	92.1053	65.855	38	35
TRINITY_DN444286_c1_g1_i1	FAR1	220	gnl|BL_ORD_ID|199065LOC_Os04g22990.1 Oryza sativa subsp. japonica|FAR1|FAR1 family protein	199065	5.65551e-13	60.8696	67.0106	69	42
TRINITY_DN467567_c3_g1_i1	ZF-HD	204	gnl|BL_ORD_ID|269698Sopen05g016700.1 Solanum pennellii|ZF-HD|ZF-HD family protein	269698	0.000449516	51.6667	40.4318	60	31
TRINITY_DN478590_c11_g1_i1	WRKY	210	gnl|BL_ORD_ID|302388Vradi0048s00350.1 Vigna radiata|WRKY|WRKY family protein	302388	0.0339807	64.7059	34.6538	34	22
TRINITY_DN486406_c28_g8_i1	FAR1	307	gnl|BL_ORD_ID|199065LOC_Os04g22990.1 Oryza sativa subsp. japonica|FAR1|FAR1 family protein	199065	9.49042e-08	55.8824	52.7582	68	38
TRINITY_DN506290_c14_g10_i1	C2H2	203	gnl|BL_ORD_ID|297126TRIUR3_34542-P1 Triticum urartu|C2H2|C2H2 family protein	297126	1.07273e-16	97.3684	76.2554	38	37
TRINITY_DN523411_c5_g4_i1	ARR-B	219	gnl|BL_ORD_ID|181588OB03G19140.1 Oryza brachyantha|ARR-B|ARR-B family protein	181588	0.0486801	49.0566	34.2686	53	26
TRINITY_DN500023_c66_g20_i2	ZF-HD	3883	gnl|BL_ORD_ID|269698Sopen05g016700.1 Solanum pennellii|ZF-HD|ZF-HD family protein	269698	0	70.1476	943.34	881	618
TRINITY_DN367715_c0_g1_i1	WRKY	205	gnl|BL_ORD_ID|250373Rsa1.0_07654.1_g00001.1 Raphanus sativus|WRKY|WRKY family protein	250373	0.0395147	51.5625	34.6538	64	33
TRINITY_DN460782_c0_g2_i1	M-type_MADS	218	gnl|BL_ORD_ID|198356LOC_Os11g12360.1 Oryza sativa subsp. japonica|M-type_MADS|M-type_MADS family protein	198356	0.00873852	53.3333	36.5798	60	32
TRINITY_DN476206_c7_g8_i2	NAC	213	gnl|BL_ORD_ID|128048Itr_sc004419.1_g00003.1 Ipomoea trifida|NAC|NAC family protein	128048	6.64952e-16	70.4918	75.485	61	43
TRINITY_DN514821_c22_g2_i1	MYB	215	gnl|BL_ORD_ID|283605Traes_6BL_9DC9A9192.2 Triticum aestivum|MYB_related|MYB_related family protein	283605	0.00191915	39.3939	38.5058	66	26
TRINITY_DN298518_c0_g2_i1	B3	237	gnl|BL_ORD_ID|20166EMT01685 Aegilops tauschii|B3|B3 family protein	20166	0.00790077	62.8571	36.965	35	22
TRINITY_DN392117_c2_g1_i1	M-type_MADS	203	gnl|BL_ORD_ID|120654KHN26160.1 Glycine soja|M-type_MADS|M-type_MADS family protein	120654	5.9851e-08	59.1837	50.447	49	29
TRINITY_DN430616_c0_g3_i1	NAC	267	gnl|BL_ORD_ID|128048Itr_sc004419.1_g00003.1 Ipomoea trifida|NAC|NAC family protein	128048	2.90707e-06	55.4054	47.7506	74	41
TRINITY_DN513242_c4_g1_i1	HD-ZIP	287	gnl|BL_ORD_ID|269681Sopen09g021360.1 Solanum pennellii|HD-ZIP|HD-ZIP family protein	269681	8.90865e-05	64.1026	43.5134	39	25
TRINITY_DN515317_c37_g3_i2	NAC	331	gnl|BL_ORD_ID|20708EMT33859 Aegilops tauschii|NAC|NAC family protein	20708	6.55455e-08	57.8947	53.1434	57	33
TRINITY_DN341176_c0_g1_i5	FAR1	252	gnl|BL_ORD_ID|21158EMT21149 Aegilops tauschii|FAR1|FAR1 family protein	21158	6.63717e-29	82.1918	112.849	73	60
TRINITY_DN507473_c25_g1_i1	AP2	238	gnl|BL_ORD_ID|157027Migut.N02798.1.p Mimulus guttatus|AP2|AP2 family protein	157027	0.00599616	52.2727	36.965	44	23
TRINITY_DN294736_c0_g1_i4	ARR-B	214	gnl|BL_ORD_ID|152113MDP0000248863 Malus domestica|ARR-B|ARR-B family protein	152113	0.017666	44.4444	35.4242	63	28
TRINITY_DN425768_c0_g1_i5	M-type_MADS	208	gnl|BL_ORD_ID|198356LOC_Os11g12360.1 Oryza sativa subsp. japonica|M-type_MADS|M-type_MADS family protein	198356	1.49942e-14	71.0145	71.633	69	49
TRINITY_DN460630_c12_g5_i4	ZF-HD	310	gnl|BL_ORD_ID|269698Sopen05g016700.1 Solanum pennellii|ZF-HD|ZF-HD family protein	269698	6.07936e-05	57.1429	43.8986	112	64
TRINITY_DN460695_c16_g3_i2	NAC	319	gnl|BL_ORD_ID|128048Itr_sc004419.1_g00003.1 Ipomoea trifida|NAC|NAC family protein	128048	4.03165e-19	63.6364	86.2705	110	70
TRINITY_DN463005_c1_g2_i1	NAC	201	gnl|BL_ORD_ID|128048Itr_sc004419.1_g00003.1 Ipomoea trifida|NAC|NAC family protein	128048	2.33453e-06	57.1429	47.3654	70	40
TRINITY_DN470447_c1_g2_i3	ERF	269	gnl|BL_ORD_ID|291652XP_010556248.1 Tarenaya hassleriana|ERF|ERF family protein	291652	4.26486e-22	67.4157	93.9745	89	60
TRINITY_DN480466_c6_g1_i1	B3	246	gnl|BL_ORD_ID|68011evm.model.supercontig_37.108 Carica papaya|B3|B3 family protein	68011	0.0365205	50	34.6538	50	25
TRINITY_DN515317_c36_g10_i6	NAC	264	gnl|BL_ORD_ID|20708EMT33859 Aegilops tauschii|NAC|NAC family protein	20708	3.98327e-09	59.6774	56.225	62	37
TRINITY_DN464613_c0_g1_i2	E2F DP	755	gnl|BL_ORD_ID|223767XP_008245529.1 Prunus mume|E2F/DP|E2F/DP family protein	223767	5.28335e-05	62.2642	47.3654	53	33
TRINITY_DN503572_c1_g1_i2	M-type_MADS	566	gnl|BL_ORD_ID|198356LOC_Os11g12360.1 Oryza sativa subsp. japonica|M-type_MADS|M-type_MADS family protein	198356	2.27813e-74	76.5957	249.595	188	144
TRINITY_DN523486_c81_g1_i1	NAC	236	gnl|BL_ORD_ID|128048Itr_sc004419.1_g00003.1 Ipomoea trifida|NAC|NAC family protein	128048	2.8737e-11	62.3377	62.3882	77	48
TRINITY_DN519360_c21_g6_i1	M-type_MADS	407	gnl|BL_ORD_ID|198356LOC_Os11g12360.1 Oryza sativa subsp. japonica|M-type_MADS|M-type_MADS family protein	198356	5.79595e-20	64.2857	90.1225	98	63
TRINITY_DN456372_c0_g2_i1	FAR1	224	gnl|BL_ORD_ID|199065LOC_Os04g22990.1 Oryza sativa subsp. japonica|FAR1|FAR1 family protein	199065	6.33132e-05	49.2063	43.5134	63	31
TRINITY_DN518200_c44_g16_i1	bHLH	248	gnl|BL_ORD_ID|296982TRIUR3_16897-P1 Triticum urartu|bHLH|bHLH family protein	296982	3.53323e-06	65.7895	45.0542	38	25
TRINITY_DN279829_c0_g2_i1	FAR1	219	gnl|BL_ORD_ID|199065LOC_Os04g22990.1 Oryza sativa subsp. japonica|FAR1|FAR1 family protein	199065	1.06261e-11	59.7222	63.5438	72	43
TRINITY_DN460835_c5_g1_i2	FAR1	320	gnl|BL_ORD_ID|199065LOC_Os04g22990.1 Oryza sativa subsp. japonica|FAR1|FAR1 family protein	199065	8.36354e-05	53.0303	43.5134	66	35
TRINITY_DN468737_c15_g1_i6	NAC	315	gnl|BL_ORD_ID|128048Itr_sc004419.1_g00003.1 Ipomoea trifida|NAC|NAC family protein	128048	0.0166074	60	36.1946	40	24
TRINITY_DN471092_c19_g7_i1	NAC	277	gnl|BL_ORD_ID|20708EMT33859 Aegilops tauschii|NAC|NAC family protein	20708	3.73268e-05	59.5745	44.2838	47	28
TRINITY_DN482023_c7_g4_i1	bHLH	239	gnl|BL_ORD_ID|296394TRIUR3_31817-P1 Triticum urartu|bHLH|bHLH family protein	296394	2.46214e-11	83.3333	61.2326	36	30
TRINITY_DN485455_c32_g6_i2	C2H2	564	gnl|BL_ORD_ID|297126TRIUR3_34542-P1 Triticum urartu|C2H2|C2H2 family protein	297126	4.79238e-07	69.4118	51.6026	85	59
TRINITY_DN512882_c12_g8_i6	EIL	313	gnl|BL_ORD_ID|296967TRIUR3_20987-P1 Triticum urartu|EIL|EIL family protein	296967	3.74093e-15	57.1429	73.9442	91	52
TRINITY_DN519360_c21_g4_i1	M-type_MADS	365	gnl|BL_ORD_ID|198356LOC_Os11g12360.1 Oryza sativa subsp. japonica|M-type_MADS|M-type_MADS family protein	198356	4.97688e-26	67.3267	107.071	101	68
TRINITY_DN402473_c0_g4_i1	ERF	273	gnl|BL_ORD_ID|127406Itr_sc000795.1_g00005.1 Ipomoea trifida|ERF|ERF family protein	127406	6.38132e-10	55.8824	58.9214	68	38
TRINITY_DN404337_c1_g7_i1	NF-YB	201	gnl|BL_ORD_ID|128119Itr_sc000950.1_g00003.1 Ipomoea trifida|NF-YB|NF-YB family protein	128119	9.19273e-09	61.7647	54.299	68	42
TRINITY_DN519628_c8_g1_i1	NAC	256	gnl|BL_ORD_ID|20269EMT14186 Aegilops tauschii|NAC|NAC family protein	20269	3.12962e-07	83.3333	48.521	36	30
TRINITY_DN441412_c6_g1_i6	bHLH	471	gnl|BL_ORD_ID|296982TRIUR3_16897-P1 Triticum urartu|bHLH|bHLH family protein	296982	1.76936e-15	70.9677	73.559	62	44
TRINITY_DN375359_c0_g2_i3	FAR1	264	gnl|BL_ORD_ID|81473Dca46628.1 Dianthus caryophyllus|FAR1|FAR1 family protein	81473	9.35933e-12	66.6667	62.3882	78	52
TRINITY_DN437360_c0_g1_i1	bHLH	203	gnl|BL_ORD_ID|270194Sopen12g030120.1 Solanum pennellii|bHLH|bHLH family protein	270194	1.99603e-27	85.0746	108.612	67	57
TRINITY_DN315323_c0_g1_i1	FAR1	205	gnl|BL_ORD_ID|199065LOC_Os04g22990.1 Oryza sativa subsp. japonica|FAR1|FAR1 family protein	199065	6.53769e-07	53.7313	48.9062	67	36
TRINITY_DN392288_c1_g1_i1	NAC	222	gnl|BL_ORD_ID|296846TRIUR3_11787-P1 Triticum urartu|NAC|NAC family protein	296846	1.85887e-11	77.7778	62.003	45	35
TRINITY_DN395660_c0_g3_i1	TCP	243	gnl|BL_ORD_ID|270237Sopen12g015990.1 Solanum pennellii|TCP|TCP family protein	270237	0.000762812	50.6173	40.0466	81	41
TRINITY_DN447205_c1_g2_i2	TCP	274	gnl|BL_ORD_ID|270237Sopen12g015990.1 Solanum pennellii|TCP|TCP family protein	270237	3.5164e-37	79.1209	137.887	91	72
TRINITY_DN455652_c27_g7_i1	B3	363	gnl|BL_ORD_ID|20166EMT01685 Aegilops tauschii|B3|B3 family protein	20166	0.0430985	50.9804	32.7278	51	26
TRINITY_DN464221_c6_g8_i1	ERF	206	gnl|BL_ORD_ID|41088XP_009146782.1 Brassica rapa|ERF|ERF family protein	41088	0.0264747	55.102	34.6538	49	27
TRINITY_DN487770_c2_g4_i1	NAC	283	gnl|BL_ORD_ID|296846TRIUR3_11787-P1 Triticum urartu|NAC|NAC family protein	296846	2.39747e-10	66.6667	59.6918	51	34
TRINITY_DN514250_c2_g5_i2	TCP	379	gnl|BL_ORD_ID|270237Sopen12g015990.1 Solanum pennellii|TCP|TCP family protein	270237	2.85634e-49	76.8	174.481	125	96
TRINITY_DN517165_c130_g4_i1	NAC	364	gnl|BL_ORD_ID|296846TRIUR3_11787-P1 Triticum urartu|NAC|NAC family protein	296846	2.0803e-06	60.7843	48.521	51	31
TRINITY_DN521689_c8_g2_i1	ERF	267	gnl|BL_ORD_ID|291652XP_010556248.1 Tarenaya hassleriana|ERF|ERF family protein	291652	8.57132e-11	77.7778	61.2326	45	35
TRINITY_DN523617_c80_g16_i1	ERF	2918	gnl|BL_ORD_ID|270781Sopen11g017580.1 Solanum pennellii|ERF|ERF family protein	270781	7.97429e-114	58.7209	386.726	516	303
TRINITY_DN522727_c44_g14_i1	ERF	631	gnl|BL_ORD_ID|270781Sopen11g017580.1 Solanum pennellii|ERF|ERF family protein	270781	2.61799e-43	64.4809	160.614	183	118
TRINITY_DN522526_c13_g5_i1	B3	927	gnl|BL_ORD_ID|20388EMT06404 Aegilops tauschii|B3|B3 family protein	20388	1.03179e-09	75.5102	62.003	49	37
TRINITY_DN468058_c3_g2_i2	M-type_MADS	228	gnl|BL_ORD_ID|198356LOC_Os11g12360.1 Oryza sativa subsp. japonica|M-type_MADS|M-type_MADS family protein	198356	1.82876e-27	82.1918	109.383	73	60
TRINITY_DN519778_c26_g1_i1	M-type_MADS	287	gnl|BL_ORD_ID|198356LOC_Os11g12360.1 Oryza sativa subsp. japonica|M-type_MADS|M-type_MADS family protein	198356	6.27644e-08	70.8333	53.1434	48	34
TRINITY_DN286131_c2_g1_i3	bHLH	237	gnl|BL_ORD_ID|296394TRIUR3_31817-P1 Triticum urartu|bHLH|bHLH family protein	296394	3.96356e-13	83.3333	66.2402	42	35
TRINITY_DN299733_c0_g1_i1	ZF-HD	206	gnl|BL_ORD_ID|269698Sopen05g016700.1 Solanum pennellii|ZF-HD|ZF-HD family protein	269698	1.00218e-18	75.8065	83.5741	62	47
TRINITY_DN466750_c5_g4_i1	C2H2	254	gnl|BL_ORD_ID|297126TRIUR3_34542-P1 Triticum urartu|C2H2|C2H2 family protein	297126	1.19616e-10	78.9474	60.077	38	30
TRINITY_DN485045_c9_g1_i2	FAR1	221	gnl|BL_ORD_ID|199065LOC_Os04g22990.1 Oryza sativa subsp. japonica|FAR1|FAR1 family protein	199065	2.75851e-06	63.6364	47.3654	55	35
TRINITY_DN485717_c22_g1_i1	NAC	206	gnl|BL_ORD_ID|296846TRIUR3_11787-P1 Triticum urartu|NAC|NAC family protein	296846	2.59907e-08	72.2222	52.7582	36	26
TRINITY_DN485904_c0_g6_i1	ZF-HD	254	gnl|BL_ORD_ID|269698Sopen05g016700.1 Solanum pennellii|ZF-HD|ZF-HD family protein	269698	5.96672e-10	63.7681	58.9214	69	44
TRINITY_DN512882_c11_g1_i8	NAC	351	gnl|BL_ORD_ID|128048Itr_sc004419.1_g00003.1 Ipomoea trifida|NAC|NAC family protein	128048	1.54659e-18	60.5042	85.1149	119	72
TRINITY_DN519778_c25_g1_i1	M-type_MADS	235	gnl|BL_ORD_ID|198356LOC_Os11g12360.1 Oryza sativa subsp. japonica|M-type_MADS|M-type_MADS family protein	198356	4.13111e-32	84.4156	122.865	77	65
TRINITY_DN328525_c0_g2_i1	TCP	208	gnl|BL_ORD_ID|270237Sopen12g015990.1 Solanum pennellii|TCP|TCP family protein	270237	0.00714727	41.0959	36.965	73	30
TRINITY_DN519995_c15_g4_i3	HRT-like	1411	gnl|BL_ORD_ID|20525EMT21368 Aegilops tauschii|HRT-like|HRT-like family protein	20525	1.30508e-32	65.7895	135.576	114	75
TRINITY_DN521689_c8_g7_i1	TCP	410	gnl|BL_ORD_ID|270237Sopen12g015990.1 Solanum pennellii|TCP|TCP family protein	270237	2.45767e-11	51.4019	64.6994	107	55
TRINITY_DN478248_c5_g1_i1	bHLH	224	gnl|BL_ORD_ID|56235Csa07g033870.1 Camelina sativa|bHLH|bHLH family protein	56235	0.0352869	61.5385	34.2686	39	24
TRINITY_DN489786_c21_g8_i1	NAC	427	gnl|BL_ORD_ID|296846TRIUR3_11787-P1 Triticum urartu|NAC|NAC family protein	296846	1.66483e-10	71.7391	61.2326	46	33
TRINITY_DN520833_c13_g4_i9	G2-like	253	gnl|BL_ORD_ID|97663FANhyb_rscf00000398.1.g00005.1 Fragaria x ananassa|G2-like|G2-like family protein	97663	5.9119e-11	67.5	61.2326	80	54
TRINITY_DN369702_c0_g1_i1	C2H2	212	gnl|BL_ORD_ID|284511Traes_5BL_C3F3A871A.1 Triticum aestivum|C2H2|C2H2 family protein	284511	0.0255577	44.2623	35.039	61	27
TRINITY_DN460695_c16_g5_i1	NAC	241	gnl|BL_ORD_ID|128048Itr_sc004419.1_g00003.1 Ipomoea trifida|NAC|NAC family protein	128048	2.56291e-06	80	47.7506	35	28
TRINITY_DN469667_c2_g4_i3	HD-ZIP	209	gnl|BL_ORD_ID|20784EMT29383 Aegilops tauschii|HD-ZIP|HD-ZIP family protein	20784	0.0166929	56.25	35.039	48	27
TRINITY_DN471159_c4_g1_i2	NAC	223	gnl|BL_ORD_ID|128048Itr_sc004419.1_g00003.1 Ipomoea trifida|NAC|NAC family protein	128048	1.54623e-08	63.0769	54.299	65	41
TRINITY_DN674226_c0_g1_i1	C2H2	202	gnl|BL_ORD_ID|296602TRIUR3_32111-P1 Triticum urartu|C2H2|C2H2 family protein	296602	2.0265e-15	86.3636	72.7886	44	38
TRINITY_DN455121_c0_g1_i1	ZF-HD	263	gnl|BL_ORD_ID|269698Sopen05g016700.1 Solanum pennellii|ZF-HD|ZF-HD family protein	269698	8.83286e-36	86.2069	133.65	87	75
TRINITY_DN471685_c11_g2_i1	HD-ZIP	376	gnl|BL_ORD_ID|82545Dca2137.1 Dianthus caryophyllus|HD-ZIP|HD-ZIP family protein	82545	2.56956e-13	65.7143	69.707	70	46
TRINITY_DN749789_c4_g2_i1	NF-YC	268	gnl|BL_ORD_ID|269751Sopen03g030560.1 Solanum pennellii|NF-YC|NF-YC family protein	269751	1.84846e-06	53.8462	48.1358	78	42
TRINITY_DN481874_c0_g10_i4	NAC	294	gnl|BL_ORD_ID|128048Itr_sc004419.1_g00003.1 Ipomoea trifida|NAC|NAC family protein	128048	1.04824e-11	62.963	64.3142	81	51
TRINITY_DN490126_c13_g4_i1	B3	240	gnl|BL_ORD_ID|270192Sopen00g003940.1 Solanum pennellii|B3|B3 family protein	270192	3.45271e-07	56.1644	50.0618	73	41
TRINITY_DN490403_c11_g2_i1	FAR1	245	gnl|BL_ORD_ID|144070Lsa008424 Lactuca sativa|FAR1|FAR1 family protein	144070	0.0295528	45.7143	35.039	70	32
TRINITY_DN517165_c132_g3_i3	MYB	726	gnl|BL_ORD_ID|20187EMT20255 Aegilops tauschii|MYB|MYB family protein	20187	1.15142e-40	81	147.517	100	81
TRINITY_DN523887_c4_g2_i1	bHLH	2625	gnl|BL_ORD_ID|21410EMT03129 Aegilops tauschii|bHLH|bHLH family protein	21410	3.10397e-31	50.5263	135.961	285	144
TRINITY_DN468058_c3_g1_i3	M-type_MADS	265	gnl|BL_ORD_ID|198356LOC_Os11g12360.1 Oryza sativa subsp. japonica|M-type_MADS|M-type_MADS family protein	198356	5.11271e-29	81.3953	114.39	86	70
TRINITY_DN195075_c2_g1_i1	FAR1	201	gnl|BL_ORD_ID|199065LOC_Os04g22990.1 Oryza sativa subsp. japonica|FAR1|FAR1 family protein	199065	0.000752115	47.619	39.6614	63	30
TRINITY_DN356619_c1_g1_i1	ZF-HD	231	gnl|BL_ORD_ID|269698Sopen05g016700.1 Solanum pennellii|ZF-HD|ZF-HD family protein	269698	1.78816e-29	80.5195	115.161	77	62
TRINITY_DN421888_c1_g1_i1	NF-YC	229	gnl|BL_ORD_ID|269751Sopen03g030560.1 Solanum pennellii|NF-YC|NF-YC family protein	269751	0.0139581	50	36.1946	60	30
TRINITY_DN462895_c9_g4_i1	NF-YB	222	gnl|BL_ORD_ID|296864TRIUR3_11916-P1 Triticum urartu|NF-YB|NF-YB family protein	296864	7.52147e-11	75.6757	59.3066	37	28
TRINITY_DN473854_c4_g2_i1	FAR1	254	gnl|BL_ORD_ID|199065LOC_Os04g22990.1 Oryza sativa subsp. japonica|FAR1|FAR1 family protein	199065	2.32192e-13	59.4937	68.9366	79	47
TRINITY_DN476991_c11_g1_i3	NAC	225	gnl|BL_ORD_ID|128048Itr_sc004419.1_g00003.1 Ipomoea trifida|NAC|NAC family protein	128048	1.92167e-08	64.7059	53.9138	51	33
TRINITY_DN475796_c30_g2_i6	MYB	1279	gnl|BL_ORD_ID|20187EMT20255 Aegilops tauschii|MYB|MYB family protein	20187	1.02946e-45	80.1802	166.392	111	89
TRINITY_DN249402_c0_g1_i2	C2H2	225	gnl|BL_ORD_ID|297126TRIUR3_34542-P1 Triticum urartu|C2H2|C2H2 family protein	297126	5.78939e-12	87.931	63.1586	58	51
TRINITY_DN312547_c0_g1_i1	ZF-HD	210	gnl|BL_ORD_ID|269698Sopen05g016700.1 Solanum pennellii|ZF-HD|ZF-HD family protein	269698	2.53732e-24	84.058	100.138	69	58
TRINITY_DN477905_c17_g1_i3	FAR1	280	gnl|BL_ORD_ID|199065LOC_Os04g22990.1 Oryza sativa subsp. japonica|FAR1|FAR1 family protein	199065	1.69975e-10	60	60.4622	65	39
TRINITY_DN488918_c6_g4_i8	C2H2	274	gnl|BL_ORD_ID|297126TRIUR3_34542-P1 Triticum urartu|C2H2|C2H2 family protein	297126	1.22866e-07	72.093	51.6026	43	31
TRINITY_DN514747_c23_g6_i2	bHLH	588	gnl|BL_ORD_ID|297244TRIUR3_29035-P1 Triticum urartu|bHLH|bHLH family protein	297244	6.52539e-24	83.3333	100.908	66	55
TRINITY_DN523746_c143_g1_i2	FAR1	345	gnl|BL_ORD_ID|199065LOC_Os04g22990.1 Oryza sativa subsp. japonica|FAR1|FAR1 family protein	199065	5.1119e-13	50.4587	68.9366	109	55
TRINITY_DN312321_c0_g3_i1	ERF	221	gnl|BL_ORD_ID|270781Sopen11g017580.1 Solanum pennellii|ERF|ERF family protein	270781	1.31638e-15	62.8571	74.7146	70	44
TRINITY_DN462279_c5_g8_i2	NAC	321	gnl|BL_ORD_ID|128048Itr_sc004419.1_g00003.1 Ipomoea trifida|NAC|NAC family protein	128048	6.35832e-07	58.1081	50.447	74	43
TRINITY_DN513738_c50_g15_i5	HB-other	341	gnl|BL_ORD_ID|22349AT4G02560.2 Arabidopsis thaliana|HB-other|HB-other family protein	22349	6.66553e-07	69.3878	50.0618	49	34
TRINITY_DN464384_c12_g10_i1	NAC	203	gnl|BL_ORD_ID|296846TRIUR3_11787-P1 Triticum urartu|NAC|NAC family protein	296846	2.47988e-21	83.6364	89.3521	55	46
TRINITY_DN421296_c0_g1_i1	SBP	225	gnl|BL_ORD_ID|10725Araha.5008s0002.1.p Arabidopsis halleri|SBP|SBP family protein	10725	0.0497476	49.2537	34.2686	67	33
TRINITY_DN462530_c1_g1_i1	ZF-HD	247	gnl|BL_ORD_ID|269698Sopen05g016700.1 Solanum pennellii|ZF-HD|ZF-HD family protein	269698	3.76114e-05	65.5172	44.2838	58	38
TRINITY_DN469768_c2_g4_i5	bHLH	242	gnl|BL_ORD_ID|270596Sopen12g030120.2 Solanum pennellii|bHLH|bHLH family protein	270596	1.53884e-27	78.75	109.383	80	63
TRINITY_DN523630_c6_g4_i4	NAC	280	gnl|BL_ORD_ID|125696MLOC_75795.5 Hordeum vulgare|NAC|NAC family protein	125696	5.96147e-15	68.4211	70.4774	57	39
TRINITY_DN476159_c33_g3_i3	C2H2	640	gnl|BL_ORD_ID|297126TRIUR3_34542-P1 Triticum urartu|C2H2|C2H2 family protein	297126	4.14949e-12	81.25	67.3958	48	39
TRINITY_DN395442_c1_g4_i1	YABBY	225	gnl|BL_ORD_ID|258264676791140 Sisymbrium irio|YABBY|YABBY family protein	258264	1.45543e-24	82.6087	99.3673	69	57
TRINITY_DN469768_c2_g3_i1	bHLH	258	gnl|BL_ORD_ID|270194Sopen12g030120.1 Solanum pennellii|bHLH|bHLH family protein	270194	3.92886e-26	81.1765	105.531	85	69
TRINITY_DN319026_c1_g1_i1	ZF-HD	210	gnl|BL_ORD_ID|269698Sopen05g016700.1 Solanum pennellii|ZF-HD|ZF-HD family protein	269698	3.09607e-25	80.597	102.449	67	54
TRINITY_DN456337_c1_g1_i8	ERF	464	gnl|BL_ORD_ID|291652XP_010556248.1 Tarenaya hassleriana|ERF|ERF family protein	291652	4.75151e-50	86.8421	177.178	114	99
TRINITY_DN460630_c11_g3_i6	ZF-HD	260	gnl|BL_ORD_ID|269698Sopen05g016700.1 Solanum pennellii|ZF-HD|ZF-HD family protein	269698	3.50518e-17	63.9535	80.1073	86	55
TRINITY_DN493364_c2_g2_i1	LBD	257	gnl|BL_ORD_ID|126762Itr_sc000159.1_g00052.1 Ipomoea trifida|LBD|LBD family protein	126762	9.41019e-14	59.7403	69.707	77	46
TRINITY_DN508838_c31_g1_i2	B3	423	gnl|BL_ORD_ID|20166EMT01685 Aegilops tauschii|B3|B3 family protein	20166	2.7522e-17	51.6129	82.4185	124	64
TRINITY_DN479981_c11_g7_i6	bHLH	208	gnl|BL_ORD_ID|20362EMT03170 Aegilops tauschii|bHLH|bHLH family protein	20362	3.47199e-10	80	56.9954	35	28
TRINITY_DN490351_c5_g4_i11	FAR1	253	gnl|BL_ORD_ID|199065LOC_Os04g22990.1 Oryza sativa subsp. japonica|FAR1|FAR1 family protein	199065	1.04377e-36	78.5714	136.346	84	66
TRINITY_DN523974_c10_g1_i3	FAR1	2886	gnl|BL_ORD_ID|199304LOC_Os02g16240.1 Oryza sativa subsp. japonica|FAR1|FAR1 family protein	199304	0.000122945	48.7179	49.2914	117	57
TRINITY_DN216295_c0_g1_i1	NAC	233	gnl|BL_ORD_ID|128048Itr_sc004419.1_g00003.1 Ipomoea trifida|NAC|NAC family protein	128048	2.95947e-22	71.4286	94.3597	77	55
TRINITY_DN477185_c12_g5_i3	NAC	372	gnl|BL_ORD_ID|128048Itr_sc004419.1_g00003.1 Ipomoea trifida|NAC|NAC family protein	128048	8.44469e-17	54.7009	80.4925	117	64
TRINITY_DN478335_c1_g1_i11	HD-ZIP	254	gnl|BL_ORD_ID|269681Sopen09g021360.1 Solanum pennellii|HD-ZIP|HD-ZIP family protein	269681	1.78312e-13	63.0952	68.9366	84	53
TRINITY_DN521381_c7_g8_i3	NAC	317	gnl|BL_ORD_ID|217455PH01000143G0710 Phyllostachys heterocycla|NAC|NAC family protein	217455	0.0350342	48.0769	35.4242	52	25
TRINITY_DN437054_c0_g1_i1	MYB	209	gnl|BL_ORD_ID|20187EMT20255 Aegilops tauschii|MYB|MYB family protein	20187	4.63596e-10	78.9474	57.3806	38	30
TRINITY_DN503924_c11_g2_i1	FAR1	220	gnl|BL_ORD_ID|199065LOC_Os04g22990.1 Oryza sativa subsp. japonica|FAR1|FAR1 family protein	199065	3.21795e-22	74.2857	93.9745	70	52
TRINITY_DN515317_c36_g10_i3	NAC	425	gnl|BL_ORD_ID|20708EMT33859 Aegilops tauschii|NAC|NAC family protein	20708	3.72421e-10	60.9375	60.4622	64	39
TRINITY_DN467212_c1_g3_i1	TCP	204	gnl|BL_ORD_ID|270237Sopen12g015990.1 Solanum pennellii|TCP|TCP family protein	270237	4.57229e-29	85.0746	113.62	67	57
TRINITY_DN470349_c0_g2_i1	HD-ZIP	222	gnl|BL_ORD_ID|82545Dca2137.1 Dianthus caryophyllus|HD-ZIP|HD-ZIP family protein	82545	1.9717e-16	82.7586	76.6406	58	48
TRINITY_DN474576_c3_g3_i1	TCP	210	gnl|BL_ORD_ID|269425Sopen05g005700.1 Solanum pennellii|TCP|TCP family protein	269425	0.0125534	59.0909	36.1946	44	26
TRINITY_DN520959_c15_g10_i1	NF-YA	474	gnl|BL_ORD_ID|269338Sopen02g006770.1 Solanum pennellii|NF-YA|NF-YA family protein	269338	0.00346965	58.6957	40.0466	46	27
TRINITY_DN523486_c94_g10_i1	FAR1	209	gnl|BL_ORD_ID|199065LOC_Os04g22990.1 Oryza sativa subsp. japonica|FAR1|FAR1 family protein	199065	2.39506e-20	73.5294	88.1965	68	50
TRINITY_DN401921_c0_g2_i12	NAC	353	gnl|BL_ORD_ID|296846TRIUR3_11787-P1 Triticum urartu|NAC|NAC family protein	296846	1.72484e-11	74.5098	63.5438	51	38
TRINITY_DN418693_c1_g4_i1	B3	260	gnl|BL_ORD_ID|270192Sopen00g003940.1 Solanum pennellii|B3|B3 family protein	270192	0.00164265	60.3448	39.2762	58	35
TRINITY_DN452501_c0_g1_i1	MYB	204	gnl|BL_ORD_ID|235962Potri.005G118500.1 Populus trichocarpa|MYB|MYB family protein	235962	0.0442965	47.6923	33.8834	65	31
TRINITY_DN454181_c6_g1_i1	B3	349	gnl|BL_ORD_ID|20166EMT01685 Aegilops tauschii|B3|B3 family protein	20166	0.00989046	49.4949	37.3502	99	49
TRINITY_DN496218_c5_g2_i1	NAC	213	gnl|BL_ORD_ID|20708EMT33859 Aegilops tauschii|NAC|NAC family protein	20708	0.00350717	57.7778	37.7354	45	26
TRINITY_DN500747_c5_g5_i1	ERF	205	gnl|BL_ORD_ID|291652XP_010556248.1 Tarenaya hassleriana|ERF|ERF family protein	291652	3.33411e-23	82.0896	96.2857	67	55
TRINITY_DN502385_c35_g8_i2	NAC	599	gnl|BL_ORD_ID|128048Itr_sc004419.1_g00003.1 Ipomoea trifida|NAC|NAC family protein	128048	6.44689e-13	45.1429	70.8626	175	79
TRINITY_DN503496_c3_g1_i1	ZF-HD	203	gnl|BL_ORD_ID|269698Sopen05g016700.1 Solanum pennellii|ZF-HD|ZF-HD family protein	269698	6.72508e-06	57.5758	46.2098	66	38
TRINITY_DN511359_c2_g2_i2	M-type_MADS	316	gnl|BL_ORD_ID|198356LOC_Os11g12360.1 Oryza sativa subsp. japonica|M-type_MADS|M-type_MADS family protein	198356	1.57868e-12	68.3333	67.0106	60	41
TRINITY_DN255301_c0_g2_i1	C2H2	229	gnl|BL_ORD_ID|297126TRIUR3_34542-P1 Triticum urartu|C2H2|C2H2 family protein	297126	0.000169392	81.8182	41.5874	55	45
TRINITY_DN523486_c94_g2_i1	FAR1	327	gnl|BL_ORD_ID|199065LOC_Os04g22990.1 Oryza sativa subsp. japonica|FAR1|FAR1 family protein	199065	1.01793e-28	72.6415	114.39	106	77
TRINITY_DN466511_c7_g10_i1	EIL	286	gnl|BL_ORD_ID|296967TRIUR3_20987-P1 Triticum urartu|EIL|EIL family protein	296967	0.0149301	67.6471	36.1946	34	23
TRINITY_DN173176_c0_g1_i1	NAC	237	gnl|BL_ORD_ID|296846TRIUR3_11787-P1 Triticum urartu|NAC|NAC family protein	296846	5.83321e-14	83.3333	69.3218	42	35
TRINITY_DN315989_c0_g1_i2	bHLH	230	gnl|BL_ORD_ID|216696PH01000069G1480 Phyllostachys heterocycla|bHLH|bHLH family protein	216696	1.6338e-05	53.75	42.3578	80	43
TRINITY_DN478853_c3_g1_i1	HSF	295	gnl|BL_ORD_ID|131248WALNUT_00020872-RA Juglans regia|HSF|HSF family protein	131248	0.0306847	57.1429	35.039	56	32
TRINITY_DN523207_c24_g6_i2	Nin-like	881	gnl|BL_ORD_ID|311924GRMZM2G472589_P01 Zea mays|Nin-like|Nin-like family protein	311924	3.49463e-05	52.0548	48.1358	73	38
TRINITY_DN443682_c8_g5_i1	ZF-HD	312	gnl|BL_ORD_ID|269698Sopen05g016700.1 Solanum pennellii|ZF-HD|ZF-HD family protein	269698	8.12649e-24	75.2941	100.138	85	64
TRINITY_DN473854_c4_g3_i3	FAR1	336	gnl|BL_ORD_ID|199065LOC_Os04g22990.1 Oryza sativa subsp. japonica|FAR1|FAR1 family protein	199065	4.60737e-12	56.8807	65.855	109	62
TRINITY_DN517165_c131_g23_i2	C2H2	1196	gnl|BL_ORD_ID|297126TRIUR3_34542-P1 Triticum urartu|C2H2|C2H2 family protein	297126	6.68011e-07	65.5914	54.299	93	61
TRINITY_DN446581_c0_g4_i1	ZF-HD	214	gnl|BL_ORD_ID|269698Sopen05g016700.1 Solanum pennellii|ZF-HD|ZF-HD family protein	269698	4.20236e-18	74.2857	82.0333	70	52
TRINITY_DN488918_c6_g4_i1	C2H2	336	gnl|BL_ORD_ID|297126TRIUR3_34542-P1 Triticum urartu|C2H2|C2H2 family protein	297126	4.15627e-17	80.8219	79.337	73	59
TRINITY_DN312321_c0_g2_i1	SBP	206	gnl|BL_ORD_ID|250740Rsa1.0_00158.1_g00006.1 Raphanus sativus|SBP|SBP family protein	250740	3.34944e-12	68.254	64.3142	63	43
TRINITY_DN288124_c0_g1_i1	bZIP	218	gnl|BL_ORD_ID|296500TRIUR3_08598-P1 Triticum urartu|bZIP|bZIP family protein	296500	0.000151903	64.5833	41.9726	48	31
TRINITY_DN410021_c2_g1_i2	Nin-like	213	gnl|BL_ORD_ID|250162Rsa1.0_00678.1_g00001.1 Raphanus sativus|Nin-like|Nin-like family protein	250162	0.00678822	51.5625	36.965	64	33
TRINITY_DN502636_c0_g1_i2	M-type_MADS	439	gnl|BL_ORD_ID|198356LOC_Os11g12360.1 Oryza sativa subsp. japonica|M-type_MADS|M-type_MADS family protein	198356	5.70823e-18	63.3333	84.7297	120	76
TRINITY_DN523868_c6_g6_i2	NAC	2046	gnl|BL_ORD_ID|35195XP_013639656.1 Brassica oleracea|NAC|NAC family protein	35195	9.14836e-22	47.4708	102.834	257	122
TRINITY_DN508130_c2_g6_i7	TCP	362	gnl|BL_ORD_ID|270237Sopen12g015990.1 Solanum pennellii|TCP|TCP family protein	270237	1.58402e-20	53.6232	91.2781	138	74
TRINITY_DN523813_c70_g6_i1	FAR1	243	gnl|BL_ORD_ID|199065LOC_Os04g22990.1 Oryza sativa subsp. japonica|FAR1|FAR1 family protein	199065	2.40258e-37	81.25	137.887	80	65
TRINITY_DN192330_c0_g1_i1	LBD	204	gnl|BL_ORD_ID|209211PDK_30s759331g002 Phoenix dactylifera|LBD|LBD family protein	209211	1.34449e-08	63.3333	53.5286	60	38
TRINITY_DN203911_c1_g1_i1	AP2	294	gnl|BL_ORD_ID|150709MDP0000824178 Malus domestica|AP2|AP2 family protein	150709	0.0340743	58.5366	35.039	41	24
TRINITY_DN333060_c0_g2_i1	NAC	311	gnl|BL_ORD_ID|128048Itr_sc004419.1_g00003.1 Ipomoea trifida|NAC|NAC family protein	128048	2.67804e-07	57.7465	51.2174	71	41
TRINITY_DN481320_c2_g7_i1	GRAS	204	gnl|BL_ORD_ID|297329TRIUR3_22881-P1 Triticum urartu|GRAS|GRAS family protein	297329	4.33275e-09	59.6774	55.4546	62	37
TRINITY_DN486962_c3_g4_i4	TCP	232	gnl|BL_ORD_ID|270237Sopen12g015990.1 Solanum pennellii|TCP|TCP family protein	270237	5.38668e-27	77.3333	107.842	75	58
TRINITY_DN517165_c132_g2_i4	FAR1	288	gnl|BL_ORD_ID|199065LOC_Os04g22990.1 Oryza sativa subsp. japonica|FAR1|FAR1 family protein	199065	0.000232985	50	41.9726	86	43
TRINITY_DN517165_c132_g5_i4	C2H2	409	gnl|BL_ORD_ID|297126TRIUR3_34542-P1 Triticum urartu|C2H2|C2H2 family protein	297126	1.22432e-09	84.2105	58.5362	38	32
TRINITY_DN456578_c20_g4_i1	NF-YB	251	gnl|BL_ORD_ID|296864TRIUR3_11916-P1 Triticum urartu|NF-YB|NF-YB family protein	296864	4.28795e-10	75	57.7658	36	27
TRINITY_DN477924_c49_g7_i1	NAC	248	gnl|BL_ORD_ID|128048Itr_sc004419.1_g00003.1 Ipomoea trifida|NAC|NAC family protein	128048	1.31723e-11	60.2564	63.5438	78	47
TRINITY_DN513115_c2_g3_i1	ZF-HD	301	gnl|BL_ORD_ID|269698Sopen05g016700.1 Solanum pennellii|ZF-HD|ZF-HD family protein	269698	9.54483e-16	58.1633	76.2554	98	57
TRINITY_DN423024_c2_g1_i1	NAC	214	gnl|BL_ORD_ID|296846TRIUR3_11787-P1 Triticum urartu|NAC|NAC family protein	296846	4.18005e-32	92.4242	119.013	66	61
TRINITY_DN477924_c49_g8_i1	B3	296	gnl|BL_ORD_ID|269643Sopen03g007470.1 Solanum pennellii|B3|B3 family protein	269643	2.93492e-19	54.0816	85.8853	98	53
TRINITY_DN470535_c19_g3_i1	FAR1	213	gnl|BL_ORD_ID|199065LOC_Os04g22990.1 Oryza sativa subsp. japonica|FAR1|FAR1 family protein	199065	1.21397e-07	50	51.6026	68	34
TRINITY_DN470535_c19_g5_i1	FAR1	264	gnl|BL_ORD_ID|199065LOC_Os04g22990.1 Oryza sativa subsp. japonica|FAR1|FAR1 family protein	199065	6.24395e-12	51.1628	64.6994	86	44
TRINITY_DN489673_c11_g7_i1	bHLH	252	gnl|BL_ORD_ID|297244TRIUR3_29035-P1 Triticum urartu|bHLH|bHLH family protein	297244	1.2034e-15	77.4648	73.9442	71	55
TRINITY_DN523402_c11_g8_i2	M-type_MADS	220	gnl|BL_ORD_ID|198356LOC_Os11g12360.1 Oryza sativa subsp. japonica|M-type_MADS|M-type_MADS family protein	198356	6.92241e-11	59.7222	61.2326	72	43
TRINITY_DN396747_c0_g2_i1	NAC	216	gnl|BL_ORD_ID|128048Itr_sc004419.1_g00003.1 Ipomoea trifida|NAC|NAC family protein	128048	9.11618e-09	63.9344	54.6842	61	39
TRINITY_DN442622_c0_g1_i2	M-type_MADS	357	gnl|BL_ORD_ID|198356LOC_Os11g12360.1 Oryza sativa subsp. japonica|M-type_MADS|M-type_MADS family protein	198356	6.43379e-08	62.2642	53.5286	53	33
TRINITY_DN479844_c14_g1_i1	NAC	244	gnl|BL_ORD_ID|20708EMT33859 Aegilops tauschii|NAC|NAC family protein	20708	4.85293e-07	58.1818	49.6766	55	32
TRINITY_DN464704_c19_g2_i1	NAC	210	gnl|BL_ORD_ID|296846TRIUR3_11787-P1 Triticum urartu|NAC|NAC family protein	296846	9.68425e-27	94.2308	103.99	52	49
TRINITY_DN464711_c26_g2_i1	FAR1	234	gnl|BL_ORD_ID|199065LOC_Os04g22990.1 Oryza sativa subsp. japonica|FAR1|FAR1 family protein	199065	0.00886481	68.5714	36.5798	35	24
TRINITY_DN488339_c18_g5_i1	M-type_MADS	758	gnl|BL_ORD_ID|278710PGSC0003DMP400020035 Solanum tuberosum|M-type_MADS|M-type_MADS family protein	278710	0.0380433	55.7692	38.1206	52	29
TRINITY_DN443829_c5_g3_i1	GRAS	1136	gnl|BL_ORD_ID|296836TRIUR3_07891-P1 Triticum urartu|GRAS|GRAS family protein	296836	5.06643e-28	65.1515	117.087	132	86
TRINITY_DN134403_c0_g1_i1	G2-like	222	gnl|BL_ORD_ID|269678Sopen11g010100.1 Solanum pennellii|G2-like|G2-like family protein	269678	4.32516e-11	62.3188	61.6178	69	43
TRINITY_DN389965_c0_g1_i2	MYB	277	gnl|BL_ORD_ID|20187EMT20255 Aegilops tauschii|MYB|MYB family protein	20187	1.94971e-19	83.0189	83.5741	53	44
TRINITY_DN497643_c6_g1_i1	MYB	309	gnl|BL_ORD_ID|20187EMT20255 Aegilops tauschii|MYB|MYB family protein	20187	1.21573e-09	63.3333	57.3806	60	38
TRINITY_DN508513_c3_g1_i1	GRAS	238	gnl|BL_ORD_ID|20915EMT12179 Aegilops tauschii|GRAS|GRAS family protein	20915	2.92467e-09	73.8095	55.0694	42	31
TRINITY_DN154172_c0_g1_i1	GRAS	284	gnl|BL_ORD_ID|297067TRIUR3_03541-P1 Triticum urartu|GRAS|GRAS family protein	297067	1.29188e-06	64.9123	48.521	57	37
TRINITY_DN485455_c30_g4_i1	ERF	264	gnl|BL_ORD_ID|66983augustus_masked-scaffold00465-abinit-gene-0.12-mRNA-1 Castanea mollissima|ERF|ERF family protein	66983	0.0225144	63.1579	35.4242	38	24
TRINITY_DN498611_c9_g3_i1	NAC	237	gnl|BL_ORD_ID|20708EMT33859 Aegilops tauschii|NAC|NAC family protein	20708	0.0238118	57.5	35.4242	40	23
TRINITY_DN471115_c9_g7_i1	MYB	276	gnl|BL_ORD_ID|20187EMT20255 Aegilops tauschii|MYB|MYB family protein	20187	7.63051e-40	82.3529	139.428	85	70
TRINITY_DN407964_c1_g1_i1	M-type_MADS	266	gnl|BL_ORD_ID|198356LOC_Os11g12360.1 Oryza sativa subsp. japonica|M-type_MADS|M-type_MADS family protein	198356	2.93227e-17	68.4211	80.4925	76	52
TRINITY_DN466861_c5_g1_i1	NAC	214	gnl|BL_ORD_ID|128048Itr_sc004419.1_g00003.1 Ipomoea trifida|NAC|NAC family protein	128048	1.20435e-22	77.6119	95.1301	67	52
TRINITY_DN467212_c1_g1_i1	HD-ZIP	215	gnl|BL_ORD_ID|269681Sopen09g021360.1 Solanum pennellii|HD-ZIP|HD-ZIP family protein	269681	1.99799e-29	81.6901	114.775	71	58
TRINITY_DN502918_c5_g6_i2	ERF	511	gnl|BL_ORD_ID|291652XP_010556248.1 Tarenaya hassleriana|ERF|ERF family protein	291652	1.68843e-57	70.2381	199.134	168	118
TRINITY_DN437558_c3_g1_i2	YABBY	211	gnl|BL_ORD_ID|258264676791140 Sisymbrium irio|YABBY|YABBY family protein	258264	3.85385e-27	81.8182	106.301	66	54
TRINITY_DN462188_c3_g1_i2	ZF-HD	265	gnl|BL_ORD_ID|269698Sopen05g016700.1 Solanum pennellii|ZF-HD|ZF-HD family protein	269698	3.80499e-11	56.3218	62.3882	87	49
TRINITY_DN468969_c7_g1_i1	ERF	209	gnl|BL_ORD_ID|291652XP_010556248.1 Tarenaya hassleriana|ERF|ERF family protein	291652	6.22714e-24	76.8116	98.5969	69	53
TRINITY_DN505411_c191_g1_i1	MYB	201	gnl|BL_ORD_ID|20187EMT20255 Aegilops tauschii|MYB|MYB family protein	20187	4.5116e-08	55.5556	51.6026	63	35
TRINITY_DN514821_c23_g9_i1	HD-ZIP	238	gnl|BL_ORD_ID|20784EMT29383 Aegilops tauschii|HD-ZIP|HD-ZIP family protein	20784	0.0001663	55	40.817	60	33
TRINITY_DN274230_c1_g5_i1	LBD	212	gnl|BL_ORD_ID|250519Rsa1.0_02878.1_g00005.1 Raphanus sativus|LBD|LBD family protein	250519	2.04296e-09	65.9574	50.447	47	31
TRINITY_DN476935_c0_g2_i2	M-type_MADS	245	gnl|BL_ORD_ID|198356LOC_Os11g12360.1 Oryza sativa subsp. japonica|M-type_MADS|M-type_MADS family protein	198356	2.15485e-27	77.7778	109.383	81	63
TRINITY_DN481131_c3_g1_i1	GRAS	260	gnl|BL_ORD_ID|297329TRIUR3_22881-P1 Triticum urartu|GRAS|GRAS family protein	297329	6.60106e-08	73.3333	52.373	45	33
TRINITY_DN410376_c0_g2_i3	NAC	338	gnl|BL_ORD_ID|128048Itr_sc004419.1_g00003.1 Ipomoea trifida|NAC|NAC family protein	128048	1.22844e-13	61.3636	70.8626	88	54
TRINITY_DN464439_c3_g2_i1	NAC	271	gnl|BL_ORD_ID|296846TRIUR3_11787-P1 Triticum urartu|NAC|NAC family protein	296846	2.0538e-14	77.0833	70.8626	48	37
TRINITY_DN358630_c0_g1_i1	FAR1	216	gnl|BL_ORD_ID|199065LOC_Os04g22990.1 Oryza sativa subsp. japonica|FAR1|FAR1 family protein	199065	3.50101e-27	80	108.227	70	56
TRINITY_DN406731_c2_g1_i1	NAC	201	gnl|BL_ORD_ID|296846TRIUR3_11787-P1 Triticum urartu|NAC|NAC family protein	296846	1.38771e-13	74.5098	67.781	51	38
TRINITY_DN434284_c1_g1_i1	FAR1	298	gnl|BL_ORD_ID|81473Dca46628.1 Dianthus caryophyllus|FAR1|FAR1 family protein	81473	2.15191e-25	70.8333	100.523	96	68
TRINITY_DN461728_c15_g2_i1	AP2	234	gnl|BL_ORD_ID|209331PDK_30s782571g001 Phoenix dactylifera|AP2|AP2 family protein	209331	0.0401638	44.9275	34.6538	69	31
TRINITY_DN473755_c2_g9_i6	HD-ZIP	227	gnl|BL_ORD_ID|269681Sopen09g021360.1 Solanum pennellii|HD-ZIP|HD-ZIP family protein	269681	3.31898e-13	68.4211	67.781	57	39
TRINITY_DN502918_c5_g4_i3	FAR1	222	gnl|BL_ORD_ID|81473Dca46628.1 Dianthus caryophyllus|FAR1|FAR1 family protein	81473	5.70336e-22	79.1667	89.7373	72	57
TRINITY_DN512167_c31_g1_i1	M-type_MADS	1306	gnl|BL_ORD_ID|198356LOC_Os11g12360.1 Oryza sativa subsp. japonica|M-type_MADS|M-type_MADS family protein	198356	1.56238e-37	53.0172	150.984	232	123
TRINITY_DN501540_c4_g4_i1	HD-ZIP	246	gnl|BL_ORD_ID|269681Sopen09g021360.1 Solanum pennellii|HD-ZIP|HD-ZIP family protein	269681	2.47067e-35	88.3117	132.109	77	68
TRINITY_DN501540_c4_g2_i1	HD-ZIP	207	gnl|BL_ORD_ID|269681Sopen09g021360.1 Solanum pennellii|HD-ZIP|HD-ZIP family protein	269681	7.10396e-32	89.5522	121.709	67	60
TRINITY_DN464711_c27_g5_i6	MYB	391	gnl|BL_ORD_ID|20187EMT20255 Aegilops tauschii|MYB|MYB family protein	20187	6.18058e-47	81.7308	159.844	104	85
TRINITY_DN469331_c3_g1_i2	HD-ZIP	368	gnl|BL_ORD_ID|82545Dca2137.1 Dianthus caryophyllus|HD-ZIP|HD-ZIP family protein	82545	2.60957e-06	44.8718	39.6614	78	35
TRINITY_DN476991_c12_g2_i1	B3	201	gnl|BL_ORD_ID|269643Sopen03g007470.1 Solanum pennellii|B3|B3 family protein	269643	3.02325e-07	50.8475	49.6766	59	30
TRINITY_DN523878_c15_g2_i1	FAR1	2894	gnl|BL_ORD_ID|25232Bradi5g03565.1.p Brachypodium distachyon|FAR1|FAR1 family protein	25232	4.57709e-52	74.8344	194.126	151	113
TRINITY_DN468458_c5_g1_i1	GRAS	214	gnl|BL_ORD_ID|296836TRIUR3_07891-P1 Triticum urartu|GRAS|GRAS family protein	296836	5.3978e-15	71.2329	71.633	73	52
TRINITY_DN225784_c1_g2_i2	FAR1	209	gnl|BL_ORD_ID|199065LOC_Os04g22990.1 Oryza sativa subsp. japonica|FAR1|FAR1 family protein	199065	8.73953e-11	63.7681	60.4622	69	44
TRINITY_DN288124_c0_g1_i2	bZIP	223	gnl|BL_ORD_ID|296500TRIUR3_08598-P1 Triticum urartu|bZIP|bZIP family protein	296500	0.0270016	57.4468	35.039	47	27
TRINITY_DN379729_c1_g2_i1	FAR1	257	gnl|BL_ORD_ID|82637Dca43462.1 Dianthus caryophyllus|FAR1|FAR1 family protein	82637	2.36777e-05	52.7027	44.669	74	39
TRINITY_DN464384_c12_g2_i6	NAC	276	gnl|BL_ORD_ID|296846TRIUR3_11787-P1 Triticum urartu|NAC|NAC family protein	296846	1.3448e-24	92.5926	99.3673	54	50
TRINITY_DN467593_c57_g1_i4	FAR1	344	gnl|BL_ORD_ID|199065LOC_Os04g22990.1 Oryza sativa subsp. japonica|FAR1|FAR1 family protein	199065	0.0125958	55	36.965	40	22
TRINITY_DN481309_c4_g4_i8	TCP	329	gnl|BL_ORD_ID|270237Sopen12g015990.1 Solanum pennellii|TCP|TCP family protein	270237	6.97255e-42	88.764	152.525	89	79
TRINITY_DN410434_c0_g1_i1	HD-ZIP	250	gnl|BL_ORD_ID|82545Dca2137.1 Dianthus caryophyllus|HD-ZIP|HD-ZIP family protein	82545	2.88849e-29	84.9315	113.62	73	62
TRINITY_DN510074_c45_g1_i2	C2H2	358	gnl|BL_ORD_ID|21127EMT02428 Aegilops tauschii|C2H2|C2H2 family protein	21127	1.5653e-12	87.1795	64.3142	39	34
TRINITY_DN303807_c0_g1_i2	ZF-HD	201	gnl|BL_ORD_ID|269698Sopen05g016700.1 Solanum pennellii|ZF-HD|ZF-HD family protein	269698	6.35484e-25	77.6119	101.679	67	52
TRINITY_DN416207_c0_g1_i1	ZF-HD	270	gnl|BL_ORD_ID|269698Sopen05g016700.1 Solanum pennellii|ZF-HD|ZF-HD family protein	269698	6.50507e-14	71.6667	70.8626	60	43
TRINITY_DN468342_c5_g2_i1	TCP	301	gnl|BL_ORD_ID|270237Sopen12g015990.1 Solanum pennellii|TCP|TCP family protein	270237	1.15195e-05	51.7647	46.2098	85	44
TRINITY_DN523946_c18_g1_i4	TCP	471	gnl|BL_ORD_ID|270237Sopen12g015990.1 Solanum pennellii|TCP|TCP family protein	270237	3.85882e-33	61.2121	129.413	165	101
TRINITY_DN190927_c0_g1_i1	ERF	207	gnl|BL_ORD_ID|270781Sopen11g017580.1 Solanum pennellii|ERF|ERF family protein	270781	9.86082e-09	58.6207	54.299	58	34
TRINITY_DN521689_c8_g2_i2	TCP	443	gnl|BL_ORD_ID|270237Sopen12g015990.1 Solanum pennellii|TCP|TCP family protein	270237	9.91627e-50	78.6207	176.792	145	114
TRINITY_DN493879_c31_g9_i3	NAC	708	gnl|BL_ORD_ID|296846TRIUR3_11787-P1 Triticum urartu|NAC|NAC family protein	296846	3.25526e-31	92.4242	123.25	66	61
TRINITY_DN350979_c0_g1_i1	G2-like	211	gnl|BL_ORD_ID|269678Sopen11g010100.1 Solanum pennellii|G2-like|G2-like family protein	269678	0.000518091	52.9412	40.4318	51	27
TRINITY_DN465484_c16_g3_i1	NAC	251	gnl|BL_ORD_ID|128048Itr_sc004419.1_g00003.1 Ipomoea trifida|NAC|NAC family protein	128048	8.43612e-14	62.1951	70.0922	82	51
TRINITY_DN488920_c2_g1_i1	M-type_MADS	396	gnl|BL_ORD_ID|198356LOC_Os11g12360.1 Oryza sativa subsp. japonica|M-type_MADS|M-type_MADS family protein	198356	6.20948e-25	63.0631	104.375	111	70
TRINITY_DN495050_c1_g5_i1	TCP	226	gnl|BL_ORD_ID|270237Sopen12g015990.1 Solanum pennellii|TCP|TCP family protein	270237	6.03448e-25	72	102.064	75	54
TRINITY_DN474846_c7_g6_i1	NAC	231	gnl|BL_ORD_ID|20708EMT33859 Aegilops tauschii|NAC|NAC family protein	20708	8.00442e-06	59.6154	45.8246	52	31
TRINITY_DN467892_c0_g1_i1	ERF	240	gnl|BL_ORD_ID|129018Jcr4S11523.10 Jatropha curcas|ERF|ERF family protein	129018	0.0364437	54.2373	34.6538	59	32
TRINITY_DN384226_c2_g1_i2	bHLH	266	gnl|BL_ORD_ID|296394TRIUR3_31817-P1 Triticum urartu|bHLH|bHLH family protein	296394	1.87194e-21	91.6667	89.3521	48	44
TRINITY_DN441927_c1_g1_i1	B3	270	gnl|BL_ORD_ID|269643Sopen03g007470.1 Solanum pennellii|B3|B3 family protein	269643	7.16544e-05	46.2963	43.5134	54	25
TRINITY_DN441927_c1_g2_i1	ZF-HD	238	gnl|BL_ORD_ID|269698Sopen05g016700.1 Solanum pennellii|ZF-HD|ZF-HD family protein	269698	5.61358e-05	47.8261	43.5134	69	33
TRINITY_DN446321_c1_g5_i1	ERF	205	gnl|BL_ORD_ID|291652XP_010556248.1 Tarenaya hassleriana|ERF|ERF family protein	291652	8.92374e-22	72.7273	92.0485	66	48
TRINITY_DN444350_c1_g1_i1	ZF-HD	442	gnl|BL_ORD_ID|269698Sopen05g016700.1 Solanum pennellii|ZF-HD|ZF-HD family protein	269698	2.65119e-63	82.8767	216.083	146	121
TRINITY_DN500094_c13_g3_i1	C3H	209	gnl|BL_ORD_ID|145505Lus10019709 Linum usitatissimum|C3H|C3H family protein	145505	0.0213967	56.4103	35.4242	39	22
TRINITY_DN387414_c1_g1_i1	TCP	211	gnl|BL_ORD_ID|270237Sopen12g015990.1 Solanum pennellii|TCP|TCP family protein	270237	2.62712e-19	81.4286	85.5001	70	57
TRINITY_DN473032_c10_g6_i1	B3	262	gnl|BL_ORD_ID|270192Sopen00g003940.1 Solanum pennellii|B3|B3 family protein	270192	1.46872e-05	60.3175	45.4394	63	38
TRINITY_DN464384_c12_g2_i5	NAC	227	gnl|BL_ORD_ID|296846TRIUR3_11787-P1 Triticum urartu|NAC|NAC family protein	296846	9.61827e-13	91.4286	65.4698	35	32
TRINITY_DN488590_c1_g6_i1	M-type_MADS	201	gnl|BL_ORD_ID|198356LOC_Os11g12360.1 Oryza sativa subsp. japonica|M-type_MADS|M-type_MADS family protein	198356	2.16606e-10	63.1579	59.3066	57	36
TRINITY_DN465754_c10_g3_i2	FAR1	234	gnl|BL_ORD_ID|307257XP_015878565.1 Ziziphus jujuba|FAR1|FAR1 family protein	307257	0.0235669	43.2432	35.4242	74	32
TRINITY_DN467593_c63_g3_i1	MYB	216	gnl|BL_ORD_ID|20187EMT20255 Aegilops tauschii|MYB|MYB family protein	20187	3.48399e-11	59.1549	60.4622	71	42
TRINITY_DN471195_c1_g2_i9	NAC	348	gnl|BL_ORD_ID|296846TRIUR3_11787-P1 Triticum urartu|NAC|NAC family protein	296846	2.32679e-10	74.4186	60.077	43	32
TRINITY_DN518536_c29_g21_i1	GRAS	218	gnl|BL_ORD_ID|103313Gh_Sca004802G04 Gossypium hirsutum|GRAS|GRAS family protein	103313	0.0205857	60.5263	35.4242	38	23
TRINITY_DN522025_c42_g2_i1	AP2	1337	gnl|BL_ORD_ID|209331PDK_30s782571g001 Phoenix dactylifera|AP2|AP2 family protein	209331	0.00409464	45.2991	42.743	117	53
TRINITY_DN214844_c0_g2_i1	HD-ZIP	256	gnl|BL_ORD_ID|82545Dca2137.1 Dianthus caryophyllus|HD-ZIP|HD-ZIP family protein	82545	2.12371e-21	83.3333	66.2402	48	40
TRINITY_DN522747_c12_g6_i1	HB-PHD	1153	gnl|BL_ORD_ID|20988EMT18532 Aegilops tauschii|HB-PHD|HB-PHD family protein	20988	8.71757e-06	64.1026	50.8322	78	50
TRINITY_DN523420_c3_g2_i1	M-type_MADS	413	gnl|BL_ORD_ID|198356LOC_Os11g12360.1 Oryza sativa subsp. japonica|M-type_MADS|M-type_MADS family protein	198356	7.87016e-20	57.7236	89.7373	123	71
TRINITY_DN245342_c1_g1_i1	ERF	232	gnl|BL_ORD_ID|291652XP_010556248.1 Tarenaya hassleriana|ERF|ERF family protein	291652	3.49803e-26	76.9231	105.145	78	60
TRINITY_DN315986_c1_g1_i1	NAC	202	gnl|BL_ORD_ID|84783Do022798.1 Dichanthelium oligosanthes|NAC|NAC family protein	84783	5.35107e-05	54.6875	43.1282	64	35
TRINITY_DN478066_c8_g5_i3	RAV	358	gnl|BL_ORD_ID|297348TRIUR3_24851-P1 Triticum urartu|RAV|RAV family protein	297348	0.00188411	48.7179	34.6538	78	38
TRINITY_DN523745_c23_g1_i2	NAC	207	gnl|BL_ORD_ID|296846TRIUR3_11787-P1 Triticum urartu|NAC|NAC family protein	296846	6.81985e-15	67.7419	71.633	62	42
TRINITY_DN465380_c5_g4_i1	FAR1	207	gnl|BL_ORD_ID|199065LOC_Os04g22990.1 Oryza sativa subsp. japonica|FAR1|FAR1 family protein	199065	9.64388e-12	63.2353	63.5438	68	43
TRINITY_DN519628_c11_g2_i4	M-type_MADS	511	gnl|BL_ORD_ID|198356LOC_Os11g12360.1 Oryza sativa subsp. japonica|M-type_MADS|M-type_MADS family protein	198356	6.9815e-15	46.4481	76.2554	183	85
TRINITY_DN453475_c1_g6_i2	ERF	282	gnl|BL_ORD_ID|291652XP_010556248.1 Tarenaya hassleriana|ERF|ERF family protein	291652	6.45882e-34	78.4946	128.257	93	73
TRINITY_DN481074_c2_g3_i1	MYB	264	gnl|BL_ORD_ID|296368TRIUR3_21241-P1 Triticum urartu|MYB|MYB family protein	296368	2.94378e-14	88.8889	70.4774	45	40
TRINITY_DN491812_c2_g2_i1	M-type_MADS	222	gnl|BL_ORD_ID|198356LOC_Os11g12360.1 Oryza sativa subsp. japonica|M-type_MADS|M-type_MADS family protein	198356	7.4854e-14	64.7887	69.707	71	46
TRINITY_DN462334_c0_g1_i3	M-type_MADS	306	gnl|BL_ORD_ID|198356LOC_Os11g12360.1 Oryza sativa subsp. japonica|M-type_MADS|M-type_MADS family protein	198356	6.63489e-49	88.1188	172.17	101	89
TRINITY_DN449618_c2_g4_i1	NAC	275	gnl|BL_ORD_ID|128048Itr_sc004419.1_g00003.1 Ipomoea trifida|NAC|NAC family protein	128048	3.09198e-31	74.1573	120.939	89	66
TRINITY_DN481568_c4_g3_i1	MYB	209	gnl|BL_ORD_ID|20187EMT20255 Aegilops tauschii|MYB|MYB family protein	20187	5.69981e-07	72.093	48.521	43	31
TRINITY_DN519107_c6_g15_i1	NF-YC	201	gnl|BL_ORD_ID|263499Sme2.5_17281.1_g00001.1 Solanum melongena|NF-YC|NF-YC family protein	263499	0.000906146	52	39.2762	50	26
TRINITY_DN519560_c40_g1_i3	TCP	829	gnl|BL_ORD_ID|270237Sopen12g015990.1 Solanum pennellii|TCP|TCP family protein	270237	1.78884e-08	35.5705	58.5362	298	106
TRINITY_DN522213_c53_g14_i2	M-type_MADS	707	gnl|BL_ORD_ID|198356LOC_Os11g12360.1 Oryza sativa subsp. japonica|M-type_MADS|M-type_MADS family protein	198356	2.25521e-41	59.1346	156.377	208	123
TRINITY_DN425832_c2_g1_i1	bHLH	687	gnl|BL_ORD_ID|296982TRIUR3_16897-P1 Triticum urartu|bHLH|bHLH family protein	296982	6.24664e-37	90.2778	132.88	72	65
TRINITY_DN523809_c5_g1_i2	B3	721	gnl|BL_ORD_ID|199268LOC_Os03g06850.3 Oryza sativa subsp. japonica|B3|B3 family protein	199268	0.0036904	60.5263	38.891	38	23
TRINITY_DN505411_c210_g14_i1	NAC	366	gnl|BL_ORD_ID|21294EMT28823 Aegilops tauschii|NAC|NAC family protein	21294	0.00133848	60	40.0466	55	33
TRINITY_DN395072_c2_g2_i1	C2H2	248	gnl|BL_ORD_ID|21127EMT02428 Aegilops tauschii|C2H2|C2H2 family protein	21127	0.00120891	62.2222	38.5058	45	28
TRINITY_DN482192_c3_g4_i1	B3	202	gnl|BL_ORD_ID|270192Sopen00g003940.1 Solanum pennellii|B3|B3 family protein	270192	0.000468015	59.7015	40.4318	67	40
TRINITY_DN455121_c0_g2_i1	ZF-HD	226	gnl|BL_ORD_ID|269698Sopen05g016700.1 Solanum pennellii|ZF-HD|ZF-HD family protein	269698	8.76373e-28	85.3333	110.153	75	64
TRINITY_DN477185_c13_g1_i3	NAC	368	gnl|BL_ORD_ID|128048Itr_sc004419.1_g00003.1 Ipomoea trifida|NAC|NAC family protein	128048	9.78025e-19	56.9106	85.8853	123	70
TRINITY_DN48184_c7_g1_i1	C2H2	460	gnl|BL_ORD_ID|297126TRIUR3_34542-P1 Triticum urartu|C2H2|C2H2 family protein	297126	0.000292403	70	42.743	40	28
TRINITY_DN412082_c8_g5_i6	TCP	374	gnl|BL_ORD_ID|269425Sopen05g005700.1 Solanum pennellii|TCP|TCP family protein	269425	8.40961e-20	60.1695	88.9669	118	71
TRINITY_DN488920_c3_g8_i3	M-type_MADS	278	gnl|BL_ORD_ID|198356LOC_Os11g12360.1 Oryza sativa subsp. japonica|M-type_MADS|M-type_MADS family protein	198356	2.93203e-13	58.4615	68.9366	65	38
TRINITY_DN507473_c25_g2_i2	C2H2	231	gnl|BL_ORD_ID|7606Aqcoe4G180200.1.p Aquilegia coerulea|C2H2|C2H2 family protein	7606	0.0100205	46.3415	35.4242	82	38
TRINITY_DN510077_c14_g3_i2	FAR1	402	gnl|BL_ORD_ID|199065LOC_Os04g22990.1 Oryza sativa subsp. japonica|FAR1|FAR1 family protein	199065	1.21655e-06	52.3077	50.0618	65	34
TRINITY_DN523486_c91_g1_i5	ZF-HD	986	gnl|BL_ORD_ID|269698Sopen05g016700.1 Solanum pennellii|ZF-HD|ZF-HD family protein	269698	8.44717e-42	48.2972	160.999	323	156
TRINITY_DN513738_c50_g7_i3	HB-other	282	gnl|BL_ORD_ID|12062Araha.9182s0008.1.p Arabidopsis halleri|HB-other|HB-other family protein	12062	0.0239088	56.4103	35.8094	39	22
TRINITY_DN519628_c11_g2_i3	M-type_MADS	612	gnl|BL_ORD_ID|198356LOC_Os11g12360.1 Oryza sativa subsp. japonica|M-type_MADS|M-type_MADS family protein	198356	1.35267e-28	48.6239	117.857	218	106
TRINITY_DN523746_c143_g4_i4	FAR1	1037	gnl|BL_ORD_ID|199065LOC_Os04g22990.1 Oryza sativa subsp. japonica|FAR1|FAR1 family protein	199065	1.19121e-05	49.505	50.447	101	50
TRINITY_DN523420_c3_g10_i1	M-type_MADS	299	gnl|BL_ORD_ID|198356LOC_Os11g12360.1 Oryza sativa subsp. japonica|M-type_MADS|M-type_MADS family protein	198356	1.67545e-11	50.9804	63.929	102	52
TRINITY_DN471583_c4_g1_i1	C2H2	202	gnl|BL_ORD_ID|297126TRIUR3_34542-P1 Triticum urartu|C2H2|C2H2 family protein	297126	4.7027e-18	86	80.1073	50	43
TRINITY_DN499136_c7_g5_i1	NAC	246	gnl|BL_ORD_ID|20708EMT33859 Aegilops tauschii|NAC|NAC family protein	20708	8.23789e-12	58.9744	63.5438	78	46
TRINITY_DN466166_c3_g3_i1	ZF-HD	216	gnl|BL_ORD_ID|269698Sopen05g016700.1 Solanum pennellii|ZF-HD|ZF-HD family protein	269698	1.33436e-27	84.2857	109.383	70	59
TRINITY_DN470634_c2_g2_i1	FAR1	208	gnl|BL_ORD_ID|199065LOC_Os04g22990.1 Oryza sativa subsp. japonica|FAR1|FAR1 family protein	199065	4.11953e-10	59.7015	58.5362	67	40
TRINITY_DN480258_c1_g2_i1	ERF	213	gnl|BL_ORD_ID|4866Achn239411 Actinidia chinensis|ERF|ERF family protein	4866	0.0360697	58.6957	34.6538	46	27
TRINITY_DN519560_c40_g3_i6	TCP	472	gnl|BL_ORD_ID|270237Sopen12g015990.1 Solanum pennellii|TCP|TCP family protein	270237	6.33776e-10	44.2623	60.8474	122	54
TRINITY_DN435641_c1_g1_i3	FAR1	262	gnl|BL_ORD_ID|199065LOC_Os04g22990.1 Oryza sativa subsp. japonica|FAR1|FAR1 family protein	199065	2.38508e-19	61.9048	86.2705	84	52
TRINITY_DN477659_c5_g3_i1	NAC	281	gnl|BL_ORD_ID|84783Do022798.1 Dichanthelium oligosanthes|NAC|NAC family protein	84783	0.00107317	64.7059	40.0466	34	22
TRINITY_DN481968_c45_g2_i3	B3	559	gnl|BL_ORD_ID|124947MLOC_64376.11 Hordeum vulgare|B3|B3 family protein	124947	1.7443e-06	46.3918	49.2914	97	45
TRINITY_DN502636_c0_g4_i1	M-type_MADS	317	gnl|BL_ORD_ID|198356LOC_Os11g12360.1 Oryza sativa subsp. japonica|M-type_MADS|M-type_MADS family protein	198356	2.69689e-23	61.165	98.5969	103	63
TRINITY_DN320579_c0_g2_i1	GRAS	252	gnl|BL_ORD_ID|296836TRIUR3_07891-P1 Triticum urartu|GRAS|GRAS family protein	296836	1.26264e-19	86.3636	85.1149	44	38
TRINITY_DN492012_c3_g8_i1	RAV	208	gnl|BL_ORD_ID|46716Bv6_128370_kakc.t1 Beta vulgaris|RAV|RAV family protein	46716	0.040009	48.2759	33.8834	58	28
TRINITY_DN519628_c11_g2_i7	M-type_MADS	317	gnl|BL_ORD_ID|198356LOC_Os11g12360.1 Oryza sativa subsp. japonica|M-type_MADS|M-type_MADS family protein	198356	1.28307e-19	66.6667	77.411	69	46
TRINITY_DN510074_c45_g1_i3	C2H2	520	gnl|BL_ORD_ID|21127EMT02428 Aegilops tauschii|C2H2|C2H2 family protein	21127	4.67757e-12	87.1795	64.3142	39	34
TRINITY_DN457706_c4_g1_i1	NAC	260	gnl|BL_ORD_ID|296846TRIUR3_11787-P1 Triticum urartu|NAC|NAC family protein	296846	1.52718e-14	79.5918	71.2478	49	39
TRINITY_DN518881_c41_g3_i1	NAC	332	gnl|BL_ORD_ID|128048Itr_sc004419.1_g00003.1 Ipomoea trifida|NAC|NAC family protein	128048	1.50197e-19	60.2041	87.8113	98	59
TRINITY_DN255739_c1_g1_i1	ZF-HD	205	gnl|BL_ORD_ID|269698Sopen05g016700.1 Solanum pennellii|ZF-HD|ZF-HD family protein	269698	5.79214e-27	85.2941	107.457	68	58
TRINITY_DN481309_c4_g2_i1	TCP	238	gnl|BL_ORD_ID|270237Sopen12g015990.1 Solanum pennellii|TCP|TCP family protein	270237	9.58805e-29	86.5672	113.235	67	58
TRINITY_DN415644_c1_g1_i1	TCP	290	gnl|BL_ORD_ID|270237Sopen12g015990.1 Solanum pennellii|TCP|TCP family protein	270237	1.02407e-12	70.9677	67.3958	62	44
TRINITY_DN178288_c1_g2_i1	C2H2	249	gnl|BL_ORD_ID|297126TRIUR3_34542-P1 Triticum urartu|C2H2|C2H2 family protein	297126	1.37487e-15	81.6327	73.9442	49	40
TRINITY_DN381927_c1_g1_i1	TCP	216	gnl|BL_ORD_ID|270237Sopen12g015990.1 Solanum pennellii|TCP|TCP family protein	270237	2.06889e-23	71.831	97.4413	71	51
TRINITY_DN425501_c0_g1_i1	G2-like	225	gnl|BL_ORD_ID|296938TRIUR3_23402-P1 Triticum urartu|G2-like|G2-like family protein	296938	0.00152781	53.9683	38.891	63	34
TRINITY_DN477185_c12_g4_i3	ZF-HD	253	gnl|BL_ORD_ID|269698Sopen05g016700.1 Solanum pennellii|ZF-HD|ZF-HD family protein	269698	5.16234e-09	55.9524	55.8398	84	47
TRINITY_DN523617_c20_g1_i1	ERF	220	gnl|BL_ORD_ID|270781Sopen11g017580.1 Solanum pennellii|ERF|ERF family protein	270781	1.71161e-07	50	50.8322	48	24
TRINITY_DN368980_c1_g1_i4	NAC	250	gnl|BL_ORD_ID|296846TRIUR3_11787-P1 Triticum urartu|NAC|NAC family protein	296846	1.33219e-13	81.8182	68.5514	44	36
TRINITY_DN518881_c41_g3_i2	ZF-HD	896	gnl|BL_ORD_ID|269698Sopen05g016700.1 Solanum pennellii|ZF-HD|ZF-HD family protein	269698	4.49419e-45	53.1034	169.474	290	154
TRINITY_DN464861_c5_g6_i1	HD-ZIP	224	gnl|BL_ORD_ID|269681Sopen09g021360.1 Solanum pennellii|HD-ZIP|HD-ZIP family protein	269681	1.84116e-16	89.7959	77.411	49	44
TRINITY_DN505465_c6_g11_i3	M-type_MADS	369	gnl|BL_ORD_ID|198356LOC_Os11g12360.1 Oryza sativa subsp. japonica|M-type_MADS|M-type_MADS family protein	198356	8.42858e-08	48.8189	53.5286	127	62
TRINITY_DN519628_c11_g8_i1	M-type_MADS	237	gnl|BL_ORD_ID|198356LOC_Os11g12360.1 Oryza sativa subsp. japonica|M-type_MADS|M-type_MADS family protein	198356	1.42915e-11	71.7391	63.1586	46	33
TRINITY_DN314329_c0_g1_i1	ZF-HD	204	gnl|BL_ORD_ID|269698Sopen05g016700.1 Solanum pennellii|ZF-HD|ZF-HD family protein	269698	1.23717e-06	68.75	48.1358	48	33
TRINITY_DN389843_c1_g1_i1	GRAS	210	gnl|BL_ORD_ID|58251C.cajan_27185 Cajanus cajan|GRAS|GRAS family protein	58251	3.64371e-07	62.069	49.6766	58	36
TRINITY_DN481320_c2_g5_i2	M-type_MADS	235	gnl|BL_ORD_ID|198356LOC_Os11g12360.1 Oryza sativa subsp. japonica|M-type_MADS|M-type_MADS family protein	198356	5.31817e-14	66.6667	70.4774	54	36
TRINITY_DN511359_c2_g2_i3	M-type_MADS	476	gnl|BL_ORD_ID|198356LOC_Os11g12360.1 Oryza sativa subsp. japonica|M-type_MADS|M-type_MADS family protein	198356	5.19546e-12	68.3333	67.0106	60	41
TRINITY_DN246481_c2_g1_i1	FAR1	215	gnl|BL_ORD_ID|199065LOC_Os04g22990.1 Oryza sativa subsp. japonica|FAR1|FAR1 family protein	199065	1.78921e-09	56.7164	56.9954	67	38
TRINITY_DN413648_c4_g1_i3	FAR1	218	gnl|BL_ORD_ID|199065LOC_Os04g22990.1 Oryza sativa subsp. japonica|FAR1|FAR1 family protein	199065	1.84111e-13	62.3188	68.5514	69	43
TRINITY_DN286936_c13_g2_i1	B3	326	gnl|BL_ORD_ID|20166EMT01685 Aegilops tauschii|B3|B3 family protein	20166	3.96692e-14	56.0976	71.633	82	46
TRINITY_DN472778_c14_g9_i1	NAC	319	gnl|BL_ORD_ID|84783Do022798.1 Dichanthelium oligosanthes|NAC|NAC family protein	84783	4.71174e-08	54.023	53.5286	87	47
TRINITY_DN484876_c8_g5_i10	TCP	405	gnl|BL_ORD_ID|270237Sopen12g015990.1 Solanum pennellii|TCP|TCP family protein	270237	3.00596e-62	85.8209	212.231	134	115
TRINITY_DN421190_c2_g3_i5	ZF-HD	261	gnl|BL_ORD_ID|269698Sopen05g016700.1 Solanum pennellii|ZF-HD|ZF-HD family protein	269698	5.05949e-07	50.6494	50.0618	77	39
TRINITY_DN501540_c4_g7_i1	HD-ZIP	203	gnl|BL_ORD_ID|269681Sopen09g021360.1 Solanum pennellii|HD-ZIP|HD-ZIP family protein	269681	1.42009e-30	88.0597	117.857	67	59
TRINITY_DN462074_c2_g3_i1	HD-ZIP	228	gnl|BL_ORD_ID|269681Sopen09g021360.1 Solanum pennellii|HD-ZIP|HD-ZIP family protein	269681	1.37361e-18	85.1351	83.5741	74	63
TRINITY_DN470535_c19_g6_i1	FAR1	227	gnl|BL_ORD_ID|199065LOC_Os04g22990.1 Oryza sativa subsp. japonica|FAR1|FAR1 family protein	199065	0.0289872	47.2727	35.039	55	26
TRINITY_DN474002_c4_g1_i2	HD-ZIP	244	gnl|BL_ORD_ID|82545Dca2137.1 Dianthus caryophyllus|HD-ZIP|HD-ZIP family protein	82545	1.37089e-15	68.4211	74.7146	57	39
TRINITY_DN523420_c3_g7_i1	M-type_MADS	239	gnl|BL_ORD_ID|198356LOC_Os11g12360.1 Oryza sativa subsp. japonica|M-type_MADS|M-type_MADS family protein	198356	0.00792901	50.8197	36.965	61	31
TRINITY_DN472271_c3_g2_i1	FAR1	306	gnl|BL_ORD_ID|82637Dca43462.1 Dianthus caryophyllus|FAR1|FAR1 family protein	82637	4.16306e-08	55.6604	53.5286	106	59
TRINITY_DN367403_c1_g1_i3	HD-ZIP	264	gnl|BL_ORD_ID|216651PH01000183G0940 Phyllostachys heterocycla|HD-ZIP|HD-ZIP family protein	216651	0.00563457	46.0526	37.3502	76	35
TRINITY_DN406233_c0_g1_i2	TCP	224	gnl|BL_ORD_ID|270237Sopen12g015990.1 Solanum pennellii|TCP|TCP family protein	270237	6.22041e-30	83.7838	116.316	74	62
TRINITY_DN449851_c0_g5_i1	M-type_MADS	265	gnl|BL_ORD_ID|198356LOC_Os11g12360.1 Oryza sativa subsp. japonica|M-type_MADS|M-type_MADS family protein	198356	1.09152e-25	70.4545	104.76	88	62
TRINITY_DN472015_c2_g4_i2	NAC	287	gnl|BL_ORD_ID|128048Itr_sc004419.1_g00003.1 Ipomoea trifida|NAC|NAC family protein	128048	6.15975e-08	57.3333	53.1434	75	43
TRINITY_DN496996_c1_g1_i4	ERF	253	gnl|BL_ORD_ID|291652XP_010556248.1 Tarenaya hassleriana|ERF|ERF family protein	291652	2.04063e-24	77.1084	100.523	83	64
TRINITY_DN502918_c5_g6_i4	ERF	600	gnl|BL_ORD_ID|291652XP_010556248.1 Tarenaya hassleriana|ERF|ERF family protein	291652	1.58916e-73	71.8593	245.743	199	143
TRINITY_DN361850_c2_g1_i1	bHLH	252	gnl|BL_ORD_ID|297244TRIUR3_29035-P1 Triticum urartu|bHLH|bHLH family protein	297244	9.04521e-05	70.2703	42.743	74	52
TRINITY_DN406932_c0_g1_i1	ERF	209	gnl|BL_ORD_ID|270781Sopen11g017580.1 Solanum pennellii|ERF|ERF family protein	270781	2.82114e-13	71.6667	67.781	60	43
TRINITY_DN334042_c0_g1_i1	GRAS	224	gnl|BL_ORD_ID|296836TRIUR3_07891-P1 Triticum urartu|GRAS|GRAS family protein	296836	8.12816e-18	90	79.7221	40	36
TRINITY_DN519560_c42_g7_i1	TCP	272	gnl|BL_ORD_ID|270237Sopen12g015990.1 Solanum pennellii|TCP|TCP family protein	270237	2.52245e-20	65.5172	89.3521	87	57
TRINITY_DN251721_c2_g1_i1	bHLH	267	gnl|BL_ORD_ID|296394TRIUR3_31817-P1 Triticum urartu|bHLH|bHLH family protein	296394	2.42112e-21	91.6667	88.9669	48	44
TRINITY_DN486801_c5_g1_i3	FAR1	207	gnl|BL_ORD_ID|199065LOC_Os04g22990.1 Oryza sativa subsp. japonica|FAR1|FAR1 family protein	199065	3.98784e-06	57.8125	46.595	64	37
TRINITY_DN510074_c57_g16_i3	G2-like	2874	gnl|BL_ORD_ID|269678Sopen11g010100.1 Solanum pennellii|G2-like|G2-like family protein	269678	8.90032e-32	55.1887	137.117	212	117
TRINITY_DN467831_c0_g5_i2	ZF-HD	248	gnl|BL_ORD_ID|269698Sopen05g016700.1 Solanum pennellii|ZF-HD|ZF-HD family protein	269698	4.9913e-06	53.1646	46.9802	79	42
TRINITY_DN464368_c6_g6_i2	FAR1	248	gnl|BL_ORD_ID|199065LOC_Os04g22990.1 Oryza sativa subsp. japonica|FAR1|FAR1 family protein	199065	8.33839e-14	59.2593	70.0922	81	48
TRINITY_DN298518_c0_g5_i1	B3	277	gnl|BL_ORD_ID|20166EMT01685 Aegilops tauschii|B3|B3 family protein	20166	6.01169e-08	53.8462	52.7582	91	49
TRINITY_DN464711_c27_g6_i1	bHLH	245	gnl|BL_ORD_ID|258656676783878 Sisymbrium irio|bHLH|bHLH family protein	258656	0.0375502	65.3061	34.6538	49	32
TRINITY_DN517165_c131_g23_i4	bHLH	1669	gnl|BL_ORD_ID|296394TRIUR3_31817-P1 Triticum urartu|bHLH|bHLH family protein	296394	5.18342e-20	95.8333	94.7449	48	46
TRINITY_DN481874_c0_g11_i1	NAC	236	gnl|BL_ORD_ID|128048Itr_sc004419.1_g00003.1 Ipomoea trifida|NAC|NAC family protein	128048	3.72509e-13	64.1975	67.781	81	52
TRINITY_DN463225_c6_g1_i3	ARF	275	gnl|BL_ORD_ID|95574462918339 Eragrostis tef|ARF|ARF family protein	95574	0.0428872	56.4103	34.6538	39	22
TRINITY_DN477924_c49_g1_i1	NAC	301	gnl|BL_ORD_ID|128048Itr_sc004419.1_g00003.1 Ipomoea trifida|NAC|NAC family protein	128048	3.82358e-19	62.3656	86.2705	93	58
TRINITY_DN383232_c0_g2_i1	Nin-like	345	gnl|BL_ORD_ID|137890Kalax.0015s0109.1.p Kalanchoe marnieriana|Nin-like|Nin-like family protein	137890	0.00822896	48.2353	37.3502	85	41
TRINITY_DN403425_c1_g1_i1	LBD	216	gnl|BL_ORD_ID|212177CCG002690.1 Populus euphratica|LBD|LBD family protein	212177	0.0347774	51.0638	34.6538	47	24
TRINITY_DN468421_c14_g2_i1	B3	320	gnl|BL_ORD_ID|124947MLOC_64376.11 Hordeum vulgare|B3|B3 family protein	124947	7.80904e-06	46.5909	45.4394	88	41
TRINITY_DN504308_c20_g2_i1	B3	317	gnl|BL_ORD_ID|20566EMT28125 Aegilops tauschii|B3|B3 family protein	20566	5.10722e-23	84.6154	95.9005	65	55
TRINITY_DN75400_c0_g2_i1	ERF	207	gnl|BL_ORD_ID|270781Sopen11g017580.1 Solanum pennellii|ERF|ERF family protein	270781	2.86883e-08	65.9091	50.447	44	29
TRINITY_DN462895_c9_g6_i7	NF-YB	253	gnl|BL_ORD_ID|296864TRIUR3_11916-P1 Triticum urartu|NF-YB|NF-YB family protein	296864	1.01927e-16	91.1765	75.8702	34	31
TRINITY_DN498129_c2_g8_i1	YABBY	212	gnl|BL_ORD_ID|258264676791140 Sisymbrium irio|YABBY|YABBY family protein	258264	6.27228e-27	84.2857	105.916	70	59
TRINITY_DN481421_c1_g6_i1	M-type_MADS	406	gnl|BL_ORD_ID|198356LOC_Os11g12360.1 Oryza sativa subsp. japonica|M-type_MADS|M-type_MADS family protein	198356	3.27007e-46	74.0741	166.007	135	100
TRINITY_DN467212_c1_g5_i1	HD-ZIP	284	gnl|BL_ORD_ID|269681Sopen09g021360.1 Solanum pennellii|HD-ZIP|HD-ZIP family protein	269681	9.68361e-41	81.9149	148.288	94	77
TRINITY_DN464613_c0_g1_i5	E2F DP	798	gnl|BL_ORD_ID|223767XP_008245529.1 Prunus mume|E2F/DP|E2F/DP family protein	223767	6.11792e-05	62.2642	47.3654	53	33
TRINITY_DN521381_c7_g1_i2	TCP	446	gnl|BL_ORD_ID|270237Sopen12g015990.1 Solanum pennellii|TCP|TCP family protein	270237	5.91082e-08	50	54.299	106	53
TRINITY_DN489990_c22_g8_i2	FAR1	345	gnl|BL_ORD_ID|199065LOC_Os04g22990.1 Oryza sativa subsp. japonica|FAR1|FAR1 family protein	199065	1.71331e-17	62.2449	82.0333	98	61
TRINITY_DN505779_c11_g2_i3	NAC	351	gnl|BL_ORD_ID|296846TRIUR3_11787-P1 Triticum urartu|NAC|NAC family protein	296846	1.50775e-17	87.234	80.8777	47	41
TRINITY_DN281285_c1_g1_i1	Trihelix	211	gnl|BL_ORD_ID|297027TRIUR3_33328-P1 Triticum urartu|Trihelix|Trihelix family protein	297027	7.98737e-11	77.4194	60.4622	62	48
TRINITY_DN467593_c63_g1_i4	FAR1	469	gnl|BL_ORD_ID|199065LOC_Os04g22990.1 Oryza sativa subsp. japonica|FAR1|FAR1 family protein	199065	1.3142e-12	61.7647	68.9366	68	42
TRINITY_DN485717_c25_g5_i3	C2H2	287	gnl|BL_ORD_ID|297126TRIUR3_34542-P1 Triticum urartu|C2H2|C2H2 family protein	297126	7.37737e-14	84.6154	69.707	39	33
TRINITY_DN493879_c31_g9_i12	NAC	954	gnl|BL_ORD_ID|296846TRIUR3_11787-P1 Triticum urartu|NAC|NAC family protein	296846	1.425e-28	90.9091	117.857	66	60
TRINITY_DN423851_c4_g1_i1	NAC	220	gnl|BL_ORD_ID|296846TRIUR3_11787-P1 Triticum urartu|NAC|NAC family protein	296846	5.62605e-20	93.75	85.8853	48	45
TRINITY_DN523569_c22_g6_i1	M-type_MADS	506	gnl|BL_ORD_ID|198356LOC_Os11g12360.1 Oryza sativa subsp. japonica|M-type_MADS|M-type_MADS family protein	198356	1.32361e-53	71.2575	188.734	167	119
TRINITY_DN399385_c2_g3_i1	bHLH	247	gnl|BL_ORD_ID|270194Sopen12g030120.1 Solanum pennellii|bHLH|bHLH family protein	270194	8.20195e-22	81.5385	93.2041	65	53
TRINITY_DN382674_c4_g1_i4	NAC	330	gnl|BL_ORD_ID|128048Itr_sc004419.1_g00003.1 Ipomoea trifida|NAC|NAC family protein	128048	6.67746e-10	48.7179	59.3066	117	57
TRINITY_DN488590_c1_g9_i1	M-type_MADS	231	gnl|BL_ORD_ID|198356LOC_Os11g12360.1 Oryza sativa subsp. japonica|M-type_MADS|M-type_MADS family protein	198356	0.000346164	52.9412	41.2022	68	36
TRINITY_DN435915_c4_g2_i1	NAC	241	gnl|BL_ORD_ID|128048Itr_sc004419.1_g00003.1 Ipomoea trifida|NAC|NAC family protein	128048	8.33207e-07	83.3333	49.2914	36	30
TRINITY_DN523746_c143_g5_i7	FAR1	1104	gnl|BL_ORD_ID|199065LOC_Os04g22990.1 Oryza sativa subsp. japonica|FAR1|FAR1 family protein	199065	1.2512e-63	65.0407	226.098	246	160
TRINITY_DN402923_c1_g1_i1	TCP	203	gnl|BL_ORD_ID|269425Sopen05g005700.1 Solanum pennellii|TCP|TCP family protein	269425	2.88449e-05	53.9683	44.2838	63	34
TRINITY_DN455320_c4_g1_i5	Trihelix	223	gnl|BL_ORD_ID|297027TRIUR3_33328-P1 Triticum urartu|Trihelix|Trihelix family protein	297027	3.40029e-28	88.4058	110.538	69	61
TRINITY_DN472271_c3_g1_i4	FAR1	676	gnl|BL_ORD_ID|82637Dca43462.1 Dianthus caryophyllus|FAR1|FAR1 family protein	82637	1.03867e-21	55.8824	97.4413	170	95
TRINITY_DN465568_c3_g2_i1	Trihelix	266	gnl|BL_ORD_ID|297027TRIUR3_33328-P1 Triticum urartu|Trihelix|Trihelix family protein	297027	2.42877e-14	67.1429	71.2478	70	47
TRINITY_DN485230_c12_g2_i1	C3H	209	gnl|BL_ORD_ID|171871XP_016440619.1 Nicotiana tabacum|C3H|C3H family protein	171871	1.3084e-09	65.3061	56.6102	49	32
TRINITY_DN515317_c36_g10_i2	NAC	626	gnl|BL_ORD_ID|20708EMT33859 Aegilops tauschii|NAC|NAC family protein	20708	4.25955e-07	57.8125	52.373	64	37
TRINITY_DN523617_c80_g19_i1	ERF	2011	gnl|BL_ORD_ID|270781Sopen11g017580.1 Solanum pennellii|ERF|ERF family protein	270781	5.44115e-72	54.3269	259.225	416	226
TRINITY_DN509685_c15_g2_i1	GRAS	222	gnl|BL_ORD_ID|296836TRIUR3_07891-P1 Triticum urartu|GRAS|GRAS family protein	296836	2.25331e-17	80.8824	78.1814	68	55
TRINITY_DN476635_c29_g8_i2	NAC	326	gnl|BL_ORD_ID|296846TRIUR3_11787-P1 Triticum urartu|NAC|NAC family protein	296846	6.30701e-17	81.25	78.9518	48	39
TRINITY_DN429160_c1_g2_i1	TCP	277	gnl|BL_ORD_ID|270237Sopen12g015990.1 Solanum pennellii|TCP|TCP family protein	270237	2.86922e-39	80.4348	144.05	92	74
TRINITY_DN380039_c1_g1_i1	ERF	259	gnl|BL_ORD_ID|270781Sopen11g017580.1 Solanum pennellii|ERF|ERF family protein	270781	8.99746e-19	69.4118	84.3445	85	59
TRINITY_DN494639_c0_g2_i1	LBD	210	gnl|BL_ORD_ID|126762Itr_sc000159.1_g00052.1 Ipomoea trifida|LBD|LBD family protein	126762	1.27217e-10	60.3175	60.077	63	38
TRINITY_DN480026_c29_g4_i1	ERF	287	gnl|BL_ORD_ID|296375TRIUR3_04273-P1 Triticum urartu|ERF|ERF family protein	296375	2.53689e-08	76.3158	53.5286	38	29
TRINITY_DN501540_c4_g5_i2	HD-ZIP	246	gnl|BL_ORD_ID|269681Sopen09g021360.1 Solanum pennellii|HD-ZIP|HD-ZIP family protein	269681	4.48575e-31	88.5714	119.783	70	62
TRINITY_DN470535_c19_g4_i1	FAR1	249	gnl|BL_ORD_ID|199065LOC_Os04g22990.1 Oryza sativa subsp. japonica|FAR1|FAR1 family protein	199065	2.57591e-10	51.3158	59.6918	76	39
TRINITY_DN478955_c38_g5_i4	FAR1	324	gnl|BL_ORD_ID|199065LOC_Os04g22990.1 Oryza sativa subsp. japonica|FAR1|FAR1 family protein	199065	1.45632e-15	54.0816	76.2554	98	53
TRINITY_DN453465_c2_g3_i1	HD-ZIP	212	gnl|BL_ORD_ID|269681Sopen09g021360.1 Solanum pennellii|HD-ZIP|HD-ZIP family protein	269681	1.33736e-17	84.2857	80.4925	70	59
TRINITY_DN517165_c132_g2_i6	FAR1	688	gnl|BL_ORD_ID|199065LOC_Os04g22990.1 Oryza sativa subsp. japonica|FAR1|FAR1 family protein	199065	5.54915e-23	49.4444	102.064	180	89
TRINITY_DN472942_c7_g1_i1	bHLH	232	gnl|BL_ORD_ID|297244TRIUR3_29035-P1 Triticum urartu|bHLH|bHLH family protein	297244	5.48712e-19	73.0769	83.1889	78	57
TRINITY_DN474002_c6_g1_i4	HD-ZIP	282	gnl|BL_ORD_ID|82545Dca2137.1 Dianthus caryophyllus|HD-ZIP|HD-ZIP family protein	82545	0.000477301	46.0317	30.4166	63	29
TRINITY_DN281158_c1_g1_i1	GRAS	229	gnl|BL_ORD_ID|94179Thhalv10006868m Eutrema salsugineum|GRAS|GRAS family protein	94179	0.0166039	59.6491	35.8094	57	34
TRINITY_DN521689_c8_g2_i8	ERF	337	gnl|BL_ORD_ID|291652XP_010556248.1 Tarenaya hassleriana|ERF|ERF family protein	291652	3.56885e-27	77.0833	109.768	96	74
TRINITY_DN425532_c0_g8_i7	ERF	308	gnl|BL_ORD_ID|291652XP_010556248.1 Tarenaya hassleriana|ERF|ERF family protein	291652	7.20536e-39	77	142.895	100	77
TRINITY_DN496937_c15_g27_i1	B3	332	gnl|BL_ORD_ID|74989PK04891.1 Cannabis sativa|B3|B3 family protein	74989	0.00254865	46.5909	38.891	88	41
TRINITY_DN314849_c0_g1_i1	bHLH	231	gnl|BL_ORD_ID|296394TRIUR3_31817-P1 Triticum urartu|bHLH|bHLH family protein	296394	2.56487e-17	97.4359	77.7962	39	38
TRINITY_DN481419_c7_g3_i4	MYB	227	gnl|BL_ORD_ID|86421EcC047949.20 Eucalyptus camaldulensis|MYB|MYB family protein	86421	0.0254023	48.6486	34.6538	74	36
TRINITY_DN514848_c58_g8_i2	NAC	220	gnl|BL_ORD_ID|296846TRIUR3_11787-P1 Triticum urartu|NAC|NAC family protein	296846	1.68204e-27	85.7143	106.301	63	54
TRINITY_DN418901_c5_g3_i1	G2-like	250	gnl|BL_ORD_ID|269678Sopen11g010100.1 Solanum pennellii|G2-like|G2-like family protein	269678	0.00943493	53.4884	36.5798	43	23
TRINITY_DN488339_c18_g5_i4	M-type_MADS	797	gnl|BL_ORD_ID|278710PGSC0003DMP400020035 Solanum tuberosum|M-type_MADS|M-type_MADS family protein	278710	0.0417394	55.7692	38.1206	52	29
TRINITY_DN444493_c6_g14_i2	G2-like	296	gnl|BL_ORD_ID|269678Sopen11g010100.1 Solanum pennellii|G2-like|G2-like family protein	269678	3.14185e-08	50.495	53.9138	101	51
TRINITY_DN460086_c0_g1_i1	ZF-HD	204	gnl|BL_ORD_ID|269698Sopen05g016700.1 Solanum pennellii|ZF-HD|ZF-HD family protein	269698	2.98389e-18	74.6269	82.4185	67	50
TRINITY_DN474002_c7_g7_i1	M-type_MADS	242	gnl|BL_ORD_ID|269835Sopen04g024410.1 Solanum pennellii|M-type_MADS|M-type_MADS family protein	269835	1.57951e-11	64.4068	62.3882	59	38
TRINITY_DN459077_c2_g1_i1	HB-other	260	gnl|BL_ORD_ID|22349AT4G02560.2 Arabidopsis thaliana|HB-other|HB-other family protein	22349	5.14746e-06	69.5652	46.9802	46	32
TRINITY_DN468108_c1_g4_i1	M-type_MADS	202	gnl|BL_ORD_ID|198356LOC_Os11g12360.1 Oryza sativa subsp. japonica|M-type_MADS|M-type_MADS family protein	198356	1.17531e-14	64.1791	71.633	67	43
TRINITY_DN486083_c2_g1_i1	B3	208	gnl|BL_ORD_ID|274858SapurV1A.0185s0330.2.p Salix purpurea|B3|B3 family protein	274858	0.0482178	54.902	33.8834	51	28
TRINITY_DN231325_c1_g1_i1	HD-ZIP	221	gnl|BL_ORD_ID|82545Dca2137.1 Dianthus caryophyllus|HD-ZIP|HD-ZIP family protein	82545	4.60795e-17	89.4737	59.3066	38	34
TRINITY_DN523883_c15_g1_i1	TCP	221	gnl|BL_ORD_ID|270237Sopen12g015990.1 Solanum pennellii|TCP|TCP family protein	270237	1.94824e-24	72.6027	100.523	73	53
TRINITY_DN502918_c5_g1_i1	HD-ZIP	210	gnl|BL_ORD_ID|269681Sopen09g021360.1 Solanum pennellii|HD-ZIP|HD-ZIP family protein	269681	4.47782e-21	72.4638	90.5077	69	50
TRINITY_DN357639_c0_g1_i1	HD-ZIP	220	gnl|BL_ORD_ID|82545Dca2137.1 Dianthus caryophyllus|HD-ZIP|HD-ZIP family protein	82545	1.88331e-09	59.4203	56.6102	69	41
TRINITY_DN477537_c0_g5_i3	TCP	324	gnl|BL_ORD_ID|311705GRMZM2G414114_P01 Zea mays|TCP|TCP family protein	311705	0.0246546	52.6316	35.8094	38	20
TRINITY_DN523486_c94_g9_i1	MYB	516	gnl|BL_ORD_ID|20187EMT20255 Aegilops tauschii|MYB|MYB family protein	20187	5.44188e-36	78.3505	132.88	97	76
TRINITY_DN523979_c13_g1_i8	FAR1	4718	gnl|BL_ORD_ID|20953EMT18279 Aegilops tauschii|FAR1|FAR1 family protein	20953	0	95.3202	734.176	406	387
TRINITY_DN489990_c22_g2_i1	FAR1	294	gnl|BL_ORD_ID|199065LOC_Os04g22990.1 Oryza sativa subsp. japonica|FAR1|FAR1 family protein	199065	1.61518e-15	60.9195	75.485	87	53
TRINITY_DN462188_c3_g1_i1	ZF-HD	216	gnl|BL_ORD_ID|269698Sopen05g016700.1 Solanum pennellii|ZF-HD|ZF-HD family protein	269698	2.22009e-07	59.6491	50.8322	57	34
TRINITY_DN478955_c38_g4_i2	FAR1	262	gnl|BL_ORD_ID|199065LOC_Os04g22990.1 Oryza sativa subsp. japonica|FAR1|FAR1 family protein	199065	0.00350571	52.1127	38.1206	71	37
TRINITY_DN523518_c43_g7_i1	Trihelix	1018	gnl|BL_ORD_ID|50223XP_004487156.1 Cicer arietinum|Trihelix|Trihelix family protein	50223	2.50434e-11	43.1907	67.781	257	111
TRINITY_DN487501_c5_g1_i1	NAC	238	gnl|BL_ORD_ID|296846TRIUR3_11787-P1 Triticum urartu|NAC|NAC family protein	296846	4.57435e-29	87.5	110.923	64	56
TRINITY_DN329244_c0_g1_i1	FAR1	235	gnl|BL_ORD_ID|21158EMT21149 Aegilops tauschii|FAR1|FAR1 family protein	21158	2.39113e-31	88.2353	119.398	68	60
TRINITY_DN514848_c58_g8_i3	NAC	558	gnl|BL_ORD_ID|296846TRIUR3_11787-P1 Triticum urartu|NAC|NAC family protein	296846	3.46338e-26	83.3333	107.071	66	55
TRINITY_DN523486_c94_g16_i1	FAR1	915	gnl|BL_ORD_ID|199065LOC_Os04g22990.1 Oryza sativa subsp. japonica|FAR1|FAR1 family protein	199065	2.80089e-51	64.7577	187.578	227	147
TRINITY_DN446409_c4_g1_i1	G2-like	206	gnl|BL_ORD_ID|269678Sopen11g010100.1 Solanum pennellii|G2-like|G2-like family protein	269678	6.22324e-11	68.4211	60.8474	57	39
TRINITY_DN494958_c13_g12_i3	MYB	331	gnl|BL_ORD_ID|125930MLOC_36343.2 Hordeum vulgare|MYB_related|MYB_related family protein	125930	0.0247116	52.7778	35.8094	72	38
TRINITY_DN517454_c33_g6_i1	WRKY	330	gnl|BL_ORD_ID|297335TRIUR3_28409-P1 Triticum urartu|WRKY|WRKY family protein	297335	0.000324321	56.6038	41.5874	53	30
TRINITY_DN498298_c2_g1_i1	C2H2	226	gnl|BL_ORD_ID|296602TRIUR3_32111-P1 Triticum urartu|C2H2|C2H2 family protein	296602	0.0173149	54.902	35.4242	51	28
TRINITY_DN477799_c7_g6_i1	TCP	232	gnl|BL_ORD_ID|270237Sopen12g015990.1 Solanum pennellii|TCP|TCP family protein	270237	0.000972731	40.6977	39.6614	86	35
TRINITY_DN499810_c13_g4_i2	MYB	290	gnl|BL_ORD_ID|20477EMT24643 Aegilops tauschii|MYB_related|MYB_related family protein	20477	2.30209e-11	89.5833	63.1586	48	43
TRINITY_DN473628_c4_g8_i1	M-type_MADS	273	gnl|BL_ORD_ID|198356LOC_Os11g12360.1 Oryza sativa subsp. japonica|M-type_MADS|M-type_MADS family protein	198356	9.90502e-15	61.9048	73.1738	84	52
TRINITY_DN478955_c37_g3_i1	FAR1	435	gnl|BL_ORD_ID|199065LOC_Os04g22990.1 Oryza sativa subsp. japonica|FAR1|FAR1 family protein	199065	0.000491818	43.9024	41.9726	82	36
TRINITY_DN523989_c20_g3_i3	FAR1	3372	gnl|BL_ORD_ID|251114Sobic.009G135300.1.p Sorghum bicolor|FAR1|FAR1 family protein	251114	0.000314834	44	48.1358	250	110
TRINITY_DN481421_c1_g1_i1	M-type_MADS	219	gnl|BL_ORD_ID|198356LOC_Os11g12360.1 Oryza sativa subsp. japonica|M-type_MADS|M-type_MADS family protein	198356	1.34192e-13	75	68.9366	56	42
TRINITY_DN370852_c1_g1_i1	FAR1	202	gnl|BL_ORD_ID|199065LOC_Os04g22990.1 Oryza sativa subsp. japonica|FAR1|FAR1 family protein	199065	2.7262e-25	80.597	102.449	67	54
TRINITY_DN489661_c3_g1_i1	ERF	210	gnl|BL_ORD_ID|291652XP_010556248.1 Tarenaya hassleriana|ERF|ERF family protein	291652	1.0069e-19	71.4286	86.2705	70	50
TRINITY_DN521689_c8_g2_i4	bHLH	242	gnl|BL_ORD_ID|270596Sopen12g030120.2 Solanum pennellii|bHLH|bHLH family protein	270596	2.35837e-22	80.5195	94.3597	77	62
TRINITY_DN490229_c9_g6_i2	G2-like	339	gnl|BL_ORD_ID|269678Sopen11g010100.1 Solanum pennellii|G2-like|G2-like family protein	269678	0.00295113	66.6667	38.891	45	30
TRINITY_DN224822_c0_g1_i2	bHLH	219	gnl|BL_ORD_ID|20362EMT03170 Aegilops tauschii|bHLH|bHLH family protein	20362	1.63595e-09	77.7778	55.4546	36	28
TRINITY_DN466304_c31_g3_i1	C2H2	390	gnl|BL_ORD_ID|297126TRIUR3_34542-P1 Triticum urartu|C2H2|C2H2 family protein	297126	1.73574e-15	91.6667	75.485	60	55
TRINITY_DN498298_c2_g7_i3	GRAS	292	gnl|BL_ORD_ID|296836TRIUR3_07891-P1 Triticum urartu|GRAS|GRAS family protein	296836	1.10774e-08	84.2105	54.6842	57	48
TRINITY_DN358341_c2_g2_i1	bHLH	267	gnl|BL_ORD_ID|296394TRIUR3_31817-P1 Triticum urartu|bHLH|bHLH family protein	296394	1.14774e-16	83.3333	76.2554	48	40
TRINITY_DN412419_c0_g1_i1	bHLH	212	gnl|BL_ORD_ID|296394TRIUR3_31817-P1 Triticum urartu|bHLH|bHLH family protein	296394	9.60169e-19	93.3333	81.2629	45	42
TRINITY_DN406932_c0_g3_i1	FAR1	218	gnl|BL_ORD_ID|21158EMT21149 Aegilops tauschii|FAR1|FAR1 family protein	21158	3.08494e-17	92.5	78.9518	40	37
TRINITY_DN381077_c0_g2_i1	B3	284	gnl|BL_ORD_ID|275234SapurV1A.0523s0270.1.p Salix purpurea|B3|B3 family protein	275234	0.00724727	46.5753	35.4242	73	34
TRINITY_DN521832_c9_g1_i1	C2H2	269	gnl|BL_ORD_ID|21127EMT02428 Aegilops tauschii|C2H2|C2H2 family protein	21127	1.68199e-06	78.3784	46.595	37	29
TRINITY_DN382674_c4_g1_i1	NAC	425	gnl|BL_ORD_ID|128048Itr_sc004419.1_g00003.1 Ipomoea trifida|NAC|NAC family protein	128048	4.43982e-18	55.5556	84.7297	126	70
TRINITY_DN448148_c2_g2_i1	M-type_MADS	241	gnl|BL_ORD_ID|198356LOC_Os11g12360.1 Oryza sativa subsp. japonica|M-type_MADS|M-type_MADS family protein	198356	1.76471e-30	84.8101	118.242	79	67
TRINITY_DN470241_c9_g8_i1	NAC	321	gnl|BL_ORD_ID|84783Do022798.1 Dichanthelium oligosanthes|NAC|NAC family protein	84783	7.05155e-10	70.4545	59.3066	44	31
TRINITY_DN341176_c0_g1_i2	FAR1	256	gnl|BL_ORD_ID|21158EMT21149 Aegilops tauschii|FAR1|FAR1 family protein	21158	9.32144e-33	82.5	123.635	80	66
TRINITY_DN485717_c25_g5_i6	C2H2	260	gnl|BL_ORD_ID|297126TRIUR3_34542-P1 Triticum urartu|C2H2|C2H2 family protein	297126	7.35954e-14	84.6154	69.3218	39	33
TRINITY_DN117348_c0_g2_i1	ERF	257	gnl|BL_ORD_ID|270781Sopen11g017580.1 Solanum pennellii|ERF|ERF family protein	270781	0.000304495	50	41.5874	70	35
TRINITY_DN428261_c0_g3_i2	NAC	222	gnl|BL_ORD_ID|296846TRIUR3_11787-P1 Triticum urartu|NAC|NAC family protein	296846	3.54871e-20	91.3043	86.2705	46	42
TRINITY_DN519560_c43_g10_i4	ERF	239	gnl|BL_ORD_ID|291652XP_010556248.1 Tarenaya hassleriana|ERF|ERF family protein	291652	4.08502e-18	85.7143	82.0333	56	48
TRINITY_DN455931_c7_g3_i2	ERF	272	gnl|BL_ORD_ID|270781Sopen11g017580.1 Solanum pennellii|ERF|ERF family protein	270781	8.05308e-23	72.2222	96.2857	90	65
TRINITY_DN468058_c3_g2_i1	M-type_MADS	222	gnl|BL_ORD_ID|198356LOC_Os11g12360.1 Oryza sativa subsp. japonica|M-type_MADS|M-type_MADS family protein	198356	7.14747e-25	82.4324	101.679	74	61
TRINITY_DN468458_c5_g2_i1	GRAS	233	gnl|BL_ORD_ID|296836TRIUR3_07891-P1 Triticum urartu|GRAS|GRAS family protein	296836	0.00681933	60	36.5798	50	30
TRINITY_DN406731_c2_g3_i1	bHLH	222	gnl|BL_ORD_ID|296394TRIUR3_31817-P1 Triticum urartu|bHLH|bHLH family protein	296394	3.51835e-15	94.2857	71.633	35	33
TRINITY_DN451020_c1_g4_i3	MYB	396	gnl|BL_ORD_ID|20477EMT24643 Aegilops tauschii|MYB_related|MYB_related family protein	20477	6.72763e-09	51.6484	56.6102	91	47
TRINITY_DN464704_c19_g5_i1	NAC	211	gnl|BL_ORD_ID|296846TRIUR3_11787-P1 Triticum urartu|NAC|NAC family protein	296846	1.9379e-22	97.6744	92.4337	43	42
TRINITY_DN456578_c20_g1_i1	NF-YB	278	gnl|BL_ORD_ID|296864TRIUR3_11916-P1 Triticum urartu|NF-YB|NF-YB family protein	296864	9.39848e-09	75	54.299	36	27
TRINITY_DN459259_c20_g4_i1	B3	333	gnl|BL_ORD_ID|20166EMT01685 Aegilops tauschii|B3|B3 family protein	20166	3.31503e-10	47.7778	60.4622	90	43
TRINITY_DN519560_c43_g8_i5	ERF	622	gnl|BL_ORD_ID|291652XP_010556248.1 Tarenaya hassleriana|ERF|ERF family protein	291652	1.05213e-87	77.2947	285.419	207	160
TRINITY_DN523883_c15_g6_i2	TCP	284	gnl|BL_ORD_ID|270237Sopen12g015990.1 Solanum pennellii|TCP|TCP family protein	270237	4.68909e-08	63.0769	53.5286	65	41
TRINITY_DN510074_c57_g16_i4	G2-like	344	gnl|BL_ORD_ID|269678Sopen11g010100.1 Solanum pennellii|G2-like|G2-like family protein	269678	5.24369e-09	53.1646	56.6102	79	42
TRINITY_DN465484_c15_g3_i3	ZF-HD	268	gnl|BL_ORD_ID|269698Sopen05g016700.1 Solanum pennellii|ZF-HD|ZF-HD family protein	269698	3.183e-11	58.427	62.7734	89	52
TRINITY_DN446581_c0_g2_i1	ZF-HD	252	gnl|BL_ORD_ID|269698Sopen05g016700.1 Solanum pennellii|ZF-HD|ZF-HD family protein	269698	7.82969e-27	75.9036	107.842	83	63
TRINITY_DN523745_c26_g1_i1	C2H2	280	gnl|BL_ORD_ID|297126TRIUR3_34542-P1 Triticum urartu|C2H2|C2H2 family protein	297126	2.12433e-18	86.1538	82.4185	65	56
TRINITY_DN422154_c7_g2_i1	Trihelix	381	gnl|BL_ORD_ID|297027TRIUR3_33328-P1 Triticum urartu|Trihelix|Trihelix family protein	297027	5.32137e-29	72.5	115.161	120	87
TRINITY_DN523883_c16_g7_i1	ERF	204	gnl|BL_ORD_ID|291652XP_010556248.1 Tarenaya hassleriana|ERF|ERF family protein	291652	2.27118e-22	75.3846	93.9745	65	49
TRINITY_DN477924_c49_g11_i2	NAC	324	gnl|BL_ORD_ID|128048Itr_sc004419.1_g00003.1 Ipomoea trifida|NAC|NAC family protein	128048	4.8438e-18	59.596	83.5741	99	59
TRINITY_DN471685_c9_g5_i2	M-type_MADS	246	gnl|BL_ORD_ID|269835Sopen04g024410.1 Solanum pennellii|M-type_MADS|M-type_MADS family protein	269835	1.81039e-10	67.7966	59.3066	59	40
TRINITY_DN381751_c0_g1_i3	ERF	219	gnl|BL_ORD_ID|270781Sopen11g017580.1 Solanum pennellii|ERF|ERF family protein	270781	3.43164e-08	70.8333	53.1434	48	34
TRINITY_DN481456_c88_g12_i1	FAR1	876	gnl|BL_ORD_ID|82637Dca43462.1 Dianthus caryophyllus|FAR1|FAR1 family protein	82637	2.8977e-35	59.8901	139.428	182	109
TRINITY_DN486962_c3_g1_i1	ERF	227	gnl|BL_ORD_ID|291652XP_010556248.1 Tarenaya hassleriana|ERF|ERF family protein	291652	1.33572e-19	74.2857	86.2705	70	52
TRINITY_DN480035_c5_g1_i1	NF-YC	244	gnl|BL_ORD_ID|263429Sme2.5_01876.1_g00001.1 Solanum melongena|NF-YC|NF-YC family protein	263429	3.26244e-12	72.2222	64.6994	54	39
TRINITY_DN494233_c22_g3_i1	ERF	555	gnl|BL_ORD_ID|20250EMT26591 Aegilops tauschii|ERF|ERF family protein	20250	2.04545e-41	90.7895	142.895	76	69
TRINITY_DN376015_c0_g1_i1	G2-like	226	gnl|BL_ORD_ID|269678Sopen11g010100.1 Solanum pennellii|G2-like|G2-like family protein	269678	1.09942e-11	72.549	63.1586	51	37
TRINITY_DN462895_c9_g6_i1	NF-YB	394	gnl|BL_ORD_ID|296864TRIUR3_11916-P1 Triticum urartu|NF-YB|NF-YB family protein	296864	4.88e-14	91.1765	70.0922	34	31
TRINITY_DN479840_c3_g1_i2	bHLH	229	gnl|BL_ORD_ID|127482Itr_sc000185.1_g00001.1 Ipomoea trifida|bHLH|bHLH family protein	127482	0.0111485	59.4595	36.1946	37	22
TRINITY_DN505411_c210_g28_i2	B3	2027	gnl|BL_ORD_ID|242048Phvul.006G100700.1 Phaseolus vulgaris|B3|B3 family protein	242048	1.42581e-06	44.3396	53.5286	106	47
TRINITY_DN481421_c1_g6_i3	M-type_MADS	351	gnl|BL_ORD_ID|198356LOC_Os11g12360.1 Oryza sativa subsp. japonica|M-type_MADS|M-type_MADS family protein	198356	2.775e-26	71.2766	107.842	94	67
TRINITY_DN510476_c4_g1_i2	M-type_MADS	486	gnl|BL_ORD_ID|198356LOC_Os11g12360.1 Oryza sativa subsp. japonica|M-type_MADS|M-type_MADS family protein	198356	2.65944e-07	57.377	52.373	61	35
TRINITY_DN505411_c210_g25_i2	FAR1	6320	gnl|BL_ORD_ID|199065LOC_Os04g22990.1 Oryza sativa subsp. japonica|FAR1|FAR1 family protein	199065	1.46587e-139	60.9349	487.649	599	365
TRINITY_DN352735_c0_g1_i1	M-type_MADS	267	gnl|BL_ORD_ID|198356LOC_Os11g12360.1 Oryza sativa subsp. japonica|M-type_MADS|M-type_MADS family protein	198356	3.67257e-14	66.1538	71.2478	65	43
TRINITY_DN467481_c7_g1_i1	TCP	282	gnl|BL_ORD_ID|270237Sopen12g015990.1 Solanum pennellii|TCP|TCP family protein	270237	2.67168e-30	83.6957	118.242	92	77
TRINITY_DN467481_c7_g2_i3	TCP	300	gnl|BL_ORD_ID|270237Sopen12g015990.1 Solanum pennellii|TCP|TCP family protein	270237	4.01056e-43	88.2979	155.606	94	83
TRINITY_DN404460_c3_g1_i2	bHLH	240	gnl|BL_ORD_ID|296394TRIUR3_31817-P1 Triticum urartu|bHLH|bHLH family protein	296394	1.78443e-21	93.75	88.9669	48	45
TRINITY_DN447189_c2_g1_i1	NAC	201	gnl|BL_ORD_ID|213127CCG028923.1 Populus euphratica|NAC|NAC family protein	213127	0.0294644	54.386	34.6538	57	31
TRINITY_DN507473_c34_g29_i1	TCP	371	gnl|BL_ORD_ID|297028TRIUR3_29014-P1 Triticum urartu|TCP|TCP family protein	297028	3.60767e-07	55.7143	50.447	70	39
TRINITY_DN519560_c43_g10_i3	TCP	698	gnl|BL_ORD_ID|270237Sopen12g015990.1 Solanum pennellii|TCP|TCP family protein	270237	1.05092e-92	86.2245	303.908	196	169
TRINITY_DN412082_c8_g7_i4	TCP	276	gnl|BL_ORD_ID|269425Sopen05g005700.1 Solanum pennellii|TCP|TCP family protein	269425	2.66489e-08	65.3846	53.9138	52	34
TRINITY_DN515649_c60_g3_i1	HRT-like	1942	gnl|BL_ORD_ID|20525EMT21368 Aegilops tauschii|HRT-like|HRT-like family protein	20525	2.46247e-05	65.9091	50.8322	44	29
TRINITY_DN455931_c0_g1_i1	FAR1	210	gnl|BL_ORD_ID|21158EMT21149 Aegilops tauschii|FAR1|FAR1 family protein	21158	2.69807e-27	86.3636	107.457	66	57
TRINITY_DN472791_c31_g1_i5	B3	378	gnl|BL_ORD_ID|286701Traes_4AS_3698CBB71.1 Triticum aestivum|B3|B3 family protein	286701	1.6407e-06	51.5625	48.9062	64	33
TRINITY_DN476991_c11_g6_i4	ZF-HD	443	gnl|BL_ORD_ID|269698Sopen05g016700.1 Solanum pennellii|ZF-HD|ZF-HD family protein	269698	3.57259e-10	44.3662	61.2326	142	63
TRINITY_DN474002_c5_g4_i1	HD-ZIP	221	gnl|BL_ORD_ID|82545Dca2137.1 Dianthus caryophyllus|HD-ZIP|HD-ZIP family protein	82545	1.21075e-30	88	117.087	75	66
TRINITY_DN519560_c43_g8_i6	TCP	771	gnl|BL_ORD_ID|270237Sopen12g015990.1 Solanum pennellii|TCP|TCP family protein	270237	4.33853e-112	79.6875	360.533	256	204
TRINITY_DN392368_c0_g1_i1	M-type_MADS	225	gnl|BL_ORD_ID|198356LOC_Os11g12360.1 Oryza sativa subsp. japonica|M-type_MADS|M-type_MADS family protein	198356	2.03524e-31	87.8378	120.553	74	65
TRINITY_DN519560_c42_g2_i1	TCP	1562	gnl|BL_ORD_ID|270237Sopen12g015990.1 Solanum pennellii|TCP|TCP family protein	270237	1.65286e-174	73.7271	548.51	491	362
TRINITY_DN495191_c3_g1_i1	ERF	284	gnl|BL_ORD_ID|291652XP_010556248.1 Tarenaya hassleriana|ERF|ERF family protein	291652	2.03783e-31	73.913	121.324	92	68
TRINITY_DN523272_c2_g2_i2	GATA	2606	gnl|BL_ORD_ID|20890EMT30068 Aegilops tauschii|GATA|GATA family protein	20890	0.000770968	51.8519	46.2098	81	42
TRINITY_DN286936_c13_g32_i1	B3	570	gnl|BL_ORD_ID|20166EMT01685 Aegilops tauschii|B3|B3 family protein	20166	4.45536e-11	61.5385	64.6994	65	40
TRINITY_DN358697_c1_g2_i1	FAR1	263	gnl|BL_ORD_ID|82637Dca43462.1 Dianthus caryophyllus|FAR1|FAR1 family protein	82637	3.80284e-07	51.3158	50.447	76	39
TRINITY_DN349636_c1_g1_i1	ERF	305	gnl|BL_ORD_ID|270781Sopen11g017580.1 Solanum pennellii|ERF|ERF family protein	270781	7.35894e-19	58.4158	85.5001	101	59
TRINITY_DN520629_c22_g1_i4	NAC	1803	gnl|BL_ORD_ID|84783Do022798.1 Dichanthelium oligosanthes|NAC|NAC family protein	84783	3.03434e-11	45.5516	69.707	281	128
TRINITY_DN279840_c0_g1_i1	FAR1	205	gnl|BL_ORD_ID|199065LOC_Os04g22990.1 Oryza sativa subsp. japonica|FAR1|FAR1 family protein	199065	7.63346e-25	76.4706	101.293	68	52
TRINITY_DN403852_c1_g1_i1	MYB	205	gnl|BL_ORD_ID|20187EMT20255 Aegilops tauschii|MYB|MYB family protein	20187	4.04375e-34	88.0597	123.25	67	59
TRINITY_DN475609_c4_g3_i5	FAR1	468	gnl|BL_ORD_ID|199065LOC_Os04g22990.1 Oryza sativa subsp. japonica|FAR1|FAR1 family protein	199065	1.08643e-41	64.7436	154.066	156	101
TRINITY_DN477537_c0_g1_i1	FAR1	229	gnl|BL_ORD_ID|313367Zosma45g00810.1 Zostera marina|FAR1|FAR1 family protein	313367	0.000322578	52.6316	40.817	38	20
TRINITY_DN444473_c1_g1_i3	NAC	287	gnl|BL_ORD_ID|20269EMT14186 Aegilops tauschii|NAC|NAC family protein	20269	5.88412e-05	64.5833	42.743	48	31
TRINITY_DN502636_c0_g1_i1	M-type_MADS	626	gnl|BL_ORD_ID|198356LOC_Os11g12360.1 Oryza sativa subsp. japonica|M-type_MADS|M-type_MADS family protein	198356	5.92265e-17	50	71.633	142	71
TRINITY_DN464429_c13_g3_i1	FAR1	292	gnl|BL_ORD_ID|199065LOC_Os04g22990.1 Oryza sativa subsp. japonica|FAR1|FAR1 family protein	199065	4.99191e-07	50	50.447	94	47
TRINITY_DN455121_c0_g6_i1	ZF-HD	209	gnl|BL_ORD_ID|269698Sopen05g016700.1 Solanum pennellii|ZF-HD|ZF-HD family protein	269698	3.89876e-25	88.8889	102.449	63	56
TRINITY_DN316361_c2_g1_i1	GATA	308	gnl|BL_ORD_ID|295738Tp57577_TGAC_v2_mRNA2411 Trifolium pratense|GATA|GATA family protein	295738	0.0361922	47.1698	35.039	53	25
TRINITY_DN405416_c1_g1_i1	ZF-HD	372	gnl|BL_ORD_ID|269698Sopen05g016700.1 Solanum pennellii|ZF-HD|ZF-HD family protein	269698	8.51082e-22	65.3846	95.1301	104	68
TRINITY_DN357639_c0_g7_i1	HD-ZIP	234	gnl|BL_ORD_ID|82545Dca2137.1 Dianthus caryophyllus|HD-ZIP|HD-ZIP family protein	82545	2.95098e-07	58.209	50.0618	67	39
TRINITY_DN481456_c88_g9_i2	ZF-HD	1838	gnl|BL_ORD_ID|269698Sopen05g016700.1 Solanum pennellii|ZF-HD|ZF-HD family protein	269698	5.16732e-18	65.3846	92.0485	104	68
TRINITY_DN517165_c131_g3_i2	bHLH	205	gnl|BL_ORD_ID|296394TRIUR3_31817-P1 Triticum urartu|bHLH|bHLH family protein	296394	2.36628e-21	91.6667	88.1965	48	44
TRINITY_DN449360_c1_g5_i1	MYB	268	gnl|BL_ORD_ID|20477EMT24643 Aegilops tauschii|MYB_related|MYB_related family protein	20477	1.30267e-07	88.3721	51.6026	43	38
TRINITY_DN519628_c11_g5_i1	M-type_MADS	328	gnl|BL_ORD_ID|198356LOC_Os11g12360.1 Oryza sativa subsp. japonica|M-type_MADS|M-type_MADS family protein	198356	2.3275e-13	62.7119	69.707	59	37
TRINITY_DN466750_c5_g1_i1	C2H2	273	gnl|BL_ORD_ID|297126TRIUR3_34542-P1 Triticum urartu|C2H2|C2H2 family protein	297126	1.97243e-14	83.7209	70.8626	43	36
TRINITY_DN453475_c1_g1_i1	ERF	215	gnl|BL_ORD_ID|291652XP_010556248.1 Tarenaya hassleriana|ERF|ERF family protein	291652	3.3918e-24	80.2817	99.3673	71	57
TRINITY_DN471685_c9_g5_i1	M-type_MADS	202	gnl|BL_ORD_ID|269835Sopen04g024410.1 Solanum pennellii|M-type_MADS|M-type_MADS family protein	269835	1.0734e-08	64.4068	53.5286	59	38
TRINITY_DN195482_c1_g1_i1	bHLH	232	gnl|BL_ORD_ID|296394TRIUR3_31817-P1 Triticum urartu|bHLH|bHLH family protein	296394	4.02536e-22	91.6667	90.5077	48	44
TRINITY_DN456666_c10_g7_i2	MYB	209	gnl|BL_ORD_ID|231632Pta007218 Pinus taeda|MYB|MYB family protein	231632	0.0113948	54.5455	35.8094	55	30
TRINITY_DN490843_c13_g6_i1	FAR1	278	gnl|BL_ORD_ID|199065LOC_Os04g22990.1 Oryza sativa subsp. japonica|FAR1|FAR1 family protein	199065	1.11577e-24	69.7674	102.064	86	60
TRINITY_DN466509_c26_g11_i1	Trihelix	476	gnl|BL_ORD_ID|297027TRIUR3_33328-P1 Triticum urartu|Trihelix|Trihelix family protein	297027	1.0099e-18	95.5556	86.6557	45	43
TRINITY_DN464429_c13_g25_i1	FAR1	505	gnl|BL_ORD_ID|199065LOC_Os04g22990.1 Oryza sativa subsp. japonica|FAR1|FAR1 family protein	199065	6.10442e-16	50	79.337	138	69
TRINITY_DN521195_c1_g5_i2	M-type_MADS	536	gnl|BL_ORD_ID|198356LOC_Os11g12360.1 Oryza sativa subsp. japonica|M-type_MADS|M-type_MADS family protein	198356	5.78986e-28	56.3953	115.161	172	97
TRINITY_DN523486_c94_g14_i1	FAR1	231	gnl|BL_ORD_ID|199065LOC_Os04g22990.1 Oryza sativa subsp. japonica|FAR1|FAR1 family protein	199065	9.76136e-28	75.6757	110.153	74	56
TRINITY_DN523402_c11_g7_i1	M-type_MADS	315	gnl|BL_ORD_ID|198356LOC_Os11g12360.1 Oryza sativa subsp. japonica|M-type_MADS|M-type_MADS family protein	198356	1.3653e-06	46.729	49.2914	107	50
TRINITY_DN523486_c84_g1_i2	NAC	207	gnl|BL_ORD_ID|296846TRIUR3_11787-P1 Triticum urartu|NAC|NAC family protein	296846	0.0277311	46.5517	34.6538	58	27
TRINITY_DN467392_c4_g1_i1	MYB	306	gnl|BL_ORD_ID|304308GSVIVT01024357001 Vitis vinifera|MYB|MYB family protein	304308	2.41852e-05	54.023	45.0542	87	47
TRINITY_DN437687_c2_g1_i1	NAC	203	gnl|BL_ORD_ID|296846TRIUR3_11787-P1 Triticum urartu|NAC|NAC family protein	296846	1.04476e-13	78.5714	68.1662	42	33
TRINITY_DN481456_c88_g18_i1	FAR1	925	gnl|BL_ORD_ID|82637Dca43462.1 Dianthus caryophyllus|FAR1|FAR1 family protein	82637	8.01121e-38	58.9109	147.132	202	119
TRINITY_DN472585_c5_g2_i2	M-type_MADS	280	gnl|BL_ORD_ID|198356LOC_Os11g12360.1 Oryza sativa subsp. japonica|M-type_MADS|M-type_MADS family protein	198356	1.82283e-31	80.2198	121.709	91	73
TRINITY_DN424957_c1_g2_i2	G2-like	258	gnl|BL_ORD_ID|269678Sopen11g010100.1 Solanum pennellii|G2-like|G2-like family protein	269678	8.70649e-10	53.1646	58.151	79	42
TRINITY_DN467481_c7_g2_i2	TCP	268	gnl|BL_ORD_ID|270237Sopen12g015990.1 Solanum pennellii|TCP|TCP family protein	270237	1.51927e-35	86.747	133.265	83	72
TRINITY_DN479009_c21_g6_i1	HD-ZIP	361	gnl|BL_ORD_ID|216651PH01000183G0940 Phyllostachys heterocycla|HD-ZIP|HD-ZIP family protein	216651	0.000251181	51.5152	42.3578	66	34
TRINITY_DN409620_c0_g2_i1	FAR1	240	gnl|BL_ORD_ID|82637Dca43462.1 Dianthus caryophyllus|FAR1|FAR1 family protein	82637	1.36692e-14	63.4146	72.0182	82	52
TRINITY_DN195482_c1_g3_i1	bHLH	239	gnl|BL_ORD_ID|296394TRIUR3_31817-P1 Triticum urartu|bHLH|bHLH family protein	296394	7.84972e-23	93.75	92.8189	48	45
TRINITY_DN472585_c5_g12_i1	M-type_MADS	207	gnl|BL_ORD_ID|198356LOC_Os11g12360.1 Oryza sativa subsp. japonica|M-type_MADS|M-type_MADS family protein	198356	1.53287e-20	74.6269	88.9669	67	50
TRINITY_DN463225_c6_g1_i1	ARF	255	gnl|BL_ORD_ID|95574462918339 Eragrostis tef|ARF|ARF family protein	95574	0.0290207	56.4103	35.039	39	22
TRINITY_DN320579_c0_g2_i2	GRAS	278	gnl|BL_ORD_ID|296836TRIUR3_07891-P1 Triticum urartu|GRAS|GRAS family protein	296836	4.75055e-20	84.3373	86.6557	83	70
TRINITY_DN303173_c0_g1_i1	MYB	201	gnl|BL_ORD_ID|304308GSVIVT01024357001 Vitis vinifera|MYB|MYB family protein	304308	0.000165832	64.2857	41.5874	42	27
TRINITY_DN469224_c5_g1_i1	C3H	208	gnl|BL_ORD_ID|171871XP_016440619.1 Nicotiana tabacum|C3H|C3H family protein	171871	0.000360272	51.9231	40.817	52	27
TRINITY_DN521381_c7_g3_i1	FAR1	244	gnl|BL_ORD_ID|302199Vradi0259s00080.1 Vigna radiata|FAR1|FAR1 family protein	302199	0.000126536	52.6316	41.9726	57	30
TRINITY_DN482909_c1_g7_i2	HSF	242	gnl|BL_ORD_ID|46484Bv3_065440_fztq.t1 Beta vulgaris|HSF|HSF family protein	46484	0.00548772	50	37.3502	52	26
TRINITY_DN476991_c12_g1_i1	B3	214	gnl|BL_ORD_ID|269643Sopen03g007470.1 Solanum pennellii|B3|B3 family protein	269643	0.000424333	43.3962	40.4318	53	23
TRINITY_DN412374_c1_g1_i3	FAR1	252	gnl|BL_ORD_ID|199065LOC_Os04g22990.1 Oryza sativa subsp. japonica|FAR1|FAR1 family protein	199065	1.57039e-07	57.1429	51.6026	63	36
TRINITY_DN471337_c5_g2_i2	NAC	363	gnl|BL_ORD_ID|128048Itr_sc004419.1_g00003.1 Ipomoea trifida|NAC|NAC family protein	128048	9.80281e-07	58.1081	50.0618	74	43
TRINITY_DN329844_c0_g2_i2	ERF	261	gnl|BL_ORD_ID|270781Sopen11g017580.1 Solanum pennellii|ERF|ERF family protein	270781	1.13581e-17	60.7143	81.2629	84	51
TRINITY_DN475716_c7_g1_i3	M-type_MADS	343	gnl|BL_ORD_ID|11872Araha.16643s0001.1.p Arabidopsis halleri|M-type_MADS|M-type_MADS family protein	11872	0.0208836	64.1026	36.1946	39	25
TRINITY_DN488766_c14_g1_i1	bHLH	249	gnl|BL_ORD_ID|296394TRIUR3_31817-P1 Triticum urartu|bHLH|bHLH family protein	296394	8.66585e-22	95.8333	90.1225	48	46
TRINITY_DN465484_c17_g7_i1	B3	324	gnl|BL_ORD_ID|269643Sopen03g007470.1 Solanum pennellii|B3|B3 family protein	269643	1.35297e-21	54.3689	93.2041	103	56
TRINITY_DN294736_c0_g1_i2	CAMTA	249	gnl|BL_ORD_ID|37397XP_013591879.1 Brassica oleracea|CAMTA|CAMTA family protein	37397	0.0304754	50.9434	35.039	53	27
TRINITY_DN492965_c132_g5_i2	FAR1	1855	gnl|BL_ORD_ID|199065LOC_Os04g22990.1 Oryza sativa subsp. japonica|FAR1|FAR1 family protein	199065	1.2489e-24	53.6585	113.235	205	110
TRINITY_DN315205_c2_g1_i1	CPP	204	gnl|BL_ORD_ID|268587Sp_109940_nnud.t1 Spinacia oleracea|CPP|CPP family protein	268587	0.0306965	67.5676	34.6538	37	25
TRINITY_DN498427_c31_g27_i1	MYB	278	gnl|BL_ORD_ID|51247Csa05g013080.1 Camelina sativa|MYB|MYB family protein	51247	1.04742e-06	53.9326	48.9062	89	48
TRINITY_DN477924_c54_g1_i3	FAR1	1303	gnl|BL_ORD_ID|199065LOC_Os04g22990.1 Oryza sativa subsp. japonica|FAR1|FAR1 family protein	199065	9.67747e-38	72.4638	151.754	138	100
TRINITY_DN460630_c9_g1_i2	TCP	294	gnl|BL_ORD_ID|270237Sopen12g015990.1 Solanum pennellii|TCP|TCP family protein	270237	8.39738e-25	65.625	102.449	96	63
TRINITY_DN522088_c117_g4_i3	B3	1760	gnl|BL_ORD_ID|20556EMT22877 Aegilops tauschii|B3|B3 family protein	20556	6.71266e-06	50.6667	50.447	75	38
TRINITY_DN523759_c16_g2_i2	TCP	2180	gnl|BL_ORD_ID|270237Sopen12g015990.1 Solanum pennellii|TCP|TCP family protein	270237	2.14129e-12	46.6667	74.3294	180	84
TRINITY_DN469224_c4_g2_i1	ZF-HD	220	gnl|BL_ORD_ID|269698Sopen05g016700.1 Solanum pennellii|ZF-HD|ZF-HD family protein	269698	0.0306799	47.8261	35.039	69	33
TRINITY_DN499810_c12_g1_i1	HB-other	438	gnl|BL_ORD_ID|297245TRIUR3_32002-P1 Triticum urartu|HB-other|HB-other family protein	297245	2.79213e-09	56.8966	55.4546	58	33
TRINITY_DN112876_c0_g1_i1	ERF	235	gnl|BL_ORD_ID|270781Sopen11g017580.1 Solanum pennellii|ERF|ERF family protein	270781	2.32716e-12	59.5238	51.2174	42	25
TRINITY_DN487252_c15_g1_i1	bHLH	205	gnl|BL_ORD_ID|20455EMT16496 Aegilops tauschii|bHLH|bHLH family protein	20455	1.07317e-07	73.6842	51.2174	38	28
TRINITY_DN266211_c0_g1_i2	ZF-HD	218	gnl|BL_ORD_ID|269698Sopen05g016700.1 Solanum pennellii|ZF-HD|ZF-HD family protein	269698	4.42092e-28	83.0986	110.923	71	59
TRINITY_DN518200_c44_g6_i1	bHLH	328	gnl|BL_ORD_ID|296982TRIUR3_16897-P1 Triticum urartu|bHLH|bHLH family protein	296982	9.30769e-18	71.4286	78.1814	63	45
TRINITY_DN475609_c4_g2_i1	FAR1	228	gnl|BL_ORD_ID|199065LOC_Os04g22990.1 Oryza sativa subsp. japonica|FAR1|FAR1 family protein	199065	1.21789e-27	77.3333	109.768	75	58
[truncated: 66 more rows]

## Sheet: 2. C2vs.C5
Sequence name	Sequence desc.	Sequence length	Hit desc.	Hit ACC	E-Value	Similarity	Bit-Score	Alignment length	Positives
TRINITY_DN324438_c11_g1_i6	CAMTA	213	gnl|BL_ORD_ID|38170XP_009105129.1 Brassica rapa|CAMTA|CAMTA family protein	38170	0.0387093	52	34.6538	50	26
TRINITY_DN494233_c22_g3_i2	ERF	584	gnl|BL_ORD_ID|20250EMT26591 Aegilops tauschii|ERF|ERF family protein	20250	5.50005e-40	90.7895	139.428	76	69
TRINITY_DN397711_c18_g7_i1	Trihelix	530	gnl|BL_ORD_ID|297027TRIUR3_33328-P1 Triticum urartu|Trihelix|Trihelix family protein	297027	1.87664e-09	61.6667	59.3066	60	37
TRINITY_DN465484_c15_g1_i1	NAC	238	gnl|BL_ORD_ID|128048Itr_sc004419.1_g00003.1 Ipomoea trifida|NAC|NAC family protein	128048	1.46089e-11	55.8442	63.1586	77	43
TRINITY_DN480026_c29_g15_i1	ERF	741	gnl|BL_ORD_ID|296375TRIUR3_04273-P1 Triticum urartu|ERF|ERF family protein	296375	5.69395e-33	84	128.257	75	63
TRINITY_DN485717_c25_g2_i3	NAC	389	gnl|BL_ORD_ID|296846TRIUR3_11787-P1 Triticum urartu|NAC|NAC family protein	296846	8.7618e-14	81.3953	70.4774	43	35
TRINITY_DN178485_c4_g1_i1	FAR1	274	gnl|BL_ORD_ID|199065LOC_Os04g22990.1 Oryza sativa subsp. japonica|FAR1|FAR1 family protein	199065	1.18538e-15	63.7363	75.8702	91	58
TRINITY_DN468788_c5_g3_i4	NAC	371	gnl|BL_ORD_ID|128048Itr_sc004419.1_g00003.1 Ipomoea trifida|NAC|NAC family protein	128048	3.72196e-11	53.8462	63.5438	117	63
TRINITY_DN454882_c4_g3_i1	NAC	292	gnl|BL_ORD_ID|296846TRIUR3_11787-P1 Triticum urartu|NAC|NAC family protein	296846	1.02307e-12	75	66.2402	48	36
TRINITY_DN518881_c41_g11_i3	NAC	1236	gnl|BL_ORD_ID|128048Itr_sc004419.1_g00003.1 Ipomoea trifida|NAC|NAC family protein	128048	4.4382e-26	59.375	115.161	160	95
TRINITY_DN467593_c63_g3_i4	FAR1	763	gnl|BL_ORD_ID|199065LOC_Os04g22990.1 Oryza sativa subsp. japonica|FAR1|FAR1 family protein	199065	1.70973e-13	54.3307	73.1738	127	69
TRINITY_DN517165_c131_g23_i3	C2H2	1175	gnl|BL_ORD_ID|297126TRIUR3_34542-P1 Triticum urartu|C2H2|C2H2 family protein	297126	3.90218e-07	63.5417	55.0694	96	61
TRINITY_DN180552_c1_g1_i2	bHLH	239	gnl|BL_ORD_ID|296394TRIUR3_31817-P1 Triticum urartu|bHLH|bHLH family protein	296394	1.93258e-18	95	80.8777	40	38
TRINITY_DN405524_c0_g2_i1	bHLH	296	gnl|BL_ORD_ID|286512Traes_5BL_AAC9C7238.2 Triticum aestivum|bHLH|bHLH family protein	286512	0.0320296	53.7037	35.4242	54	29
TRINITY_DN482412_c10_g5_i3	MYB	357	gnl|BL_ORD_ID|20187EMT20255 Aegilops tauschii|MYB|MYB family protein	20187	1.99973e-14	80	71.2478	45	36
TRINITY_DN523420_c3_g13_i1	M-type_MADS	273	gnl|BL_ORD_ID|198356LOC_Os11g12360.1 Oryza sativa subsp. japonica|M-type_MADS|M-type_MADS family protein	198356	2.75135e-10	56.1798	60.077	89	50
TRINITY_DN225784_c1_g1_i1	FAR1	244	gnl|BL_ORD_ID|199065LOC_Os04g22990.1 Oryza sativa subsp. japonica|FAR1|FAR1 family protein	199065	1.21901e-13	67.9487	69.3218	78	53
TRINITY_DN517165_c131_g10_i1	bHLH	368	gnl|BL_ORD_ID|296394TRIUR3_31817-P1 Triticum urartu|bHLH|bHLH family protein	296394	1.7775e-21	93.75	90.8929	48	45
TRINITY_DN488918_c6_g4_i11	C2H2	243	gnl|BL_ORD_ID|297126TRIUR3_34542-P1 Triticum urartu|C2H2|C2H2 family protein	297126	1.61993e-12	80	65.0846	40	32
TRINITY_DN518200_c44_g6_i1	bHLH	328	gnl|BL_ORD_ID|296982TRIUR3_16897-P1 Triticum urartu|bHLH|bHLH family protein	296982	9.30769e-18	71.4286	78.1814	63	45
TRINITY_DN479570_c4_g4_i1	ZF-HD	314	gnl|BL_ORD_ID|269698Sopen05g016700.1 Solanum pennellii|ZF-HD|ZF-HD family protein	269698	1.05216e-07	60.5634	52.7582	71	43
TRINITY_DN477924_c54_g1_i3	FAR1	1303	gnl|BL_ORD_ID|199065LOC_Os04g22990.1 Oryza sativa subsp. japonica|FAR1|FAR1 family protein	199065	9.67747e-38	72.4638	151.754	138	100
TRINITY_DN494233_c22_g6_i1	ERF	745	gnl|BL_ORD_ID|20250EMT26591 Aegilops tauschii|ERF|ERF family protein	20250	4.23034e-14	92.8571	70.8626	70	65
TRINITY_DN499810_c12_g1_i1	HB-other	438	gnl|BL_ORD_ID|297245TRIUR3_32002-P1 Triticum urartu|HB-other|HB-other family protein	297245	2.79213e-09	56.8966	55.4546	58	33
TRINITY_DN432256_c10_g4_i1	FAR1	371	gnl|BL_ORD_ID|199065LOC_Os04g22990.1 Oryza sativa subsp. japonica|FAR1|FAR1 family protein	199065	0.00157591	58.8235	40.0466	34	20
TRINITY_DN482412_c10_g5_i2	MYB	355	gnl|BL_ORD_ID|20187EMT20255 Aegilops tauschii|MYB|MYB family protein	20187	1.99973e-14	80	71.2478	45	36
TRINITY_DN465484_c17_g7_i1	B3	324	gnl|BL_ORD_ID|269643Sopen03g007470.1 Solanum pennellii|B3|B3 family protein	269643	1.35297e-21	54.3689	93.2041	103	56
TRINITY_DN492965_c132_g5_i2	FAR1	1855	gnl|BL_ORD_ID|199065LOC_Os04g22990.1 Oryza sativa subsp. japonica|FAR1|FAR1 family protein	199065	1.2489e-24	53.6585	113.235	205	110
TRINITY_DN515649_c60_g7_i1	NAC	1007	gnl|BL_ORD_ID|84783Do022798.1 Dichanthelium oligosanthes|NAC|NAC family protein	84783	3.23647e-09	47.9339	61.6178	121	58
TRINITY_DN495303_c5_g1_i1	NAC	257	gnl|BL_ORD_ID|296846TRIUR3_11787-P1 Triticum urartu|NAC|NAC family protein	296846	1.28919e-10	82.8571	60.077	35	29
TRINITY_DN479009_c21_g6_i1	HD-ZIP	361	gnl|BL_ORD_ID|216651PH01000183G0940 Phyllostachys heterocycla|HD-ZIP|HD-ZIP family protein	216651	0.000251181	51.5152	42.3578	66	34
TRINITY_DN498427_c31_g27_i1	MYB	278	gnl|BL_ORD_ID|51247Csa05g013080.1 Camelina sativa|MYB|MYB family protein	51247	1.04742e-06	53.9326	48.9062	89	48
TRINITY_DN464429_c13_g25_i1	FAR1	505	gnl|BL_ORD_ID|199065LOC_Os04g22990.1 Oryza sativa subsp. japonica|FAR1|FAR1 family protein	199065	6.10442e-16	50	79.337	138	69
TRINITY_DN466509_c26_g11_i1	Trihelix	476	gnl|BL_ORD_ID|297027TRIUR3_33328-P1 Triticum urartu|Trihelix|Trihelix family protein	297027	1.0099e-18	95.5556	86.6557	45	43
TRINITY_DN443956_c0_g1_i1	NF-YA	226	gnl|BL_ORD_ID|269338Sopen02g006770.1 Solanum pennellii|NF-YA|NF-YA family protein	269338	0.000240866	48.1928	41.5874	83	40
TRINITY_DN488766_c14_g1_i1	bHLH	249	gnl|BL_ORD_ID|296394TRIUR3_31817-P1 Triticum urartu|bHLH|bHLH family protein	296394	8.66585e-22	95.8333	90.1225	48	46
TRINITY_DN487252_c15_g1_i1	bHLH	205	gnl|BL_ORD_ID|20455EMT16496 Aegilops tauschii|bHLH|bHLH family protein	20455	1.07317e-07	73.6842	51.2174	38	28
TRINITY_DN468710_c13_g4_i1	GRAS	260	gnl|BL_ORD_ID|297067TRIUR3_03541-P1 Triticum urartu|GRAS|GRAS family protein	297067	7.56486e-13	97.1429	66.2402	35	34
TRINITY_DN520520_c84_g19_i3	Trihelix	2302	gnl|BL_ORD_ID|297027TRIUR3_33328-P1 Triticum urartu|Trihelix|Trihelix family protein	297027	2.11134e-50	74.5665	192.586	173	129
TRINITY_DN523630_c6_g4_i1	NAC	786	gnl|BL_ORD_ID|286338Traes_3DS_E799374CA.1 Triticum aestivum|NAC|NAC family protein	286338	2.23025e-29	77.381	112.464	84	65
TRINITY_DN471337_c5_g2_i2	NAC	363	gnl|BL_ORD_ID|128048Itr_sc004419.1_g00003.1 Ipomoea trifida|NAC|NAC family protein	128048	9.80281e-07	58.1081	50.0618	74	43
TRINITY_DN520629_c22_g2_i1	bHLH	1926	gnl|BL_ORD_ID|20455EMT16496 Aegilops tauschii|bHLH|bHLH family protein	20455	5.71158e-07	73.6842	56.225	38	28
TRINITY_DN444936_c6_g1_i1	M-type_MADS	215	gnl|BL_ORD_ID|198356LOC_Os11g12360.1 Oryza sativa subsp. japonica|M-type_MADS|M-type_MADS family protein	198356	0.00648067	60.9756	36.965	41	25
TRINITY_DN477924_c49_g11_i2	NAC	324	gnl|BL_ORD_ID|128048Itr_sc004419.1_g00003.1 Ipomoea trifida|NAC|NAC family protein	128048	4.8438e-18	59.596	83.5741	99	59
TRINITY_DN382674_c4_g1_i1	NAC	425	gnl|BL_ORD_ID|128048Itr_sc004419.1_g00003.1 Ipomoea trifida|NAC|NAC family protein	128048	4.43982e-18	55.5556	84.7297	126	70
TRINITY_DN476991_c12_g1_i1	B3	214	gnl|BL_ORD_ID|269643Sopen03g007470.1 Solanum pennellii|B3|B3 family protein	269643	0.000424333	43.3962	40.4318	53	23
TRINITY_DN523486_c84_g1_i2	NAC	207	gnl|BL_ORD_ID|296846TRIUR3_11787-P1 Triticum urartu|NAC|NAC family protein	296846	0.0277311	46.5517	34.6538	58	27
TRINITY_DN469224_c4_g2_i1	ZF-HD	220	gnl|BL_ORD_ID|269698Sopen05g016700.1 Solanum pennellii|ZF-HD|ZF-HD family protein	269698	0.0306799	47.8261	35.039	69	33
TRINITY_DN422154_c7_g2_i1	Trihelix	381	gnl|BL_ORD_ID|297027TRIUR3_33328-P1 Triticum urartu|Trihelix|Trihelix family protein	297027	5.32137e-29	72.5	115.161	120	87
TRINITY_DN519360_c21_g2_i1	M-type_MADS	572	gnl|BL_ORD_ID|198356LOC_Os11g12360.1 Oryza sativa subsp. japonica|M-type_MADS|M-type_MADS family protein	198356	1.21861e-22	50.5618	99.7525	178	90
TRINITY_DN449360_c1_g5_i1	MYB	268	gnl|BL_ORD_ID|20477EMT24643 Aegilops tauschii|MYB_related|MYB_related family protein	20477	1.30267e-07	88.3721	51.6026	43	38
TRINITY_DN522088_c117_g4_i3	B3	1760	gnl|BL_ORD_ID|20556EMT22877 Aegilops tauschii|B3|B3 family protein	20556	6.71266e-06	50.6667	50.447	75	38
TRINITY_DN464429_c13_g3_i1	FAR1	292	gnl|BL_ORD_ID|199065LOC_Os04g22990.1 Oryza sativa subsp. japonica|FAR1|FAR1 family protein	199065	4.99191e-07	50	50.447	94	47
TRINITY_DN494078_c2_g9_i1	ERF	206	gnl|BL_ORD_ID|270781Sopen11g017580.1 Solanum pennellii|ERF|ERF family protein	270781	1.30386e-10	57.377	60.077	61	35
TRINITY_DN462895_c9_g6_i2	NF-YB	394	gnl|BL_ORD_ID|296864TRIUR3_11916-P1 Triticum urartu|NF-YB|NF-YB family protein	296864	4.88e-14	91.1765	70.0922	34	31
TRINITY_DN437687_c2_g1_i1	NAC	203	gnl|BL_ORD_ID|296846TRIUR3_11787-P1 Triticum urartu|NAC|NAC family protein	296846	1.04476e-13	78.5714	68.1662	42	33
TRINITY_DN465484_c15_g3_i3	ZF-HD	268	gnl|BL_ORD_ID|269698Sopen05g016700.1 Solanum pennellii|ZF-HD|ZF-HD family protein	269698	3.183e-11	58.427	62.7734	89	52
TRINITY_DN459259_c20_g4_i1	B3	333	gnl|BL_ORD_ID|20166EMT01685 Aegilops tauschii|B3|B3 family protein	20166	3.31503e-10	47.7778	60.4622	90	43
TRINITY_DN485717_c25_g1_i1	C3H	280	gnl|BL_ORD_ID|254646Sphfalx0047s0134.1.p Sphagnum fallax|C3H|C3H family protein	254646	0.0339236	46.7742	35.039	62	29
TRINITY_DN444473_c1_g1_i3	NAC	287	gnl|BL_ORD_ID|20269EMT14186 Aegilops tauschii|NAC|NAC family protein	20269	5.88412e-05	64.5833	42.743	48	31
TRINITY_DN469545_c2_g9_i2	ZF-HD	269	gnl|BL_ORD_ID|269698Sopen05g016700.1 Solanum pennellii|ZF-HD|ZF-HD family protein	269698	1.61769e-17	71.6216	81.2629	74	53
TRINITY_DN472791_c31_g1_i5	B3	378	gnl|BL_ORD_ID|286701Traes_4AS_3698CBB71.1 Triticum aestivum|B3|B3 family protein	286701	1.6407e-06	51.5625	48.9062	64	33
TRINITY_DN465568_c3_g2_i1	Trihelix	266	gnl|BL_ORD_ID|297027TRIUR3_33328-P1 Triticum urartu|Trihelix|Trihelix family protein	297027	2.42877e-14	67.1429	71.2478	70	47
TRINITY_DN505411_c210_g25_i2	FAR1	6320	gnl|BL_ORD_ID|199065LOC_Os04g22990.1 Oryza sativa subsp. japonica|FAR1|FAR1 family protein	199065	1.46587e-139	60.9349	487.649	599	365
TRINITY_DN286936_c13_g32_i1	B3	570	gnl|BL_ORD_ID|20166EMT01685 Aegilops tauschii|B3|B3 family protein	20166	4.45536e-11	61.5385	64.6994	65	40
TRINITY_DN489990_c22_g2_i1	FAR1	294	gnl|BL_ORD_ID|199065LOC_Os04g22990.1 Oryza sativa subsp. japonica|FAR1|FAR1 family protein	199065	1.61518e-15	60.9195	75.485	87	53
TRINITY_DN476991_c11_g6_i4	ZF-HD	443	gnl|BL_ORD_ID|269698Sopen05g016700.1 Solanum pennellii|ZF-HD|ZF-HD family protein	269698	3.57259e-10	44.3662	61.2326	142	63
TRINITY_DN514848_c58_g8_i3	NAC	558	gnl|BL_ORD_ID|296846TRIUR3_11787-P1 Triticum urartu|NAC|NAC family protein	296846	3.46338e-26	83.3333	107.071	66	55
TRINITY_DN469224_c5_g1_i1	C3H	208	gnl|BL_ORD_ID|171871XP_016440619.1 Nicotiana tabacum|C3H|C3H family protein	171871	0.000360272	51.9231	40.817	52	27
TRINITY_DN523946_c22_g1_i1	TCP	2291	gnl|BL_ORD_ID|270237Sopen12g015990.1 Solanum pennellii|TCP|TCP family protein	270237	2.00356e-150	54.3424	490.345	806	438
TRINITY_DN523486_c94_g11_i1	FAR1	209	gnl|BL_ORD_ID|199065LOC_Os04g22990.1 Oryza sativa subsp. japonica|FAR1|FAR1 family protein	199065	4.38267e-20	72.0588	87.4261	68	49
TRINITY_DN505779_c11_g2_i3	NAC	351	gnl|BL_ORD_ID|296846TRIUR3_11787-P1 Triticum urartu|NAC|NAC family protein	296846	1.50775e-17	87.234	80.8777	47	41
TRINITY_DN447189_c2_g1_i1	NAC	201	gnl|BL_ORD_ID|213127CCG028923.1 Populus euphratica|NAC|NAC family protein	213127	0.0294644	54.386	34.6538	57	31
TRINITY_DN475716_c7_g1_i3	M-type_MADS	343	gnl|BL_ORD_ID|11872Araha.16643s0001.1.p Arabidopsis halleri|M-type_MADS|M-type_MADS family protein	11872	0.0208836	64.1026	36.1946	39	25
TRINITY_DN464704_c19_g5_i1	NAC	211	gnl|BL_ORD_ID|296846TRIUR3_11787-P1 Triticum urartu|NAC|NAC family protein	296846	1.9379e-22	97.6744	92.4337	43	42
TRINITY_DN428261_c0_g3_i2	NAC	222	gnl|BL_ORD_ID|296846TRIUR3_11787-P1 Triticum urartu|NAC|NAC family protein	296846	3.54871e-20	91.3043	86.2705	46	42
TRINITY_DN472942_c7_g1_i1	bHLH	232	gnl|BL_ORD_ID|297244TRIUR3_29035-P1 Triticum urartu|bHLH|bHLH family protein	297244	5.48712e-19	73.0769	83.1889	78	57
TRINITY_DN517165_c131_g3_i2	bHLH	205	gnl|BL_ORD_ID|296394TRIUR3_31817-P1 Triticum urartu|bHLH|bHLH family protein	296394	2.36628e-21	91.6667	88.1965	48	44
TRINITY_DN320196_c0_g1_i1	NAC	204	gnl|BL_ORD_ID|128048Itr_sc004419.1_g00003.1 Ipomoea trifida|NAC|NAC family protein	128048	1.20685e-08	62.5	54.299	64	40
TRINITY_DN514848_c58_g8_i2	NAC	220	gnl|BL_ORD_ID|296846TRIUR3_11787-P1 Triticum urartu|NAC|NAC family protein	296846	1.68204e-27	85.7143	106.301	63	54
TRINITY_DN505411_c210_g28_i2	B3	2027	gnl|BL_ORD_ID|242048Phvul.006G100700.1 Phaseolus vulgaris|B3|B3 family protein	242048	1.42581e-06	44.3396	53.5286	106	47
TRINITY_DN406731_c2_g3_i1	bHLH	222	gnl|BL_ORD_ID|296394TRIUR3_31817-P1 Triticum urartu|bHLH|bHLH family protein	296394	3.51835e-15	94.2857	71.633	35	33
TRINITY_DN485230_c12_g2_i1	C3H	209	gnl|BL_ORD_ID|171871XP_016440619.1 Nicotiana tabacum|C3H|C3H family protein	171871	1.3084e-09	65.3061	56.6102	49	32
TRINITY_DN523402_c11_g7_i1	M-type_MADS	315	gnl|BL_ORD_ID|198356LOC_Os11g12360.1 Oryza sativa subsp. japonica|M-type_MADS|M-type_MADS family protein	198356	1.3653e-06	46.729	49.2914	107	50
TRINITY_DN494233_c22_g3_i1	ERF	555	gnl|BL_ORD_ID|20250EMT26591 Aegilops tauschii|ERF|ERF family protein	20250	2.04545e-41	90.7895	142.895	76	69
TRINITY_DN352735_c0_g1_i1	M-type_MADS	267	gnl|BL_ORD_ID|198356LOC_Os11g12360.1 Oryza sativa subsp. japonica|M-type_MADS|M-type_MADS family protein	198356	3.67257e-14	66.1538	71.2478	65	43
TRINITY_DN473628_c4_g8_i1	M-type_MADS	273	gnl|BL_ORD_ID|198356LOC_Os11g12360.1 Oryza sativa subsp. japonica|M-type_MADS|M-type_MADS family protein	198356	9.90502e-15	61.9048	73.1738	84	52
TRINITY_DN523759_c16_g2_i2	TCP	2180	gnl|BL_ORD_ID|270237Sopen12g015990.1 Solanum pennellii|TCP|TCP family protein	270237	2.14129e-12	46.6667	74.3294	180	84
TRINITY_DN476635_c29_g8_i2	NAC	326	gnl|BL_ORD_ID|296846TRIUR3_11787-P1 Triticum urartu|NAC|NAC family protein	296846	6.30701e-17	81.25	78.9518	48	39
TRINITY_DN294736_c0_g1_i2	CAMTA	249	gnl|BL_ORD_ID|37397XP_013591879.1 Brassica oleracea|CAMTA|CAMTA family protein	37397	0.0304754	50.9434	35.039	53	27
TRINITY_DN381077_c0_g2_i1	B3	284	gnl|BL_ORD_ID|275234SapurV1A.0523s0270.1.p Salix purpurea|B3|B3 family protein	275234	0.00724727	46.5753	35.4242	73	34
TRINITY_DN478955_c38_g4_i2	FAR1	262	gnl|BL_ORD_ID|199065LOC_Os04g22990.1 Oryza sativa subsp. japonica|FAR1|FAR1 family protein	199065	0.00350571	52.1127	38.1206	71	37
TRINITY_DN451020_c1_g4_i3	MYB	396	gnl|BL_ORD_ID|20477EMT24643 Aegilops tauschii|MYB_related|MYB_related family protein	20477	6.72763e-09	51.6484	56.6102	91	47
TRINITY_DN410021_c2_g1_i1	Nin-like	317	gnl|BL_ORD_ID|93013Thhalv10022536m Eutrema salsugineum|Nin-like|Nin-like family protein	93013	0.00890278	53.8462	37.3502	52	28
TRINITY_DN521195_c1_g5_i2	M-type_MADS	536	gnl|BL_ORD_ID|198356LOC_Os11g12360.1 Oryza sativa subsp. japonica|M-type_MADS|M-type_MADS family protein	198356	5.78986e-28	56.3953	115.161	172	97
TRINITY_DN143103_c1_g1_i2	C2H2	260	gnl|BL_ORD_ID|297126TRIUR3_34542-P1 Triticum urartu|C2H2|C2H2 family protein	297126	2.46895e-20	80.2632	87.4261	76	61
TRINITY_DN510476_c4_g1_i2	M-type_MADS	486	gnl|BL_ORD_ID|198356LOC_Os11g12360.1 Oryza sativa subsp. japonica|M-type_MADS|M-type_MADS family protein	198356	2.65944e-07	57.377	52.373	61	35
TRINITY_DN499810_c13_g4_i2	MYB	290	gnl|BL_ORD_ID|20477EMT24643 Aegilops tauschii|MYB_related|MYB_related family protein	20477	2.30209e-11	89.5833	63.1586	48	43
TRINITY_DN523746_c143_g1_i2	FAR1	345	gnl|BL_ORD_ID|199065LOC_Os04g22990.1 Oryza sativa subsp. japonica|FAR1|FAR1 family protein	199065	5.1119e-13	50.4587	68.9366	109	55
TRINITY_DN404460_c3_g1_i2	bHLH	240	gnl|BL_ORD_ID|296394TRIUR3_31817-P1 Triticum urartu|bHLH|bHLH family protein	296394	1.78443e-21	93.75	88.9669	48	45
TRINITY_DN518881_c41_g3_i2	ZF-HD	896	gnl|BL_ORD_ID|269698Sopen05g016700.1 Solanum pennellii|ZF-HD|ZF-HD family protein	269698	4.49419e-45	53.1034	169.474	290	154
TRINITY_DN455320_c4_g1_i5	Trihelix	223	gnl|BL_ORD_ID|297027TRIUR3_33328-P1 Triticum urartu|Trihelix|Trihelix family protein	297027	3.40029e-28	88.4058	110.538	69	61
TRINITY_DN477185_c12_g4_i1	ZF-HD	286	gnl|BL_ORD_ID|269698Sopen05g016700.1 Solanum pennellii|ZF-HD|ZF-HD family protein	269698	1.72456e-11	58.3333	63.5438	84	49
TRINITY_DN472015_c2_g4_i2	NAC	287	gnl|BL_ORD_ID|128048Itr_sc004419.1_g00003.1 Ipomoea trifida|NAC|NAC family protein	128048	6.15975e-08	57.3333	53.1434	75	43
TRINITY_DN523746_c143_g5_i7	FAR1	1104	gnl|BL_ORD_ID|199065LOC_Os04g22990.1 Oryza sativa subsp. japonica|FAR1|FAR1 family protein	199065	1.2512e-63	65.0407	226.098	246	160
TRINITY_DN462895_c9_g6_i1	NF-YB	394	gnl|BL_ORD_ID|296864TRIUR3_11916-P1 Triticum urartu|NF-YB|NF-YB family protein	296864	4.88e-14	91.1765	70.0922	34	31
TRINITY_DN487501_c5_g1_i1	NAC	238	gnl|BL_ORD_ID|296846TRIUR3_11787-P1 Triticum urartu|NAC|NAC family protein	296846	4.57435e-29	87.5	110.923	64	56
TRINITY_DN456578_c20_g1_i1	NF-YB	278	gnl|BL_ORD_ID|296864TRIUR3_11916-P1 Triticum urartu|NF-YB|NF-YB family protein	296864	9.39848e-09	75	54.299	36	27
TRINITY_DN403425_c1_g1_i1	LBD	216	gnl|BL_ORD_ID|212177CCG002690.1 Populus euphratica|LBD|LBD family protein	212177	0.0347774	51.0638	34.6538	47	24
TRINITY_DN462895_c9_g6_i7	NF-YB	253	gnl|BL_ORD_ID|296864TRIUR3_11916-P1 Triticum urartu|NF-YB|NF-YB family protein	296864	1.01927e-16	91.1765	75.8702	34	31
TRINITY_DN519628_c11_g5_i1	M-type_MADS	328	gnl|BL_ORD_ID|198356LOC_Os11g12360.1 Oryza sativa subsp. japonica|M-type_MADS|M-type_MADS family protein	198356	2.3275e-13	62.7119	69.707	59	37
TRINITY_DN523746_c143_g4_i4	FAR1	1037	gnl|BL_ORD_ID|199065LOC_Os04g22990.1 Oryza sativa subsp. japonica|FAR1|FAR1 family protein	199065	1.19121e-05	49.505	50.447	101	50
TRINITY_DN517454_c33_g6_i1	WRKY	330	gnl|BL_ORD_ID|297335TRIUR3_28409-P1 Triticum urartu|WRKY|WRKY family protein	297335	0.000324321	56.6038	41.5874	53	30
TRINITY_DN463225_c6_g1_i1	ARF	255	gnl|BL_ORD_ID|95574462918339 Eragrostis tef|ARF|ARF family protein	95574	0.0290207	56.4103	35.039	39	22
TRINITY_DN333536_c0_g2_i1	Trihelix	237	gnl|BL_ORD_ID|297027TRIUR3_33328-P1 Triticum urartu|Trihelix|Trihelix family protein	297027	4.77426e-12	82.6087	64.3142	46	38
TRINITY_DN468421_c14_g2_i1	B3	320	gnl|BL_ORD_ID|124947MLOC_64376.11 Hordeum vulgare|B3|B3 family protein	124947	7.80904e-06	46.5909	45.4394	88	41
TRINITY_DN489990_c22_g8_i2	FAR1	345	gnl|BL_ORD_ID|199065LOC_Os04g22990.1 Oryza sativa subsp. japonica|FAR1|FAR1 family protein	199065	1.71331e-17	62.2449	82.0333	98	61
TRINITY_DN195482_c1_g1_i1	bHLH	232	gnl|BL_ORD_ID|296394TRIUR3_31817-P1 Triticum urartu|bHLH|bHLH family protein	296394	4.02536e-22	91.6667	90.5077	48	44
TRINITY_DN517165_c132_g2_i4	FAR1	288	gnl|BL_ORD_ID|199065LOC_Os04g22990.1 Oryza sativa subsp. japonica|FAR1|FAR1 family protein	199065	0.000232985	50	41.9726	86	43
TRINITY_DN518881_c41_g3_i1	NAC	332	gnl|BL_ORD_ID|128048Itr_sc004419.1_g00003.1 Ipomoea trifida|NAC|NAC family protein	128048	1.50197e-19	60.2041	87.8113	98	59
TRINITY_DN523946_c21_g2_i3	TCP	512	gnl|BL_ORD_ID|270237Sopen12g015990.1 Solanum pennellii|TCP|TCP family protein	270237	7.33677e-72	77.5148	241.506	169	131
TRINITY_DN281158_c1_g1_i1	GRAS	229	gnl|BL_ORD_ID|94179Thhalv10006868m Eutrema salsugineum|GRAS|GRAS family protein	94179	0.0166039	59.6491	35.8094	57	34
TRINITY_DN358341_c2_g2_i1	bHLH	267	gnl|BL_ORD_ID|296394TRIUR3_31817-P1 Triticum urartu|bHLH|bHLH family protein	296394	1.14774e-16	83.3333	76.2554	48	40
TRINITY_DN523745_c26_g1_i1	C2H2	280	gnl|BL_ORD_ID|297126TRIUR3_34542-P1 Triticum urartu|C2H2|C2H2 family protein	297126	2.12433e-18	86.1538	82.4185	65	56
TRINITY_DN286936_c13_g2_i1	B3	326	gnl|BL_ORD_ID|20166EMT01685 Aegilops tauschii|B3|B3 family protein	20166	3.96692e-14	56.0976	71.633	82	46
TRINITY_DN507473_c34_g29_i1	TCP	371	gnl|BL_ORD_ID|297028TRIUR3_29014-P1 Triticum urartu|TCP|TCP family protein	297028	3.60767e-07	55.7143	50.447	70	39
TRINITY_DN493879_c31_g9_i12	NAC	954	gnl|BL_ORD_ID|296846TRIUR3_11787-P1 Triticum urartu|NAC|NAC family protein	296846	1.425e-28	90.9091	117.857	66	60
TRINITY_DN481968_c45_g2_i3	B3	559	gnl|BL_ORD_ID|124947MLOC_64376.11 Hordeum vulgare|B3|B3 family protein	124947	1.7443e-06	46.3918	49.2914	97	45
TRINITY_DN382674_c4_g1_i4	NAC	330	gnl|BL_ORD_ID|128048Itr_sc004419.1_g00003.1 Ipomoea trifida|NAC|NAC family protein	128048	6.67746e-10	48.7179	59.3066	117	57
TRINITY_DN356538_c9_g1_i1	M-type_MADS	217	gnl|BL_ORD_ID|72452Carubv10017446m Capsella rubella|M-type_MADS|M-type_MADS family protein	72452	0.0287683	54.3478	34.6538	46	25
TRINITY_DN493879_c31_g9_i3	NAC	708	gnl|BL_ORD_ID|296846TRIUR3_11787-P1 Triticum urartu|NAC|NAC family protein	296846	3.25526e-31	92.4242	123.25	66	61
TRINITY_DN224822_c0_g1_i2	bHLH	219	gnl|BL_ORD_ID|20362EMT03170 Aegilops tauschii|bHLH|bHLH family protein	20362	1.63595e-09	77.7778	55.4546	36	28
TRINITY_DN477924_c49_g1_i1	NAC	301	gnl|BL_ORD_ID|128048Itr_sc004419.1_g00003.1 Ipomoea trifida|NAC|NAC family protein	128048	3.82358e-19	62.3656	86.2705	93	58
TRINITY_DN195482_c1_g3_i1	bHLH	239	gnl|BL_ORD_ID|296394TRIUR3_31817-P1 Triticum urartu|bHLH|bHLH family protein	296394	7.84972e-23	93.75	92.8189	48	45
TRINITY_DN425832_c2_g1_i1	bHLH	687	gnl|BL_ORD_ID|296982TRIUR3_16897-P1 Triticum urartu|bHLH|bHLH family protein	296982	6.24664e-37	90.2778	132.88	72	65
TRINITY_DN472015_c2_g4_i4	B3	290	gnl|BL_ORD_ID|270192Sopen00g003940.1 Solanum pennellii|B3|B3 family protein	270192	1.31945e-08	59.4595	55.0694	74	44
TRINITY_DN389965_c0_g1_i2	MYB	277	gnl|BL_ORD_ID|20187EMT20255 Aegilops tauschii|MYB|MYB family protein	20187	1.94971e-19	83.0189	83.5741	53	44
TRINITY_DN519560_c42_g3_i1	NF-YC	212	gnl|BL_ORD_ID|263429Sme2.5_01876.1_g00001.1 Solanum melongena|NF-YC|NF-YC family protein	263429	3.40138e-19	75.3623	84.3445	69	52
TRINITY_DN423024_c2_g1_i1	NAC	214	gnl|BL_ORD_ID|296846TRIUR3_11787-P1 Triticum urartu|NAC|NAC family protein	296846	4.18005e-32	92.4242	119.013	66	61
TRINITY_DN316361_c2_g1_i1	GATA	308	gnl|BL_ORD_ID|295738Tp57577_TGAC_v2_mRNA2411 Trifolium pratense|GATA|GATA family protein	295738	0.0361922	47.1698	35.039	53	25
TRINITY_DN464439_c3_g2_i1	NAC	271	gnl|BL_ORD_ID|296846TRIUR3_11787-P1 Triticum urartu|NAC|NAC family protein	296846	2.0538e-14	77.0833	70.8626	48	37
TRINITY_DN518536_c29_g21_i1	GRAS	218	gnl|BL_ORD_ID|103313Gh_Sca004802G04 Gossypium hirsutum|GRAS|GRAS family protein	103313	0.0205857	60.5263	35.4242	38	23
TRINITY_DN403852_c1_g1_i1	MYB	205	gnl|BL_ORD_ID|20187EMT20255 Aegilops tauschii|MYB|MYB family protein	20187	4.04375e-34	88.0597	123.25	67	59
TRINITY_DN466750_c5_g1_i1	C2H2	273	gnl|BL_ORD_ID|297126TRIUR3_34542-P1 Triticum urartu|C2H2|C2H2 family protein	297126	1.97243e-14	83.7209	70.8626	43	36
TRINITY_DN251721_c2_g1_i1	bHLH	267	gnl|BL_ORD_ID|296394TRIUR3_31817-P1 Triticum urartu|bHLH|bHLH family protein	296394	2.42112e-21	91.6667	88.9669	48	44
TRINITY_DN515317_c36_g10_i2	NAC	626	gnl|BL_ORD_ID|20708EMT33859 Aegilops tauschii|NAC|NAC family protein	20708	4.25955e-07	57.8125	52.373	64	37
TRINITY_DN281285_c1_g1_i1	Trihelix	211	gnl|BL_ORD_ID|297027TRIUR3_33328-P1 Triticum urartu|Trihelix|Trihelix family protein	297027	7.98737e-11	77.4194	60.4622	62	48
TRINITY_DN368980_c1_g1_i4	NAC	250	gnl|BL_ORD_ID|296846TRIUR3_11787-P1 Triticum urartu|NAC|NAC family protein	296846	1.33219e-13	81.8182	68.5514	44	36
TRINITY_DN478955_c37_g3_i1	FAR1	435	gnl|BL_ORD_ID|199065LOC_Os04g22990.1 Oryza sativa subsp. japonica|FAR1|FAR1 family protein	199065	0.000491818	43.9024	41.9726	82	36
TRINITY_DN188869_c1_g2_i2	ZF-HD	252	gnl|BL_ORD_ID|269698Sopen05g016700.1 Solanum pennellii|ZF-HD|ZF-HD family protein	269698	6.72189e-26	83.3333	105.145	66	55
TRINITY_DN423851_c4_g1_i1	NAC	220	gnl|BL_ORD_ID|296846TRIUR3_11787-P1 Triticum urartu|NAC|NAC family protein	296846	5.62605e-20	93.75	85.8853	48	45
TRINITY_DN464711_c27_g6_i1	bHLH	245	gnl|BL_ORD_ID|258656676783878 Sisymbrium irio|bHLH|bHLH family protein	258656	0.0375502	65.3061	34.6538	49	32
TRINITY_DN486801_c5_g1_i3	FAR1	207	gnl|BL_ORD_ID|199065LOC_Os04g22990.1 Oryza sativa subsp. japonica|FAR1|FAR1 family protein	199065	3.98784e-06	57.8125	46.595	64	37
TRINITY_DN413648_c4_g1_i3	FAR1	218	gnl|BL_ORD_ID|199065LOC_Os04g22990.1 Oryza sativa subsp. japonica|FAR1|FAR1 family protein	199065	1.84111e-13	62.3188	68.5514	69	43
TRINITY_DN505411_c210_g14_i1	NAC	366	gnl|BL_ORD_ID|21294EMT28823 Aegilops tauschii|NAC|NAC family protein	21294	0.00133848	60	40.0466	55	33
TRINITY_DN466356_c1_g7_i1	NAC	247	gnl|BL_ORD_ID|296846TRIUR3_11787-P1 Triticum urartu|NAC|NAC family protein	296846	0.00104642	47.6923	39.2762	65	31
TRINITY_DN477537_c0_g1_i1	FAR1	229	gnl|BL_ORD_ID|313367Zosma45g00810.1 Zostera marina|FAR1|FAR1 family protein	313367	0.000322578	52.6316	40.817	38	20
TRINITY_DN368186_c0_g1_i1	ERF	222	gnl|BL_ORD_ID|270781Sopen11g017580.1 Solanum pennellii|ERF|ERF family protein	270781	1.48383e-13	64.3836	68.9366	73	47
TRINITY_DN517165_c131_g23_i4	bHLH	1669	gnl|BL_ORD_ID|296394TRIUR3_31817-P1 Triticum urartu|bHLH|bHLH family protein	296394	5.18342e-20	95.8333	94.7449	48	46
TRINITY_DN477659_c5_g3_i1	NAC	281	gnl|BL_ORD_ID|84783Do022798.1 Dichanthelium oligosanthes|NAC|NAC family protein	84783	0.00107317	64.7059	40.0466	34	22
TRINITY_DN470634_c2_g2_i1	FAR1	208	gnl|BL_ORD_ID|199065LOC_Os04g22990.1 Oryza sativa subsp. japonica|FAR1|FAR1 family protein	199065	4.11953e-10	59.7015	58.5362	67	40
TRINITY_DN517165_c132_g2_i6	FAR1	688	gnl|BL_ORD_ID|199065LOC_Os04g22990.1 Oryza sativa subsp. japonica|FAR1|FAR1 family protein	199065	5.54915e-23	49.4444	102.064	180	89
TRINITY_DN515649_c60_g3_i1	HRT-like	1942	gnl|BL_ORD_ID|20525EMT21368 Aegilops tauschii|HRT-like|HRT-like family protein	20525	2.46247e-05	65.9091	50.8322	44	29
TRINITY_DN520629_c22_g1_i4	NAC	1803	gnl|BL_ORD_ID|84783Do022798.1 Dichanthelium oligosanthes|NAC|NAC family protein	84783	3.03434e-11	45.5516	69.707	281	128
TRINITY_DN435915_c4_g2_i1	NAC	241	gnl|BL_ORD_ID|128048Itr_sc004419.1_g00003.1 Ipomoea trifida|NAC|NAC family protein	128048	8.33207e-07	83.3333	49.2914	36	30
TRINITY_DN523420_c3_g7_i1	M-type_MADS	239	gnl|BL_ORD_ID|198356LOC_Os11g12360.1 Oryza sativa subsp. japonica|M-type_MADS|M-type_MADS family protein	198356	0.00792901	50.8197	36.965	61	31
TRINITY_DN514821_c23_g9_i1	HD-ZIP	238	gnl|BL_ORD_ID|20784EMT29383 Aegilops tauschii|HD-ZIP|HD-ZIP family protein	20784	0.0001663	55	40.817	60	33
TRINITY_DN475609_c4_g2_i1	FAR1	228	gnl|BL_ORD_ID|199065LOC_Os04g22990.1 Oryza sativa subsp. japonica|FAR1|FAR1 family protein	199065	1.21789e-27	77.3333	109.768	75	58
TRINITY_DN505411_c191_g1_i1	MYB	201	gnl|BL_ORD_ID|20187EMT20255 Aegilops tauschii|MYB|MYB family protein	20187	4.5116e-08	55.5556	51.6026	63	35
TRINITY_DN464384_c12_g2_i6	NAC	276	gnl|BL_ORD_ID|296846TRIUR3_11787-P1 Triticum urartu|NAC|NAC family protein	296846	1.3448e-24	92.5926	99.3673	54	50
TRINITY_DN435641_c1_g1_i3	FAR1	262	gnl|BL_ORD_ID|199065LOC_Os04g22990.1 Oryza sativa subsp. japonica|FAR1|FAR1 family protein	199065	2.38508e-19	61.9048	86.2705	84	52
TRINITY_DN492012_c3_g8_i1	RAV	208	gnl|BL_ORD_ID|46716Bv6_128370_kakc.t1 Beta vulgaris|RAV|RAV family protein	46716	0.040009	48.2759	33.8834	58	28
TRINITY_DN485455_c31_g7_i1	FAR1	380	gnl|BL_ORD_ID|199065LOC_Os04g22990.1 Oryza sativa subsp. japonica|FAR1|FAR1 family protein	199065	1.45062e-11	51.2821	65.0846	117	60
TRINITY_DN470241_c9_g8_i1	NAC	321	gnl|BL_ORD_ID|84783Do022798.1 Dichanthelium oligosanthes|NAC|NAC family protein	84783	7.05155e-10	70.4545	59.3066	44	31
TRINITY_DN467593_c63_g1_i4	FAR1	469	gnl|BL_ORD_ID|199065LOC_Os04g22990.1 Oryza sativa subsp. japonica|FAR1|FAR1 family protein	199065	1.3142e-12	61.7647	68.9366	68	42
TRINITY_DN469667_c2_g4_i3	HD-ZIP	209	gnl|BL_ORD_ID|20784EMT29383 Aegilops tauschii|HD-ZIP|HD-ZIP family protein	20784	0.0166929	56.25	35.039	48	27
TRINITY_DN464613_c0_g1_i5	E2F DP	798	gnl|BL_ORD_ID|223767XP_008245529.1 Prunus mume|E2F/DP|E2F/DP family protein	223767	6.11792e-05	62.2642	47.3654	53	33
TRINITY_DN441927_c1_g2_i1	ZF-HD	238	gnl|BL_ORD_ID|269698Sopen05g016700.1 Solanum pennellii|ZF-HD|ZF-HD family protein	269698	5.61358e-05	47.8261	43.5134	69	33
TRINITY_DN457706_c4_g1_i1	NAC	260	gnl|BL_ORD_ID|296846TRIUR3_11787-P1 Triticum urartu|NAC|NAC family protein	296846	1.52718e-14	79.5918	71.2478	49	39
TRINITY_DN475609_c4_g3_i5	FAR1	468	gnl|BL_ORD_ID|199065LOC_Os04g22990.1 Oryza sativa subsp. japonica|FAR1|FAR1 family protein	199065	1.08643e-41	64.7436	154.066	156	101
TRINITY_DN485717_c25_g5_i3	C2H2	287	gnl|BL_ORD_ID|297126TRIUR3_34542-P1 Triticum urartu|C2H2|C2H2 family protein	297126	7.37737e-14	84.6154	69.707	39	33
TRINITY_DN502636_c0_g1_i1	M-type_MADS	626	gnl|BL_ORD_ID|198356LOC_Os11g12360.1 Oryza sativa subsp. japonica|M-type_MADS|M-type_MADS family protein	198356	5.92265e-17	50	71.633	142	71
TRINITY_DN476159_c33_g3_i3	C2H2	640	gnl|BL_ORD_ID|297126TRIUR3_34542-P1 Triticum urartu|C2H2|C2H2 family protein	297126	4.14949e-12	81.25	67.3958	48	39
TRINITY_DN491812_c2_g2_i1	M-type_MADS	222	gnl|BL_ORD_ID|198356LOC_Os11g12360.1 Oryza sativa subsp. japonica|M-type_MADS|M-type_MADS family protein	198356	7.4854e-14	64.7887	69.707	71	46
TRINITY_DN481874_c0_g11_i1	NAC	236	gnl|BL_ORD_ID|128048Itr_sc004419.1_g00003.1 Ipomoea trifida|NAC|NAC family protein	128048	3.72509e-13	64.1975	67.781	81	52
TRINITY_DN418693_c1_g4_i1	B3	260	gnl|BL_ORD_ID|270192Sopen00g003940.1 Solanum pennellii|B3|B3 family protein	270192	0.00164265	60.3448	39.2762	58	35
TRINITY_DN523964_c10_g6_i1	B3	473	gnl|BL_ORD_ID|294461Tp57577_TGAC_v2_mRNA6311 Trifolium pratense|B3|B3 family protein	294461	0.0191465	43.617	35.8094	94	41
TRINITY_DN477537_c0_g5_i3	TCP	324	gnl|BL_ORD_ID|311705GRMZM2G414114_P01 Zea mays|TCP|TCP family protein	311705	0.0246546	52.6316	35.8094	38	20
TRINITY_DN464368_c6_g6_i2	FAR1	248	gnl|BL_ORD_ID|199065LOC_Os04g22990.1 Oryza sativa subsp. japonica|FAR1|FAR1 family protein	199065	8.33839e-14	59.2593	70.0922	81	48
TRINITY_DN472778_c14_g9_i1	NAC	319	gnl|BL_ORD_ID|84783Do022798.1 Dichanthelium oligosanthes|NAC|NAC family protein	84783	4.71174e-08	54.023	53.5286	87	47
TRINITY_DN298518_c0_g5_i1	B3	277	gnl|BL_ORD_ID|20166EMT01685 Aegilops tauschii|B3|B3 family protein	20166	6.01169e-08	53.8462	52.7582	91	49
TRINITY_DN466304_c31_g3_i1	C2H2	390	gnl|BL_ORD_ID|297126TRIUR3_34542-P1 Triticum urartu|C2H2|C2H2 family protein	297126	1.73574e-15	91.6667	75.485	60	55
TRINITY_DN482192_c3_g4_i1	B3	202	gnl|BL_ORD_ID|270192Sopen00g003940.1 Solanum pennellii|B3|B3 family protein	270192	0.000468015	59.7015	40.4318	67	40
TRINITY_DN466511_c7_g10_i1	EIL	286	gnl|BL_ORD_ID|296967TRIUR3_20987-P1 Triticum urartu|EIL|EIL family protein	296967	0.0149301	67.6471	36.1946	34	23
TRINITY_DN523486_c94_g14_i1	FAR1	231	gnl|BL_ORD_ID|199065LOC_Os04g22990.1 Oryza sativa subsp. japonica|FAR1|FAR1 family protein	199065	9.76136e-28	75.6757	110.153	74	56
TRINITY_DN439987_c3_g4_i1	NAC	456	gnl|BL_ORD_ID|128048Itr_sc004419.1_g00003.1 Ipomoea trifida|NAC|NAC family protein	128048	1.67967e-21	58.3333	95.1301	120	70
TRINITY_DN480258_c1_g2_i1	ERF	213	gnl|BL_ORD_ID|4866Achn239411 Actinidia chinensis|ERF|ERF family protein	4866	0.0360697	58.6957	34.6538	46	27
TRINITY_DN517165_c132_g3_i3	MYB	726	gnl|BL_ORD_ID|20187EMT20255 Aegilops tauschii|MYB|MYB family protein	20187	1.15142e-40	81	147.517	100	81
TRINITY_DN481568_c4_g3_i1	MYB	209	gnl|BL_ORD_ID|20187EMT20255 Aegilops tauschii|MYB|MYB family protein	20187	5.69981e-07	72.093	48.521	43	31
TRINITY_DN48184_c7_g1_i1	C2H2	460	gnl|BL_ORD_ID|297126TRIUR3_34542-P1 Triticum urartu|C2H2|C2H2 family protein	297126	0.000292403	70	42.743	40	28
TRINITY_DN384226_c2_g1_i2	bHLH	266	gnl|BL_ORD_ID|296394TRIUR3_31817-P1 Triticum urartu|bHLH|bHLH family protein	296394	1.87194e-21	91.6667	89.3521	48	44
TRINITY_DN412419_c0_g1_i1	bHLH	212	gnl|BL_ORD_ID|296394TRIUR3_31817-P1 Triticum urartu|bHLH|bHLH family protein	296394	9.60169e-19	93.3333	81.2629	45	42
TRINITY_DN464704_c19_g2_i1	NAC	210	gnl|BL_ORD_ID|296846TRIUR3_11787-P1 Triticum urartu|NAC|NAC family protein	296846	9.68425e-27	94.2308	103.99	52	49
TRINITY_DN454181_c6_g1_i1	B3	349	gnl|BL_ORD_ID|20166EMT01685 Aegilops tauschii|B3|B3 family protein	20166	0.00989046	49.4949	37.3502	99	49
TRINITY_DN401921_c0_g2_i12	NAC	353	gnl|BL_ORD_ID|296846TRIUR3_11787-P1 Triticum urartu|NAC|NAC family protein	296846	1.72484e-11	74.5098	63.5438	51	38
TRINITY_DN361850_c2_g1_i1	bHLH	252	gnl|BL_ORD_ID|297244TRIUR3_29035-P1 Triticum urartu|bHLH|bHLH family protein	297244	9.04521e-05	70.2703	42.743	74	52
TRINITY_DN476206_c7_g8_i2	NAC	213	gnl|BL_ORD_ID|128048Itr_sc004419.1_g00003.1 Ipomoea trifida|NAC|NAC family protein	128048	6.64952e-16	70.4918	75.485	61	43
TRINITY_DN489990_c22_g8_i1	FAR1	293	gnl|BL_ORD_ID|199065LOC_Os04g22990.1 Oryza sativa subsp. japonica|FAR1|FAR1 family protein	199065	9.30199e-13	65.4762	67.3958	84	55
TRINITY_DN225784_c1_g2_i2	FAR1	209	gnl|BL_ORD_ID|199065LOC_Os04g22990.1 Oryza sativa subsp. japonica|FAR1|FAR1 family protein	199065	8.73953e-11	63.7681	60.4622	69	44
TRINITY_DN523486_c91_g1_i5	ZF-HD	986	gnl|BL_ORD_ID|269698Sopen05g016700.1 Solanum pennellii|ZF-HD|ZF-HD family protein	269698	8.44717e-42	48.2972	160.999	323	156
TRINITY_DN367403_c1_g1_i3	HD-ZIP	264	gnl|BL_ORD_ID|216651PH01000183G0940 Phyllostachys heterocycla|HD-ZIP|HD-ZIP family protein	216651	0.00563457	46.0526	37.3502	76	35
TRINITY_DN488920_c3_g8_i3	M-type_MADS	278	gnl|BL_ORD_ID|198356LOC_Os11g12360.1 Oryza sativa subsp. japonica|M-type_MADS|M-type_MADS family protein	198356	2.93203e-13	58.4615	68.9366	65	38
TRINITY_DN464384_c12_g10_i1	NAC	203	gnl|BL_ORD_ID|296846TRIUR3_11787-P1 Triticum urartu|NAC|NAC family protein	296846	2.47988e-21	83.6364	89.3521	55	46
TRINITY_DN441927_c1_g1_i1	B3	270	gnl|BL_ORD_ID|269643Sopen03g007470.1 Solanum pennellii|B3|B3 family protein	269643	7.16544e-05	46.2963	43.5134	54	25
TRINITY_DN477924_c49_g8_i1	B3	296	gnl|BL_ORD_ID|269643Sopen03g007470.1 Solanum pennellii|B3|B3 family protein	269643	2.93492e-19	54.0816	85.8853	98	53
TRINITY_DN315989_c0_g1_i2	bHLH	230	gnl|BL_ORD_ID|216696PH01000069G1480 Phyllostachys heterocycla|bHLH|bHLH family protein	216696	1.6338e-05	53.75	42.3578	80	43
TRINITY_DN382674_c4_g2_i2	ZF-HD	249	gnl|BL_ORD_ID|269698Sopen05g016700.1 Solanum pennellii|ZF-HD|ZF-HD family protein	269698	8.3647e-07	71.1538	49.2914	52	37
TRINITY_DN481419_c7_g3_i4	MYB	227	gnl|BL_ORD_ID|86421EcC047949.20 Eucalyptus camaldulensis|MYB|MYB family protein	86421	0.0254023	48.6486	34.6538	74	36
TRINITY_DN496488_c13_g1_i5	bHLH	319	gnl|BL_ORD_ID|79247orange1.1g019617m Citrus sinensis|bHLH|bHLH family protein	79247	0.0108524	51.0204	36.5798	49	25
TRINITY_DN315986_c1_g1_i1	NAC	202	gnl|BL_ORD_ID|84783Do022798.1 Dichanthelium oligosanthes|NAC|NAC family protein	84783	5.35107e-05	54.6875	43.1282	64	35
TRINITY_DN462895_c9_g4_i1	NF-YB	222	gnl|BL_ORD_ID|296864TRIUR3_11916-P1 Triticum urartu|NF-YB|NF-YB family protein	296864	7.52147e-11	75.6757	59.3066	37	28
TRINITY_DN392368_c0_g1_i1	M-type_MADS	225	gnl|BL_ORD_ID|198356LOC_Os11g12360.1 Oryza sativa subsp. japonica|M-type_MADS|M-type_MADS family protein	198356	2.03524e-31	87.8378	120.553	74	65
TRINITY_DN508838_c31_g1_i2	B3	423	gnl|BL_ORD_ID|20166EMT01685 Aegilops tauschii|B3|B3 family protein	20166	2.7522e-17	51.6129	82.4185	124	64
TRINITY_DN474846_c7_g6_i1	NAC	231	gnl|BL_ORD_ID|20708EMT33859 Aegilops tauschii|NAC|NAC family protein	20708	8.00442e-06	59.6154	45.8246	52	31
TRINITY_DN490403_c11_g2_i1	FAR1	245	gnl|BL_ORD_ID|144070Lsa008424 Lactuca sativa|FAR1|FAR1 family protein	144070	0.0295528	45.7143	35.039	70	32
TRINITY_DN467593_c63_g3_i1	MYB	216	gnl|BL_ORD_ID|20187EMT20255 Aegilops tauschii|MYB|MYB family protein	20187	3.48399e-11	59.1549	60.4622	71	42
TRINITY_DN481421_c1_g6_i3	M-type_MADS	351	gnl|BL_ORD_ID|198356LOC_Os11g12360.1 Oryza sativa subsp. japonica|M-type_MADS|M-type_MADS family protein	198356	2.775e-26	71.2766	107.842	94	67
TRINITY_DN477924_c49_g7_i1	NAC	248	gnl|BL_ORD_ID|128048Itr_sc004419.1_g00003.1 Ipomoea trifida|NAC|NAC family protein	128048	1.31723e-11	60.2564	63.5438	78	47
TRINITY_DN486406_c28_g8_i1	FAR1	307	gnl|BL_ORD_ID|199065LOC_Os04g22990.1 Oryza sativa subsp. japonica|FAR1|FAR1 family protein	199065	9.49042e-08	55.8824	52.7582	68	38
TRINITY_DN499136_c7_g5_i1	NAC	246	gnl|BL_ORD_ID|20708EMT33859 Aegilops tauschii|NAC|NAC family protein	20708	8.23789e-12	58.9744	63.5438	78	46
TRINITY_DN425501_c0_g1_i1	G2-like	225	gnl|BL_ORD_ID|296938TRIUR3_23402-P1 Triticum urartu|G2-like|G2-like family protein	296938	0.00152781	53.9683	38.891	63	34
TRINITY_DN493879_c29_g2_i1	NAC	264	gnl|BL_ORD_ID|296846TRIUR3_11787-P1 Triticum urartu|NAC|NAC family protein	296846	3.15122e-22	95.8333	92.8189	48	46
TRINITY_DN473854_c4_g3_i3	FAR1	336	gnl|BL_ORD_ID|199065LOC_Os04g22990.1 Oryza sativa subsp. japonica|FAR1|FAR1 family protein	199065	4.60737e-12	56.8807	65.855	109	62
TRINITY_DN489673_c11_g7_i1	bHLH	252	gnl|BL_ORD_ID|297244TRIUR3_29035-P1 Triticum urartu|bHLH|bHLH family protein	297244	1.2034e-15	77.4648	73.9442	71	55
TRINITY_DN288124_c0_g1_i1	bZIP	218	gnl|BL_ORD_ID|296500TRIUR3_08598-P1 Triticum urartu|bZIP|bZIP family protein	296500	0.000151903	64.5833	41.9726	48	31
TRINITY_DN468737_c15_g1_i6	NAC	315	gnl|BL_ORD_ID|128048Itr_sc004419.1_g00003.1 Ipomoea trifida|NAC|NAC family protein	128048	0.0166074	60	36.1946	40	24
TRINITY_DN412374_c1_g1_i3	FAR1	252	gnl|BL_ORD_ID|199065LOC_Os04g22990.1 Oryza sativa subsp. japonica|FAR1|FAR1 family protein	199065	1.57039e-07	57.1429	51.6026	63	36
TRINITY_DN519628_c11_g8_i1	M-type_MADS	237	gnl|BL_ORD_ID|198356LOC_Os11g12360.1 Oryza sativa subsp. japonica|M-type_MADS|M-type_MADS family protein	198356	1.42915e-11	71.7391	63.1586	46	33
TRINITY_DN465380_c5_g4_i1	FAR1	207	gnl|BL_ORD_ID|199065LOC_Os04g22990.1 Oryza sativa subsp. japonica|FAR1|FAR1 family protein	199065	9.64388e-12	63.2353	63.5438	68	43
TRINITY_DN411784_c0_g1_i1	B3	201	gnl|BL_ORD_ID|270192Sopen00g003940.1 Solanum pennellii|B3|B3 family protein	270192	0.0019849	53.125	38.5058	64	34
TRINITY_DN286131_c2_g3_i2	bHLH	258	gnl|BL_ORD_ID|296394TRIUR3_31817-P1 Triticum urartu|bHLH|bHLH family protein	296394	8.29971e-15	85.3659	71.2478	41	35
TRINITY_DN467392_c4_g1_i1	MYB	306	gnl|BL_ORD_ID|304308GSVIVT01024357001 Vitis vinifera|MYB|MYB family protein	304308	2.41852e-05	54.023	45.0542	87	47
TRINITY_DN324094_c2_g1_i1	NAC	225	gnl|BL_ORD_ID|128048Itr_sc004419.1_g00003.1 Ipomoea trifida|NAC|NAC family protein	128048	3.3363e-10	61.8421	59.3066	76	47
TRINITY_DN523486_c94_g9_i1	MYB	516	gnl|BL_ORD_ID|20187EMT20255 Aegilops tauschii|MYB|MYB family protein	20187	5.44188e-36	78.3505	132.88	97	76
TRINITY_DN476991_c12_g2_i1	B3	201	gnl|BL_ORD_ID|269643Sopen03g007470.1 Solanum pennellii|B3|B3 family protein	269643	3.02325e-07	50.8475	49.6766	59	30
TRINITY_DN486083_c2_g1_i1	B3	208	gnl|BL_ORD_ID|274858SapurV1A.0185s0330.2.p Salix purpurea|B3|B3 family protein	274858	0.0482178	54.902	33.8834	51	28
TRINITY_DN460695_c16_g5_i1	NAC	241	gnl|BL_ORD_ID|128048Itr_sc004419.1_g00003.1 Ipomoea trifida|NAC|NAC family protein	128048	2.56291e-06	80	47.7506	35	28
TRINITY_DN488918_c6_g4_i1	C2H2	336	gnl|BL_ORD_ID|297126TRIUR3_34542-P1 Triticum urartu|C2H2|C2H2 family protein	297126	4.15627e-17	80.8219	79.337	73	59
TRINITY_DN480541_c8_g1_i1	GRAS	255	gnl|BL_ORD_ID|296836TRIUR3_07891-P1 Triticum urartu|GRAS|GRAS family protein	296836	4.24634e-29	87.6543	110.923	81	71
TRINITY_DN512167_c31_g1_i1	M-type_MADS	1306	gnl|BL_ORD_ID|198356LOC_Os11g12360.1 Oryza sativa subsp. japonica|M-type_MADS|M-type_MADS family protein	198356	1.56238e-37	53.0172	150.984	232	123
TRINITY_DN481456_c60_g1_i1	C2H2	471	gnl|BL_ORD_ID|21127EMT02428 Aegilops tauschii|C2H2|C2H2 family protein	21127	1.88074e-14	94.4444	70.8626	36	34
TRINITY_DN369702_c0_g1_i1	C2H2	212	gnl|BL_ORD_ID|284511Traes_5BL_C3F3A871A.1 Triticum aestivum|C2H2|C2H2 family protein	284511	0.0255577	44.2623	35.039	61	27
TRINITY_DN485717_c25_g5_i6	C2H2	260	gnl|BL_ORD_ID|297126TRIUR3_34542-P1 Triticum urartu|C2H2|C2H2 family protein	297126	7.35954e-14	84.6154	69.3218	39	33
TRINITY_DN456578_c20_g4_i1	NF-YB	251	gnl|BL_ORD_ID|296864TRIUR3_11916-P1 Triticum urartu|NF-YB|NF-YB family protein	296864	4.28795e-10	75	57.7658	36	27
TRINITY_DN515317_c37_g3_i2	NAC	331	gnl|BL_ORD_ID|20708EMT33859 Aegilops tauschii|NAC|NAC family protein	20708	6.55455e-08	57.8947	53.1434	57	33
TRINITY_DN487770_c2_g4_i1	NAC	283	gnl|BL_ORD_ID|296846TRIUR3_11787-P1 Triticum urartu|NAC|NAC family protein	296846	2.39747e-10	66.6667	59.6918	51	34
TRINITY_DN464384_c12_g2_i5	NAC	227	gnl|BL_ORD_ID|296846TRIUR3_11787-P1 Triticum urartu|NAC|NAC family protein	296846	9.61827e-13	91.4286	65.4698	35	32
TRINITY_DN476544_c13_g4_i1	FAR1	215	gnl|BL_ORD_ID|199065LOC_Os04g22990.1 Oryza sativa subsp. japonica|FAR1|FAR1 family protein	199065	2.6441e-18	74.6479	82.4185	71	53
TRINITY_DN505779_c8_g1_i1	NAC	245	gnl|BL_ORD_ID|296846TRIUR3_11787-P1 Triticum urartu|NAC|NAC family protein	296846	7.22096e-22	88.2353	91.2781	51	45
TRINITY_DN522025_c42_g2_i1	AP2	1337	gnl|BL_ORD_ID|209331PDK_30s782571g001 Phoenix dactylifera|AP2|AP2 family protein	209331	0.00409464	45.2991	42.743	117	53
TRINITY_DN246481_c2_g1_i1	FAR1	215	gnl|BL_ORD_ID|199065LOC_Os04g22990.1 Oryza sativa subsp. japonica|FAR1|FAR1 family protein	199065	1.78921e-09	56.7164	56.9954	67	38
TRINITY_DN497643_c6_g1_i1	MYB	309	gnl|BL_ORD_ID|20187EMT20255 Aegilops tauschii|MYB|MYB family protein	20187	1.21573e-09	63.3333	57.3806	60	38
TRINITY_DN463005_c1_g2_i1	NAC	201	gnl|BL_ORD_ID|128048Itr_sc004419.1_g00003.1 Ipomoea trifida|NAC|NAC family protein	128048	2.33453e-06	57.1429	47.3654	70	40
TRINITY_DN480026_c29_g4_i1	ERF	287	gnl|BL_ORD_ID|296375TRIUR3_04273-P1 Triticum urartu|ERF|ERF family protein	296375	2.53689e-08	76.3158	53.5286	38	29
TRINITY_DN412082_c8_g7_i4	TCP	276	gnl|BL_ORD_ID|269425Sopen05g005700.1 Solanum pennellii|TCP|TCP family protein	269425	2.66489e-08	65.3846	53.9138	52	34
TRINITY_DN442622_c0_g1_i2	M-type_MADS	357	gnl|BL_ORD_ID|198356LOC_Os11g12360.1 Oryza sativa subsp. japonica|M-type_MADS|M-type_MADS family protein	198356	6.43379e-08	62.2642	53.5286	53	33
TRINITY_DN518200_c44_g16_i1	bHLH	248	gnl|BL_ORD_ID|296982TRIUR3_16897-P1 Triticum urartu|bHLH|bHLH family protein	296982	3.53323e-06	65.7895	45.0542	38	25
TRINITY_DN502636_c0_g4_i1	M-type_MADS	317	gnl|BL_ORD_ID|198356LOC_Os11g12360.1 Oryza sativa subsp. japonica|M-type_MADS|M-type_MADS family protein	198356	2.69689e-23	61.165	98.5969	103	63
TRINITY_DN498611_c9_g3_i1	NAC	237	gnl|BL_ORD_ID|20708EMT33859 Aegilops tauschii|NAC|NAC family protein	20708	0.0238118	57.5	35.4242	40	23
TRINITY_DN484436_c10_g6_i3	FAR1	216	gnl|BL_ORD_ID|199065LOC_Os04g22990.1 Oryza sativa subsp. japonica|FAR1|FAR1 family protein	199065	1.59924e-08	60.8696	53.9138	46	28
TRINITY_DN286131_c2_g2_i1	NAC	204	gnl|BL_ORD_ID|296846TRIUR3_11787-P1 Triticum urartu|NAC|NAC family protein	296846	8.61926e-12	78.5714	62.7734	42	33
TRINITY_DN336383_c1_g1_i1	NAC	230	gnl|BL_ORD_ID|296846TRIUR3_11787-P1 Triticum urartu|NAC|NAC family protein	296846	1.0155e-21	85.7143	90.8929	56	48
TRINITY_DN286131_c2_g1_i3	bHLH	237	gnl|BL_ORD_ID|296394TRIUR3_31817-P1 Triticum urartu|bHLH|bHLH family protein	296394	3.96356e-13	83.3333	66.2402	42	35
TRINITY_DN479009_c21_g3_i11	HD-ZIP	252	gnl|BL_ORD_ID|216651PH01000183G0940 Phyllostachys heterocycla|HD-ZIP|HD-ZIP family protein	216651	0.000427381	51.5152	40.817	66	34
TRINITY_DN481421_c1_g1_i1	M-type_MADS	219	gnl|BL_ORD_ID|198356LOC_Os11g12360.1 Oryza sativa subsp. japonica|M-type_MADS|M-type_MADS family protein	198356	1.34192e-13	75	68.9366	56	42
TRINITY_DN410376_c0_g2_i3	NAC	338	gnl|BL_ORD_ID|128048Itr_sc004419.1_g00003.1 Ipomoea trifida|NAC|NAC family protein	128048	1.22844e-13	61.3636	70.8626	88	54
TRINITY_DN288124_c0_g1_i2	bZIP	223	gnl|BL_ORD_ID|296500TRIUR3_08598-P1 Triticum urartu|bZIP|bZIP family protein	296500	0.0270016	57.4468	35.039	47	27
TRINITY_DN490110_c13_g6_i1	HD-ZIP	306	gnl|BL_ORD_ID|216651PH01000183G0940 Phyllostachys heterocycla|HD-ZIP|HD-ZIP family protein	216651	0.020861	50	36.1946	52	26
TRINITY_DN475796_c30_g2_i6	MYB	1279	gnl|BL_ORD_ID|20187EMT20255 Aegilops tauschii|MYB|MYB family protein	20187	1.02946e-45	80.1802	166.392	111	89
TRINITY_DN519628_c11_g2_i3	M-type_MADS	612	gnl|BL_ORD_ID|198356LOC_Os11g12360.1 Oryza sativa subsp. japonica|M-type_MADS|M-type_MADS family protein	198356	1.35267e-28	48.6239	117.857	218	106
TRINITY_DN472585_c5_g2_i2	M-type_MADS	280	gnl|BL_ORD_ID|198356LOC_Os11g12360.1 Oryza sativa subsp. japonica|M-type_MADS|M-type_MADS family protein	198356	1.82283e-31	80.2198	121.709	91	73
TRINITY_DN476206_c7_g6_i1	NAC	243	gnl|BL_ORD_ID|128048Itr_sc004419.1_g00003.1 Ipomoea trifida|NAC|NAC family protein	128048	1.54043e-18	65	83.5741	80	52
TRINITY_DN451689_c5_g1_i1	NAC	201	gnl|BL_ORD_ID|128048Itr_sc004419.1_g00003.1 Ipomoea trifida|NAC|NAC family protein	128048	3.74625e-09	59.6774	55.8398	62	37
TRINITY_DN501540_c4_g5_i2	HD-ZIP	246	gnl|BL_ORD_ID|269681Sopen09g021360.1 Solanum pennellii|HD-ZIP|HD-ZIP family protein	269681	4.48575e-31	88.5714	119.783	70	62
TRINITY_DN523745_c23_g1_i2	NAC	207	gnl|BL_ORD_ID|296846TRIUR3_11787-P1 Triticum urartu|NAC|NAC family protein	296846	6.81985e-15	67.7419	71.633	62	42
TRINITY_DN471195_c1_g2_i9	NAC	348	gnl|BL_ORD_ID|296846TRIUR3_11787-P1 Triticum urartu|NAC|NAC family protein	296846	2.32679e-10	74.4186	60.077	43	32
TRINITY_DN409620_c0_g3_i1	FAR1	229	gnl|BL_ORD_ID|82637Dca43462.1 Dianthus caryophyllus|FAR1|FAR1 family protein	82637	7.25528e-14	61.1111	69.707	72	44
TRINITY_DN478853_c3_g1_i1	HSF	295	gnl|BL_ORD_ID|131248WALNUT_00020872-RA Juglans regia|HSF|HSF family protein	131248	0.0306847	57.1429	35.039	56	32
TRINITY_DN314849_c0_g1_i1	bHLH	231	gnl|BL_ORD_ID|296394TRIUR3_31817-P1 Triticum urartu|bHLH|bHLH family protein	296394	2.56487e-17	97.4359	77.7962	39	38
TRINITY_DN489786_c21_g8_i1	NAC	427	gnl|BL_ORD_ID|296846TRIUR3_11787-P1 Triticum urartu|NAC|NAC family protein	296846	1.66483e-10	71.7391	61.2326	46	33
TRINITY_DN522747_c12_g6_i1	HB-PHD	1153	gnl|BL_ORD_ID|20988EMT18532 Aegilops tauschii|HB-PHD|HB-PHD family protein	20988	8.71757e-06	64.1026	50.8322	78	50
TRINITY_DN463225_c6_g1_i3	ARF	275	gnl|BL_ORD_ID|95574462918339 Eragrostis tef|ARF|ARF family protein	95574	0.0428872	56.4103	34.6538	39	22
TRINITY_DN406731_c2_g1_i1	NAC	201	gnl|BL_ORD_ID|296846TRIUR3_11787-P1 Triticum urartu|NAC|NAC family protein	296846	1.38771e-13	74.5098	67.781	51	38
TRINITY_DN428261_c0_g3_i1	NAC	253	gnl|BL_ORD_ID|296846TRIUR3_11787-P1 Triticum urartu|NAC|NAC family protein	296846	2.19615e-30	87.5	114.775	64	56
TRINITY_DN460002_c0_g1_i1	NAC	317	gnl|BL_ORD_ID|296846TRIUR3_11787-P1 Triticum urartu|NAC|NAC family protein	296846	0.00364481	62.8571	38.1206	35	22
TRINITY_DN523486_c94_g16_i1	FAR1	915	gnl|BL_ORD_ID|199065LOC_Os04g22990.1 Oryza sativa subsp. japonica|FAR1|FAR1 family protein	199065	2.80089e-51	64.7577	187.578	227	147
TRINITY_DN491100_c8_g4_i1	FAR1	205	gnl|BL_ORD_ID|199065LOC_Os04g22990.1 Oryza sativa subsp. japonica|FAR1|FAR1 family protein	199065	2.55284e-18	73.5294	82.4185	68	50
TRINITY_DN504308_c20_g2_i1	B3	317	gnl|BL_ORD_ID|20566EMT28125 Aegilops tauschii|B3|B3 family protein	20566	5.10722e-23	84.6154	95.9005	65	55
TRINITY_DN515317_c36_g10_i3	NAC	425	gnl|BL_ORD_ID|20708EMT33859 Aegilops tauschii|NAC|NAC family protein	20708	3.72421e-10	60.9375	60.4622	64	39
TRINITY_DN467593_c63_g13_i1	FAR1	238	gnl|BL_ORD_ID|199065LOC_Os04g22990.1 Oryza sativa subsp. japonica|FAR1|FAR1 family protein	199065	0.0296024	50	35.039	80	40
TRINITY_DN423522_c0_g1_i1	NAC	210	gnl|BL_ORD_ID|296846TRIUR3_11787-P1 Triticum urartu|NAC|NAC family protein	296846	3.06744e-23	91.8367	94.7449	49	45
TRINITY_DN515317_c36_g10_i6	NAC	264	gnl|BL_ORD_ID|20708EMT33859 Aegilops tauschii|NAC|NAC family protein	20708	3.98327e-09	59.6774	56.225	62	37
TRINITY_DN462634_c11_g2_i3	G2-like	290	gnl|BL_ORD_ID|296938TRIUR3_23402-P1 Triticum urartu|G2-like|G2-like family protein	296938	0.0085654	56.5217	36.965	46	26
TRINITY_DN522695_c5_g1_i1	ZF-HD	259	gnl|BL_ORD_ID|269698Sopen05g016700.1 Solanum pennellii|ZF-HD|ZF-HD family protein	269698	3.29921e-25	73.8095	103.219	84	62
TRINITY_DN476635_c26_g2_i1	bHLH	208	gnl|BL_ORD_ID|296394TRIUR3_31817-P1 Triticum urartu|bHLH|bHLH family protein	296394	2.07357e-17	87.5	77.411	48	42
TRINITY_DN455652_c27_g7_i1	B3	363	gnl|BL_ORD_ID|20166EMT01685 Aegilops tauschii|B3|B3 family protein	20166	0.0430985	50.9804	32.7278	51	26
TRINITY_DN496937_c15_g27_i1	B3	332	gnl|BL_ORD_ID|74989PK04891.1 Cannabis sativa|B3|B3 family protein	74989	0.00254865	46.5909	38.891	88	41
TRINITY_DN523237_c18_g3_i1	HD-ZIP	1019	gnl|BL_ORD_ID|269681Sopen09g021360.1 Solanum pennellii|HD-ZIP|HD-ZIP family protein	269681	1.19459e-28	47.6015	122.094	271	129
TRINITY_DN491812_c2_g1_i1	M-type_MADS	278	gnl|BL_ORD_ID|198356LOC_Os11g12360.1 Oryza sativa subsp. japonica|M-type_MADS|M-type_MADS family protein	198356	6.28517e-05	54.6875	43.8986	64	35
TRINITY_DN288991_c1_g1_i1	FAR1	284	gnl|BL_ORD_ID|199065LOC_Os04g22990.1 Oryza sativa subsp. japonica|FAR1|FAR1 family protein	199065	1.05613e-06	48.913	49.2914	92	45
TRINITY_DN492736_c3_g1_i8	HD-ZIP	307	gnl|BL_ORD_ID|216651PH01000183G0940 Phyllostachys heterocycla|HD-ZIP|HD-ZIP family protein	216651	0.00227084	44.4444	38.891	81	36
TRINITY_DN154172_c0_g1_i1	GRAS	284	gnl|BL_ORD_ID|297067TRIUR3_03541-P1 Triticum urartu|GRAS|GRAS family protein	297067	1.29188e-06	64.9123	48.521	57	37
TRINITY_DN519628_c11_g2_i4	M-type_MADS	511	gnl|BL_ORD_ID|198356LOC_Os11g12360.1 Oryza sativa subsp. japonica|M-type_MADS|M-type_MADS family protein	198356	6.9815e-15	46.4481	76.2554	183	85
TRINITY_DN476206_c7_g7_i1	NAC	208	gnl|BL_ORD_ID|128048Itr_sc004419.1_g00003.1 Ipomoea trifida|NAC|NAC family protein	128048	1.19945e-12	62.5	65.855	64	40
TRINITY_DN517165_c130_g4_i1	NAC	364	gnl|BL_ORD_ID|296846TRIUR3_11787-P1 Triticum urartu|NAC|NAC family protein	296846	2.0803e-06	60.7843	48.521	51	31
TRINITY_DN462279_c5_g8_i2	NAC	321	gnl|BL_ORD_ID|128048Itr_sc004419.1_g00003.1 Ipomoea trifida|NAC|NAC family protein	128048	6.35832e-07	58.1081	50.447	74	43
TRINITY_DN467593_c57_g1_i4	FAR1	344	gnl|BL_ORD_ID|199065LOC_Os04g22990.1 Oryza sativa subsp. japonica|FAR1|FAR1 family protein	199065	0.0125958	55	36.965	40	22
TRINITY_DN117348_c0_g2_i1	ERF	257	gnl|BL_ORD_ID|270781Sopen11g017580.1 Solanum pennellii|ERF|ERF family protein	270781	0.000304495	50	41.5874	70	35
TRINITY_DN279840_c0_g1_i1	FAR1	205	gnl|BL_ORD_ID|199065LOC_Os04g22990.1 Oryza sativa subsp. japonica|FAR1|FAR1 family protein	199065	7.63346e-25	76.4706	101.293	68	52
TRINITY_DN437054_c0_g1_i1	MYB	209	gnl|BL_ORD_ID|20187EMT20255 Aegilops tauschii|MYB|MYB family protein	20187	4.63596e-10	78.9474	57.3806	38	30
TRINITY_DN523746_c143_g1_i1	FAR1	261	gnl|BL_ORD_ID|199065LOC_Os04g22990.1 Oryza sativa subsp. japonica|FAR1|FAR1 family protein	199065	1.24595e-09	52.381	57.7658	84	44
TRINITY_DN523887_c4_g2_i1	bHLH	2625	gnl|BL_ORD_ID|21410EMT03129 Aegilops tauschii|bHLH|bHLH family protein	21410	3.10397e-31	50.5263	135.961	285	144
TRINITY_DN469224_c4_g1_i1	B3	268	gnl|BL_ORD_ID|269643Sopen03g007470.1 Solanum pennellii|B3|B3 family protein	269643	2.21671e-05	46.2963	45.0542	54	25
TRINITY_DN517165_c131_g23_i2	C2H2	1196	gnl|BL_ORD_ID|297126TRIUR3_34542-P1 Triticum urartu|C2H2|C2H2 family protein	297126	6.68011e-07	65.5914	54.299	93	61
TRINITY_DN479840_c3_g1_i2	bHLH	229	gnl|BL_ORD_ID|127482Itr_sc000185.1_g00001.1 Ipomoea trifida|bHLH|bHLH family protein	127482	0.0111485	59.4595	36.1946	37	22
TRINITY_DN464711_c26_g2_i1	FAR1	234	gnl|BL_ORD_ID|199065LOC_Os04g22990.1 Oryza sativa subsp. japonica|FAR1|FAR1 family protein	199065	0.00886481	68.5714	36.5798	35	24
TRINITY_DN360535_c0_g1_i1	NAC	202	gnl|BL_ORD_ID|296846TRIUR3_11787-P1 Triticum urartu|NAC|NAC family protein	296846	5.7406e-16	64.7887	74.3294	71	46
TRINITY_DN334042_c0_g1_i1	GRAS	224	gnl|BL_ORD_ID|296836TRIUR3_07891-P1 Triticum urartu|GRAS|GRAS family protein	296836	8.12816e-18	90	79.7221	40	36
TRINITY_DN393770_c0_g1_i1	ZF-HD	214	gnl|BL_ORD_ID|269698Sopen05g016700.1 Solanum pennellii|ZF-HD|ZF-HD family protein	269698	8.87296e-06	55.3571	45.8246	56	31
TRINITY_DN490126_c13_g4_i1	B3	240	gnl|BL_ORD_ID|270192Sopen00g003940.1 Solanum pennellii|B3|B3 family protein	270192	3.45271e-07	56.1644	50.0618	73	41
TRINITY_DN488920_c2_g1_i1	M-type_MADS	396	gnl|BL_ORD_ID|198356LOC_Os11g12360.1 Oryza sativa subsp. japonica|M-type_MADS|M-type_MADS family protein	198356	6.20948e-25	63.0631	104.375	111	70
TRINITY_DN519628_c11_g2_i7	M-type_MADS	317	gnl|BL_ORD_ID|198356LOC_Os11g12360.1 Oryza sativa subsp. japonica|M-type_MADS|M-type_MADS family protein	198356	1.28307e-19	66.6667	77.411	69	46
TRINITY_DN481874_c0_g10_i4	NAC	294	gnl|BL_ORD_ID|128048Itr_sc004419.1_g00003.1 Ipomoea trifida|NAC|NAC family protein	128048	1.04824e-11	62.963	64.3142	81	51
TRINITY_DN489113_c10_g1_i2	NAC	296	gnl|BL_ORD_ID|128048Itr_sc004419.1_g00003.1 Ipomoea trifida|NAC|NAC family protein	128048	0.00144627	55.3571	39.6614	56	31
TRINITY_DN479844_c14_g1_i1	NAC	244	gnl|BL_ORD_ID|20708EMT33859 Aegilops tauschii|NAC|NAC family protein	20708	4.85293e-07	58.1818	49.6766	55	32
TRINITY_DN523272_c2_g2_i2	GATA	2606	gnl|BL_ORD_ID|20890EMT30068 Aegilops tauschii|GATA|GATA family protein	20890	0.000770968	51.8519	46.2098	81	42
TRINITY_DN458424_c4_g1_i2	NAC	264	gnl|BL_ORD_ID|296846TRIUR3_11787-P1 Triticum urartu|NAC|NAC family protein	296846	3.63132e-12	78.5714	64.3142	42	33
TRINITY_DN514848_c51_g1_i3	NAC	279	gnl|BL_ORD_ID|296846TRIUR3_11787-P1 Triticum urartu|NAC|NAC family protein	296846	1.31312e-10	83.3333	60.077	36	30
TRINITY_DN482023_c7_g4_i1	bHLH	239	gnl|BL_ORD_ID|296394TRIUR3_31817-P1 Triticum urartu|bHLH|bHLH family protein	296394	2.46214e-11	83.3333	61.2326	36	30
TRINITY_DN487421_c10_g2_i2	FAR1	225	gnl|BL_ORD_ID|199065LOC_Os04g22990.1 Oryza sativa subsp. japonica|FAR1|FAR1 family protein	199065	6.07537e-12	59.4203	64.3142	69	41
TRINITY_DN451125_c7_g2_i2	NAC	224	gnl|BL_ORD_ID|128048Itr_sc004419.1_g00003.1 Ipomoea trifida|NAC|NAC family protein	128048	4.70495e-08	60.8108	52.7582	74	45
TRINITY_DN401171_c0_g1_i1	NAC	222	gnl|BL_ORD_ID|296846TRIUR3_11787-P1 Triticum urartu|NAC|NAC family protein	296846	8.12367e-32	94.8276	118.242	58	55
TRINITY_DN520454_c26_g10_i7	B3	271	gnl|BL_ORD_ID|305015Zjn_sc00019.1.g02220.1.sm.mkhc Zoysia japonica|B3|B3 family protein	305015	0.00208141	51.8519	38.891	54	28
TRINITY_DN460630_c9_g1_i2	TCP	294	gnl|BL_ORD_ID|270237Sopen12g015990.1 Solanum pennellii|TCP|TCP family protein	270237	8.39738e-25	65.625	102.449	96	63
TRINITY_DN480694_c24_g2_i2	C2H2	207	gnl|BL_ORD_ID|297126TRIUR3_34542-P1 Triticum urartu|C2H2|C2H2 family protein	297126	1.8379e-15	93.4426	73.1738	61	57
TRINITY_DN414791_c0_g1_i3	NAC	283	gnl|BL_ORD_ID|128048Itr_sc004419.1_g00003.1 Ipomoea trifida|NAC|NAC family protein	128048	1.30696e-13	65.3846	70.0922	78	51
TRINITY_DN315323_c0_g1_i1	FAR1	205	gnl|BL_ORD_ID|199065LOC_Os04g22990.1 Oryza sativa subsp. japonica|FAR1|FAR1 family protein	199065	6.53769e-07	53.7313	48.9062	67	36
TRINITY_DN404495_c0_g3_i1	C2H2	306	gnl|BL_ORD_ID|21127EMT02428 Aegilops tauschii|C2H2|C2H2 family protein	21127	2.58982e-10	85.2941	57.3806	34	29
TRINITY_DN464221_c6_g8_i1	ERF	206	gnl|BL_ORD_ID|41088XP_009146782.1 Brassica rapa|ERF|ERF family protein	41088	0.0264747	55.102	34.6538	49	27
TRINITY_DN519560_c42_g2_i1	TCP	1562	gnl|BL_ORD_ID|270237Sopen12g015990.1 Solanum pennellii|TCP|TCP family protein	270237	1.65286e-174	73.7271	548.51	491	362
TRINITY_DN392288_c1_g1_i1	NAC	222	gnl|BL_ORD_ID|296846TRIUR3_11787-P1 Triticum urartu|NAC|NAC family protein	296846	1.85887e-11	77.7778	62.003	45	35
TRINITY_DN488590_c1_g9_i1	M-type_MADS	231	gnl|BL_ORD_ID|198356LOC_Os11g12360.1 Oryza sativa subsp. japonica|M-type_MADS|M-type_MADS family protein	198356	0.000346164	52.9412	41.2022	68	36
TRINITY_DN497173_c5_g5_i2	B3	252	gnl|BL_ORD_ID|270192Sopen00g003940.1 Solanum pennellii|B3|B3 family protein	270192	0.000477742	48.75	40.817	80	39
TRINITY_DN464613_c0_g1_i2	E2F DP	755	gnl|BL_ORD_ID|223767XP_008245529.1 Prunus mume|E2F/DP|E2F/DP family protein	223767	5.28335e-05	62.2642	47.3654	53	33
TRINITY_DN414791_c0_g1_i2	NAC	310	gnl|BL_ORD_ID|128048Itr_sc004419.1_g00003.1 Ipomoea trifida|NAC|NAC family protein	128048	1.34861e-15	58.3333	76.2554	108	63
TRINITY_DN480035_c5_g1_i1	NF-YC	244	gnl|BL_ORD_ID|263429Sme2.5_01876.1_g00001.1 Solanum melongena|NF-YC|NF-YC family protein	263429	3.26244e-12	72.2222	64.6994	54	39
TRINITY_DN223813_c0_g1_i1	C2H2	226	gnl|BL_ORD_ID|36461XP_013623881.1 Brassica oleracea|C2H2|C2H2 family protein	36461	0.0040954	61.8182	37.3502	55	34
TRINITY_DN485455_c30_g4_i1	ERF	264	gnl|BL_ORD_ID|66983augustus_masked-scaffold00465-abinit-gene-0.12-mRNA-1 Castanea mollissima|ERF|ERF family protein	66983	0.0225144	63.1579	35.4242	38	24
TRINITY_DN343256_c1_g1_i2	NAC	223	gnl|BL_ORD_ID|306416Zjn_sc00005.1.g03670.1.sm.mkhc Zoysia japonica|NAC|NAC family protein	306416	4.56605e-26	75	102.064	72	54
TRINITY_DN468737_c14_g6_i1	ZF-HD	377	gnl|BL_ORD_ID|269698Sopen05g016700.1 Solanum pennellii|ZF-HD|ZF-HD family protein	269698	0.00230831	50	39.6614	60	30
TRINITY_DN465484_c17_g5_i1	NAC	216	gnl|BL_ORD_ID|128048Itr_sc004419.1_g00003.1 Ipomoea trifida|NAC|NAC family protein	128048	3.06736e-09	60.6557	56.225	61	37
TRINITY_DN470535_c19_g6_i1	FAR1	227	gnl|BL_ORD_ID|199065LOC_Os04g22990.1 Oryza sativa subsp. japonica|FAR1|FAR1 family protein	199065	0.0289872	47.2727	35.039	55	26
TRINITY_DN522619_c27_g4_i1	M-type_MADS	727	gnl|BL_ORD_ID|198356LOC_Os11g12360.1 Oryza sativa subsp. japonica|M-type_MADS|M-type_MADS family protein	198356	9.97424e-07	42.4419	52.373	172	73
TRINITY_DN435004_c0_g1_i1	FAR1	284	gnl|BL_ORD_ID|82637Dca43462.1 Dianthus caryophyllus|FAR1|FAR1 family protein	82637	2.70393e-09	57.5	56.9954	80	46
TRINITY_DN370852_c1_g1_i1	FAR1	202	gnl|BL_ORD_ID|199065LOC_Os04g22990.1 Oryza sativa subsp. japonica|FAR1|FAR1 family protein	199065	2.7262e-25	80.597	102.449	67	54
TRINITY_DN500023_c50_g1_i1	G2-like	201	gnl|BL_ORD_ID|269678Sopen11g010100.1 Solanum pennellii|G2-like|G2-like family protein	269678	3.40738e-07	52.2388	49.6766	67	35
TRINITY_DN500504_c4_g3_i3	NF-YA	349	gnl|BL_ORD_ID|269338Sopen02g006770.1 Solanum pennellii|NF-YA|NF-YA family protein	269338	0.000477902	54.6667	41.5874	75	41
TRINITY_DN465132_c0_g1_i2	NAC	232	gnl|BL_ORD_ID|128048Itr_sc004419.1_g00003.1 Ipomoea trifida|NAC|NAC family protein	128048	4.35495e-10	59.4203	58.9214	69	41
TRINITY_DN478272_c25_g3_i3	FAR1	332	gnl|BL_ORD_ID|199065LOC_Os04g22990.1 Oryza sativa subsp. japonica|FAR1|FAR1 family protein	199065	0.000149898	52.6316	43.1282	76	40
TRINITY_DN430198_c7_g2_i1	FAR1	203	gnl|BL_ORD_ID|199065LOC_Os04g22990.1 Oryza sativa subsp. japonica|FAR1|FAR1 family protein	199065	0.0033073	49.2537	37.7354	67	33
TRINITY_DN482909_c1_g7_i2	HSF	242	gnl|BL_ORD_ID|46484Bv3_065440_fztq.t1 Beta vulgaris|HSF|HSF family protein	46484	0.00548772	50	37.3502	52	26
TRINITY_DN511359_c2_g2_i3	M-type_MADS	476	gnl|BL_ORD_ID|198356LOC_Os11g12360.1 Oryza sativa subsp. japonica|M-type_MADS|M-type_MADS family protein	198356	5.19546e-12	68.3333	67.0106	60	41
TRINITY_DN272481_c0_g1_i1	C2H2	225	gnl|BL_ORD_ID|296602TRIUR3_32111-P1 Triticum urartu|C2H2|C2H2 family protein	296602	3.67118e-20	90	86.2705	40	36
TRINITY_DN460266_c0_g1_i1	NAC	231	gnl|BL_ORD_ID|296846TRIUR3_11787-P1 Triticum urartu|NAC|NAC family protein	296846	4.49218e-05	50.8475	43.5134	59	30
TRINITY_DN496218_c5_g2_i1	NAC	213	gnl|BL_ORD_ID|20708EMT33859 Aegilops tauschii|NAC|NAC family protein	20708	0.00350717	57.7778	37.7354	45	26
TRINITY_DN451125_c7_g3_i1	NAC	236	gnl|BL_ORD_ID|128048Itr_sc004419.1_g00003.1 Ipomoea trifida|NAC|NAC family protein	128048	2.09686e-07	60.2941	50.8322	68	41
TRINITY_DN523518_c43_g7_i1	Trihelix	1018	gnl|BL_ORD_ID|50223XP_004487156.1 Cicer arietinum|Trihelix|Trihelix family protein	50223	2.50434e-11	43.1907	67.781	257	111
TRINITY_DN523979_c13_g1_i8	FAR1	4718	gnl|BL_ORD_ID|20953EMT18279 Aegilops tauschii|FAR1|FAR1 family protein	20953	0	95.3202	734.176	406	387
TRINITY_DN474846_c7_g8_i1	NAC	278	gnl|BL_ORD_ID|20708EMT33859 Aegilops tauschii|NAC|NAC family protein	20708	5.07258e-10	60.3175	58.9214	63	38
TRINITY_DN488920_c3_g14_i1	NAC	217	gnl|BL_ORD_ID|20269EMT14186 Aegilops tauschii|NAC|NAC family protein	20269	1.62232e-11	89.4737	59.6918	38	34
TRINITY_DN470535_c19_g4_i1	FAR1	249	gnl|BL_ORD_ID|199065LOC_Os04g22990.1 Oryza sativa subsp. japonica|FAR1|FAR1 family protein	199065	2.57591e-10	51.3158	59.6918	76	39
TRINITY_DN468788_c5_g5_i1	ZF-HD	230	gnl|BL_ORD_ID|269698Sopen05g016700.1 Solanum pennellii|ZF-HD|ZF-HD family protein	269698	0.0150391	64.9123	36.1946	57	37
TRINITY_DN479981_c11_g7_i6	bHLH	208	gnl|BL_ORD_ID|20362EMT03170 Aegilops tauschii|bHLH|bHLH family protein	20362	3.47199e-10	80	56.9954	35	28
TRINITY_DN489673_c11_g7_i3	bHLH	294	gnl|BL_ORD_ID|297244TRIUR3_29035-P1 Triticum urartu|bHLH|bHLH family protein	297244	5.24833e-16	81.4286	75.485	70	57
TRINITY_DN489661_c3_g1_i1	ERF	210	gnl|BL_ORD_ID|291652XP_010556248.1 Tarenaya hassleriana|ERF|ERF family protein	291652	1.0069e-19	71.4286	86.2705	70	50
TRINITY_DN430616_c0_g3_i1	NAC	267	gnl|BL_ORD_ID|128048Itr_sc004419.1_g00003.1 Ipomoea trifida|NAC|NAC family protein	128048	2.90707e-06	55.4054	47.7506	74	41
TRINITY_DN520959_c15_g10_i1	NF-YA	474	gnl|BL_ORD_ID|269338Sopen02g006770.1 Solanum pennellii|NF-YA|NF-YA family protein	269338	0.00346965	58.6957	40.0466	46	27
TRINITY_DN471092_c19_g7_i1	NAC	277	gnl|BL_ORD_ID|20708EMT33859 Aegilops tauschii|NAC|NAC family protein	20708	3.73268e-05	59.5745	44.2838	47	28
TRINITY_DN173176_c0_g1_i1	NAC	237	gnl|BL_ORD_ID|296846TRIUR3_11787-P1 Triticum urartu|NAC|NAC family protein	296846	5.83321e-14	83.3333	69.3218	42	35
TRINITY_DN519560_c40_g3_i6	TCP	472	gnl|BL_ORD_ID|270237Sopen12g015990.1 Solanum pennellii|TCP|TCP family protein	270237	6.33776e-10	44.2623	60.8474	122	54
TRINITY_DN517165_c131_g9_i4	bHLH	415	gnl|BL_ORD_ID|296394TRIUR3_31817-P1 Triticum urartu|bHLH|bHLH family protein	296394	1.88434e-21	93.75	91.2781	48	45
TRINITY_DN499810_c13_g1_i1	MYB	301	gnl|BL_ORD_ID|20477EMT24643 Aegilops tauschii|MYB_related|MYB_related family protein	20477	1.30272e-10	73.913	61.2326	69	51
TRINITY_DN467593_c63_g6_i1	FAR1	440	gnl|BL_ORD_ID|199065LOC_Os04g22990.1 Oryza sativa subsp. japonica|FAR1|FAR1 family protein	199065	1.67564e-10	59.322	62.3882	59	35
TRINITY_DN477799_c7_g6_i1	TCP	232	gnl|BL_ORD_ID|270237Sopen12g015990.1 Solanum pennellii|TCP|TCP family protein	270237	0.000972731	40.6977	39.6614	86	35
TRINITY_DN445411_c6_g2_i1	G2-like	221	gnl|BL_ORD_ID|296938TRIUR3_23402-P1 Triticum urartu|G2-like|G2-like family protein	296938	0.0328582	60.4651	34.6538	43	26
TRINITY_DN466904_c3_g3_i1	NAC	206	gnl|BL_ORD_ID|296846TRIUR3_11787-P1 Triticum urartu|NAC|NAC family protein	296846	1.26893e-07	65.3061	50.8322	49	32
TRINITY_DN286131_c2_g2_i2	NAC	214	gnl|BL_ORD_ID|296846TRIUR3_11787-P1 Triticum urartu|NAC|NAC family protein	296846	1.94607e-14	76.5957	70.4774	47	36
TRINITY_DN465754_c10_g3_i2	FAR1	234	gnl|BL_ORD_ID|307257XP_015878565.1 Ziziphus jujuba|FAR1|FAR1 family protein	307257	0.0235669	43.2432	35.4242	74	32
TRINITY_DN468108_c1_g4_i1	M-type_MADS	202	gnl|BL_ORD_ID|198356LOC_Os11g12360.1 Oryza sativa subsp. japonica|M-type_MADS|M-type_MADS family protein	198356	1.17531e-14	64.1791	71.633	67	43
TRINITY_DN418693_c1_g5_i4	ZF-HD	285	gnl|BL_ORD_ID|269698Sopen05g016700.1 Solanum pennellii|ZF-HD|ZF-HD family protein	269698	2.49107e-09	58.6667	57.3806	75	44
TRINITY_DN494078_c2_g5_i1	ERF	208	gnl|BL_ORD_ID|270781Sopen11g017580.1 Solanum pennellii|ERF|ERF family protein	270781	4.00631e-08	54.0984	52.7582	61	33
TRINITY_DN415305_c0_g1_i1	HD-ZIP	244	gnl|BL_ORD_ID|269681Sopen09g021360.1 Solanum pennellii|HD-ZIP|HD-ZIP family protein	269681	0.0094163	46.9136	36.5798	81	38
TRINITY_DN485230_c12_g3_i1	B3	221	gnl|BL_ORD_ID|270192Sopen00g003940.1 Solanum pennellii|B3|B3 family protein	270192	0.00202909	44.898	38.5058	49	22
TRINITY_DN405924_c1_g3_i3	Trihelix	298	gnl|BL_ORD_ID|297027TRIUR3_33328-P1 Triticum urartu|Trihelix|Trihelix family protein	297027	1.24614e-23	68.0851	98.5969	94	64
TRINITY_DN487037_c5_g1_i2	NAC	222	gnl|BL_ORD_ID|296846TRIUR3_11787-P1 Triticum urartu|NAC|NAC family protein	296846	9.67657e-10	66.6667	56.9954	57	38
TRINITY_DN523207_c24_g6_i2	Nin-like	881	gnl|BL_ORD_ID|311924GRMZM2G472589_P01 Zea mays|Nin-like|Nin-like family protein	311924	3.49463e-05	52.0548	48.1358	73	38
TRINITY_DN523883_c15_g1_i1	TCP	221	gnl|BL_ORD_ID|270237Sopen12g015990.1 Solanum pennellii|TCP|TCP family protein	270237	1.94824e-24	72.6027	100.523	73	53
TRINITY_DN460007_c1_g11_i1	FAR1	251	gnl|BL_ORD_ID|199065LOC_Os04g22990.1 Oryza sativa subsp. japonica|FAR1|FAR1 family protein	199065	3.2599e-20	69.8795	88.5817	83	58
TRINITY_DN357567_c1_g1_i2	GATA	210	gnl|BL_ORD_ID|296559TRIUR3_22272-P1 Triticum urartu|GATA|GATA family protein	296559	3.96667e-12	66.0714	63.5438	56	37
TRINITY_DN471195_c1_g2_i7	NAC	235	gnl|BL_ORD_ID|296846TRIUR3_11787-P1 Triticum urartu|NAC|NAC family protein	296846	3.26019e-11	80	61.2326	35	28
TRINITY_DN494750_c8_g1_i2	NAC	243	gnl|BL_ORD_ID|296846TRIUR3_11787-P1 Triticum urartu|NAC|NAC family protein	296846	7.68606e-12	61.039	63.1586	77	47
TRINITY_DN490110_c13_g8_i1	HD-ZIP	365	gnl|BL_ORD_ID|216651PH01000183G0940 Phyllostachys heterocycla|HD-ZIP|HD-ZIP family protein	216651	0.0219363	50.7463	36.5798	67	34
TRINITY_DN479036_c3_g5_i1	WRKY	321	gnl|BL_ORD_ID|297335TRIUR3_28409-P1 Triticum urartu|WRKY|WRKY family protein	297335	0.000797795	68.4211	40.0466	38	26
TRINITY_DN523746_c143_g7_i2	MYB	478	gnl|BL_ORD_ID|20187EMT20255 Aegilops tauschii|MYB|MYB family protein	20187	4.96652e-24	67.7083	99.3673	96	65
TRINITY_DN517165_c99_g1_i1	FAR1	313	gnl|BL_ORD_ID|199065LOC_Os04g22990.1 Oryza sativa subsp. japonica|FAR1|FAR1 family protein	199065	0.00148455	48.8372	39.6614	86	42
TRINITY_DN510077_c14_g3_i2	FAR1	402	gnl|BL_ORD_ID|199065LOC_Os04g22990.1 Oryza sativa subsp. japonica|FAR1|FAR1 family protein	199065	1.21655e-06	52.3077	50.0618	65	34
TRINITY_DN473854_c4_g3_i9	FAR1	272	gnl|BL_ORD_ID|199065LOC_Os04g22990.1 Oryza sativa subsp. japonica|FAR1|FAR1 family protein	199065	4.05686e-09	56.6667	56.6102	90	51
TRINITY_DN453988_c5_g3_i1	B3	219	gnl|BL_ORD_ID|20166EMT01685 Aegilops tauschii|B3|B3 family protein	20166	0.0159062	47.3684	25.7942	38	18
TRINITY_DN485717_c22_g1_i1	NAC	206	gnl|BL_ORD_ID|296846TRIUR3_11787-P1 Triticum urartu|NAC|NAC family protein	296846	2.59907e-08	72.2222	52.7582	36	26
TRINITY_DN481421_c1_g6_i1	M-type_MADS	406	gnl|BL_ORD_ID|198356LOC_Os11g12360.1 Oryza sativa subsp. japonica|M-type_MADS|M-type_MADS family protein	198356	3.27007e-46	74.0741	166.007	135	100
TRINITY_DN523486_c92_g6_i2	bHLH	773	gnl|BL_ORD_ID|297244TRIUR3_29035-P1 Triticum urartu|bHLH|bHLH family protein	297244	1.00076e-17	73.913	85.1149	69	51
TRINITY_DN379461_c0_g1_i1	NAC	225	gnl|BL_ORD_ID|296846TRIUR3_11787-P1 Triticum urartu|NAC|NAC family protein	296846	1.21007e-27	83.3333	106.686	66	55
TRINITY_DN464711_c28_g5_i2	bHLH	397	gnl|BL_ORD_ID|258656676783878 Sisymbrium irio|bHLH|bHLH family protein	258656	0.00010528	67.2414	43.5134	58	39
TRINITY_DN373939_c0_g3_i3	NAC	302	gnl|BL_ORD_ID|277362SapurV1A.0561s0300.1.p Salix purpurea|NAC|NAC family protein	277362	0.0206267	46.25	35.8094	80	37
TRINITY_DN481263_c2_g6_i1	NAC	227	gnl|BL_ORD_ID|296846TRIUR3_11787-P1 Triticum urartu|NAC|NAC family protein	296846	6.18152e-20	81.1321	85.8853	53	43
TRINITY_DN452969_c1_g1_i1	B3	212	gnl|BL_ORD_ID|20566EMT28125 Aegilops tauschii|B3|B3 family protein	20566	1.38724e-09	84.6154	56.6102	39	33
TRINITY_DN489437_c15_g2_i2	B3	364	gnl|BL_ORD_ID|20166EMT01685 Aegilops tauschii|B3|B3 family protein	20166	0.00134129	48.9362	40.0466	94	46
TRINITY_DN493310_c5_g3_i1	LBD	324	gnl|BL_ORD_ID|319689Zpz_sc02343.1.g00020.1.am.mk Zoysia pacifica|LBD|LBD family protein	319689	0.000754643	46.7391	40.4318	92	43
TRINITY_DN517362_c27_g9_i1	NAC	268	gnl|BL_ORD_ID|296846TRIUR3_11787-P1 Triticum urartu|NAC|NAC family protein	296846	1.0651e-10	71.7391	60.4622	46	33
TRINITY_DN470535_c19_g3_i1	FAR1	213	gnl|BL_ORD_ID|199065LOC_Os04g22990.1 Oryza sativa subsp. japonica|FAR1|FAR1 family protein	199065	1.21397e-07	50	51.6026	68	34
TRINITY_DN523746_c143_g3_i1	FAR1	579	gnl|BL_ORD_ID|199065LOC_Os04g22990.1 Oryza sativa subsp. japonica|FAR1|FAR1 family protein	199065	3.99348e-69	72.3958	234.572	192	139
TRINITY_DN289248_c2_g1_i1	NAC	207	gnl|BL_ORD_ID|21294EMT28823 Aegilops tauschii|NAC|NAC family protein	21294	0.00244015	54	38.1206	50	27
TRINITY_DN471265_c6_g5_i1	MYB	302	gnl|BL_ORD_ID|20187EMT20255 Aegilops tauschii|MYB|MYB family protein	20187	6.46293e-15	80.4348	72.0182	46	37
TRINITY_DN519628_c8_g1_i1	NAC	256	gnl|BL_ORD_ID|20269EMT14186 Aegilops tauschii|NAC|NAC family protein	20269	3.12962e-07	83.3333	48.521	36	30
TRINITY_DN486962_c3_g1_i1	ERF	227	gnl|BL_ORD_ID|291652XP_010556248.1 Tarenaya hassleriana|ERF|ERF family protein	291652	1.33572e-19	74.2857	86.2705	70	52
TRINITY_DN451125_c7_g6_i2	NAC	285	gnl|BL_ORD_ID|128048Itr_sc004419.1_g00003.1 Ipomoea trifida|NAC|NAC family protein	128048	1.14794e-12	60.4651	67.0106	86	52
TRINITY_DN473032_c10_g6_i1	B3	262	gnl|BL_ORD_ID|270192Sopen00g003940.1 Solanum pennellii|B3|B3 family protein	270192	1.46872e-05	60.3175	45.4394	63	38
TRINITY_DN456372_c0_g2_i1	FAR1	224	gnl|BL_ORD_ID|199065LOC_Os04g22990.1 Oryza sativa subsp. japonica|FAR1|FAR1 family protein	199065	6.33132e-05	49.2063	43.5134	63	31
TRINITY_DN381751_c0_g1_i3	ERF	219	gnl|BL_ORD_ID|270781Sopen11g017580.1 Solanum pennellii|ERF|ERF family protein	270781	3.43164e-08	70.8333	53.1434	48	34
TRINITY_DN444368_c2_g3_i3	NAC	275	gnl|BL_ORD_ID|128048Itr_sc004419.1_g00003.1 Ipomoea trifida|NAC|NAC family protein	128048	6.30257e-15	60.6742	73.559	89	54
TRINITY_DN503383_c11_g1_i1	NAC	303	gnl|BL_ORD_ID|128048Itr_sc004419.1_g00003.1 Ipomoea trifida|NAC|NAC family protein	128048	0.000609479	50.6849	40.817	73	37
TRINITY_DN523759_c16_g5_i3	TCP	452	gnl|BL_ORD_ID|270237Sopen12g015990.1 Solanum pennellii|TCP|TCP family protein	270237	2.12916e-07	37.7622	52.7582	143	54
TRINITY_DN475751_c14_g1_i7	NAC	285	gnl|BL_ORD_ID|128048Itr_sc004419.1_g00003.1 Ipomoea trifida|NAC|NAC family protein	128048	5.88606e-16	61.3636	76.6406	88	54
TRINITY_DN466904_c3_g4_i1	NAC	206	gnl|BL_ORD_ID|296846TRIUR3_11787-P1 Triticum urartu|NAC|NAC family protein	296846	0.000406588	64.1026	40.4318	39	25
TRINITY_DN519560_c43_g10_i4	ERF	239	gnl|BL_ORD_ID|291652XP_010556248.1 Tarenaya hassleriana|ERF|ERF family protein	291652	4.08502e-18	85.7143	82.0333	56	48
TRINITY_DN484382_c8_g1_i1	FAR1	207	gnl|BL_ORD_ID|199065LOC_Os04g22990.1 Oryza sativa subsp. japonica|FAR1|FAR1 family protein	199065	1.00163e-12	71.4286	66.2402	63	45
TRINITY_DN422718_c0_g2_i1	B3	232	gnl|BL_ORD_ID|21154EMT05021 Aegilops tauschii|B3|B3 family protein	21154	2.54197e-07	59.6154	50.0618	52	31
TRINITY_DN412354_c0_g1_i3	B3	211	gnl|BL_ORD_ID|297270TRIUR3_16915-P1 Triticum urartu|B3|B3 family protein	297270	3.9326e-11	72.3404	61.2326	47	34
TRINITY_DN523486_c91_g6_i3	NAC	303	gnl|BL_ORD_ID|128048Itr_sc004419.1_g00003.1 Ipomoea trifida|NAC|NAC family protein	128048	9.24846e-11	52.1277	61.6178	94	49
TRINITY_DN459122_c2_g6_i1	ERF	276	gnl|BL_ORD_ID|20250EMT26591 Aegilops tauschii|ERF|ERF family protein	20250	4.50764e-21	92.0455	86.2705	88	81
TRINITY_DN435565_c0_g1_i2	B3	237	gnl|BL_ORD_ID|270192Sopen00g003940.1 Solanum pennellii|B3|B3 family protein	270192	3.71e-06	54.7945	46.9802	73	40
TRINITY_DN298518_c0_g2_i1	B3	237	gnl|BL_ORD_ID|20166EMT01685 Aegilops tauschii|B3|B3 family protein	20166	0.00790077	62.8571	36.965	35	22
TRINITY_DN514747_c23_g6_i2	bHLH	588	gnl|BL_ORD_ID|297244TRIUR3_29035-P1 Triticum urartu|bHLH|bHLH family protein	297244	6.52539e-24	83.3333	100.908	66	55
TRINITY_DN467593_c57_g1_i2	FAR1	321	gnl|BL_ORD_ID|199065LOC_Os04g22990.1 Oryza sativa subsp. japonica|FAR1|FAR1 family protein	199065	0.0145691	57.5	36.5798	40	23
TRINITY_DN519560_c43_g10_i3	TCP	698	gnl|BL_ORD_ID|270237Sopen12g015990.1 Solanum pennellii|TCP|TCP family protein	270237	1.05092e-92	86.2245	303.908	196	169
TRINITY_DN465380_c5_g1_i1	FAR1	218	gnl|BL_ORD_ID|199065LOC_Os04g22990.1 Oryza sativa subsp. japonica|FAR1|FAR1 family protein	199065	1.3589e-15	65.2778	74.7146	72	47
TRINITY_DN476206_c6_g3_i10	NAC	283	gnl|BL_ORD_ID|128048Itr_sc004419.1_g00003.1 Ipomoea trifida|NAC|NAC family protein	128048	1.95808e-20	63.4409	89.7373	93	59
TRINITY_DN472942_c7_g6_i3	bHLH	320	gnl|BL_ORD_ID|297244TRIUR3_29035-P1 Triticum urartu|bHLH|bHLH family protein	297244	3.10593e-06	76.9231	47.7506	39	30
TRINITY_DN522088_c118_g2_i5	FAR1	3440	gnl|BL_ORD_ID|199065LOC_Os04g22990.1 Oryza sativa subsp. japonica|FAR1|FAR1 family protein	199065	6.73548e-146	56.6319	489.189	671	380
TRINITY_DN475198_c17_g4_i2	FAR1	323	gnl|BL_ORD_ID|199065LOC_Os04g22990.1 Oryza sativa subsp. japonica|FAR1|FAR1 family protein	199065	4.48907e-14	52.7473	71.633	91	48
TRINITY_DN430203_c1_g1_i2	ZF-HD	250	gnl|BL_ORD_ID|269698Sopen05g016700.1 Solanum pennellii|ZF-HD|ZF-HD family protein	269698	4.2017e-07	67.2727	50.0618	55	37
TRINITY_DN407964_c1_g1_i1	M-type_MADS	266	gnl|BL_ORD_ID|198356LOC_Os11g12360.1 Oryza sativa subsp. japonica|M-type_MADS|M-type_MADS family protein	198356	2.93227e-17	68.4211	80.4925	76	52
TRINITY_DN489437_c15_g2_i3	B3	449	gnl|BL_ORD_ID|20166EMT01685 Aegilops tauschii|B3|B3 family protein	20166	0.00807077	51.0638	38.5058	94	48
TRINITY_DN478081_c13_g8_i1	AP2	202	gnl|BL_ORD_ID|16047663468 Micromonas sp. RCC299|AP2|AP2 family protein	160476	0.0343736	57.8947	34.2686	38	22
TRINITY_DN389701_c0_g1_i1	C3H	216	gnl|BL_ORD_ID|171871XP_016440619.1 Nicotiana tabacum|C3H|C3H family protein	171871	3.19194e-08	59.2593	52.7582	54	32
TRINITY_DN469331_c3_g1_i2	HD-ZIP	368	gnl|BL_ORD_ID|82545Dca2137.1 Dianthus caryophyllus|HD-ZIP|HD-ZIP family protein	82545	2.60957e-06	44.8718	39.6614	78	35
TRINITY_DN523486_c94_g10_i1	FAR1	209	gnl|BL_ORD_ID|199065LOC_Os04g22990.1 Oryza sativa subsp. japonica|FAR1|FAR1 family protein	199065	2.39506e-20	73.5294	88.1965	68	50
TRINITY_DN255301_c0_g2_i1	C2H2	229	gnl|BL_ORD_ID|297126TRIUR3_34542-P1 Triticum urartu|C2H2|C2H2 family protein	297126	0.000169392	81.8182	41.5874	55	45
TRINITY_DN504236_c37_g3_i1	FAR1	309	gnl|BL_ORD_ID|199065LOC_Os04g22990.1 Oryza sativa subsp. japonica|FAR1|FAR1 family protein	199065	7.00522e-11	46	62.003	100	46
TRINITY_DN378405_c1_g2_i1	bHLH	248	gnl|BL_ORD_ID|297244TRIUR3_29035-P1 Triticum urartu|bHLH|bHLH family protein	297244	0.0389402	77.7778	34.6538	36	28
TRINITY_DN476529_c8_g2_i1	B3	230	gnl|BL_ORD_ID|20166EMT01685 Aegilops tauschii|B3|B3 family protein	20166	7.00733e-06	50.6173	46.2098	81	41
TRINITY_DN500391_c9_g1_i1	B3	225	gnl|BL_ORD_ID|20556EMT22877 Aegilops tauschii|B3|B3 family protein	20556	1.02652e-05	60.4651	44.2838	43	26
TRINITY_DN493879_c29_g2_i3	NAC	201	gnl|BL_ORD_ID|296846TRIUR3_11787-P1 Triticum urartu|NAC|NAC family protein	296846	6.46265e-19	89.5833	82.8037	48	43
TRINITY_DN303547_c0_g1_i1	B3	213	gnl|BL_ORD_ID|270192Sopen00g003940.1 Solanum pennellii|B3|B3 family protein	270192	0.000149804	42.3077	41.9726	52	22
TRINITY_DN491144_c8_g8_i3	NAC	259	gnl|BL_ORD_ID|128048Itr_sc004419.1_g00003.1 Ipomoea trifida|NAC|NAC family protein	128048	0.000389411	67.4419	41.2022	43	29
TRINITY_DN512882_c12_g8_i6	EIL	313	gnl|BL_ORD_ID|296967TRIUR3_20987-P1 Triticum urartu|EIL|EIL family protein	296967	3.74093e-15	57.1429	73.9442	91	52
TRINITY_DN475719_c5_g1_i1	ERF	255	gnl|BL_ORD_ID|291652XP_010556248.1 Tarenaya hassleriana|ERF|ERF family protein	291652	1.16586e-27	77.6471	109.768	85	66
TRINITY_DN5885_c1_g1_i1	GATA	247	gnl|BL_ORD_ID|296559TRIUR3_22272-P1 Triticum urartu|GATA|GATA family protein	296559	2.9947e-12	82.0513	64.6994	39	32
TRINITY_DN444286_c1_g1_i1	FAR1	220	gnl|BL_ORD_ID|199065LOC_Os04g22990.1 Oryza sativa subsp. japonica|FAR1|FAR1 family protein	199065	5.65551e-13	60.8696	67.0106	69	42
TRINITY_DN459017_c10_g3_i15	FAR1	355	gnl|BL_ORD_ID|199065LOC_Os04g22990.1 Oryza sativa subsp. japonica|FAR1|FAR1 family protein	199065	4.71533e-05	54.5455	33.113	44	24
TRINITY_DN420243_c1_g2_i1	HD-ZIP	209	gnl|BL_ORD_ID|180158OBART08G09450.1 Oryza barthii|HD-ZIP|HD-ZIP family protein	180158	0.0364703	50	34.6538	48	24
TRINITY_DN505465_c6_g11_i3	M-type_MADS	369	gnl|BL_ORD_ID|198356LOC_Os11g12360.1 Oryza sativa subsp. japonica|M-type_MADS|M-type_MADS family protein	198356	8.42858e-08	48.8189	53.5286	127	62
TRINITY_DN470634_c2_g6_i2	FAR1	280	gnl|BL_ORD_ID|199065LOC_Os04g22990.1 Oryza sativa subsp. japonica|FAR1|FAR1 family protein	199065	2.94618e-13	63.2184	68.9366	87	55
TRINITY_DN203911_c1_g1_i1	AP2	294	gnl|BL_ORD_ID|150709MDP0000824178 Malus domestica|AP2|AP2 family protein	150709	0.0340743	58.5366	35.039	41	24
TRINITY_DN462188_c3_g1_i2	ZF-HD	265	gnl|BL_ORD_ID|269698Sopen05g016700.1 Solanum pennellii|ZF-HD|ZF-HD family protein	269698	3.80499e-11	56.3218	62.3882	87	49
TRINITY_DN474002_c6_g1_i4	HD-ZIP	282	gnl|BL_ORD_ID|82545Dca2137.1 Dianthus caryophyllus|HD-ZIP|HD-ZIP family protein	82545	0.000477301	46.0317	30.4166	63	29
TRINITY_DN519560_c43_g8_i5	ERF	622	gnl|BL_ORD_ID|291652XP_010556248.1 Tarenaya hassleriana|ERF|ERF family protein	291652	1.05213e-87	77.2947	285.419	207	160
TRINITY_DN460695_c16_g3_i2	NAC	319	gnl|BL_ORD_ID|128048Itr_sc004419.1_g00003.1 Ipomoea trifida|NAC|NAC family protein	128048	4.03165e-19	63.6364	86.2705	110	70
TRINITY_DN467481_c7_g2_i2	TCP	268	gnl|BL_ORD_ID|270237Sopen12g015990.1 Solanum pennellii|TCP|TCP family protein	270237	1.51927e-35	86.747	133.265	83	72
TRINITY_DN504236_c38_g9_i6	FAR1	272	gnl|BL_ORD_ID|199065LOC_Os04g22990.1 Oryza sativa subsp. japonica|FAR1|FAR1 family protein	199065	6.35326e-10	54.4444	58.9214	90	49
TRINITY_DN471946_c7_g2_i1	FAR1	278	gnl|BL_ORD_ID|199065LOC_Os04g22990.1 Oryza sativa subsp. japonica|FAR1|FAR1 family protein	199065	1.74607e-08	50.5376	54.6842	93	47
TRINITY_DN445192_c0_g3_i1	NAC	206	gnl|BL_ORD_ID|296846TRIUR3_11787-P1 Triticum urartu|NAC|NAC family protein	296846	4.2181e-16	88.0952	74.7146	42	37
TRINITY_DN477924_c54_g1_i2	B3	534	gnl|BL_ORD_ID|297270TRIUR3_16915-P1 Triticum urartu|B3|B3 family protein	297270	0.00163013	60.4651	41.2022	43	26
TRINITY_DN481456_c88_g12_i1	FAR1	876	gnl|BL_ORD_ID|82637Dca43462.1 Dianthus caryophyllus|FAR1|FAR1 family protein	82637	2.8977e-35	59.8901	139.428	182	109
TRINITY_DN477905_c17_g1_i3	FAR1	280	gnl|BL_ORD_ID|199065LOC_Os04g22990.1 Oryza sativa subsp. japonica|FAR1|FAR1 family protein	199065	1.69975e-10	60	60.4622	65	39
TRINITY_DN474565_c13_g11_i1	B3	235	gnl|BL_ORD_ID|21154EMT05021 Aegilops tauschii|B3|B3 family protein	21154	1.86904e-19	88.0952	84.3445	42	37
TRINITY_DN475153_c14_g5_i1	B3	374	gnl|BL_ORD_ID|270192Sopen00g003940.1 Solanum pennellii|B3|B3 family protein	270192	6.92987e-05	55.7377	44.2838	61	34
TRINITY_DN424957_c1_g2_i2	G2-like	258	gnl|BL_ORD_ID|269678Sopen11g010100.1 Solanum pennellii|G2-like|G2-like family protein	269678	8.70649e-10	53.1646	58.151	79	42
TRINITY_DN456666_c10_g7_i2	MYB	209	gnl|BL_ORD_ID|231632Pta007218 Pinus taeda|MYB|MYB family protein	231632	0.0113948	54.5455	35.8094	55	30
TRINITY_DN401408_c0_g1_i1	NAC	221	gnl|BL_ORD_ID|128048Itr_sc004419.1_g00003.1 Ipomoea trifida|NAC|NAC family protein	128048	0.00033541	52.7778	41.2022	72	38
TRINITY_DN518881_c39_g2_i4	NAC	303	gnl|BL_ORD_ID|128048Itr_sc004419.1_g00003.1 Ipomoea trifida|NAC|NAC family protein	128048	1.29851e-08	58.4416	55.4546	77	45
[truncated: 6,319 more rows]

## Sheet: 3. C5vs.C7
Sequence name	Sequence desc.	Sequence length	Hit desc.	Hit ACC	E-Value	Similarity	Bit-Score	Alignment length	Positives
[truncated: 27 more rows]

## Sheet: 4. R1vs.R2 (No DEG found)
id	log2FoldChange	padj	DGE	contig_length	GCperc	NCBIAccession	IdentityPerc	E_value	UniprotAccession	GeneID	GeneSymbol	GeneDescription	ProteinID	Status	ProteinNames	GeneNames	Organism	Length	ECNumber	Domain	GO	GOID	ProteinFamilies	DevStage	TemperatureDependence	TissueSpecificity	PhDependence	KEGG	PDB	RefSeq	eggNOG	OrthoDB	BioCyc	BRENDA	UniPathway	PANTHER	Pfam	TIGRFAMs	PROSITE	TAIR	SubcellularLocation	InterPro	qseqid_gotHit_withPMN	qlen_withPMN	sseqid_withPMN	qlength_withPMN	percIdentity_withPMN	slength_withPMN	mismatch_withPMN
[truncated: 1 more rows]
[truncated: 29 more columns]

[truncated: 6 more sheets: 5. R2vs.R5, 6. R5vs.R7, 7. C1vs. R1(No DEGs found), 8. C2vs.R2, 9. C5vs.R5, 10. C7vs.R7]
